# Supplementary material for: Metastatic Tumor Cell-Specific FABP7 Promotes NSCLC Metastasis via Inhibiting β-Catenin Degradation
Source: MDPI journal article supplement (doi:10.3390/cells11050805), 2022-02-25
Supplement: s1 [file s1]

## **Supplementary Figure legends**

### **Figure S1. Quality control and main cell types identification of single-cell RNA sequencing data.**

(A) Preliminary quality control. Thresholds of detected genes per cell (nFeature\_RNA), detected counts per cell (nCount\_RNA), and percentage of mitochondrial genes counts (Percent.mt) are shown. (B) and (C) Principal component analysis based on different cell cycles (B) or mitochondrial genes expression (C). Distinctions of Cells distribution reflect the influence of cell cycling (B) or mitochondrial genes expression (C) on clustering. (D) UMAP visualization of unsupervised primary clustering. Clusters are indexed in order of cells amount. (E) and (F) Identifications of primary clustering. Cell-defining markers expressions of each cluster (E) were used to identify well-known cell types. Cell-defining markers expressions of identified cell types (F) were used to examine the result of identification.

### **Figure S2. Identification and cell proportion summary of cell subtypes.**

(A-C) Cell subtypes identification. Subtypes of NK and T cells (A), myeloid cells (B), and plasma cells (C) were independently clustered and identified. Cell-defining markers expressions of indicated cell types were used to examine the results of identification. (D) Cell proportion summary of all cell subtypes in the tumor tissue.

### **Figure S3. Expression patterns and first progression analyses of FABP3-7.**

(A) FABP3-7 expressions of all cells shown by heatmap. Expression levels are labeled by the intensity of red color. (B) Average expressions of FABP3-7 in all main cell types split by adjacent (left) or tumor tissues (right). (C) Differentially expressed FABPs in metastatic vs. non-metastatic tumor tissues. Expression changes of FABP3 and FABP6 are not significant and thus not presented. The adjusted p-value of FABP7 in tumor cells is approximate to 0, so it has been assigned to  $10e-200$  only for visualization purpose. (D) Kaplan-Meier first progression (FP) analyses of FABP3-7 in NSCLC based on KM-plotter.

**Figure S4. Metastasis-related GO analysis and GSEA.**

(A) GSEA enrichments of scRNAseq for metastasis-related gene sets. (B) and (C) GO analysis (B) and GSEA (C) of TCGA NSCLC bulk-seq for metastasis-related gene sets.

**Figure S5. Detection of FABP7 on cell proliferation.**

Representative images of three independent reproducible experiments and quantitation of cells colony formation by FABP7 over-expression in A549 and H1975.

**Figure S6. GO/KEGG analyses and qPCR for lipid-related pathways.**

(A) GO and KEGG analyses for lipid-related pathways (based on DEGs of metastatic vs. non-metastatic all cell types). (B) GO and KEGG analyses for lipid-related pathways (based on DEGs of FABP7-positive vs. FABP7-negative tumor cells). (C)

The qPCR validations of lipid droplets markers.

**Figure S7. GO analysis and GSEA for Wnt signaling pathway.**

(A) and (B) GO analysis (A) and GSEA (B) of TCGA NSCLC bulk-seq for the Wnt signaling pathway.
