# Supplementary material for: Metastatic Tumor Cell-Specific FABP7 Promotes NSCLC Metastasis via Inhibiting β-Catenin Degradation
Source: Cells. 2022 Feb 25;11(5):805. doi: 10.3390/cells11050805 (PMC8909100; doi:10.3390/cells11050805)
Supplement: Supplementary file 1 [file cells-11-00805-s001.zip]

Archive with 11 entries (11 files):
- cells-1593659-supplementary/FigureS1.tif
- cells-1593659-supplementary/FigureS2.tif
- cells-1593659-supplementary/FigureS3.tif
- cells-1593659-supplementary/FigureS4.tif
- cells-1593659-supplementary/FigureS5.tif
- cells-1593659-supplementary/FigureS6.tif
- cells-1593659-supplementary/FigureS7.tif
- cells-1593659-supplementary/Supplementary Figure legends.pdf
- cells-1593659-supplementary/TableS1-metastatic vs. non-metastatic all cell types GO.xlsx
- cells-1593659-supplementary/TableS2-metastatic vs. non-metastatic all cell types KEGG.xlsx
- cells-1593659-supplementary/TableS3-FABP7 positive vs. negative TUMOR GO and KEGG.xlsx
