# Supplementary material for: Metastatic Tumor Cell-Specific FABP7 Promotes NSCLC Metastasis via Inhibiting β-Catenin Degradation
Source: Cells. 2022 Feb 25;11(5):805. doi: 10.3390/cells11050805 (PMC8909100; doi:10.3390/cells11050805)
Supplement: Supplementary file 1 [file cells-11-00805-s001.zip › cells-1593659-supplementary/TableS2-metastatic vs. non-metastatic all cell types KEGG.xlsx]

## Sheet: B_cell_KEGG.csv
V1

## Sheet: CD4+_Tem_KEGG.csv
V1

## Sheet: CD4+_Th_KEGG.csv
V1

## Sheet: CD8+_Cytotoxic_T_KEGG.csv
V1

## Sheet: CD8+_Exhausted_T_KEGG.csv
V1

## Sheet: DC_KEGG.csv
V1

## Sheet: Endothelial_cell_KEGG.csv
V1

## Sheet: EPITHELIAL_KEGG.csv
V1

## Sheet: Fibroblast_KEGG.csv
V1

## Sheet: Macrophage_KEGG.csv
V1

[truncated: 9 more sheets: MAST_KEGG.csv, Monocyte_KEGG.csv, Naive_T_KEGG.csv, NK_KEGG.csv, NKT_KEGG.csv, Plasma_cell_KEGG.csv, Red_cell_KEGG.csv, Treg_KEGG.csv, TUMOR_KEGG.csv]
