# Supplementary material for: Metastatic Tumor Cell-Specific FABP7 Promotes NSCLC Metastasis via Inhibiting β-Catenin Degradation
Source: Cells. 2022 Feb 25;11(5):805. doi: 10.3390/cells11050805 (PMC8909100; doi:10.3390/cells11050805)
Supplement: Supplementary file 1 [file cells-11-00805-s001.zip › cells-1593659-supplementary/TableS3-FABP7 positive vs. negative TUMOR GO and KEGG.xlsx]

## Sheet: GO
ONTOLOGY	ID	Description	GeneRatio	BgRatio	pvalue	p.adjust	qvalue	geneID	Count
BP	GO:0006402	mRNA catabolic process	147/2365	375/18862	7.7355e-40	4.6676e-36	3.60393e-36	YBX1/RPL5/PSMB9/RPS12/RPS6/RPS19/RPL18/RPL13A/RPL28/RPS8/RPS18/NPM1/RPL11/RPL4/RPS27A/RPL35A/PSMB1/RPS26/RPS11/SERBP1/RPS14/HSPB1/PSMB8/PSMA4/RPL37/RPS9/RPS2/RPS29/RPSA/RPL18A/RPL24/SSB/RPS10/EIF3E/RPL10/PAIP1/EXOSC5/RPL21/RPS23/RPL27A/RPL10A/PSMC4/PSMA7/ANP32A/YWHAB/RPL8/RPL15/RPS13/BTG2/PSME2/RPL26/RPS7/ALKBH5/PSME1/MAGOH/PSMD14/RPS21/EXOSC3/RPL22/PSMA5/HNRNPA0/YTHDF2/RPS20/CSDE1/SYNCRIP/MAGOHB…	147
BP	GO:0006401	RNA catabolic process	153/2365	414/18862	8.07287e-38	2.43559e-34	1.88055e-34	YBX1/RPL5/PSMB9/RPS12/RPS6/RPS19/RPL18/RPL13A/RPL28/RPS8/RPS18/NPM1/RPL11/RPL4/RPS27A/RPL35A/PSMB1/RPS26/RPS11/SERBP1/RPS14/HSPB1/PSMB8/PSMA4/RPL37/RPS9/RPS2/RPS29/RPSA/RPL18A/RPL24/SSB/RPS10/EIF3E/RPL10/PAIP1/EXOSC5/RPL21/RPS23/RPL27A/RPL10A/PSMC4/PSMA7/ANP32A/YWHAB/RPL8/RPL15/RPS13/BTG2/PSME2/RPL26/RPS7/ALKBH5/PSME1/MAGOH/PSMD14/RPS21/EXOSC3/RPL22/PSMA5/HNRNPA0/YTHDF2/RPS20/CSDE1/SYNCRIP/MAGOHB…	153
BP	GO:0006413	translational initiation	91/2365	193/18862	2.13806e-32	4.30036e-29	3.32037e-29	RPL5/RPS12/RPS6/RPS19/RPL18/RPL13A/RPL28/RPS8/RPS18/NPM1/RPL11/RPL4/RPS27A/RPL35A/RPS26/RPS11/RPS14/HSPB1/RPL37/RPS9/EIF2AK2/RPS2/RPS29/RPSA/RPL18A/RPL24/RPS10/EIF3E/RPL10/PAIP1/EIF3M/RPL21/RPS23/RPL27A/RPL10A/RPL8/RPL15/RPS13/EIF4EBP1/RPL26/RPS7/EIF3K/RPS21/KHDRBS1/RPL22/EIF2A/YTHDF2/RPS20/CSDE1/CDC123/RPLP1/RPL19/RPS5/EIF4A1/RPL31/EIF3D/RPL35/RPS16/RPL32/RPL3/RPL14/RPS4Y1/EIF4A2/POLR2G/EIF2B3/T…	91
BP	GO:0000956	nuclear-transcribed mRNA catabolic process	92/2365	208/18862	4.68714e-30	7.07054e-27	5.45928e-27	RPL5/RPS12/RPS6/RPS19/RPL18/RPL13A/RPL28/RPS8/RPS18/RPL11/RPL4/RPS27A/RPL35A/RPS26/RPS11/RPS14/RPL37/RPS9/RPS2/RPS29/RPSA/RPL18A/RPL24/SSB/RPS10/EIF3E/RPL10/EXOSC5/RPL21/RPS23/RPL27A/RPL10A/RPL8/RPL15/RPS13/BTG2/RPL26/RPS7/MAGOH/RPS21/EXOSC3/RPL22/RPS20/CSDE1/MAGOHB/PPP2R1A/RPLP1/XRN2/RPL19/RPS5/ETF1/MTPAP/RPL31/RPL35/PNRC2/RPS16/RPL32/RPL3/RPL14/RPS4Y1/CNOT7/THRAP3/HBS1L/POLR2G/ZFP36/EXOSC9/NBDY…	92
BP	GO:0045047	protein targeting to ER	67/2365	120/18862	7.93529e-30	9.57631e-27	7.39402e-27	RPL5/RPS12/RPS6/RPS19/RPL18/RPL13A/RPL28/RPS8/RPS18/RPL11/RPL4/RPS27A/RPL35A/RPS26/RPS11/RPS14/RPL37/RPS9/RPS2/RPS29/RPSA/RPL18A/RPL24/SRP9/RPS10/RPL10/RPL21/RPS23/RPL27A/RPL10A/RPL8/RPL15/RPS13/RPL26/RPS7/RPS21/RPL22/RPS20/TRAM1/RPLP1/RPL19/RPS5/RPL31/RPL35/RPS16/RPL32/RPL3/RPL14/RPS4Y1/SEC61B/SPCS1/SEC61G/SPCS3/SEC63/RPL38/RPS25/RPS28/RPLP2/SRPRA/SRP19/RPL12/SEC62/RPL29/SEC61A1/RPS27/SPCS2/HSPA5	67
BP	GO:0070972	protein localization to endoplasmic reticulum	76/2365	152/18862	2.16894e-29	2.18123e-26	1.68416e-26	RPL5/RPS12/RPS6/RPS19/RPL18/RPL13A/RPL28/RPS8/RPS18/RPL11/RPL4/RPS27A/RPL35A/RPS26/RPS11/RPS14/RPL37/RPS9/RPS2/RPS29/RPSA/RPL18A/RPL24/SRP9/RPS10/RPL10/RPL21/RPS23/RPL27A/RPL10A/RPL8/RPL15/RPS13/RPL26/RPS7/INSIG1/RPS21/RPL22/RPS20/TRAM1/RPLP1/RPL19/RPS5/RPL31/RPL35/RPS16/RPL32/RPL3/RPL14/RPS4Y1/SEC61B/SPCS1/SEC61G/SPCS3/SEC63/PPP1R15A/SEC16A/RPL38/KDELR2/RPS25/RPS28/KDELR3/RPLP2/SRPRA/SRP19/RPL12…	76
BP	GO:0006613	cotranslational protein targeting to membrane	63/2365	110/18862	5.50327e-29	4.74382e-26	3.66278e-26	RPL5/RPS12/RPS6/RPS19/RPL18/RPL13A/RPL28/RPS8/RPS18/RPL11/RPL4/RPS27A/RPL35A/RPS26/RPS11/RPS14/RPL37/RPS9/RPS2/RPS29/RPSA/RPL18A/RPL24/SRP9/RPS10/RPL10/RPL21/RPS23/RPL27A/RPL10A/RPL8/RPL15/RPS13/RPL26/RPS7/RPS21/RPL22/RPS20/TRAM1/RPLP1/RPL19/RPS5/RPL31/RPL35/RPS16/RPL32/RPL3/RPL14/RPS4Y1/SEC61B/SEC63/RPL38/RPS25/RPS28/RPLP2/SRPRA/SRP19/RPL12/SEC62/SSR2/RPL29/SEC61A1/RPS27	63
BP	GO:0000184	nuclear-transcribed mRNA catabolic process, nonsense-mediated decay	66/2365	120/18862	7.0719e-29	5.33398e-26	4.11845e-26	RPL5/RPS12/RPS6/RPS19/RPL18/RPL13A/RPL28/RPS8/RPS18/RPL11/RPL4/RPS27A/RPL35A/RPS26/RPS11/RPS14/RPL37/RPS9/RPS2/RPS29/RPSA/RPL18A/RPL24/RPS10/EIF3E/RPL10/RPL21/RPS23/RPL27A/RPL10A/RPL8/RPL15/RPS13/RPL26/RPS7/MAGOH/RPS21/RPL22/RPS20/MAGOHB/PPP2R1A/RPLP1/RPL19/RPS5/ETF1/RPL31/RPL35/PNRC2/RPS16/RPL32/RPL3/RPL14/RPS4Y1/PPP2CA/RPL38/RPS25/NCBP2/RPS28/RBM8A/UPF2/RPLP2/RPL12/RPL29/RPS27/PYM1/SECISBP2	66
BP	GO:0072599	establishment of protein localization to endoplasmic reticulum	67/2365	124/18862	1.12713e-28	7.55676e-26	5.83469e-26	RPL5/RPS12/RPS6/RPS19/RPL18/RPL13A/RPL28/RPS8/RPS18/RPL11/RPL4/RPS27A/RPL35A/RPS26/RPS11/RPS14/RPL37/RPS9/RPS2/RPS29/RPSA/RPL18A/RPL24/SRP9/RPS10/RPL10/RPL21/RPS23/RPL27A/RPL10A/RPL8/RPL15/RPS13/RPL26/RPS7/RPS21/RPL22/RPS20/TRAM1/RPLP1/RPL19/RPS5/RPL31/RPL35/RPS16/RPL32/RPL3/RPL14/RPS4Y1/SEC61B/SPCS1/SEC61G/SPCS3/SEC63/RPL38/RPS25/RPS28/RPLP2/SRPRA/SRP19/RPL12/SEC62/RPL29/SEC61A1/RPS27/SPCS2/HSPA5	67
BP	GO:0006614	SRP-dependent cotranslational protein targeting to membrane	61/2365	105/18862	1.39319e-28	8.4065e-26	6.49079e-26	RPL5/RPS12/RPS6/RPS19/RPL18/RPL13A/RPL28/RPS8/RPS18/RPL11/RPL4/RPS27A/RPL35A/RPS26/RPS11/RPS14/RPL37/RPS9/RPS2/RPS29/RPSA/RPL18A/RPL24/SRP9/RPS10/RPL10/RPL21/RPS23/RPL27A/RPL10A/RPL8/RPL15/RPS13/RPL26/RPS7/RPS21/RPL22/RPS20/TRAM1/RPLP1/RPL19/RPS5/RPL31/RPL35/RPS16/RPL32/RPL3/RPL14/RPS4Y1/SEC61B/SEC63/RPL38/RPS25/RPS28/RPLP2/SRPRA/SRP19/RPL12/RPL29/SEC61A1/RPS27	61
BP	GO:0019080	viral gene expression	87/2365	198/18862	3.1132e-28	1.70773e-25	1.31856e-25	RPL5/RPS12/RPS6/RPS19/RPL18/RPL13A/RPL28/RPS8/RPS18/RPL11/RPL4/RPS27A/RPL35A/RPS26/RPS11/RPS14/RPL37/IFITM3/RPS9/RPS2/RPS29/RPSA/RPL18A/RPL24/SSB/RPS10/RPL10/RPL21/RPS23/RPL27A/RPL10A/NELFCD/RPL8/RAE1/SMARCB1/RPL15/RPS13/RPL26/RPS7/FURIN/NUCKS1/RPS21/POU2F3/RPL22/RPS20/CSDE1/JUN/RPLP1/HDAC1/RPL19/RPS5/POLR2L/RPL31/EIF3D/RPL35/TAF11/RPS16/RPL32/POLR2I/RPL3/RPL14/RPS4Y1/SPCS1/GTF2B/SPCS3/POLR2G/ZFP…	87
BP	GO:0022613	ribonucleoprotein complex biogenesis	147/2365	473/18862	5.10063e-27	2.56477e-24	1.9803e-24	RPL5/PSIP1/RPS6/RPS19/RPL13A/HSP90AB1/RPS8/NPM1/RPL11/FBL/RPL35A/HSP90AA1/RPS14/XRCC5/RPS9/SNRPE/RPS2/GNL2/RPSA/RPL24/RPS10/EIF3E/NOP58/RPL10/EXOSC5/EIF3M/GLUL/SNRPD1/RAN/SNRPD2/BRIX1/RPF2/NOP53/RPL10A/NOL8/IMP4/NIFK/RPP40/RPL26/SRSF10/RPS7/WDR12/SF3A3/GTPBP4/RBMX/EIF3K/RCL1/RPS21/EXOSC3/EIF2A/PRPF31/DDX18/WDR3/PA2G4/PAK1IP1/PWP1/STRAP/NOC2L/XRN2/SNRPF/PTGES3/RPS5/SNRPD3/MPHOSPH10/DKC1/ERI3/WBP11…	147
BP	GO:0043312	neutrophil degranulation	148/2365	485/18862	2.79834e-26	1.29886e-23	1.00287e-23	S100A11/S100P/HLA-B/EEF1A1/CSTB/HSP90AB1/TUBB/GDI2/S100A7/PSMB1/FTL/HSP90AA1/CDA/B2M/XRCC5/LTF/LCN2/CCT2/HLA-C/CTSB/CFD/COMMD3/SERPINA1/ILF2/CST3/NPC2/CD63/STOM/DYNLT1/CD55/HMGB1/ALDH3B1/PSMD14/QSOX1/PSMA5/PA2G4/SDCBP/PLAU/C3/CEACAM6/LGALS3/ITGB2/ARPC5/SLPI/GYG1/HSPA1A/TCN1/CTSD/CSNK2B/SURF4/RNASET2/CEACAM1/CD68/GSTP1/RHOF/AGPAT2/S100A8/HGSNAT/CALML5/VCP/ATP11A/TIMP2/GCA/ARSA/ANXA2/PSMD1/HSPA8/PD…	148
BP	GO:0002283	neutrophil activation involved in immune response	148/2365	488/18862	5.66421e-26	2.44127e-23	1.88495e-23	S100A11/S100P/HLA-B/EEF1A1/CSTB/HSP90AB1/TUBB/GDI2/S100A7/PSMB1/FTL/HSP90AA1/CDA/B2M/XRCC5/LTF/LCN2/CCT2/HLA-C/CTSB/CFD/COMMD3/SERPINA1/ILF2/CST3/NPC2/CD63/STOM/DYNLT1/CD55/HMGB1/ALDH3B1/PSMD14/QSOX1/PSMA5/PA2G4/SDCBP/PLAU/C3/CEACAM6/LGALS3/ITGB2/ARPC5/SLPI/GYG1/HSPA1A/TCN1/CTSD/CSNK2B/SURF4/RNASET2/CEACAM1/CD68/GSTP1/RHOF/AGPAT2/S100A8/HGSNAT/CALML5/VCP/ATP11A/TIMP2/GCA/ARSA/ANXA2/PSMD1/HSPA8/PD…	148
BP	GO:0002446	neutrophil mediated immunity	150/2365	499/18862	7.2051e-26	2.89837e-23	2.23788e-23	S100A11/S100P/HLA-B/EEF1A1/CSTB/HSP90AB1/TUBB/GDI2/S100A7/PSMB1/FTL/HSP90AA1/CDA/B2M/XRCC5/LTF/LCN2/CCT2/HLA-C/CTSB/CFD/COMMD3/SERPINA1/ILF2/CST3/NPC2/CD63/STOM/DYNLT1/CD55/HMGB1/ALDH3B1/PSMD14/QSOX1/PSMA5/PA2G4/SDCBP/PLAU/C3/CEACAM6/LGALS3/ITGB2/ARPC5/SLPI/GYG1/HSPA1A/TCN1/CTSD/CSNK2B/SURF4/RNASET2/CEACAM1/CD68/GSTP1/RHOF/AGPAT2/S100A8/HGSNAT/CALML5/VCP/ATP11A/TIMP2/GCA/ARSA/ANXA2/PSMD1/HSPA8/PD…	150
BP	GO:0090150	establishment of protein localization to membrane	119/2365	354/18862	2.35015e-25	8.86299e-23	6.84325e-23	RPL5/RPS12/RPS6/RPS19/RPL18/RPL13A/RPL28/RPS8/RPS18/RPL11/RPL4/RPS27A/RPL35A/RPS26/RPS11/HSP90AA1/RPS14/RPL37/TFDP2/RPS9/RPS2/RPS29/OPTN/RPSA/RPL18A/RPL24/SRP9/RPS10/SFN/RPL10/NACA/RPL21/BCL2/RPS23/RPL27A/RTP4/RACK1/RPL10A/YWHAB/RPL8/RPL15/RPS13/PDCD5/STOM/RPL26/RPS7/RPS21/RPL22/RPS20/SDCBP/PEX26/RAB11A/CD24/HSPA4/ITGB2/TRAM1/RPLP1/YWHAQ/PEX3/FIS1/RPL19/RPS5/CIB1/RPL31/RPL35/TP53/RPS16/RPL32/RPL3…	119
BP	GO:0042119	neutrophil activation	148/2365	500/18862	8.78231e-25	3.1172e-22	2.40684e-22	S100A11/S100P/HLA-B/EEF1A1/CSTB/HSP90AB1/TUBB/GDI2/S100A7/PSMB1/FTL/HSP90AA1/CDA/B2M/XRCC5/LTF/LCN2/CCT2/HLA-C/CTSB/CFD/COMMD3/SERPINA1/ILF2/CST3/NPC2/CD63/STOM/DYNLT1/CD55/HMGB1/ALDH3B1/PSMD14/QSOX1/PSMA5/PA2G4/SDCBP/PLAU/C3/CEACAM6/LGALS3/ITGB2/ARPC5/SLPI/GYG1/HSPA1A/TCN1/CTSD/CSNK2B/SURF4/RNASET2/CEACAM1/CD68/GSTP1/RHOF/AGPAT2/S100A8/HGSNAT/CALML5/VCP/ATP11A/TIMP2/GCA/ARSA/ANXA2/PSMD1/HSPA8/PD…	148
BP	GO:0019083	viral transcription	76/2365	180/18862	1.66829e-23	5.59249e-21	4.31805e-21	RPL5/RPS12/RPS6/RPS19/RPL18/RPL13A/RPL28/RPS8/RPS18/RPL11/RPL4/RPS27A/RPL35A/RPS26/RPS11/RPS14/RPL37/IFITM3/RPS9/RPS2/RPS29/RPSA/RPL18A/RPL24/RPS10/RPL10/RPL21/RPS23/RPL27A/RPL10A/NELFCD/RPL8/RAE1/SMARCB1/RPL15/RPS13/RPL26/RPS7/NUCKS1/RPS21/POU2F3/RPL22/RPS20/JUN/RPLP1/HDAC1/RPL19/RPS5/POLR2L/RPL31/RPL35/TAF11/RPS16/RPL32/POLR2I/RPL3/RPL14/RPS4Y1/GTF2B/POLR2G/ZFP36/TPR/SMARCA4/HPN/NUP62/PSMC3/RPL…	76
BP	GO:0006612	protein targeting to membrane	83/2365	211/18862	4.38217e-23	1.39168e-20	1.07454e-20	RPL5/RPS12/RPS6/RPS19/RPL18/RPL13A/RPL28/RPS8/RPS18/RPL11/RPL4/RPS27A/RPL35A/RPS26/RPS11/RPS14/RPL37/RPS9/RPS2/RPS29/RPSA/RPL18A/RPL24/SRP9/RPS10/RPL10/NACA/RPL21/RPS23/RPL27A/RTP4/RPL10A/RPL8/RPL15/RPS13/STOM/RPL26/RPS7/RPS21/RPL22/RPS20/SDCBP/PEX26/ITGB2/TRAM1/RPLP1/PEX3/FIS1/RPL19/RPS5/CIB1/RPL31/RPL35/RPS16/RPL32/RPL3/RPL14/RPS4Y1/SEC61B/SEC61G/SEC63/ZDHHC12/CHP1/ZDHHC9/NACA2/RPL38/ERBB2/RPS2…	83
BP	GO:0042254	ribosome biogenesis	102/2365	307/18862	1.80505e-21	5.44584e-19	4.20482e-19	RPL5/RPS6/RPS19/RPS8/NPM1/RPL11/FBL/RPL35A/RPS14/XRCC5/RPS9/RPS2/GNL2/RPSA/RPL24/RPS10/NOP58/RPL10/EXOSC5/GLUL/RAN/BRIX1/RPF2/NOP53/RPL10A/NOL8/IMP4/NIFK/RPP40/RPL26/RPS7/WDR12/GTPBP4/RCL1/RPS21/EXOSC3/EIF2A/DDX18/WDR3/PA2G4/PAK1IP1/PWP1/NOC2L/XRN2/RPS5/MPHOSPH10/DKC1/ERI3/WBP11/TRMT61B/RPL35/RPS16/WDR75/RPL3/ZNF622/RPL14/SRFBP1/UTP11/UTP4/NOP56/WDR43/NOB1/RPF1/C1QBP/NVL/DCAF13/EXOSC9/RPL7L1/DDX2…	102
BP	GO:0006605	protein targeting	128/2365	441/18862	9.2989e-21	2.67188e-18	2.063e-18	RPL5/RPS12/RPS6/RPS19/RPL18/RPL13A/RPL28/RPS8/RPS18/RPL11/RPL4/RPS27A/RPL35A/RPS26/RPS11/HSPD1/HSP90AA1/RPS14/RPL37/RPS9/RPS2/RPS29/RPSA/RPL18A/RPL24/SRP9/RPS10/RPL10/NACA/RPL21/RPS23/RPL27A/RTP4/SAE1/RPL10A/YWHAB/RPL8/RPL15/RPS13/PDCD5/STOM/RPL26/RPS7/SLC25A6/RPS21/RPL22/RPS20/SDCBP/PEX26/HSPA4/ITGB2/ATP5IF1/TRAM1/RPLP1/YWHAQ/PEX3/FIS1/RPL19/UBE2D2/HSD17B4/RPS5/CIB1/TOMM20/RPL31/GNPTAB/RPL35/RPS…	128
BP	GO:0002181	cytoplasmic translation	50/2365	102/18862	2.53527e-19	6.95356e-17	5.36896e-17	RPL18/RPL13A/RPL11/RPL35A/RPS26/RPS29/RPSA/RPL18A/RPL24/DRG2/EIF3E/EIF3M/RPS23/RPL10A/RPL8/RPL15/RPL26/EIF3K/RPS21/RPL22/YTHDF2/RPLP1/RPL19/RWDD1/CNBP/EIF4A1/ETF1/DRG1/RPL31/EIF3D/ZC3H15/RPL32/EIF4A2/EIF2B3/YBX3/EIF3I/RPL38/RPS28/RPLP2/EIF3L/DHX36/EIF5/NCK1/EIF3F/EEF2/RPL26L1/EIF2S2/DENR/EIF3B/RPL29	50
BP	GO:1903311	regulation of mRNA metabolic process	103/2365	334/18862	5.41387e-19	1.42032e-16	1.09665e-16	YBX1/PSMB9/NPM1/RPS27A/PSMB1/SERBP1/HSPB1/PSMB8/PSMA4/HNRNPA1/PAIP1/EXOSC5/PSMC4/PSMA7/SRSF3/ANP32A/YWHAB/BTG2/PSME2/SRSF10/ALKBH5/RBMX/PSME1/MAGOH/PSMD14/EXOSC3/KHDRBS1/PSMA5/HNRNPA0/YTHDF2/SYNCRIP/PSMB2/SRSF7/WTAP/HNRNPM/HSPA1A/PSMA3/PSMD8/HNRNPR/NCL/SCGB1A1/FXR1/BARD1/YWHAZ/SNRPA/CNOT7/TIA1/APEX1/SRPK1/HNRNPC/PSMD1/HSPA8/THRAP3/HNRNPK/PSMD7/POLR2G/PSMD4/RBMXL1/YBX3/PSMA1/PSMD11/C1QBP/ZFP36/RBM…	103
BP	GO:0019058	viral life cycle	103/2365	348/18862	1.36938e-17	3.44285e-15	2.65828e-15	IFI16/IFI27/ISG15/HSP90AB1/MX1/CXCR4/CD74/HLA-DRB1/RPS27A/LGALS9/CTSL/LTF/TRIM22/IFITM3/LY6E/PLSCR1/EIF2AK2/HACD3/RPSA/NFIA/DEK/RAN/BCL2/SNX3/CAV2/RAE1/SMARCB1/CAV1/CDC42/STOM/DYNLT1/CD55/FURIN/NUCKS1/IFIT1/P4HB/VPS4B/STAU1/CD81/PROX1/SLPI/PPIH/HTATSF1/HSPA1A/VPS28/PML/SIVA1/ITGA2/OAS2/VCP/LGALS1/CNOT7/KPNA3/SRPK1/HSPA8/SPCS1/CTBP1/TMPRSS4/LAMP1/HYAL1/ITGB6/TNIP1/ITGAV/APOBEC3G/OAS1/TRIM38/TPR/VA…	103
BP	GO:0006364	rRNA processing	76/2365	228/18862	2.01043e-16	4.85237e-14	3.74659e-14	RPL5/RPS6/RPS19/RPS8/RPL11/FBL/RPL35A/RPS14/RPS9/RPS2/NOP58/EXOSC5/RPF2/NOP53/RPL10A/NOL8/IMP4/NIFK/RPP40/RPL26/RPS7/WDR12/GTPBP4/RCL1/RPS21/EXOSC3/DDX18/WDR3/PA2G4/XRN2/MPHOSPH10/DKC1/ERI3/WBP11/TRMT61B/RPL35/RPS16/WDR75/RPL14/SRFBP1/UTP11/UTP4/NOP56/WDR43/NOB1/RPF1/NVL/DCAF13/EXOSC9/RPL7L1/DDX27/EXOSC8/NOL10/BMS1/KRR1/BYSL/RPS25/MRTO4/RPP30/RPS28/GTF2H5/METTL5/RSL1D1/NSA2/DDX52/NOLC1/ISG20/SBDS…	76
BP	GO:0097193	intrinsic apoptotic signaling pathway	87/2365	283/18862	3.73485e-16	8.66772e-14	6.69249e-14	IFI6/IFI16/DNAJA1/NUPR1/CD74/RPL11/MUC1/HSPB1/PARP1/ERO1A/IVNS1ABP/RNF183/SFN/CRIP1/BCL2/RACK1/NKX3-1/CAV1/RPL26/RPS7/ENO1/P4HB/MSH2/CD24/ARHGEF2/BNIP3/NOC2L/HDAC1/CUL2/FIS1/HSPA1A/ERP29/PML/BAK1/SFPQ/BCLAF1/PTTG1IP/PIK3R1/MSH6/S100A8/TP53/KDM1A/ZNF622/TRAP1/NDUFS3/PDCD10/HNRNPK/DDIT3/TOPORS/YBX3/STK24/SOD1/PPP1R15A/PDK1/NFE2L2/DDIT4/AKT1/BAX/CLU/HINT1/EPHA2/HIF1A/CEBPB/DDX5/SELENOS/ARL6IP5/NCK1/…	87
BP	GO:0048002	antigen processing and presentation of peptide antigen	68/2365	194/18862	4.29783e-16	9.34896e-14	7.21848e-14	HLA-B/HLA-DRA/PSMB9/AZGP1/CD74/HLA-DRB1/HLA-DPA1/PSMB1/HLA-DPB1/TAP1/PSMB8/HLA-DMA/PSMA4/CTSL/B2M/CLTA/HLA-C/DCTN3/PSMC4/PSMA7/PSME2/HLA-E/PSME1/PSMD14/PSMA5/PSMB2/HLA-DMB/KIFAP3/HLA-DQB1/AP2S1/CTSD/PSMA3/TAP2/PSMD8/PSMD1/PSMD7/TAPBPL/PSMD4/ITGAV/PSMA1/PSMD11/AP2M1/PSMC3/SEC24D/CAPZB/CTSV/KIF2A/CLTC/DYNC1LI2/PSMD6/PSMD2/HLA-F/SLC11A1/SEC31A/SEC23A/LGMN/KIF2C/PSMD3/CAPZA1/ARF1/CYBA/CTSS/HLA-A/AP1S…	68
BP	GO:0008380	RNA splicing	125/2365	481/18862	4.33827e-16	9.34896e-14	7.21848e-14	YBX1/PSIP1/RPS26/IVNS1ABP/SNRPE/HNRNPF/HNRNPA3/HNRNPA1/SRRM1/SNRPD1/SNRPD2/ZMAT2/IK/U2SURP/SRSF3/RPS13/RBM17/SRSF10/SF3A3/RBM38/ZNF326/RBMX/CDC40/MAGOH/KHDRBS1/PRPF40A/HNRNPA0/CDC5L/PRPF31/RBM22/SYNCRIP/MAGOHB/LGALS3/STRAP/SF3B5/PPP2R1A/SRSF7/PPIH/WTAP/HTATSF1/HNRNPM/HSPA1A/SNRPF/SFPQ/SNRPD3/PRPF38A/MPHOSPH10/POLR2L/WBP11/AHNAK2/PIK3R1/HNRNPR/NCL/CWC27/HNRNPUL1/SLU7/KDM1A/POLR2I/RTCB/FXR1/DNAJC8/…	125
BP	GO:0002478	antigen processing and presentation of exogenous peptide antigen	64/2365	177/18862	5.56045e-16	1.15696e-13	8.93304e-14	HLA-B/HLA-DRA/PSMB9/CD74/HLA-DRB1/HLA-DPA1/PSMB1/HLA-DPB1/TAP1/PSMB8/HLA-DMA/PSMA4/CTSL/B2M/CLTA/HLA-C/DCTN3/PSMC4/PSMA7/PSME2/HLA-E/PSME1/PSMD14/PSMA5/PSMB2/HLA-DMB/KIFAP3/HLA-DQB1/AP2S1/CTSD/PSMA3/TAP2/PSMD8/PSMD1/PSMD7/PSMD4/ITGAV/PSMA1/PSMD11/AP2M1/PSMC3/SEC24D/CAPZB/CTSV/KIF2A/CLTC/DYNC1LI2/PSMD6/PSMD2/HLA-F/SEC31A/SEC23A/LGMN/KIF2C/PSMD3/CAPZA1/ARF1/CYBA/CTSS/HLA-A/AP1S1/SEC13/CANX/AP2A1	64
BP	GO:0019884	antigen processing and presentation of exogenous antigen	65/2365	185/18862	1.67287e-15	3.3647e-13	2.59794e-13	HLA-B/HLA-DRA/PSMB9/CD74/HLA-DRB1/HLA-DPA1/PSMB1/HLA-DPB1/TAP1/PSMB8/HLA-DMA/PSMA4/CTSL/B2M/CLTA/HLA-C/DCTN3/PSMC4/PSMA7/PSME2/HLA-E/PSME1/PSMD14/PSMA5/PSMB2/HLA-DMB/KIFAP3/HLA-DQB1/AP2S1/CTSD/PSMA3/TAP2/PSMD8/PSMD1/PSMD7/PSMD4/ITGAV/PSMA1/PSMD11/AP2M1/PSMC3/SEC24D/CAPZB/CTSV/KIF2A/CLTC/DYNC1LI2/PSMD6/PSMD2/HLA-F/SEC31A/SEC23A/LGMN/KIF2C/PSMD3/CAPZA1/AP3D1/ARF1/CYBA/CTSS/HLA-A/AP1S1/SEC13/CANX/AP…	65
BP	GO:0016072	rRNA metabolic process	76/2365	238/18862	2.8533e-15	5.55381e-13	4.28818e-13	RPL5/RPS6/RPS19/RPS8/RPL11/FBL/RPL35A/RPS14/RPS9/RPS2/NOP58/EXOSC5/RPF2/NOP53/RPL10A/NOL8/IMP4/NIFK/RPP40/RPL26/RPS7/WDR12/GTPBP4/RCL1/RPS21/EXOSC3/DDX18/WDR3/PA2G4/XRN2/MPHOSPH10/DKC1/ERI3/WBP11/TRMT61B/RPL35/RPS16/WDR75/RPL14/SRFBP1/UTP11/UTP4/NOP56/WDR43/NOB1/RPF1/NVL/DCAF13/EXOSC9/RPL7L1/DDX27/EXOSC8/NOL10/BMS1/KRR1/BYSL/RPS25/MRTO4/RPP30/RPS28/GTF2H5/METTL5/RSL1D1/NSA2/DDX52/NOLC1/ISG20/SBDS…	76
BP	GO:0019882	antigen processing and presentation	75/2365	234/18862	3.47952e-15	6.56108e-13	5.06591e-13	HLA-B/HLA-DRA/PSMB9/AZGP1/CD74/HLA-DRB1/HLA-DPA1/PSMB1/HLA-DPB1/TAP1/PSMB8/HLA-DMA/PSMA4/CTSL/B2M/CLTA/HLA-C/DCTN3/PSMC4/PSMA7/PSME2/HLA-E/PSME1/PSMD14/PSMA5/RAB4A/PSMB2/HLA-DMB/KIFAP3/HLA-DQB1/AP2S1/CTSD/PSMA3/TAP2/PSMD8/CD68/PSMD1/PSMD7/TAPBPL/PSMD4/RAB34/ITGAV/PSMA1/PSMD11/AP2M1/GBA/ATG5/PSMC3/SEC24D/CAPZB/CTSV/KIF2A/CLTC/DYNC1LI2/PSMD6/PSMD2/HLA-F/SLC11A1/SEC31A/SEC23A/LGMN/KIF2C/PSMD3/CAPZA1…	75
BP	GO:0071456	cellular response to hypoxia	69/2365	206/18862	3.69553e-15	6.75722e-13	5.21736e-13	PSMB9/RPS27A/PSMB1/AQP3/ERO1A/PSMB8/PSMA4/BCL2/FAM162A/PTN/NOP53/PSMC4/NKX3-1/PSMA7/CA9/EIF4EBP1/PSME2/ENO1/PSME1/PSMD14/P4HB/PSMA5/EPAS1/PSMB2/BNIP3/CUL2/PSMA3/VEGFA/PSMD8/PHB2/TP53/SLC29A1/NDNF/PSMD1/AK4/PSMD7/EDN1/CHCHD2/PSMD4/PSMA1/PSMD11/PSMC3/SUV39H2/ADAM8/PDK1/NFE2L2/AKT1/PSMD6/PRKAA1/MYC/PSMD2/HIF1A/HP1BP3/NPEPPS/PSMD3/CCNB1/NOL3/EGR1/HYOU1/TMBIM6/VASN/MALAT1/NDRG1/ICAM1/MDM4/ELOC/HILPDA/…	69
BP	GO:0001666	response to hypoxia	97/2365	348/18862	8.51995e-15	1.51204e-12	1.16747e-12	PSMB9/CXCR4/RPS27A/PSMB1/AQP3/ERO1A/PSMB8/ANGPTL4/PSMA4/ASCL2/MYB/BCL2/FAM162A/PTN/NOP53/PSMC4/NKX3-1/PSMA7/CA9/CAV1/EIF4EBP1/PSME2/ENO1/ALKBH5/PSME1/ADA/PSMD14/P4HB/SLC2A1/PSMA5/PLAU/EPAS1/CD24/AHCY/PSMB2/BNIP3/LOXL2/CUL2/PML/ITGA2/PSMA3/UCP2/VEGFA/PSMD8/PHB2/TP53/ADAM15/SLC29A1/NDNF/PDLIM1/TXN2/PSMD1/AK4/PSMD7/EDN1/CHCHD2/PSMD4/PSMA1/PSMD11/PSMC3/SUV39H2/ANG/ADAM8/PDK1/NFE2L2/DDIT4/AKT1/PAM/PSM…	97
BP	GO:0070482	response to oxygen levels	104/2365	385/18862	8.86129e-15	1.52769e-12	1.17955e-12	PSMB9/CXCR4/HDAC2/RPS27A/PSMB1/AQP3/ERO1A/PSMB8/ANGPTL4/PSMA4/CDK4/ASCL2/MYB/BCL2/FAM162A/PTN/NOP53/PSMC4/NKX3-1/PSMA7/CA9/CAV1/EIF4EBP1/PSME2/ENO1/ALKBH5/PSME1/ADA/PSMD14/P4HB/SLC2A1/PSMA5/PLAU/EPAS1/CD24/AHCY/PSMB2/BNIP3/LOXL2/CUL2/PML/ITGA2/PSMA3/UCP2/VEGFA/PSMD8/PHB2/TP53/ADAM15/SLC29A1/NDNF/PDLIM1/TXN2/PSMD1/AK4/PSMD7/EDN1/CHCHD2/PSMD4/CYB5R4/PSMA1/PSMD11/PSMC3/SUV39H2/ANG/ADAM8/PDK1/NFE2L2/…	104
BP	GO:0061013	regulation of mRNA catabolic process	69/2365	210/18862	1.10268e-14	1.84822e-12	1.42704e-12	YBX1/PSMB9/NPM1/RPS27A/PSMB1/SERBP1/HSPB1/PSMB8/PSMA4/PAIP1/EXOSC5/PSMC4/PSMA7/ANP32A/YWHAB/BTG2/PSME2/ALKBH5/PSME1/PSMD14/EXOSC3/PSMA5/HNRNPA0/YTHDF2/SYNCRIP/PSMB2/HNRNPM/HSPA1A/PSMA3/PSMD8/HNRNPR/SCGB1A1/FXR1/YWHAZ/CNOT7/APEX1/HNRNPC/PSMD1/HSPA8/THRAP3/PSMD7/POLR2G/PSMD4/YBX3/PSMA1/PSMD11/ZFP36/EXOSC9/HNRNPU/PSMC3/EXOSC8/PKP3/FASTK/AKT1/PSMD6/PSMD2/CARHSP1/SLC11A1/DHX36/PNPT1/PSMD3/CELF1/SET/MA…	69
BP	GO:0071453	cellular response to oxygen levels	73/2365	231/18862	1.84536e-14	3.00943e-12	2.32363e-12	PSMB9/RPS27A/PSMB1/AQP3/ERO1A/PSMB8/PSMA4/BCL2/FAM162A/PTN/NOP53/PSMC4/NKX3-1/PSMA7/CA9/CAV1/EIF4EBP1/PSME2/ENO1/PSME1/PSMD14/P4HB/PSMA5/EPAS1/PSMB2/BNIP3/CUL2/PSMA3/VEGFA/PSMD8/PHB2/TP53/SLC29A1/NDNF/PSMD1/AK4/PSMD7/EDN1/CHCHD2/PSMD4/PSMA1/PSMD11/PSMC3/SUV39H2/ADAM8/PDK1/NFE2L2/ATP6V1G1/AKT1/PSMD6/PRKAA1/MYC/PSMD2/HIF1A/HP1BP3/NPEPPS/PSMD3/CCNB1/NOL3/EGR1/HYOU1/TMBIM6/VASN/MALAT1/ATP6V1A/NDRG1/I…	73
BP	GO:0036294	cellular response to decreased oxygen levels	69/2365	214/18862	3.17046e-14	5.03435e-12	3.8871e-12	PSMB9/RPS27A/PSMB1/AQP3/ERO1A/PSMB8/PSMA4/BCL2/FAM162A/PTN/NOP53/PSMC4/NKX3-1/PSMA7/CA9/EIF4EBP1/PSME2/ENO1/PSME1/PSMD14/P4HB/PSMA5/EPAS1/PSMB2/BNIP3/CUL2/PSMA3/VEGFA/PSMD8/PHB2/TP53/SLC29A1/NDNF/PSMD1/AK4/PSMD7/EDN1/CHCHD2/PSMD4/PSMA1/PSMD11/PSMC3/SUV39H2/ADAM8/PDK1/NFE2L2/AKT1/PSMD6/PRKAA1/MYC/PSMD2/HIF1A/HP1BP3/NPEPPS/PSMD3/CCNB1/NOL3/EGR1/HYOU1/TMBIM6/VASN/MALAT1/NDRG1/ICAM1/MDM4/ELOC/HILPDA/…	69
BP	GO:0043618	regulation of transcription from RNA polymerase II promoter in response to stress	45/2365	109/18862	4.66964e-14	7.22477e-12	5.57836e-12	PSMB9/RPS27A/PSMB1/MUC1/PSMB8/PSMA4/PSMC4/PSMA7/CA9/PSME2/PSME1/PSMD14/PSMA5/CHD6/EPAS1/JUN/PSMB2/CUL2/HSPA1A/PSMA3/VEGFA/PSMD8/TP53/PSMD1/PSMD7/DDIT3/PSMD4/ATF3/PSMA1/PSMD11/PSMC3/NFE2L2/DNAJB1/PSMD6/PSMD2/HIF1A/CEBPB/NCK1/PSMD3/EGR1/GCN1/TMBIM6/ELOC/EGLN3/HSPA5	45
BP	GO:0006979	response to oxidative stress	113/2365	444/18862	5.42781e-14	8.18785e-12	6.32197e-12	PSIP1/HDAC2/GPX4/NCOA7/S100A7/AKR1C3/HSPB1/PARP1/ERO1A/NDUFB4/RHOB/GPX2/MYB/BCL2/RACK1/NDUFS2/PCNA/ALDH3B1/MCTP1/ADAM9/ADA/APOD/P4HB/STAU1/SDC1/CHD6/DUSP1/MET/EPAS1/GCLC/JUN/ERCC1/BNIP3/HNRNPM/HSPA1A/PRDX2/GPX3/PML/BAK1/SFPQ/UCP2/GSTP1/DAPK1/FXN/SCGB1A1/ZNF580/SLC7A11/TP53/ZNF622/TRAP1/PDLIM1/APEX1/TXN2/RBPMS/PDCD10/GSR/PYCR2/PYROXD1/EDN1/CHCHD2/MAPK8/HYAL1/EZH2/TXNRD2/SELENOP/STK24/SOD1/PDK1/NDU…	113
BP	GO:0006119	oxidative phosphorylation	54/2365	148/18862	6.81318e-14	1.0027e-11	7.74201e-12	NUPR1/UQCRH/ATP5F1C/NDUFB4/NDUFA9/COX6B1/NDUFS2/SLC25A33/ATP5F1B/ATP5ME/ATP5PB/CHCHD10/COX7A2/MSH2/COX5A/STOML2/ATP5MC3/NDUFV3/NDUFB6/NDUFA4/FXN/ATP5F1A/VCP/NDUFS5/SHMT2/UQCRC2/NDUFS3/AK4/COA6/CHCHD2/UQCRFS1/NDUFS1/DNAJC15/SURF1/NDUFA2/NDUFA12/COX7A2L/COX5B/NDUFC1/NDUFS6/COX7B/CYC1/COX7C/NDUFA3/CDK1/CCNB1/NDUFC2/UQCR11/COX6A1/NDUFB5/NDUFS8/ATP5MG/NDUFB10/NDUFB1	54
BP	GO:0000375	RNA splicing, via transesterification reactions	102/2365	386/18862	7.42184e-14	1.06627e-11	8.23284e-12	YBX1/PSIP1/SNRPE/HNRNPF/HNRNPA3/HNRNPA1/SRRM1/SNRPD1/SNRPD2/ZMAT2/IK/U2SURP/SRSF3/RBM17/SRSF10/SF3A3/RBMX/CDC40/MAGOH/KHDRBS1/PRPF40A/HNRNPA0/CDC5L/PRPF31/RBM22/SYNCRIP/MAGOHB/STRAP/SF3B5/SRSF7/PPIH/WTAP/HTATSF1/HNRNPM/SNRPF/SFPQ/SNRPD3/PRPF38A/MPHOSPH10/POLR2L/WBP11/HNRNPR/NCL/CWC27/HNRNPUL1/SLU7/KDM1A/POLR2I/FXR1/DNAJC8/SNRPA/TIA1/SRPK1/SYF2/HNRNPC/HSPA8/THRAP3/CRNKL1/HNRNPK/POLR2G/RBMXL1/SF3B3…	102
BP	GO:0036293	response to decreased oxygen levels	97/2365	360/18862	8.45469e-14	1.18641e-11	9.16045e-12	PSMB9/CXCR4/RPS27A/PSMB1/AQP3/ERO1A/PSMB8/ANGPTL4/PSMA4/ASCL2/MYB/BCL2/FAM162A/PTN/NOP53/PSMC4/NKX3-1/PSMA7/CA9/CAV1/EIF4EBP1/PSME2/ENO1/ALKBH5/PSME1/ADA/PSMD14/P4HB/SLC2A1/PSMA5/PLAU/EPAS1/CD24/AHCY/PSMB2/BNIP3/LOXL2/CUL2/PML/ITGA2/PSMA3/UCP2/VEGFA/PSMD8/PHB2/TP53/ADAM15/SLC29A1/NDNF/PDLIM1/TXN2/PSMD1/AK4/PSMD7/EDN1/CHCHD2/PSMD4/PSMA1/PSMD11/PSMC3/SUV39H2/ANG/ADAM8/PDK1/NFE2L2/DDIT4/AKT1/PAM/PSM…	97
BP	GO:0006457	protein folding	72/2365	233/18862	9.88042e-14	1.32486e-11	1.02294e-11	DNAJA1/HSP90AB1/CD74/HSPD1/HSP90AA1/HSPB1/TCP1/ERO1A/FKBP4/HSPE1/B2M/CLGN/CCT2/CCT4/CCT3/HSPH1/PDCD5/P4HB/TTC1/QSOX1/CCT7/CCT5/HSPA9/PPIH/NUDC/DNAJC7/HSPA1A/PTGES3/ERP29/PFDN1/PDRG1/CSNK2B/CDC37L1/CWC27/RUVBL2/VCP/GNAI3/TBCC/TRAP1/PFDN4/HSPA8/VBP1/PDCL3/NFYC/PPIG/CCT8/CSNK2A1/DNAJB1/CRTAP/CLU/AMFR/GAK/HSPA6/SNRNP70/ST13/UBXN1/PDIA4/CHORDC1/PPIC/FKBP5/PRDX4/GANAB/PPIA/GRN/LMAN1/DNAJC3/SDF2/FKBP9/G…	72
BP	GO:0043620	regulation of DNA-templated transcription in response to stress	46/2365	115/18862	9.88044e-14	1.32486e-11	1.02294e-11	PSMB9/RPS27A/PSMB1/MUC1/PSMB8/PSMA4/PSMC4/PSMA7/CA9/PSME2/PSME1/PSMD14/PSMA5/CHD6/EPAS1/JUN/PSMB2/CUL2/HSPA1A/PSMA3/BCLAF1/VEGFA/PSMD8/TP53/PSMD1/PSMD7/DDIT3/PSMD4/ATF3/PSMA1/PSMD11/PSMC3/NFE2L2/DNAJB1/PSMD6/PSMD2/HIF1A/CEBPB/NCK1/PSMD3/EGR1/GCN1/TMBIM6/ELOC/EGLN3/HSPA5	46
BP	GO:0000377	RNA splicing, via transesterification reactions with bulged adenosine as nucleophile	101/2365	383/18862	1.13213e-13	1.45347e-11	1.12224e-11	YBX1/PSIP1/SNRPE/HNRNPF/HNRNPA3/HNRNPA1/SRRM1/SNRPD1/SNRPD2/ZMAT2/IK/U2SURP/SRSF3/RBM17/SRSF10/SF3A3/RBMX/CDC40/MAGOH/KHDRBS1/PRPF40A/HNRNPA0/CDC5L/PRPF31/RBM22/SYNCRIP/MAGOHB/STRAP/SF3B5/SRSF7/PPIH/WTAP/HTATSF1/HNRNPM/SNRPF/SFPQ/SNRPD3/PRPF38A/POLR2L/WBP11/HNRNPR/NCL/CWC27/HNRNPUL1/SLU7/KDM1A/POLR2I/FXR1/DNAJC8/SNRPA/TIA1/SRPK1/SYF2/HNRNPC/HSPA8/THRAP3/CRNKL1/HNRNPK/POLR2G/RBMXL1/SF3B3/ISY1/C1QB…	101
BP	GO:0000398	mRNA splicing, via spliceosome	101/2365	383/18862	1.13213e-13	1.45347e-11	1.12224e-11	YBX1/PSIP1/SNRPE/HNRNPF/HNRNPA3/HNRNPA1/SRRM1/SNRPD1/SNRPD2/ZMAT2/IK/U2SURP/SRSF3/RBM17/SRSF10/SF3A3/RBMX/CDC40/MAGOH/KHDRBS1/PRPF40A/HNRNPA0/CDC5L/PRPF31/RBM22/SYNCRIP/MAGOHB/STRAP/SF3B5/SRSF7/PPIH/WTAP/HTATSF1/HNRNPM/SNRPF/SFPQ/SNRPD3/PRPF38A/POLR2L/WBP11/HNRNPR/NCL/CWC27/HNRNPUL1/SLU7/KDM1A/POLR2I/FXR1/DNAJC8/SNRPA/TIA1/SRPK1/SYF2/HNRNPC/HSPA8/THRAP3/CRNKL1/HNRNPK/POLR2G/RBMXL1/SF3B3/ISY1/C1QB…	101
BP	GO:2001242	regulation of intrinsic apoptotic signaling pathway	56/2365	160/18862	1.7965e-13	2.25835e-11	1.74371e-11	DNAJA1/NUPR1/CD74/RPL11/MUC1/HSPB1/PARP1/IVNS1ABP/RNF183/BCL2/RACK1/NKX3-1/CAV1/RPL26/RPS7/ENO1/P4HB/ARHGEF2/NOC2L/HDAC1/FIS1/HSPA1A/ERP29/SFPQ/BCLAF1/PTTG1IP/S100A8/TP53/KDM1A/TRAP1/NDUFS3/HNRNPK/DDIT3/YBX3/SOD1/NFE2L2/AKT1/BAX/CLU/HIF1A/SELENOS/NCK1/NOL3/HYOU1/TMBIM6/STYXL1/MAGEA3/MIF/PTPMT1/PPIA/S100A9/TPT1/BCAP31/XBP1/TXNDC12/PLAUR	56
BP	GO:0043488	regulation of mRNA stability	62/2365	188/18862	2.03034e-13	2.50022e-11	1.93046e-11	YBX1/PSMB9/NPM1/RPS27A/PSMB1/SERBP1/HSPB1/PSMB8/PSMA4/PAIP1/EXOSC5/PSMC4/PSMA7/ANP32A/YWHAB/PSME2/ALKBH5/PSME1/PSMD14/EXOSC3/PSMA5/HNRNPA0/YTHDF2/SYNCRIP/PSMB2/HNRNPM/HSPA1A/PSMA3/PSMD8/HNRNPR/SCGB1A1/FXR1/YWHAZ/APEX1/HNRNPC/PSMD1/HSPA8/THRAP3/PSMD7/PSMD4/YBX3/PSMA1/PSMD11/ZFP36/EXOSC9/HNRNPU/PSMC3/EXOSC8/FASTK/AKT1/PSMD6/PSMD2/CARHSP1/SLC11A1/DHX36/PSMD3/CELF1/SET/MAPKAPK2/TAF15/ZFP36L2/PABPC4	62
BP	GO:0043487	regulation of RNA stability	64/2365	198/18862	2.36641e-13	2.85578e-11	2.20499e-11	YBX1/PSMB9/NPM1/RPS27A/PSMB1/SERBP1/HSPB1/PSMB8/PSMA4/PAIP1/EXOSC5/PSMC4/PSMA7/ANP32A/YWHAB/PSME2/ALKBH5/PSME1/PSMD14/EXOSC3/PSMA5/HNRNPA0/YTHDF2/SYNCRIP/PSMB2/HNRNPM/HSPA1A/PSMA3/PSMD8/DKC1/HNRNPR/SCGB1A1/ZCCHC17/FXR1/YWHAZ/APEX1/HNRNPC/PSMD1/HSPA8/THRAP3/PSMD7/PSMD4/YBX3/PSMA1/PSMD11/ZFP36/EXOSC9/HNRNPU/PSMC3/EXOSC8/FASTK/AKT1/PSMD6/PSMD2/CARHSP1/SLC11A1/DHX36/PSMD3/CELF1/SET/MAPKAPK2/TAF15/ZFP…	64
BP	GO:2001233	regulation of apoptotic signaling pathway	93/2365	348/18862	4.64959e-13	5.50111e-11	4.24749e-11	IFI6/DNAJA1/NUPR1/TPD52L1/CD74/FGB/RPL11/FGG/MUC1/FGA/HSPB1/PARP1/TNFSF10/IVNS1ABP/RNF183/BCL2/RACK1/NKX3-1/CAV1/RPL26/RPS7/ENO1/P4HB/EYA2/TGFBR1/LGALS3/ARHGEF2/NOC2L/HDAC1/TNFRSF12A/FIS1/HSPA1A/PRDX2/ERP29/PML/SFPQ/BCLAF1/PHIP/PTTG1IP/GSTP1/FXN/S100A8/TP53/KDM1A/SLC25A5/GNAI3/SP100/TRAP1/NDUFS3/CAAP1/HNRNPK/DDIT3/TMC8/EYA3/ITGAV/ATF3/YBX3/TMBIM1/PPP1CA/YAP1/SOD1/G0S2/NFE2L2/CSNK2A1/AKT1/BAX/CLU/…	93
BP	GO:0034976	response to endoplasmic reticulum stress	82/2365	296/18862	1.45682e-12	1.69047e-10	1.30524e-10	NUPR1/AGR2/ERO1A/CLGN/RNF183/BCL2/RACK1/CAV1/ABCA7/MYDGF/UBXN4/EXTL2/P4HB/JUN/KLHDC3/CREB3L2/FBXO2/HSPA1A/ERP29/PML/BAK1/YIF1A/PIK3R1/TP53/VCP/SEC61B/DDIT3/UFL1/ATF3/VAPB/TPP1/NPLOC4/RCN3/UBA5/PPP1R15A/SEC16A/MAN1B1/TMEM129/NFE2L2/CREB3L4/TMED2/BAX/CLU/PPP2CB/AMFR/SEC31A/CEBPB/KDELR3/UFC1/ATP2A2/ERLEC1/TMEM259/SRPRA/UBE2J1/SELENOS/UBXN1/NCK1/TMCO1/PDIA4/UBE2J2/HYOU1/EEF2/SHC1/TMBIM6/RHBDD2/CASP4/…	82
BP	GO:0002474	antigen processing and presentation of peptide antigen via MHC class I	40/2365	99/18862	2.71489e-12	3.09088e-10	2.38652e-10	HLA-B/PSMB9/AZGP1/PSMB1/TAP1/PSMB8/PSMA4/B2M/HLA-C/PSMC4/PSMA7/PSME2/HLA-E/PSME1/PSMD14/PSMA5/PSMB2/PSMA3/TAP2/PSMD8/PSMD1/PSMD7/TAPBPL/PSMD4/ITGAV/PSMA1/PSMD11/PSMC3/SEC24D/PSMD6/PSMD2/HLA-F/SEC31A/SEC23A/PSMD3/CYBA/HLA-A/BCAP31/SEC13/CANX	40
BP	GO:0051701	biological process involved in interaction with host	66/2365	219/18862	3.74478e-12	4.18445e-10	3.23088e-10	CXCR4/CD74/HLA-DRB1/LGALS9/TCP1/CTSL/TRIM22/IFITM3/LY6E/PLSCR1/EIF2AK2/RPSA/SNX3/CAV2/CAV1/DYNLT1/CD55/IFIT1/P4HB/VPS4B/CD81/RRAGA/MET/HSPA1A/PML/SIVA1/ITGA2/PHB2/LGALS1/CDH1/KPNA3/TMPRSS4/LAMP1/HYAL1/ITGB6/TNIP1/ITGAV/TRIM38/KRT6A/VAPB/SCARB2/ATG5/IFITM2/DAG1/CLDN1/RXRA/TYMS/WWP1/GSN/GRK2/EPHA2/PVR/CXADR/CDK1/XPR1/CTNND1/NECTIN2/HYAL2/ICAM1/PPIA/F11R/CHMP4C/BSG/CTNNB1/THOC6/CD46	66
BP	GO:0044409	entry into host	52/2365	153/18862	4.76368e-12	5.22619e-10	4.03523e-10	CXCR4/CD74/HLA-DRB1/LGALS9/CTSL/TRIM22/IFITM3/LY6E/PLSCR1/RPSA/SNX3/CAV2/CAV1/DYNLT1/CD55/P4HB/CD81/MET/HSPA1A/SIVA1/ITGA2/LGALS1/CDH1/KPNA3/TMPRSS4/LAMP1/HYAL1/ITGB6/ITGAV/TRIM38/KRT6A/SCARB2/IFITM2/DAG1/CLDN1/WWP1/GSN/GRK2/EPHA2/PVR/CXADR/CDK1/XPR1/CTNND1/NECTIN2/HYAL2/ICAM1/PPIA/F11R/BSG/CTNNB1/CD46	52
BP	GO:0071826	ribonucleoprotein complex subunit organization	68/2365	231/18862	5.88842e-12	6.34477e-10	4.8989e-10	RPL5/PSIP1/RPS19/RPL13A/HSP90AB1/RPL11/HSP90AA1/RPS14/XRCC5/SNRPE/RPSA/RPL24/RPS10/EIF3E/RPL10/EIF3M/SNRPD1/SNRPD2/BRIX1/RPF2/NOP53/SRSF10/SF3A3/RBMX/EIF3K/KIF5B/PRPF31/STRAP/SNRPF/PTGES3/RPS5/SNRPD3/EIF3D/SLU7/RUVBL2/RUVBL1/VCP/RPL3/SRPK1/CRNKL1/ISY1/SF3B1/CPSF6/LSM2/PRPF19/PRPF18/EIF3I/PUF60/USP39/MRPL20/RPL38/MRTO4/SNRPG/RPS28/SNRPC/EIF3L/PRPF6/EIF5/EIF3F/CDC73/CELF1/NOL3/EIF2S2/DENR/EIF3B/RPS…	68
BP	GO:0022900	electron transport chain	57/2365	178/18862	7.32588e-12	7.75515e-10	5.98787e-10	PHGDH/UQCRH/C15orf48/ASPH/IDO1/NDUFB4/NDUFA9/GPX2/COX6B1/NDUFS2/NDUFA4L2/COX7A2/COX5A/IDH3B/NDUFV3/LOXL2/SDHB/NDUFB6/NDUFA4/STEAP4/NDUFS5/UQCRC2/NDUFS3/GSR/COA6/CHCHD2/UQCRFS1/NDUFS1/DNAJC15/SURF1/NDUFA2/NDUFA12/COX7A2L/ETFRF1/COX5B/NDUFC1/NDUFS6/COX7B/CYC1/COX7C/GLRX/NDUFA3/CDK1/CCNB1/NDUFC2/UQCR11/CYBA/COX6A1/NDUFB5/NDUFS8/IMMP2L/FDX1/CYB5A/NDUFB10/ALDH2/NDUFB1/NQO2	57
BP	GO:0022618	ribonucleoprotein complex assembly	66/2365	224/18862	1.14934e-11	1.19571e-09	9.23229e-10	RPL5/PSIP1/RPS19/RPL13A/HSP90AB1/RPL11/HSP90AA1/RPS14/XRCC5/SNRPE/RPSA/RPL24/RPS10/EIF3E/RPL10/EIF3M/SNRPD1/SNRPD2/BRIX1/RPF2/NOP53/SRSF10/SF3A3/RBMX/EIF3K/PRPF31/STRAP/SNRPF/PTGES3/RPS5/SNRPD3/EIF3D/SLU7/RUVBL2/RUVBL1/RPL3/SRPK1/CRNKL1/ISY1/SF3B1/CPSF6/LSM2/PRPF19/PRPF18/EIF3I/PUF60/USP39/MRPL20/RPL38/MRTO4/SNRPG/RPS28/SNRPC/EIF3L/PRPF6/EIF5/EIF3F/CDC73/CELF1/NOL3/EIF2S2/DENR/EIF3B/RPS27/RRP7A/M…	66
BP	GO:0046034	ATP metabolic process	83/2365	313/18862	1.30008e-11	1.3296e-09	1.02661e-09	NUPR1/GAPDH/UQCRH/ATP5F1C/PARP1/AK2/NDUFB4/NDUFA9/OLA1/COX6B1/NDUFS2/TMSB4X/RAE1/SLC25A33/ENO1/TPI1/ATP5F1B/ATP5ME/NUDT5/ATP5PB/CHCHD10/COX7A2/MSH2/COX5A/STOML2/ATP5MC3/ATP5IF1/NDUFV3/FIS1/HSPA1A/NDUFB6/NDUFA4/FXN/ATP5F1A/TP53/VCP/NDUFS5/SHMT2/UQCRC2/NDUFS3/HSPA8/AK4/COA6/CHCHD2/UQCRFS1/NDUFS1/DNAJC15/TPR/GPI/SURF1/NUP62/ALDOA/NDUFA2/NDUFA12/DDIT4/COX7A2L/PRKAA1/ATP6V1B2/COX5B/NDUFC1/HIF1A/NDUFS6…	83
BP	GO:0042274	ribosomal small subunit biogenesis	33/2365	75/18862	1.35857e-11	1.36627e-09	1.05492e-09	RPS6/RPS19/RPS8/NPM1/RPS14/XRCC5/RPSA/RPS10/RPP40/RPS7/RCL1/RPS21/WDR3/RPS5/RPS16/SRFBP1/UTP4/NOB1/DCAF13/NOL10/BMS1/BYSL/RPL38/RPS25/RPS28/GTF2H5/DDX52/SNU13/FAM207A/RIOK3/RPS27/RRP7A/MRPS7	33
BP	GO:0042273	ribosomal large subunit biogenesis	32/2365	72/18862	1.99272e-11	1.97116e-09	1.52196e-09	RPL5/NPM1/RPL11/RPL35A/RPL24/RPL10/BRIX1/RPF2/NOP53/RPL10A/NIFK/RPL26/WDR12/GTPBP4/DDX18/PAK1IP1/NOC2L/RPL35/RPL3/ZNF622/RPL14/RPF1/NVL/RPL7L1/MRPL20/RPL38/MRTO4/RSL1D1/NOP16/NSA2/RPL26L1/SNU13	32
BP	GO:0045333	cellular respiration	58/2365	187/18862	2.07438e-11	2.01884e-09	1.55878e-09	UQCRH/IDH2/NDUFB4/NDUFA9/MDH1/SUCLG1/NOP53/COX6B1/NDUFS2/FH/OPN3/COX5A/IDH3B/BNIP3/NDUFV3/SDHB/NDUFB6/NDUFA4/FXN/IDH3G/VCP/NDUFS5/TRAP1/SHMT2/UQCRC2/NDUFS3/COA6/CHCHD2/UQCRFS1/NDUFS1/DNAJC15/SURF1/IDH3A/NDUFA2/NDUFA12/COX7A2L/ETFRF1/COX5B/NDUFC1/HIF1A/NDUFS6/COX7B/CYC1/COX7C/PNPT1/NDUFA3/CDK1/CISD1/CCNB1/NDUFC2/UQCR11/COX6A1/MTFR1/NDUFB5/NDUFS8/IMMP2L/NDUFB10/NDUFB1	58
BP	GO:0061418	regulation of transcription from RNA polymerase II promoter in response to hypoxia	33/2365	77/18862	3.25591e-11	3.11844e-09	2.4078e-09	PSMB9/RPS27A/PSMB1/PSMB8/PSMA4/PSMC4/PSMA7/CA9/PSME2/PSME1/PSMD14/PSMA5/EPAS1/PSMB2/CUL2/PSMA3/VEGFA/PSMD8/TP53/PSMD1/PSMD7/PSMD4/PSMA1/PSMD11/PSMC3/NFE2L2/PSMD6/PSMD2/HIF1A/PSMD3/EGR1/ELOC/EGLN3	33
BP	GO:0052126	movement in host environment	55/2365	175/18862	3.85457e-11	3.63414e-09	2.80597e-09	CXCR4/CD74/HLA-DRB1/LGALS9/CTSL/TRIM22/IFITM3/LY6E/PLSCR1/RPSA/SNX3/CAV2/CAV1/DYNLT1/CD55/P4HB/VPS4B/CD81/MET/HSPA1A/PML/SIVA1/ITGA2/LGALS1/CDH1/KPNA3/TMPRSS4/LAMP1/HYAL1/ITGB6/ITGAV/TRIM38/KRT6A/SCARB2/IFITM2/DAG1/CLDN1/WWP1/GSN/GRK2/EPHA2/PVR/CXADR/CDK1/XPR1/CTNND1/NECTIN2/HYAL2/ICAM1/PPIA/F11R/CHMP4C/BSG/CTNNB1/CD46	55
BP	GO:0006986	response to unfolded protein	57/2365	185/18862	4.13702e-11	3.84043e-09	2.96525e-09	DNAJA1/HSP90AB1/AGR2/HSPD1/HSP90AA1/HSPB1/ERO1A/HSPE1/CLGN/OPTN/RACK1/HSPH1/ABCA7/MYDGF/UBXN4/EXTL2/HSPA4/KLHDC3/CREB3L2/HSPA9/HSPA1A/BAK1/YIF1A/PIK3R1/VCP/HSPA8/DDIT3/UFL1/ATF3/VAPB/TPP1/PPP1R15A/TMEM129/NFE2L2/CREB3L4/TMED2/DNAJB1/BAX/AMFR/HSPA6/SEC31A/KDELR3/SRPRA/SELENOS/NCK1/UBE2J2/HYOU1/SHC1/TMBIM6/RHBDD2/JKAMP/DNAJC3/LMNA/CCND1/XBP1/CANX/HSPA5	57
BP	GO:0006414	translational elongation	46/2365	134/18862	5.43099e-11	4.96524e-09	3.83374e-09	EEF1A1/EIF5A/SRP9/RACK1/MRPL42/MRPS30/MRPL47/EEF1D/RPLP1/MRPS35/MRPL44/MRPS22/MRPL19/MRPL3/MRPL37/MRPS9/HBS1L/DAP3/MRPS26/MRPL41/MRPS10/MRPL22/PTCD3/MRPL20/MRPL57/MRPL40/MRPL30/MRPL9/MRPL36/MRPL16/AURKAIP1/RPLP2/MRPS18A/EEF1B2/EEF2/MRPL51/MRPL33/MRPS28/MRPS33/GADD45GIP1/USP16/MRPL52/MRPL54/MRPS7/SECISBP2/MRPL12	46
BP	GO:0031145	anaphase-promoting complex-dependent catabolic process	34/2365	83/18862	7.41205e-11	6.60084e-09	5.09661e-09	PSMB9/RPS27A/PSMB1/PSMB8/PSMA4/PSMC4/PSMA7/PSME2/PSME1/PSMD14/PSMA5/PSMB2/PSMA3/BUB3/PSMD8/FBXO5/PSMD1/PSMD7/PSMD4/PSMA1/PSMD11/PTTG1/PSMC3/ANAPC11/UBE2S/PSMD6/PSMD2/AURKA/PSMD3/CDK1/CCNB1/CDC20/CDC26/ANAPC16	34
BP	GO:0002479	antigen processing and presentation of exogenous peptide antigen via MHC class I, TAP-dependent	32/2365	75/18862	7.4388e-11	6.60084e-09	5.09661e-09	HLA-B/PSMB9/PSMB1/TAP1/PSMB8/PSMA4/B2M/HLA-C/PSMC4/PSMA7/PSME2/HLA-E/PSME1/PSMD14/PSMA5/PSMB2/PSMA3/TAP2/PSMD8/PSMD1/PSMD7/PSMD4/ITGAV/PSMA1/PSMD11/PSMC3/PSMD6/PSMD2/HLA-F/PSMD3/CYBA/HLA-A	32
BP	GO:0046718	viral entry into host cell	47/2365	140/18862	8.10291e-11	7.08594e-09	5.47117e-09	CXCR4/CD74/HLA-DRB1/LGALS9/CTSL/TRIM22/IFITM3/LY6E/PLSCR1/RPSA/SNX3/CAV2/CAV1/DYNLT1/CD55/P4HB/CD81/HSPA1A/SIVA1/ITGA2/LGALS1/KPNA3/TMPRSS4/LAMP1/HYAL1/ITGB6/ITGAV/TRIM38/SCARB2/IFITM2/DAG1/CLDN1/WWP1/GSN/GRK2/EPHA2/PVR/CXADR/CDK1/XPR1/NECTIN2/HYAL2/ICAM1/PPIA/F11R/BSG/CD46	47
BP	GO:1901991	negative regulation of mitotic cell cycle phase transition	69/2365	250/18862	1.02674e-10	8.85053e-09	6.83364e-09	PSMB9/CDKN2A/PSMB1/MUC1/SOX4/PSMB8/PSMA4/MAD2L2/TFDP2/CDK4/SFN/BCL2/IK/NOP53/PSMC4/PSMA7/PCNA/CDKN2B/BTG2/PSME2/RPL26/PSME1/PSMD14/PSMA5/DUSP1/NAE1/PSMB2/PML/PSMA3/BUB3/ZNF655/PRMT1/PSMD8/SKP1/TP53/FBXO5/CNOT7/SYF2/PSMD1/PSMD7/PSMD4/TTK/PSMA1/PSMD11/EZH2/TPR/PSMC3/BAX/PSMD6/PSMD2/AURKA/CENPF/CDK2AP2/CNOT2/RAD21/CDC73/PSMD3/CDK1/CCNB1/NABP2/JADE1/ARID3A/TNKS1BP1/CDC20/ZFP36L2/MDM4/CNOT11/CHMP4C/CC…	69
BP	GO:1903829	positive regulation of cellular protein localization	77/2365	295/18862	1.60922e-10	1.36761e-08	1.05596e-08	HSP90AB1/AGR2/TCP1/PARP1/PARP9/TFDP2/CCT2/CCT4/SFN/CCT3/RAN/BCL2/RACK1/PTN/SAE1/YWHAB/PDCD5/ABCA7/STOM/KIF5B/CCT7/CD81/RBM22/RDX/CCT5/RAB11A/LGALS3/ITGB2/YWHAQ/ITGA3/FIS1/VPS28/GPR137B/SQSTM1/CIB1/DKC1/PIK3R1/TP53/UBE2L3/YWHAZ/CDH1/YWHAE/MAPK8/CHP1/TPR/YAP1/CCT8/NUP62/HDAC3/ERBB2/AKT1/SPTBN1/PRKAA1/EPHA2/ARHGEF16/NIPBL/FZD5/FLNA/NMD3/NPEPPS/ABHD17C/CDK1/UBE2J2/MYO1C/TOMM7/UBL5/EZR/NPTN/HYAL2/PSEN…	77
BP	GO:0019079	viral genome replication	44/2365	129/18862	1.79564e-10	1.50485e-08	1.16192e-08	IFI16/IFI27/ISG15/MX1/LTF/IFITM3/PLSCR1/EIF2AK2/HACD3/NFIA/DEK/BCL2/SMARCB1/CDC42/STOM/NUCKS1/IFIT1/STAU1/PROX1/SLPI/PPIH/HTATSF1/OAS2/VCP/CNOT7/SRPK1/HSPA8/CTBP1/TNIP1/APOBEC3G/OAS1/VAPB/BST2/ATG5/IFITM2/ILF3/GRK2/FAM111A/ISG20/PPIA/PCBP2/TOP2A/RAB5A/PPIB	44
BP	GO:0062197	cellular response to chemical stress	86/2365	347/18862	2.45417e-10	2.02856e-08	1.56628e-08	DNAJA1/HDAC2/ERRFI1/NCOA7/AQP5/AKR1C3/HSPB1/PARP1/ERO1A/XRCC5/RHOB/GPX2/MYB/BCL2/RACK1/PCNA/CAV1/ALDH3B1/P4HB/STAU1/SLC2A1/CHD6/MET/EPAS1/JUN/ARHGEF2/BNIP3/HSPA1A/PRDX2/GPX3/PML/SFPQ/GSTP1/DAPK1/FXN/ZNF580/SLC7A11/TP53/ZNF622/TRAP1/APEX1/PDCD10/GSR/PYCR2/PYROXD1/CHCHD2/DDIT3/MAPK8/YBX3/EZH2/TXNRD2/STK24/ATG5/SOD1/PDK1/NFE2L2/FOXO3/AKT1/PRKAA1/PLEKHA1/HIF1A/OSER1/PYCR1/TPM1/ROMO1/NET1/ATP2A2/PRDX5…	86
BP	GO:1901990	regulation of mitotic cell cycle phase transition	102/2365	439/18862	2.83905e-10	2.31498e-08	1.78743e-08	PSMB9/CDKN2A/TUBA1A/TUBB/PSMB1/MUC1/HSP90AA1/SOX4/PSMB8/PSMA4/MAD2L2/TFDP2/CDK4/SFN/DCTN3/BCL2/IK/NOP53/ID2/PSMC4/PBX1/PSMA7/PCNA/CDKN2B/BTG2/PSME2/RPL26/PSME1/PSMD14/VPS4B/PSMA5/DUSP1/NAE1/RDX/RAB11A/PSMB2/PPP2R1A/HAUS6/PML/PSMA3/BUB3/ZNF655/PRMT1/PSMD8/SKP1/HAUS1/PHB2/TP53/FBXO5/PLCB1/CNOT7/APEX1/YWHAE/SYF2/PSMD1/PSMD7/CDC25B/PSMD4/HYAL1/TTK/PSMA1/PSMD11/EZH2/TPR/PLRG1/PSMC3/ANAPC11/AKT1/BAX/PS…	102
BP	GO:0061077	chaperone-mediated protein folding	28/2365	63/18862	3.57654e-10	2.87744e-08	2.22172e-08	CD74/HSPB1/ERO1A/FKBP4/HSPE1/CCT2/HSPH1/PDCD5/HSPA9/DNAJC7/HSPA1A/PTGES3/TRAP1/HSPA8/PDCL3/CSNK2A1/DNAJB1/CRTAP/CLU/GAK/HSPA6/ST13/PDIA4/CHORDC1/FKBP5/SDF2/PPIB/HSPA5	28
BP	GO:0035966	response to topologically incorrect protein	59/2365	206/18862	4.80273e-10	3.80259e-08	2.93604e-08	DNAJA1/HSP90AB1/AGR2/HSPD1/HSP90AA1/HSPB1/ERO1A/HSPE1/CLGN/OPTN/RACK1/HSPH1/ABCA7/MYDGF/UBXN4/EXTL2/HSPA4/KLHDC3/CREB3L2/HSPA9/HSPA1A/BAK1/YIF1A/PIK3R1/VCP/HSPA8/DDIT3/UFL1/ATF3/VAPB/TPP1/PPP1R15A/TMEM129/NFE2L2/CREB3L4/TMED2/DNAJB1/BAX/CLU/AMFR/HSPA6/SEC31A/KDELR3/SRPRA/SELENOS/NCK1/UBE2J2/HYOU1/SHC1/TMBIM6/RHBDD2/JKAMP/DNAJC3/UFD1/LMNA/CCND1/XBP1/CANX/HSPA5	59
BP	GO:0070125	mitochondrial translational elongation	34/2365	88/18862	4.85249e-10	3.80259e-08	2.93604e-08	MRPL42/MRPS30/MRPL47/MRPS35/MRPL44/MRPS22/MRPL19/MRPL3/MRPL37/MRPS9/DAP3/MRPS26/MRPL41/MRPS10/MRPL22/PTCD3/MRPL20/MRPL57/MRPL40/MRPL30/MRPL9/MRPL36/MRPL16/AURKAIP1/MRPS18A/MRPL51/MRPL33/MRPS28/MRPS33/GADD45GIP1/MRPL52/MRPL54/MRPS7/MRPL12	34
BP	GO:0042590	antigen processing and presentation of exogenous peptide antigen via MHC class I	32/2365	80/18862	5.52389e-10	4.27322e-08	3.29942e-08	HLA-B/PSMB9/PSMB1/TAP1/PSMB8/PSMA4/B2M/HLA-C/PSMC4/PSMA7/PSME2/HLA-E/PSME1/PSMD14/PSMA5/PSMB2/PSMA3/TAP2/PSMD8/PSMD1/PSMD7/PSMD4/ITGAV/PSMA1/PSMD11/PSMC3/PSMD6/PSMD2/HLA-F/PSMD3/CYBA/HLA-A	32
BP	GO:0043903	regulation of biological process involved in symbiotic interaction	57/2365	197/18862	6.16134e-10	4.70602e-08	3.63359e-08	IFI16/STAT1/ISG15/MX1/CXCR4/CD74/HLA-DRB1/LGALS9/LTF/TRIM22/IFITM3/LY6E/PLSCR1/EIF2AK2/HACD3/BCL2/SNX3/NELFCD/CAV2/CAV1/DYNLT1/IFIT1/P4HB/VPS4B/STAU1/PROX1/SLPI/PPIH/PML/POLR2L/OAS2/POLR2I/LGALS1/CNOT7/SRPK1/TMPRSS4/POLR2G/TNIP1/ITGAV/APOBEC3G/OAS1/TRIM38/KRT6A/ZFP36/VAPB/BST2/IFITM2/ILF3/GSN/FAM111A/NELFA/NECTIN2/ISG20/PPIA/CHMP4C/TOP2A/POLR2J	57
BP	GO:0070126	mitochondrial translational termination	34/2365	89/18862	6.91227e-10	5.21358e-08	4.02549e-08	MRPL42/MRPS30/MRPL47/MRPS35/MRPL44/MRPS22/MRPL19/MRPL3/MRPL37/MRPS9/DAP3/MRPS26/MRPL41/MRPS10/MRPL22/PTCD3/MRPL20/MRPL57/MRPL40/MRPL30/MRPL9/MRPL36/MRPL16/AURKAIP1/MRPS18A/MRPL51/MRPL33/MRPS28/MRPS33/GADD45GIP1/MRPL52/MRPL54/MRPS7/MRPL12	34
BP	GO:0015980	energy derivation by oxidation of organic compounds	72/2365	278/18862	9.11027e-10	6.78659e-08	5.24004e-08	UQCRH/IDH2/NDUFB4/NDUFA9/MDH1/SUCLG1/NOP53/COX6B1/NDUFS2/FH/PPP1CC/HMGB1/OPN3/COX5A/IDH3B/GYG1/BNIP3/NDUFV3/SDHB/NDUFB6/NDUFA4/FXN/TP53/IDH3G/VCP/NDUFS5/TRAP1/SHMT2/UQCRC2/NDUFS3/COA6/CHCHD2/UQCRFS1/NDUFS1/DNAJC15/SURF1/IDH3A/IRS1/PPP1CA/PPP1CB/NDUFA2/NDUFA12/COX7A2L/ETFRF1/AKT1/MYC/COX5B/NDUFC1/HIF1A/NDUFS6/PYGL/COX7B/CYC1/COX7C/PNPT1/SELENOS/NDUFA3/CDK1/CISD1/CCNB1/NDUFC2/IRS2/PHLDA2/UQCR11/COX…	72
BP	GO:2000736	regulation of stem cell differentiation	39/2365	112/18862	9.65935e-10	7.10787e-08	5.4881e-08	PSMB9/PSMB1/PSMB8/TACSTD2/PSMA4/EIF2AK2/MYB/PTN/PSMC4/PSMA7/PSME2/PSME1/PSMD14/PSMA5/YTHDF2/PWP1/SOX9/PSMB2/HSPA9/PSMA3/PSMD8/PSMD1/PSMD7/TEAD2/PSMD4/PSMA1/PSMD11/YAP1/HNRNPU/PSMC3/NFE2L2/PSMD6/PSMD2/DHX36/HES1/PSMD3/ZFP36L2/LTBP3/RUNX1	39
BP	GO:0043161	proteasome-mediated ubiquitin-dependent protein catabolic process	98/2365	425/18862	9.78532e-10	7.11381e-08	5.49268e-08	PSMB9/IFI27/HSP90AB1/RPL11/RPS27A/PSMB1/PSMB8/PSMA4/RACK1/NOP53/PLAA/PSMC4/PSMA7/CAV1/PSME2/UBXN4/PSME1/PSMD14/PSMA5/SDCBP/SMARCC1/PSMB2/FBXO2/DESI1/CUL2/HSPA1A/PML/PSMA3/BUB3/SPSB2/PSMD8/SKP1/FBXW5/CSNK1A1/VCP/FBXO5/SEC61B/PSMD1/PSMD7/DDIT3/PSMD4/TOPORS/UFL1/PSMA1/PSMD11/GID8/PTTG1/GBA/WAC/NUB1/NPLOC4/PSMC3/SUMO1/ANAPC11/UBE2S/MAN1B1/TMEM129/NFE2L2/CRBN/AKT1/CLU/PSMD6/PPP2CB/WWP1/AMFR/SMURF1/PSM…	98
BP	GO:1901988	negative regulation of cell cycle phase transition	70/2365	268/18862	1.05077e-09	7.54805e-08	5.82797e-08	PSMB9/CDKN2A/PSMB1/MUC1/SOX4/PSMB8/PSMA4/MAD2L2/TFDP2/CDK4/SFN/BCL2/IK/NOP53/PSMC4/PSMA7/PCNA/CDKN2B/BTG2/PSME2/RPL26/PSME1/PSMD14/PSMA5/DUSP1/NAE1/PSMB2/PML/PSMA3/BUB3/ZNF655/PRMT1/PSMD8/SKP1/TP53/FBXO5/CNOT7/SYF2/PSMD1/PSMD7/PSMD4/TTK/PSMA1/PSMD11/EZH2/TPR/PSMC3/BABAM2/BAX/PSMD6/PSMD2/AURKA/CENPF/CDK2AP2/CNOT2/RAD21/CDC73/PSMD3/CDK1/CCNB1/NABP2/JADE1/ARID3A/TNKS1BP1/CDC20/ZFP36L2/MDM4/CNOT11/CH…	70
BP	GO:0000086	G2/M transition of mitotic cell cycle	68/2365	258/18862	1.20302e-09	8.54002e-08	6.59389e-08	PSMB9/TUBA1A/TPD52L1/TUBB/PSMB1/HSP90AA1/PSMB8/PSMA4/CDK4/OPTN/DCTN3/NOP53/PSMC4/PBX1/PSMA7/CDKN2B/PSME2/CCDC57/PSME1/PSMD14/VPS4B/KHDRBS1/PSMA5/NAE1/RAB11A/PSMB2/PPP2R1A/HAUS6/PSMA3/PSMD8/SKP1/HAUS1/FBXO5/PLCB1/CALM3/YWHAE/SYF2/PSMD1/PSMD7/PPP1R12A/CDC25B/CCNH/PSMD4/PSMA1/PSMD11/PPP1CB/PSMC3/PSMD6/CEP57/SSNA1/PSMD2/AURKA/CENPF/ENSA/RAD21/PSMD3/CDK1/CCNB1/NABP2/CSNK1E/MELK/AKAP9/HMMR/TPX2/YWHAG/C…	68
BP	GO:0070585	protein localization to mitochondrion	46/2365	146/18862	1.36757e-09	9.59527e-08	7.40866e-08	DNAJA1/HSPD1/HSP90AA1/TFDP2/SFN/BCL2/SAE1/YWHAB/PDCD5/SLC25A6/HSPA4/ATP5IF1/YWHAQ/MTCH2/FIS1/TOMM20/TP53/UBE2L3/YWHAZ/CALM3/YWHAE/TIMM10/DDIT3/BCS1L/MAPK8/TIMM17A/DNAJC15/TIMM17B/TIMM50/AKT1/BAX/PRKAA1/ROMO1/FZD5/TOMM5/NPEPPS/UBE2J2/TOMM7/UBL5/IMMP2L/LMAN1/LEPROT/TIMM8B/TSPO/YWHAG/BCAP31	46
BP	GO:0042773	ATP synthesis coupled electron transport	36/2365	100/18862	1.49341e-09	1.03578e-07	7.9974e-08	UQCRH/NDUFB4/NDUFA9/COX6B1/NDUFS2/COX5A/NDUFV3/NDUFB6/NDUFA4/NDUFS5/UQCRC2/NDUFS3/COA6/CHCHD2/UQCRFS1/NDUFS1/DNAJC15/NDUFA2/NDUFA12/COX7A2L/COX5B/NDUFC1/NDUFS6/COX7B/CYC1/COX7C/NDUFA3/CDK1/CCNB1/NDUFC2/UQCR11/COX6A1/NDUFB5/NDUFS8/NDUFB10/NDUFB1	36
BP	GO:0050792	regulation of viral process	54/2365	186/18862	1.51089e-09	1.03599e-07	7.99904e-08	IFI16/STAT1/ISG15/MX1/CXCR4/CD74/HLA-DRB1/LGALS9/LTF/TRIM22/IFITM3/LY6E/PLSCR1/EIF2AK2/HACD3/BCL2/SNX3/NELFCD/CAV2/DYNLT1/IFIT1/P4HB/VPS4B/STAU1/PROX1/SLPI/PPIH/PML/POLR2L/OAS2/POLR2I/LGALS1/CNOT7/SRPK1/TMPRSS4/POLR2G/TNIP1/APOBEC3G/OAS1/TRIM38/ZFP36/VAPB/BST2/IFITM2/ILF3/GSN/FAM111A/NELFA/NECTIN2/ISG20/PPIA/CHMP4C/TOP2A/POLR2J	54
BP	GO:0044839	cell cycle G2/M phase transition	71/2365	276/18862	1.63129e-09	1.10598e-07	8.53946e-08	PSMB9/TUBA1A/TPD52L1/TUBB/NPM1/PSMB1/HSP90AA1/PSMB8/PSMA4/CDK4/OPTN/DCTN3/NOP53/PSMC4/PBX1/PSMA7/CDKN2B/PSME2/CCDC57/PSME1/PSMD14/VPS4B/KHDRBS1/PSMA5/NAE1/RAB11A/PSMB2/PPP2R1A/HAUS6/PSMA3/PSMD8/SKP1/HAUS1/TP53/FBXO5/PLCB1/CALM3/YWHAE/SYF2/PSMD1/PSMD7/PPP1R12A/CDC25B/CCNH/PSMD4/PSMA1/PSMD11/PPP1CB/PSMC3/BABAM2/PSMD6/CEP57/SSNA1/PSMD2/AURKA/CENPF/ENSA/RAD21/PSMD3/CDK1/CCNB1/NABP2/CSNK1E/MELK/AKAP9/…	71
BP	GO:0072655	establishment of protein localization to mitochondrion	45/2365	142/18862	1.67371e-09	1.12213e-07	8.66416e-08	DNAJA1/HSPD1/HSP90AA1/TFDP2/SFN/BCL2/SAE1/YWHAB/PDCD5/SLC25A6/HSPA4/ATP5IF1/YWHAQ/FIS1/TOMM20/TP53/UBE2L3/YWHAZ/CALM3/YWHAE/TIMM10/DDIT3/BCS1L/MAPK8/TIMM17A/DNAJC15/TIMM17B/TIMM50/AKT1/BAX/PRKAA1/ROMO1/FZD5/TOMM5/NPEPPS/UBE2J2/TOMM7/UBL5/IMMP2L/LMAN1/LEPROT/TIMM8B/TSPO/YWHAG/BCAP31	45
BP	GO:0006415	translational termination	37/2365	105/18862	1.7677e-09	1.17212e-07	9.05013e-08	EIF5A/MRPL42/MRPS30/MRPL47/ETF1/MRPS35/MRPL44/MRPS22/MRPL19/MRPL3/MRPL37/MRPS9/DAP3/MRPS26/MRPL41/MRPS10/MRPL22/PTCD3/MRPL20/MRPL57/MRPL40/MRPL30/MRPL9/MRPL36/MRPL16/AURKAIP1/MRPS18A/MRPL51/MRPL33/MRPS28/TRMT112/MRPS33/GADD45GIP1/MRPL52/MRPL54/MRPS7/MRPL12	37
BP	GO:0060218	hematopoietic stem cell differentiation	33/2365	88/18862	2.1435e-09	1.40586e-07	1.08548e-07	PSMB9/PSMB1/PSMB8/PSMA4/XRCC5/EIF2AK2/MYB/PSMC4/PSMA7/PSME2/PSME1/PSMD14/PSMA5/YTHDF2/PSMB2/HSPA9/PSMA3/PSMD8/TP53/PSMD1/PSMD7/PSMD4/UFL1/PSMA1/PSMD11/YAP1/PSMC3/BATF/NFE2L2/PSMD6/PSMD2/PSMD3/RUNX1	33
BP	GO:0032984	protein-containing complex disassembly	80/2365	328/18862	2.2935e-09	1.48806e-07	1.14896e-07	STMN1/EIF5A/MRPL42/SMARCB1/HMGA1/CAV1/VPS4B/KIF5B/MRPS30/MRPL47/RDX/SMARCC1/ARHGEF2/BNIP3/SVIL/CIB1/ETF1/MRPS35/MRPL44/MRPS22/MRPL19/CSNK1A1/VCP/MRPL3/HSPA8/MRPL37/MRPS9/DAP3/MRPS26/MRPL41/GBA/PPP1CA/SMARCA4/MRPS10/VTA1/CAPZB/MRPL22/PTCD3/MRPL20/DDIT4/MRPL57/KIF2A/SPTBN1/MRPL40/MRPL30/MRPL9/GSN/MYC/MRPL36/MRPL16/GAK/AURKAIP1/FZD5/ADD3/MRPS18A/IGF1R/KIF2C/CAPZA1/SET/FLII/DVL1/LIMA1/MRPL51/MRPL33/M…	80
BP	GO:0072331	signal transduction by p53 class mediator	68/2365	263/18862	2.86186e-09	1.83707e-07	1.41843e-07	RPL5/IFI16/NUPR1/CD74/HDAC2/RPL11/MUC1/SOX4/TFDP2/SFN/BCL2/RPF2/NOP53/PCNA/BTG2/RPL26/RPS7/PAK1IP1/MSH2/NOC2L/HDAC1/RAD1/TP53RK/ING4/MEAF6/PML/CSNK2B/PRMT1/PTTG1IP/EHMT2/TAF11/TP53/KDM1A/SP100/BARD1/CNOT7/HNRNPK/TOPORS/SSRP1/MYO6/RBBP4/BATF/RFC4/TAF7/DDIT4/CSNK2A1/AKT1/BAX/PHF20/PRKAA1/HINT1/AURKA/DDX5/RFC3/CNOT2/CDK1/CCNB1/TAF15/SHISA5/ARID3A/TNKS1BP1/MIF/NDRG1/TPX2/MDM4/CNOT11/TAF6/PERP	68
BP	GO:0006839	mitochondrial transport	70/2365	274/18862	2.90797e-09	1.84702e-07	1.42611e-07	HSPD1/HSP90AA1/ATP5F1C/TFDP2/SFN/BCL2/SAE1/YWHAB/PDCD5/SLC25A33/DYNLT1/SLC25A6/ATP5F1B/ATP5ME/EYA2/ATP5PB/CHCHD10/STOML2/HSPA4/ATP5MC3/ATP5IF1/BNIP3/YWHAQ/FIS1/HSPA1A/MPC1/BAK1/UCP2/TOMM20/VDAC1/ATP5F1A/TP53/CNP/SLC25A5/UBE2L3/YWHAZ/SLC25A1/YWHAE/TIMM10/BCS1L/MAPK8/TIMM17A/DNAJC15/TIMM17B/HEBP2/TIMM50/BAX/PRKAA1/ROMO1/FZD5/TOMM5/PNPT1/NPEPPS/UBE2J2/NOL3/TOMM7/UBL5/IMMP2L/RTL10/PSEN1/SLC39A8/LMAN1…	70
BP	GO:0051169	nuclear transport	82/2365	343/18862	3.94641e-09	2.48048e-07	1.91522e-07	PSIP1/IFI27/HSP90AB1/NPM1/EIF5A/SNRPE/SSB/HNRNPA1/SFN/SRRM1/SNRPD1/RAN/SNRPD2/SRSF3/ANP32A/RAE1/ANGPT1/HMGA1/PPP1CC/ALKBH5/CDC40/MAGOH/APOD/CSE1L/KHDRBS1/RBM22/MAGOHB/SRSF7/HSPA9/DESI1/SNRPF/PML/SNRPD3/PTTG1IP/PKIG/PIK3R1/SLU7/PHB2/TP53/SP100/BARD1/CDH1/KPNA3/YWHAE/PPP1R12A/CHP1/PHAX/TPR/SRSF2/IPO9/CPSF6/NUP62/HDAC3/DDX39A/AKT1/SNRPG/NCBP2/RBM8A/UPF2/SMURF1/SRSF4/HNRNPA2B1/RPAIN/FLNA/SRSF11/NMD3/…	82
BP	GO:0022904	respiratory electron transport chain	39/2365	117/18862	4.04725e-09	2.51764e-07	1.94391e-07	UQCRH/NDUFB4/NDUFA9/COX6B1/NDUFS2/COX5A/NDUFV3/SDHB/NDUFB6/NDUFA4/NDUFS5/UQCRC2/NDUFS3/COA6/CHCHD2/UQCRFS1/NDUFS1/DNAJC15/NDUFA2/NDUFA12/COX7A2L/ETFRF1/COX5B/NDUFC1/NDUFS6/COX7B/CYC1/COX7C/NDUFA3/CDK1/CCNB1/NDUFC2/UQCR11/COX6A1/NDUFB5/NDUFS8/IMMP2L/NDUFB10/NDUFB1	39
BP	GO:0045930	negative regulation of mitotic cell cycle	78/2365	321/18862	4.34364e-09	2.66214e-07	2.05548e-07	PSMB9/CDKN2A/BTG1/PSMB1/MUC1/SOX4/PSMB8/PSMA4/MAD2L2/TFDP2/CDK4/SFN/BCL2/IK/NOP53/PSMC4/NKX3-1/PSMA7/PCNA/CDKN2B/BTG2/PSME2/RPL26/PSME1/PSMD14/PSMA5/DUSP1/NAE1/MSH2/PSMB2/PML/PSMA3/BUB3/ZNF655/MCPH1/PRMT1/PSMD8/SKP1/TP53/FBXO5/CNOT7/TIMP2/SYF2/PSMD1/PSMD7/PSMD4/TTK/PSMA1/PSMD11/EZH2/TPR/PSMC3/BAX/PSMD6/PSMD2/AURKA/AURKAIP1/CENPF/PNPT1/CDK2AP2/CNOT2/RAD21/CDC73/PSMD3/CDK1/CCNB1/NABP2/JADE1/ARID3A/…	78
BP	GO:0042775	mitochondrial ATP synthesis coupled electron transport	35/2365	99/18862	4.36777e-09	2.66214e-07	2.05548e-07	UQCRH/NDUFB4/NDUFA9/COX6B1/NDUFS2/COX5A/NDUFV3/NDUFB6/NDUFA4/NDUFS5/UQCRC2/NDUFS3/CHCHD2/UQCRFS1/NDUFS1/DNAJC15/NDUFA2/NDUFA12/COX7A2L/COX5B/NDUFC1/NDUFS6/COX7B/CYC1/COX7C/NDUFA3/CDK1/CCNB1/NDUFC2/UQCR11/COX6A1/NDUFB5/NDUFS8/NDUFB10/NDUFB1	35
BP	GO:0034599	cellular response to oxidative stress	74/2365	299/18862	4.63302e-09	2.79037e-07	2.15449e-07	HDAC2/NCOA7/AKR1C3/HSPB1/PARP1/ERO1A/RHOB/GPX2/MYB/BCL2/RACK1/PCNA/ALDH3B1/P4HB/STAU1/CHD6/MET/EPAS1/JUN/BNIP3/HSPA1A/PRDX2/GPX3/PML/SFPQ/GSTP1/DAPK1/FXN/ZNF580/SLC7A11/TP53/ZNF622/TRAP1/APEX1/PDCD10/GSR/PYCR2/PYROXD1/CHCHD2/MAPK8/EZH2/TXNRD2/STK24/SOD1/PDK1/NFE2L2/FOXO3/AKT1/PRKAA1/PLEKHA1/HIF1A/OSER1/PYCR1/TPM1/ROMO1/NET1/ATP2A2/PRDX5/PNPT1/PRDX1/SELENOS/ARL6IP5/VRK2/ANXA1/NOL3/MAPK3/MELK/CYBA/…	74
BP	GO:0002244	hematopoietic progenitor cell differentiation	48/2365	161/18862	4.67066e-09	2.79037e-07	2.15449e-07	PSMB9/PSMB1/SOX4/PSMB8/PSMA4/XRCC5/EIF2AK2/MYB/BCL2/PDCD2/PSMC4/PSMA7/MLF1/PSME2/PSME1/PSMD14/AGPAT5/PSMA5/YTHDF2/PSMB2/HSPA9/FSTL3/PSMA3/PSMD8/TP53/PSMD1/PSMD7/PSMD4/UFL1/PSMA1/PSMD11/YAP1/PSMC3/BATF/NFE2L2/PSMD6/PSMD2/PRRC2C/DHX36/HES1/PSMD3/EEF2/HYAL2/SBDS/PSEN1/RUNX1/TOP2A/RBM47	48
BP	GO:1904951	positive regulation of establishment of protein localization	79/2365	328/18862	5.30306e-09	3.11685e-07	2.40657e-07	HSP90AB1/HLA-DRB1/FGB/FGG/FGA/SOX4/TCP1/TFDP2/OXCT1/CCT2/CCT4/SFN/CCT3/SRI/RAN/BCL2/RACK1/SAE1/PHPT1/YWHAB/PDCD5/CDC42/STOM/ADAM9/KIF5B/CCT7/CD81/RBM22/CCT5/ITGB2/YWHAQ/FIS1/VPS28/VSNL1/CIB1/OAZ2/DKC1/PIK3R1/TP53/UBE2L3/YWHAZ/CDH1/YWHAE/PDCD10/GOLPH3L/MAPK8/CHP1/TPR/TMED10/CCT8/ANG/ADAM8/HDAC3/SEC16A/ERBB2/PRKAA1/HIF1A/OAZ1/FZD5/FLNA/NPEPPS/UBE2J2/MYO1C/ARF1/TOMM7/IRS2/UBL5/EZR/HYAL2/PSEN1/PPIA/L…	79
BP	GO:0008637	apoptotic mitochondrial changes	39/2365	118/18862	5.32045e-09	3.11685e-07	2.40657e-07	IFI6/HSPD1/TNFSF10/TFDP2/SFN/BCL2/FAM162A/YWHAB/PDCD5/EYA2/CHCHD10/JUN/ATP5IF1/BNIP3/YWHAQ/FIS1/HSPA1A/BAK1/FXN/IFIT2/TP53/SLC25A5/YWHAZ/YWHAE/MAPK8/NDUFS1/TIMM50/AKT1/BAX/CLU/PPP2CB/GGCT/GCLM/NOL3/BIK/RTL10/HIP1R/YWHAG/PLAUR	39
BP	GO:0010389	regulation of G2/M transition of mitotic cell cycle	56/2365	203/18862	5.90574e-09	3.42647e-07	2.64563e-07	PSMB9/TUBA1A/TUBB/PSMB1/HSP90AA1/PSMB8/PSMA4/CDK4/DCTN3/NOP53/PSMC4/PBX1/PSMA7/PSME2/PSME1/PSMD14/VPS4B/PSMA5/NAE1/RAB11A/PSMB2/PPP2R1A/HAUS6/PSMA3/PSMD8/SKP1/HAUS1/FBXO5/YWHAE/SYF2/PSMD1/PSMD7/CDC25B/PSMD4/PSMA1/PSMD11/PSMC3/PSMD6/CEP57/SSNA1/PSMD2/AURKA/CENPF/RAD21/PSMD3/CDK1/CCNB1/NABP2/CSNK1E/AKAP9/HMMR/TPX2/YWHAG/CHMP4C/CSNK1D/CCND1	56
BP	GO:1902749	regulation of cell cycle G2/M phase transition	59/2365	219/18862	6.14523e-09	3.50779e-07	2.70842e-07	PSMB9/TUBA1A/TUBB/NPM1/PSMB1/HSP90AA1/PSMB8/PSMA4/CDK4/DCTN3/NOP53/PSMC4/PBX1/PSMA7/PSME2/PSME1/PSMD14/VPS4B/PSMA5/NAE1/RAB11A/PSMB2/PPP2R1A/HAUS6/PSMA3/PSMD8/SKP1/HAUS1/TP53/FBXO5/YWHAE/SYF2/PSMD1/PSMD7/CDC25B/PSMD4/PSMA1/PSMD11/PSMC3/BABAM2/PSMD6/CEP57/SSNA1/PSMD2/AURKA/CENPF/RAD21/PSMD3/CDK1/CCNB1/NABP2/CSNK1E/AKAP9/HMMR/TPX2/YWHAG/CHMP4C/CSNK1D/CCND1	59
BP	GO:1902036	regulation of hematopoietic stem cell differentiation	29/2365	74/18862	6.16217e-09	3.50779e-07	2.70842e-07	PSMB9/PSMB1/PSMB8/PSMA4/EIF2AK2/MYB/PSMC4/PSMA7/PSME2/PSME1/PSMD14/PSMA5/YTHDF2/PSMB2/HSPA9/PSMA3/PSMD8/PSMD1/PSMD7/PSMD4/PSMA1/PSMD11/YAP1/PSMC3/NFE2L2/PSMD6/PSMD2/PSMD3/RUNX1	29
BP	GO:0034248	regulation of cellular amide metabolic process	107/2365	494/18862	6.82833e-09	3.85067e-07	2.97316e-07	YBX1/RPL5/RPL13A/GAPDH/NPM1/PUM3/EIF5A/SOX4/RPS14/HSPB1/SHMT1/RPS9/EIF2AK2/CDK4/SRP9/EIF3E/RPL10/PAIP1/RACK1/EIF4EBP1/BTG2/ABCA7/RPL26/LSM14A/MAGOH/EIF3K/KHDRBS1/RPL22/EIF2A/PA2G4/YTHDF2/CSDE1/CAPRIN1/SYNCRIP/CDC123/LARP6/PLXNB2/ITGA2/CNBP/ETF1/RMND1/DAPK1/HNRNPR/NCL/EIF3D/SLC7A11/TP53/FXR1/TRMT10C/TRAP1/CNOT7/TIA1/SHMT2/MKNK2/EIF4A2/POLR2G/YBX3/RTN3/C1QBP/ZFP36/TPR/TMED10/PPP1CA/KRT17/ILF3/ANG/P…	107
BP	GO:0006521	regulation of cellular amino acid metabolic process	26/2365	62/18862	6.89258e-09	3.85091e-07	2.97335e-07	PSMB9/PSMB1/PSMB8/PSMA4/PSMC4/PSMA7/PSME2/PSME1/PSMD14/PSMA5/PSMB2/PSMA3/OAZ2/PSMD8/SLC7A11/PSMD1/PSMD7/PSMD4/PSMA1/PSMD11/PSMC3/PSMD6/PSMD2/OAZ1/PSMD3/NQO1	26
BP	GO:0010498	proteasomal protein catabolic process	105/2365	483/18862	7.7016e-09	4.26344e-07	3.29187e-07	PSMB9/IFI27/NUPR1/HSP90AB1/RPL11/RPS27A/PSMB1/PSMB8/PSMA4/RACK1/NOP53/PLAA/PSMC4/PSMA7/CAV1/PSME2/UBXN4/PSME1/PSMD14/PSMA5/SDCBP/SMARCC1/PSMB2/FBXO2/DESI1/CUL2/HSPA1A/PML/PSMA3/BUB3/SPSB2/PSMD8/SKP1/FBXW5/CSNK1A1/VCP/FBXO5/SEC61B/PSMD1/PSMD7/DDIT3/PSMD4/TOPORS/UFL1/PSMA1/PSMD11/GID8/PTTG1/GBA/WAC/NUB1/NPLOC4/RCN3/PSMC3/SUMO1/ANAPC11/UBE2S/MAN1B1/PRPF19/TMEM129/NFE2L2/CRBN/AKT1/CLU/PSMD6/PPP2CB/WW…	105
BP	GO:0034470	ncRNA processing	91/2365	400/18862	7.82301e-09	4.29128e-07	3.31336e-07	RPL5/RPS6/RPS19/RPS8/RPL11/FBL/RPL35A/RPS14/RPS9/RPS2/SSB/NOP58/EXOSC5/CDKAL1/RPF2/NOP53/RPL10A/NOL8/IMP4/NIFK/RPP40/RPL26/RPS7/WDR12/GTPBP4/RCL1/RPS21/EXOSC3/DDX18/WDR3/PA2G4/XRN2/TP53RK/MPHOSPH10/DKC1/ERI3/WBP11/MRPL44/TRMT61B/RPL35/TRMT6/INTS11/RPS16/WDR75/RTCB/TRMT10C/RPL14/SRFBP1/UTP11/UTP4/NOP56/WDR43/INTS10/TPRKB/NOB1/RPF1/NVL/DCAF13/EXOSC9/RPL7L1/DDX27/EXOSC8/NOL10/BMS1/KRR1/BYSL/RPS25/MR…	91
BP	GO:1901987	regulation of cell cycle phase transition	104/2365	478/18862	8.66371e-09	4.70963e-07	3.63638e-07	PSMB9/CDKN2A/TUBA1A/TUBB/NPM1/PSMB1/MUC1/HSP90AA1/SOX4/PSMB8/PSMA4/MAD2L2/TFDP2/CDK4/SFN/DCTN3/BCL2/IK/NOP53/ID2/PSMC4/PBX1/PSMA7/PCNA/CDKN2B/BTG2/PSME2/RPL26/PSME1/PSMD14/VPS4B/PSMA5/DUSP1/NAE1/RDX/RAB11A/PSMB2/PPP2R1A/HAUS6/PML/PSMA3/BUB3/ZNF655/PRMT1/PSMD8/SKP1/HAUS1/PHB2/TP53/FBXO5/PLCB1/CNOT7/APEX1/YWHAE/SYF2/PSMD1/PSMD7/CDC25B/PSMD4/HYAL1/TTK/PSMA1/PSMD11/EZH2/TPR/PLRG1/PSMC3/ANAPC11/BABAM2…	104
BP	GO:0007006	mitochondrial membrane organization	44/2365	144/18862	8.86558e-09	4.77633e-07	3.68788e-07	HSP90AA1/ATP5F1C/TFDP2/SFN/BCL2/YWHAB/PDCD5/DYNLT1/ATP5F1B/ATP5ME/IMMT/EYA2/ATP5PB/CHCHD10/HSPA4/ATP5MC3/TMEM11/ATP5IF1/HSPA9/BNIP3/YWHAQ/HSPA1A/BAK1/ATP5F1A/TP53/CNP/SLC25A5/YWHAZ/CALM3/YWHAE/TIMM10/BCS1L/MAPK8/HEBP2/TIMM50/BAX/ROMO1/NOL3/RTL10/TIMM8B/ATP5MG/HIP1R/YWHAG/SPG7	44
BP	GO:0034620	cellular response to unfolded protein	45/2365	149/18862	9.01725e-09	4.81505e-07	3.71778e-07	AGR2/HSPD1/ERO1A/CLGN/OPTN/RACK1/ABCA7/MYDGF/EXTL2/KLHDC3/CREB3L2/HSPA9/HSPA1A/BAK1/YIF1A/PIK3R1/VCP/HSPA8/DDIT3/UFL1/ATF3/VAPB/TPP1/PPP1R15A/NFE2L2/CREB3L4/TMED2/BAX/AMFR/HSPA6/SEC31A/KDELR3/SRPRA/SELENOS/NCK1/HYOU1/SHC1/TMBIM6/RHBDD2/DNAJC3/LMNA/CCND1/XBP1/CANX/HSPA5	45
BP	GO:0006417	regulation of translation	95/2365	425/18862	9.40106e-09	4.97597e-07	3.84202e-07	YBX1/RPL5/RPL13A/GAPDH/NPM1/PUM3/EIF5A/SOX4/RPS14/HSPB1/SHMT1/RPS9/EIF2AK2/CDK4/SRP9/EIF3E/RPL10/PAIP1/RACK1/EIF4EBP1/BTG2/RPL26/LSM14A/MAGOH/EIF3K/KHDRBS1/RPL22/EIF2A/PA2G4/YTHDF2/CSDE1/CAPRIN1/SYNCRIP/CDC123/LARP6/PLXNB2/ITGA2/CNBP/ETF1/RMND1/DAPK1/HNRNPR/NCL/EIF3D/FXR1/TRMT10C/TRAP1/CNOT7/TIA1/SHMT2/MKNK2/EIF4A2/POLR2G/YBX3/C1QBP/ZFP36/TPR/PPP1CA/KRT17/ILF3/ANG/PPP1R15A/PTCD3/RPL38/ERBB2/TMED2…	95
BP	GO:0043687	post-translational protein modification	84/2365	361/18862	9.84015e-09	5.16309e-07	3.9865e-07	SPP1/PSMB9/FGG/TIMP1/PSMB1/FGA/IGFBP3/PSMB8/PSMA4/MSLN/MXRA8/SERPINA1/CST3/APLP2/PSMC4/PSMA7/IGFBP4/PSME2/PSME1/PSMD14/P4HB/QSOX1/PSMA5/NAE1/RAB11A/EPAS1/C3/PSMB2/GOLM1/CALU/FBXO2/LMO7/FSTL3/CUL2/PSMA3/SPSB2/PSMD8/SKP1/FBXW5/TULP4/PRSS23/LGALS1/ESCO1/WSB1/UCHL3/SUMF1/PSMD1/PSMD7/PSMD4/PSMA1/PSMD11/DCAF13/COPS3/NUB1/RAB2A/ATG5/PSMC3/VWA1/LAMC1/RABGGTB/CRTAP/KLHL2/PSMD6/PSMD2/HIF1A/SUMF2/NEDD8/PSMD…	84
BP	GO:0140053	mitochondrial gene expression	48/2365	165/18862	1.12371e-08	5.84522e-07	4.51319e-07	MRPL42/SLC25A33/MRPS30/CHCHD10/RARS2/MRPL47/MRPS35/RMND1/MRPL44/TRMT61B/MRPS22/MRPL19/TRMT10C/SHMT2/MRPL3/MRPL37/MRPS9/DAP3/MRPS26/MRPL41/C1QBP/MRPS10/MRPL22/PTCD3/MRPL20/MRPL57/FOXO3/MRPL40/MRPL30/PRKAA1/MRPL9/MRPL36/MRPL16/AURKAIP1/MRPS18A/PNPT1/MRPL51/MRPL33/MRPS28/HSD17B10/MTIF3/MRPS33/GADD45GIP1/COA3/MRPL52/MRPL54/MRPS7/MRPL12	48
BP	GO:1901532	regulation of hematopoietic progenitor cell differentiation	32/2365	89/18862	1.24161e-08	6.4033e-07	4.94409e-07	PSMB9/PSMB1/PSMB8/PSMA4/EIF2AK2/MYB/PDCD2/PSMC4/PSMA7/PSME2/PSME1/PSMD14/PSMA5/YTHDF2/PSMB2/HSPA9/PSMA3/PSMD8/PSMD1/PSMD7/PSMD4/PSMA1/PSMD11/YAP1/PSMC3/NFE2L2/PSMD6/PSMD2/DHX36/HES1/PSMD3/RUNX1	32
BP	GO:0006913	nucleocytoplasmic transport	80/2365	340/18862	1.30339e-08	6.66496e-07	5.14612e-07	IFI27/HSP90AB1/NPM1/EIF5A/SNRPE/SSB/HNRNPA1/SFN/SRRM1/SNRPD1/RAN/SNRPD2/SRSF3/ANP32A/RAE1/ANGPT1/PPP1CC/ALKBH5/CDC40/MAGOH/APOD/CSE1L/KHDRBS1/RBM22/MAGOHB/SRSF7/HSPA9/DESI1/SNRPF/PML/SNRPD3/PTTG1IP/PKIG/PIK3R1/SLU7/PHB2/TP53/SP100/BARD1/CDH1/KPNA3/YWHAE/PPP1R12A/CHP1/PHAX/TPR/SRSF2/IPO9/CPSF6/NUP62/HDAC3/DDX39A/AKT1/SNRPG/NCBP2/RBM8A/UPF2/SMURF1/SRSF4/HNRNPA2B1/RPAIN/FLNA/SRSF11/NMD3/NOLC1/HTATIP…	80
BP	GO:0034341	response to interferon-gamma	54/2365	197/18862	1.39542e-08	7.07561e-07	5.46319e-07	GBP1/KYNU/STAT1/HLA-B/HLA-DRA/RPL13A/GAPDH/HSP90AB1/CD74/HLA-DRB1/HLA-DPA1/GBP2/LGALS9/GBP5/HLA-DPB1/GBP4/B2M/TRIM22/PARP9/IFITM3/IRF1/HLA-C/PARP14/CDC42/GBP3/HLA-E/KIF5B/SYNCRIP/HCK/HLA-DQB1/PML/NMI/DAPK1/OAS2/ACTR3/TP53/SP100/IFNGR2/EDN1/OAS1/TRIM38/NUB1/BST2/SUMO1/IFITM2/CLDN1/CCL20/GSN/HLA-F/SLC11A1/MYO1C/CXCL16/HLA-A/ICAM1	54
BP	GO:0042255	ribosome assembly	26/2365	64/18862	1.53475e-08	7.71722e-07	5.95858e-07	RPL5/RPS19/NPM1/RPL11/RPS14/XRCC5/RPSA/RPL24/RPS10/RPL10/BRIX1/RPF2/NOP53/EIF2A/RPS5/RPL3/C1QBP/MRPL22/MRPL20/RPL38/MRTO4/RPS28/SBDS/RPS27/RRP7A/MRPS7	26
BP	GO:0009615	response to virus	83/2365	359/18862	1.64066e-08	8.18161e-07	6.31715e-07	STMN1/IFI6/IFI44/GBP1/IFI16/STAT1/IFI27/IFI44L/ISG15/MX1/CXCR4/LGALS9/HSP90AA1/HSPB1/DDX58/TRIM22/PARP9/IFITM3/IRF1/PLSCR1/IVNS1ABP/EIF2AK2/IFIT3/CXCL10/IFIH1/EXOSC5/BCL2/RTP4/NOP53/NPC2/SAMHD1/HMGA1/BIRC3/GBP3/LSM14A/ENO1/IFIT1/CCT5/CGAS/BNIP3/NT5C3A/PML/NMI/ATAD3A/HNRNPUL1/OAS2/IFIT2/PHB2/G3BP1/CNOT7/IFNGR2/UNC93B1/HYAL1/ITGB6/APOBEC3G/OAS1/C1QBP/NPLOC4/BST2/DDX60/IFITM2/ILF3/DDIT4/LGALS8/BAX/C…	83
BP	GO:0034504	protein localization to nucleus	68/2365	275/18862	2.00801e-08	9.9314e-07	7.66819e-07	HSP90AB1/RPL11/GBP2/TCP1/PARP1/PARP9/CCT2/CCT4/CCT3/GLUL/RAN/RPF2/NOP53/NOL8/ANGPT1/ABCA7/APOD/CSE1L/CCT7/CHCHD10/RBM22/CCT5/SIX1/SOX9/PML/PTTG1IP/DKC1/INTS13/SKP1/PKIG/PIK3R1/PHB2/TP53/SP100/BARD1/CDH1/KPNA3/YWHAE/TMEM98/TOPORS/CHP1/ARL2BP/NVL/TPR/YAP1/IPO9/PLRG1/CCT8/HNRNPU/NUP62/HDAC3/BYSL/TRIM29/AKT1/RPAIN/FLNA/NMD3/NOLC1/CDK1/DVL1/TXNIP/COL1A1/HYAL2/PSEN1/NFKBIA/LMNA/SEC13/CD2AP	68
BP	GO:0006900	vesicle budding from membrane	36/2365	109/18862	2.08145e-08	1.0211e-06	7.88405e-07	S100A10/MX1/AREG/SERPINA1/SNX3/INSIG1/FNBP1L/ANXA2/GOLPH3L/AP2M1/VAPB/PEF1/TMED10/SEC24D/SEC16A/PICALM/TMED2/SEC31A/SEC23A/TMED9/AP3D1/ARF1/TGFA/WASL/CD59/GOLGA2/TRAPPC4/BET1/LMAN1/PDCD6/CHMP4C/CSNK1D/USO1/RAB1B/GOLPH3/SEC13	36
BP	GO:1903900	regulation of viral life cycle	44/2365	148/18862	2.2183e-08	1.07945e-06	8.33463e-07	IFI16/ISG15/MX1/CD74/HLA-DRB1/LGALS9/LTF/TRIM22/IFITM3/LY6E/PLSCR1/EIF2AK2/HACD3/BCL2/SNX3/CAV2/IFIT1/P4HB/VPS4B/STAU1/PROX1/SLPI/PPIH/PML/OAS2/LGALS1/CNOT7/SRPK1/TMPRSS4/TNIP1/APOBEC3G/OAS1/TRIM38/VAPB/BST2/IFITM2/ILF3/GSN/FAM111A/NECTIN2/ISG20/PPIA/CHMP4C/TOP2A	44
BP	GO:0032543	mitochondrial translation	41/2365	134/18862	2.69615e-08	1.30149e-06	1.0049e-06	MRPL42/MRPS30/RARS2/MRPL47/MRPS35/RMND1/MRPL44/MRPS22/MRPL19/TRMT10C/SHMT2/MRPL3/MRPL37/MRPS9/DAP3/MRPS26/MRPL41/C1QBP/MRPS10/MRPL22/PTCD3/MRPL20/MRPL57/MRPL40/MRPL30/MRPL9/MRPL36/MRPL16/AURKAIP1/MRPS18A/MRPL51/MRPL33/MRPS28/MTIF3/MRPS33/GADD45GIP1/COA3/MRPL52/MRPL54/MRPS7/MRPL12	41
BP	GO:0051098	regulation of binding	82/2365	357/18862	2.72309e-08	1.30406e-06	1.00688e-06	STMN1/S100A10/IFI16/HSP90AB1/HDAC2/RPL11/PARP1/MAD2L2/B2M/PARP9/EIF3E/SRI/RAN/RACK1/NKX3-1/TMSB4X/ANGPT1/CAV1/CDC42/HMGB1/GTPBP4/NUCKS1/IFIT1/MET/TGFBR1/JUN/ID1/LARP6/SLPI/HEY1/CEBPG/ITGA2/CSNK2B/CTHRC1/ZNF462/EIF3D/IFIT2/RUVBL2/ADAM15/CSNK1A1/KDM1A/DTNBP1/SP100/CALM3/ANXA2/GTF2B/LRPAP1/DDIT3/MAPK8/TMC8/NVL/EDF1/PPP1CA/NME1/SUMO1/RAMP1/MAP2/PPP2CA/AKT1/BAX/PPP2CB/AMFR/AURKA/ATP2A2/NMD3/HES1/DVL1/…	82
BP	GO:0043484	regulation of RNA splicing	43/2365	145/18862	3.4627e-08	1.64519e-06	1.27028e-06	RPS26/HNRNPF/HNRNPA1/SRSF3/RPS13/SRSF10/RBM38/ZNF326/RBMX/MAGOH/KHDRBS1/RBM22/SRSF7/WTAP/HSPA1A/AHNAK2/PIK3R1/NCL/FXR1/TIA1/SRPK1/HSPA8/THRAP3/HNRNPK/RBMXL1/C1QBP/RBM42/HNRNPU/PRPF19/PUF60/FASTK/RBM8A/AHNAK/SNRNP70/SRSF4/DDX5/HNRNPA2B1/TRA2B/CELF1/TMBIM6/HNRNPH2/SAP18/SON	43
BP	GO:0010948	negative regulation of cell cycle process	82/2365	359/18862	3.53972e-08	1.66865e-06	1.28839e-06	PSMB9/CDKN2A/HSP90AB1/NPM1/PSMB1/MUC1/SOX4/PSMB8/PSMA4/MAD2L2/TFDP2/CDK4/SFN/BCL2/IK/NOP53/PSMC4/PSMA7/PCNA/CDKN2B/BTG2/PSME2/RPL26/PSME1/PSMD14/PSMA5/DUSP1/NAE1/PSMB2/RAD1/EPC1/NAA10/PML/PSMA3/BUB3/ZNF655/PRMT1/PSMD8/EHMT2/SKP1/TP53/FBXO5/CNOT7/SYF2/PSMD1/PSMD7/PSMD4/TTK/PSMA1/PSMD11/PTTG1/EZH2/TPR/RBBP4/PSMC3/BABAM2/BAX/PSMD6/PSMD2/AURKA/AURKAIP1/CENPF/BMI1/CDK2AP2/CNOT2/RAD21/CDC73/PSMD3/CDK1/…	82
BP	GO:2001234	negative regulation of apoptotic signaling pathway	58/2365	224/18862	3.86954e-08	1.80998e-06	1.39752e-06	IFI6/DNAJA1/CD74/FGB/FGG/MUC1/FGA/HSPB1/TNFSF10/IVNS1ABP/BCL2/ENO1/EYA2/TGFBR1/LGALS3/ARHGEF2/NOC2L/HDAC1/HSPA1A/PRDX2/PHIP/PTTG1IP/GSTP1/FXN/KDM1A/SLC25A5/GNAI3/TRAP1/NDUFS3/CAAP1/EYA3/ITGAV/YBX3/TMBIM1/YAP1/NFE2L2/CSNK2A1/AKT1/BAX/CLU/HIF1A/SELENOS/GCLM/NOL3/HYOU1/HMGB2/TMBIM6/TRADD/CTTN/MAGEA3/MIF/ICAM1/PSEN1/PPIA/TPT1/XBP1/TXNDC12/PLAUR	58
BP	GO:0035722	interleukin-12-mediated signaling pathway	21/2365	47/18862	5.07397e-08	2.3551e-06	1.81841e-06	TCP1/HNRNPF/LMNB1/MTAP/CDC42/PSME2/TALDO1/P4HB/HSPA9/HNRNPDL/PLCB1/ANXA2/PDCD4/SOD1/HNRNPA2B1/CAPZA1/ARF1/MIF/PPIA/MSN/CNN2	21
BP	GO:1903320	regulation of protein modification by small protein conjugation or removal	60/2365	237/18862	5.46795e-08	2.5186e-06	1.94465e-06	RPL5/DNAJA1/ISG15/HSP90AB1/RPL11/HSP90AA1/SOX4/MAD2L2/IVNS1ABP/RPS2/SAE1/NOP53/PLAA/ANGPT1/CAV1/SVBP/BIRC3/RPS7/GTPBP4/UBA2/EPAS1/TGFBR1/UBE2N/FBXO2/HSPA1A/VPS28/SQSTM1/NMI/PTTG1IP/SKP1/VCP/KDM1A/FBXO5/UBE2L3/TOPORS/CHP1/TNIP1/UFL1/PEF1/ATG5/UBE2S/HDAC3/AKT1/HIF1A/INAVA/BMI1/UBXN1/EGR1/RNF20/XIAP/CDC20/GOLGA2/PSEN1/PPIA/CENPX/PDCD6/TSPO/SIRT7/CTNNB1/HSPA5	60
BP	GO:0060071	Wnt signaling pathway, planar cell polarity pathway	35/2365	108/18862	5.59154e-08	2.55601e-06	1.97354e-06	PSMB9/PSMB1/PSMB8/PSMA4/PSMC4/PSMA7/CDC42/PSME2/PLEKHA4/PSME1/PSMD14/PSMA5/PSMB2/AP2S1/PSMA3/PSMD8/CTHRC1/PSMD1/PSMD7/RSPO3/PSMD4/PSMA1/PSMD11/AP2M1/CELSR1/PSMC3/CLTC/PSMD6/SMURF1/PSMD2/FZD5/PSMD3/DVL1/RAC1/AP2A1	35
BP	GO:0043624	cellular protein complex disassembly	57/2365	221/18862	5.85008e-08	2.65409e-06	2.04926e-06	STMN1/EIF5A/MRPL42/VPS4B/MRPS30/MRPL47/RDX/ARHGEF2/SVIL/CIB1/ETF1/MRPS35/MRPL44/MRPS22/MRPL19/MRPL3/HSPA8/MRPL37/MRPS9/DAP3/MRPS26/MRPL41/MRPS10/CAPZB/MRPL22/PTCD3/MRPL20/MRPL57/KIF2A/SPTBN1/MRPL40/MRPL30/MRPL9/GSN/MRPL36/MRPL16/GAK/AURKAIP1/ADD3/MRPS18A/KIF2C/CAPZA1/FLII/LIMA1/MRPL51/MRPL33/MRPS28/SPTAN1/TPX2/TRMT112/MRPS33/DSTN/GADD45GIP1/MRPL52/MRPL54/MRPS7/MRPL12	57
BP	GO:0060249	anatomical structure homeostasis	99/2365	466/18862	6.83197e-08	3.07642e-06	2.37536e-06	SPP1/AZGP1/HSP90AB1/TFF1/HSP90AA1/HSPB1/TCP1/PARP1/B2M/XRCC5/LTF/FGGY/CCT2/CCT4/HNRNPA1/CCT3/BCL2/PCNA/ANGPT1/FH/CIB2/PROM1/MUC4/SLC2A1/CCT7/CCT5/EPAS1/SOX9/STRAP/ERCC1/IQCB1/PTGES3/PML/GPR137B/PKIB/PRIM1/VEGFA/DKC1/DCLRE1C/SP100/BARD1/TFF3/APEX1/HNRNPC/TFF2/POLE4/TPRKB/ITGB6/POLD4/POLE3/LPCAT1/TPP1/YAP1/CCT8/HNRNPU/NAPSA/RCN3/RFC4/CA2/ALDOA/ACP5/LAMC1/SOD1/ADAM8/CLDN1/TCIRG1/RFC1/TJP1/BAX/PRKAA1…	99
BP	GO:0052547	regulation of peptidase activity	97/2365	455/18862	7.76925e-08	3.47257e-06	2.68122e-06	IFI6/IFI16/PSMB9/CSTB/GAPDH/F3/TIMP1/ASPH/LGALS9/RARRES1/HSPD1/PSMB8/TNFSF10/HSPE1/CASP8AP2/LTF/TFPI/SERPING1/SFN/SERPINA1/SOX2/CST3/FAM162A/PDCD2/RACK1/APLP2/NKX3-1/CAV1/PDCD5/SVBP/SPINK1/PSME2/BIRC3/FURIN/HMGB1/PSME1/PSMD14/C3/SPINT1/SLPI/HDAC1/FIS1/PML/BAK1/SERPINB4/CTSD/PSMA3/VEGFA/SPINT2/CST6/DAPK1/S100A8/PROS1/VCP/PEBP1/TIMP2/YWHAE/ANXA2/CAAP1/PTTG1/TMED10/BST2/RCN3/NRDC/MTCH1/PICALM/CSNK2A…	97
BP	GO:0071347	cellular response to interleukin-1	49/2365	180/18862	8.13016e-08	3.60716e-06	2.78515e-06	GBP1/PSMB9/FGB/GBP2/RPS27A/PSMB1/PSMB8/PSMA4/TFPI/PSMC4/NKX3-1/PSMA7/PSME2/GBP3/RBMX/PSME1/PSMD14/PSMA5/SOX9/PSMB2/UBE2N/SQSTM1/PSMA3/PSMD8/SKP1/PLCB1/MAP3K8/PSMD1/PSMD7/EDN1/PSMD4/HYAL1/PSMA1/PSMD11/PSMC3/AKAP12/PSMD6/CCL20/PSMD2/HIF1A/CEBPB/VRK2/PSMD3/TNIP2/EGR1/MAPK3/HYAL2/ICAM1/NFKBIA	49
BP	GO:0006403	RNA localization	59/2365	234/18862	8.20927e-08	3.61567e-06	2.79172e-06	YBX1/NPM1/EIF5A/FBL/TCP1/CCT2/CCT4/SSB/HNRNPA1/NOP58/CCT3/SRRM1/RAN/SRSF3/RAE1/ALKBH5/CDC40/MAGOH/EXOSC3/KHDRBS1/CCT7/MAGOHB/CCT5/SRSF7/SFPQ/TOMM20/DKC1/SLU7/RUVBL2/RUVBL1/PHAX/ZFP36/TPR/SRSF2/CPSF6/CCT8/HNRNPU/NUP62/PRPF18/DDX39A/NCBP2/RBM8A/UPF2/TGFBR2/SRSF4/HNRNPA2B1/PRPF6/DHX36/PNPT1/SRSF11/NMD3/MYO1C/FYTTD1/AGFG1/MVP/NOP10/THOC6/SEC13/SLBP	59
BP	GO:0000302	response to reactive oxygen species	57/2365	224/18862	9.65338e-08	4.2209e-06	3.25903e-06	HDAC2/S100A7/AKR1C3/RHOB/MYB/BCL2/RACK1/PCNA/ADAM9/ADA/APOD/SDC1/DUSP1/MET/JUN/BNIP3/PRDX2/BAK1/UCP2/GSTP1/FXN/SCGB1A1/ZNF580/TRAP1/APEX1/PDCD10/EDN1/MAPK8/HYAL1/EZH2/TXNRD2/STK24/SOD1/NFE2L2/AKT1/PPP2CB/PRKAA1/PLEKHA1/HIF1A/OSER1/PYCR1/TPM1/ROMO1/HBB/NET1/PRDX5/TRA2B/PRDX1/ANXA1/EEF2/MAPK3/TXNIP/COL1A1/HYAL2/PXN/CAPN2/NQO1	57
BP	GO:1904874	positive regulation of telomerase RNA localization to Cajal body	11/2365	15/18862	9.90993e-08	4.30191e-06	3.32157e-06	TCP1/CCT2/CCT4/CCT3/CCT7/CCT5/DKC1/RUVBL2/RUVBL1/CCT8/NOP10	11
BP	GO:0034340	response to type I interferon	33/2365	101/18862	1.06673e-07	4.59759e-06	3.54987e-06	IFI6/STAT1/HLA-B/IFI27/ISG15/HSP90AB1/MX1/GBP2/PSMB8/IFITM3/IRF1/XAF1/IFIT3/HLA-C/SAMHD1/LSM14A/HLA-E/IFIT1/YTHDF2/OAS2/IFIT2/SP100/CNOT7/SHMT2/OAS1/BST2/IFITM2/HLA-F/EGR1/ISG20/HLA-A/PTPN11/TRIM56	33
BP	GO:0071349	cellular response to interleukin-12	21/2365	49/18862	1.22829e-07	5.2564e-06	4.05855e-06	TCP1/HNRNPF/LMNB1/MTAP/CDC42/PSME2/TALDO1/P4HB/HSPA9/HNRNPDL/PLCB1/ANXA2/PDCD4/SOD1/HNRNPA2B1/CAPZA1/ARF1/MIF/PPIA/MSN/CNN2	21
BP	GO:0002183	cytoplasmic translational initiation	17/2365	34/18862	1.24464e-07	5.28883e-06	4.08359e-06	RPL13A/EIF3E/EIF3M/EIF3K/YTHDF2/EIF4A1/EIF3D/EIF4A2/EIF2B3/EIF3I/EIF3L/EIF5/NCK1/EIF3F/EIF2S2/DENR/EIF3B	17
BP	GO:0033157	regulation of intracellular protein transport	61/2365	248/18862	1.29484e-07	5.46368e-06	4.21859e-06	IFI27/HSP90AB1/TFDP2/SFN/RAN/BCL2/SAE1/YWHAB/ANGPT1/PDCD5/CDC42/STOM/INSIG1/APOD/KIF5B/CD81/RBM22/ITGB2/ATP5IF1/YWHAQ/FIS1/CIB1/OAZ2/PKIG/PIK3R1/TP53/SP100/UBE2L3/BARD1/YWHAZ/CDH1/YWHAE/PDCD10/MAPK8/CHP1/TPR/NUP62/HDAC3/SEC16A/ERBB2/PRKAA1/OAZ1/FZD5/FLNA/ERLEC1/UBE2J1/NOLC1/NPEPPS/UBE2J2/MYO1C/TOMM7/UBL5/NUCB1/HYAL2/PSEN1/LMAN1/LEPROT/YWHAG/SIRT7/PTPN11/BCAP31	61
BP	GO:0010038	response to metal ion	79/2365	352/18862	1.37254e-07	5.75133e-06	4.44069e-06	S100A16/FGB/FGG/FGA/TFF1/AQP3/AKR1C3/PARP1/B2M/PLSCR1/CDK4/CACYBP/CRIP1/MT1E/BCL2/IGFBP2/PCNA/CAV1/ADAM9/SDC1/DUSP1/JUN/ERCC1/SYT8/S100A13/BNIP3/LOXL2/FSTL3/MT1M/SORD/FXN/S100A8/CALM2/CACNA1H/CDH1/CALM3/CLIC4/EDN1/MAPK8/PEF1/PPP1CA/SUMO1/GGH/CA2/SOD1/PPP2CA/CLDN1/TCIRG1/NFE2L2/AKT1/PAM/PPP2CB/PRKAA1/GSN/ANXA11/HIF1A/SEC31A/LGMN/P2RX4/JUND/CCNB1/MAPK3/TXNIP/PTGES/CYB5A/FOSB/NEDD4L/NDRG1/ICAM1/NCST…	79
BP	GO:0090175	regulation of establishment of planar polarity	35/2365	112/18862	1.54242e-07	6.41858e-06	4.95589e-06	PSMB9/PSMB1/PSMB8/PSMA4/PSMC4/PSMA7/CDC42/PSME2/PLEKHA4/PSME1/PSMD14/PSMA5/PSMB2/AP2S1/PSMA3/PSMD8/CTHRC1/PSMD1/PSMD7/RSPO3/PSMD4/PSMA1/PSMD11/AP2M1/CELSR1/PSMC3/CLTC/PSMD6/SMURF1/PSMD2/FZD5/PSMD3/DVL1/RAC1/AP2A1	35
BP	GO:0030968	endoplasmic reticulum unfolded protein response	38/2365	127/18862	1.64337e-07	6.79184e-06	5.24409e-06	AGR2/ERO1A/CLGN/RACK1/ABCA7/MYDGF/EXTL2/KLHDC3/CREB3L2/BAK1/YIF1A/PIK3R1/VCP/DDIT3/UFL1/ATF3/VAPB/TPP1/PPP1R15A/NFE2L2/CREB3L4/TMED2/BAX/AMFR/SEC31A/KDELR3/SRPRA/SELENOS/NCK1/HYOU1/SHC1/RHBDD2/DNAJC3/LMNA/CCND1/XBP1/CANX/HSPA5	38
BP	GO:0035967	cellular response to topologically incorrect protein	46/2365	168/18862	1.66383e-07	6.82964e-06	5.27328e-06	AGR2/HSPD1/ERO1A/CLGN/OPTN/RACK1/ABCA7/MYDGF/EXTL2/KLHDC3/CREB3L2/HSPA9/HSPA1A/BAK1/YIF1A/PIK3R1/VCP/HSPA8/DDIT3/UFL1/ATF3/VAPB/TPP1/PPP1R15A/NFE2L2/CREB3L4/TMED2/BAX/AMFR/HSPA6/SEC31A/KDELR3/SRPRA/SELENOS/NCK1/HYOU1/SHC1/TMBIM6/RHBDD2/DNAJC3/UFD1/LMNA/CCND1/XBP1/CANX/HSPA5	46
BP	GO:0002831	regulation of response to biotic stimulus	90/2365	420/18862	1.78623e-07	7.28249e-06	5.62293e-06	IFI16/STAT1/HLA-B/PSMB9/RPS19/HSP90AB1/HLA-DRB1/PSMB1/LGALS9/GBP5/MUC1/HSPD1/HSP90AA1/PSMB8/PSMA4/XRCC5/DDX58/LTF/PARP9/IRF1/PLSCR1/OPTN/SERPING1/PARP14/MUCL1/NOP53/PSMC4/PSMA7/SAMHD1/KLK5/PSME2/BIRC3/CD55/HMGB1/LSM14A/HLA-E/MUC4/PSME1/IFIT1/PSMD14/MUC16/PSMA5/YTHDF2/HCK/PSMB2/CGAS/PRDX2/SFPQ/SERPINB4/PSMA3/NMI/PSMD8/CEACAM1/SKP1/CNOT7/PSMD1/LAMP1/IFNGR2/PSMD7/PSMD4/APOBEC3G/PSMA1/PSMD11/C1QBP/NP…	90
BP	GO:0070498	interleukin-1-mediated signaling pathway	33/2365	103/18862	1.79956e-07	7.28761e-06	5.62688e-06	PSMB9/RPS27A/PSMB1/PSMB8/PSMA4/PSMC4/PSMA7/PSME2/PSME1/PSMD14/PSMA5/PSMB2/UBE2N/SQSTM1/PSMA3/PSMD8/SKP1/PLCB1/MAP3K8/PSMD1/PSMD7/PSMD4/PSMA1/PSMD11/PSMC3/PSMD6/PSMD2/VRK2/PSMD3/TNIP2/EGR1/MAPK3/NFKBIA	33
BP	GO:0006888	endoplasmic reticulum to Golgi vesicle-mediated transport	53/2365	206/18862	1.83498e-07	7.3815e-06	5.69938e-06	AREG/SERPINA1/DCTN3/CD55/INSIG1/CREB3L2/TMED3/YIF1A/TMED4/PROS1/VCP/VAPB/PEF1/TMED10/SEC24D/CAPZB/SEC16A/KDELR2/TMED2/SPTBN1/DYNC1LI2/ERGIC2/SEC31A/KDELR3/TMED1/ARF4/SEC23A/COPB2/MIA2/TMED9/CAPZA1/ARF1/HYOU1/YKT6/BET1L/TGFA/SPTAN1/CD59/IER3IP1/GOLGA2/TRAPPC4/BET1/LMAN1/PDCD6/COPZ1/VTI1B/CSNK1D/USO1/RAB1B/BCAP31/BCAP29/SEC13/NRBP1	53
BP	GO:0030490	maturation of SSU-rRNA	21/2365	50/18862	1.8682e-07	7.41625e-06	5.7262e-06	RPS19/RPS8/RPS14/RPP40/RCL1/RPS21/WDR3/RPS16/SRFBP1/UTP4/NOB1/DCAF13/NOL10/BMS1/BYSL/RPS28/GTF2H5/DDX52/SNU13/FAM207A/RIOK3	21
BP	GO:0070671	response to interleukin-12	21/2365	50/18862	1.8682e-07	7.41625e-06	5.7262e-06	TCP1/HNRNPF/LMNB1/MTAP/CDC42/PSME2/TALDO1/P4HB/HSPA9/HNRNPDL/PLCB1/ANXA2/PDCD4/SOD1/HNRNPA2B1/CAPZA1/ARF1/MIF/PPIA/MSN/CNN2	21
BP	GO:0045862	positive regulation of proteolysis	81/2365	367/18862	2.02016e-07	7.96709e-06	6.15152e-06	IFI16/NUPR1/HDAC2/F3/ASPH/LGALS9/HSPD1/TNFSF10/HSPE1/CASP8AP2/PLGRKT/FAM162A/PDCD2/RACK1/NOP53/PSMC4/NKX3-1/CAV1/PDCD5/PSME2/FURIN/HMGB1/ENO1/ADAM9/PSME1/PSMD14/ATP5IF1/FIS1/HSPA1A/PML/BAK1/CTSD/DAPK1/S100A8/CSNK1A1/VCP/TIMM17A/TNIP1/GBA/NUB1/HPN/RCN3/PSMC3/SUMO1/SNX9/ADAM8/NRDC/MTCH1/NFE2L2/PICALM/AKT1/BAX/CLU/GSN/MYC/SMURF1/AURKA/AURKAIP1/PRSS22/TMEM259/CLDN4/LGMN/ARL6IP5/ADRM1/DVL1/APH1A/CSNK1…	81
BP	GO:0019886	antigen processing and presentation of exogenous peptide antigen via MHC class II	32/2365	99/18862	2.18919e-07	8.57763e-06	6.62293e-06	HLA-DRA/CD74/HLA-DRB1/HLA-DPA1/HLA-DPB1/HLA-DMA/CTSL/CLTA/DCTN3/HLA-DMB/KIFAP3/HLA-DQB1/AP2S1/CTSD/AP2M1/SEC24D/CAPZB/CTSV/KIF2A/CLTC/DYNC1LI2/SEC31A/SEC23A/LGMN/KIF2C/CAPZA1/ARF1/CTSS/AP1S1/SEC13/CANX/AP2A1	32
BP	GO:0050821	protein stabilization	50/2365	191/18862	2.27596e-07	8.8601e-06	6.84103e-06	RPL5/GAPDH/HSP90AB1/RPL11/HSPD1/HSP90AA1/SOX4/TESC/TCP1/CCT2/CCT4/CCT3/NOP53/RPS7/TSPAN1/GTPBP4/CCT7/CCT5/ATP1B3/HSPA1A/PTGES3/CDC37L1/PIK3R1/PHB2/TP53/PDCD10/LAMP1/CCNH/CHP1/PDCL3/CCT8/SUMO1/SEC16A/CRTAP/CLU/SUGT1/GLMP/FLNA/GOLGA7/CTNND1/TNIP2/FLOT2/DVL1/GNAQ/SEL1L/MDM4/GRN/HIP1R/ATP1B1/PPIB	50
BP	GO:0050684	regulation of mRNA processing	40/2365	139/18862	2.50391e-07	9.68501e-06	7.47795e-06	HNRNPA1/SRSF3/SRSF10/RBMX/MAGOH/KHDRBS1/SRSF7/WTAP/NCL/FXR1/BARD1/SNRPA/TIA1/SRPK1/HSPA8/THRAP3/HNRNPK/RBMXL1/C1QBP/RBM42/CPSF6/HNRNPU/PRPF19/PUF60/CDK11B/NCBP2/RBM8A/SNRNP70/SRSF4/DDX5/HNRNPA2B1/DHX36/TRA2B/CDC73/CELF1/CCNB1/RNF20/AHCYL1/SAP18/SON	40
BP	GO:1905897	regulation of response to endoplasmic reticulum stress	28/2365	81/18862	2.58219e-07	9.92415e-06	7.6626e-06	NUPR1/AGR2/RNF183/RACK1/CAV1/ABCA7/HSPA1A/ERP29/BAK1/PIK3R1/DDIT3/UFL1/PPP1R15A/NFE2L2/TMED2/BAX/CLU/TMEM259/SELENOS/UBXN1/NCK1/TMBIM6/MAGEA3/DNAJC3/BCAP31/XBP1/TXNDC12/HSPA5	28
BP	GO:0060337	type I interferon signaling pathway	31/2365	95/18862	2.65323e-07	1.00689e-05	7.77439e-06	IFI6/STAT1/HLA-B/IFI27/ISG15/HSP90AB1/MX1/GBP2/PSMB8/IFITM3/IRF1/XAF1/IFIT3/HLA-C/SAMHD1/LSM14A/HLA-E/IFIT1/YTHDF2/OAS2/IFIT2/SP100/CNOT7/OAS1/BST2/IFITM2/HLA-F/EGR1/ISG20/HLA-A/PTPN11	31
BP	GO:2001243	negative regulation of intrinsic apoptotic signaling pathway	31/2365	95/18862	2.65323e-07	1.00689e-05	7.77439e-06	DNAJA1/CD74/MUC1/HSPB1/IVNS1ABP/BCL2/ENO1/ARHGEF2/NOC2L/HDAC1/HSPA1A/PTTG1IP/KDM1A/TRAP1/NDUFS3/YBX3/NFE2L2/AKT1/CLU/HIF1A/SELENOS/NOL3/HYOU1/TMBIM6/MAGEA3/MIF/PPIA/TPT1/XBP1/TXNDC12/PLAUR	31
BP	GO:0033238	regulation of cellular amine metabolic process	27/2365	77/18862	3.02266e-07	1.13992e-05	8.80152e-06	PSMB9/PSMB1/PSMB8/PSMA4/PSMC4/PSMA7/PSME2/PSME1/PSMD14/PSMA5/PSMB2/ITGB2/PSMA3/OAZ2/PSMD8/SLC7A11/PSMD1/PSMD7/PSMD4/PSMA1/PSMD11/PSMC3/PSMD6/PSMD2/OAZ1/PSMD3/NQO1	27
BP	GO:0042180	cellular ketone metabolic process	61/2365	254/18862	3.17574e-07	1.19021e-05	9.18982e-06	KYNU/PSMB9/CD74/AKR1C2/PSMB1/IDO1/AKR1C3/PSMB8/PSMA4/OXCT1/NDUFA9/COQ3/PSMC4/PSMA7/CAV1/PSME2/CES1/AKR1B10/TPI1/INSIG1/PSME1/PSMD14/PSMA5/PROX1/SOX9/PSMB2/COQ8A/PSMA3/OAZ2/PSMD8/CEACAM1/AKR1C1/SLC7A11/CACNA1H/PSMD1/PSMD7/CYP4F3/PSMD4/GLO1/PSMA1/PSMD11/IRS1/APOC1/PSMC3/PDK1/AKT1/PSMD6/PSMD2/OAZ1/KDSR/PSMD3/ANXA1/ADM/EGR1/IRS2/COQ4/HSD17B10/NCOR2/LPGAT1/CBR3/NQO1	61
BP	GO:0060333	interferon-gamma-mediated signaling pathway	30/2365	91/18862	3.20214e-07	1.1927e-05	9.20901e-06	GBP1/STAT1/HLA-B/HLA-DRA/HSP90AB1/HLA-DRB1/HLA-DPA1/GBP2/HLA-DPB1/B2M/TRIM22/PARP9/IRF1/HLA-C/PARP14/HLA-E/HCK/HLA-DQB1/PML/NMI/OAS2/TP53/SP100/IFNGR2/OAS1/TRIM38/SUMO1/HLA-F/HLA-A/ICAM1	30
BP	GO:0051222	positive regulation of protein transport	71/2365	312/18862	3.34102e-07	1.23679e-05	9.54948e-06	HSP90AB1/HLA-DRB1/FGB/FGG/FGA/SOX4/TFDP2/OXCT1/SFN/SRI/RAN/BCL2/RACK1/SAE1/PHPT1/YWHAB/PDCD5/CDC42/STOM/ADAM9/KIF5B/CD81/RBM22/ITGB2/YWHAQ/FIS1/VPS28/VSNL1/CIB1/OAZ2/PIK3R1/TP53/UBE2L3/YWHAZ/CDH1/YWHAE/PDCD10/GOLPH3L/MAPK8/CHP1/TPR/TMED10/ANG/ADAM8/HDAC3/SEC16A/ERBB2/PRKAA1/HIF1A/OAZ1/FZD5/FLNA/NPEPPS/UBE2J2/MYO1C/ARF1/TOMM7/IRS2/UBL5/EZR/HYAL2/PSEN1/PPIA/LEPROT/RAC1/ARF6/YWHAG/BCAP31/NMU/GOLPH3/…	71
BP	GO:0071357	cellular response to type I interferon	31/2365	96/18862	3.45189e-07	1.2663e-05	9.77728e-06	IFI6/STAT1/HLA-B/IFI27/ISG15/HSP90AB1/MX1/GBP2/PSMB8/IFITM3/IRF1/XAF1/IFIT3/HLA-C/SAMHD1/LSM14A/HLA-E/IFIT1/YTHDF2/OAS2/IFIT2/SP100/CNOT7/OAS1/BST2/IFITM2/HLA-F/EGR1/ISG20/HLA-A/PTPN11	31
BP	GO:0052548	regulation of endopeptidase activity	90/2365	426/18862	3.46269e-07	1.2663e-05	9.77728e-06	IFI6/IFI16/PSMB9/CSTB/GAPDH/F3/TIMP1/ASPH/LGALS9/RARRES1/HSPD1/PSMB8/TNFSF10/HSPE1/CASP8AP2/LTF/TFPI/SERPING1/SFN/SERPINA1/SOX2/CST3/FAM162A/PDCD2/RACK1/APLP2/NKX3-1/PDCD5/SPINK1/PSME2/BIRC3/FURIN/HMGB1/PSME1/PSMD14/C3/SPINT1/SLPI/HDAC1/FIS1/PML/BAK1/SERPINB4/CTSD/PSMA3/VEGFA/SPINT2/CST6/DAPK1/S100A8/PROS1/VCP/PEBP1/TIMP2/YWHAE/ANXA2/CAAP1/PTTG1/TMED10/BST2/NRDC/MTCH1/PICALM/CSNK2A1/AKT1/BAX/WFDC…	90
BP	GO:0008631	intrinsic apoptotic signaling pathway in response to oxidative stress	19/2365	44/18862	4.23461e-07	1.53926e-05	1.18848e-05	HSPB1/PARP1/BCL2/P4HB/PML/SFPQ/ZNF622/TRAP1/PDCD10/STK24/SOD1/PDK1/NFE2L2/AKT1/HIF1A/ARL6IP5/NOL3/MELK/PPIA	19
BP	GO:0070555	response to interleukin-1	52/2365	206/18862	4.53688e-07	1.63091e-05	1.25926e-05	GBP1/PSMB9/FGB/GBP2/RPS27A/PSMB1/LGALS9/PSMB8/PSMA4/TFPI/PSMC4/NKX3-1/PSMA7/PSME2/GBP3/RBMX/PSME1/PSMD14/PSMA5/SOX9/PSMB2/UBE2N/SQSTM1/PSMA3/PSMD8/SKP1/PLCB1/MAP3K8/PSMD1/PSMD7/EDN1/PSMD4/HYAL1/PSMA1/PSMD11/PSMC3/AKAP12/PSMD6/CCL20/PSMD2/HIF1A/CEBPB/VRK2/PSMD3/ANXA1/TNIP2/EGR1/MAPK3/HNMT/HYAL2/ICAM1/NFKBIA	52
BP	GO:0010257	NADH dehydrogenase complex assembly	24/2365	65/18862	4.5715e-07	1.63091e-05	1.25926e-05	NDUFAF4/NDUFB4/NDUFA9/NDUFS2/DMAC1/NDUFV3/NDUFB6/NDUFS5/NDUFS3/BCS1L/NDUFS1/NDUFA2/NDUFA12/NDUFC1/NDUFS6/NDUFA3/NDUFC2/NDUFAF3/NDUFB5/NDUFS8/NDUFAF8/NDUFB10/NDUFB1/COA1	24
BP	GO:0032981	mitochondrial respiratory chain complex I assembly	24/2365	65/18862	4.5715e-07	1.63091e-05	1.25926e-05	NDUFAF4/NDUFB4/NDUFA9/NDUFS2/DMAC1/NDUFV3/NDUFB6/NDUFS5/NDUFS3/BCS1L/NDUFS1/NDUFA2/NDUFA12/NDUFC1/NDUFS6/NDUFA3/NDUFC2/NDUFAF3/NDUFB5/NDUFS8/NDUFAF8/NDUFB10/NDUFB1/COA1	24
BP	GO:0045069	regulation of viral genome replication	28/2365	83/18862	4.59489e-07	1.63091e-05	1.25926e-05	IFI16/ISG15/MX1/LTF/IFITM3/PLSCR1/EIF2AK2/HACD3/BCL2/IFIT1/STAU1/PROX1/SLPI/PPIH/OAS2/CNOT7/SRPK1/TNIP1/APOBEC3G/OAS1/VAPB/BST2/IFITM2/ILF3/FAM111A/ISG20/PPIA/TOP2A	28
BP	GO:0002495	antigen processing and presentation of peptide antigen via MHC class II	32/2365	103/18862	5.99625e-07	2.11587e-05	1.6337e-05	HLA-DRA/CD74/HLA-DRB1/HLA-DPA1/HLA-DPB1/HLA-DMA/CTSL/CLTA/DCTN3/HLA-DMB/KIFAP3/HLA-DQB1/AP2S1/CTSD/AP2M1/SEC24D/CAPZB/CTSV/KIF2A/CLTC/DYNC1LI2/SEC31A/SEC23A/LGMN/KIF2C/CAPZA1/ARF1/CTSS/AP1S1/SEC13/CANX/AP2A1	32
BP	GO:0032388	positive regulation of intracellular transport	54/2365	219/18862	6.13576e-07	2.15251e-05	1.66199e-05	HSP90AB1/TFDP2/SFN/RAN/BCL2/SAE1/YWHAB/PDCD5/CDC42/STOM/KHDRBS1/KIF5B/CD81/RBM22/RDX/ITGB2/YWHAQ/FIS1/CIB1/OAZ2/PIK3R1/TP53/UBE2L3/YWHAZ/CDH1/YWHAE/PDCD10/ANXA2/MAPK8/CHP1/TPR/CPSF6/MAP2/HDAC3/SEC16A/ERBB2/NCBP2/PRKAA1/OAZ1/FZD5/FLNA/NPEPPS/UBE2J2/MYO1C/ARF1/TOMM7/UBL5/EZR/HYAL2/PSEN1/LEPROT/YWHAG/MSN/BCAP31	54
BP	GO:0001736	establishment of planar polarity	36/2365	123/18862	6.24675e-07	2.16626e-05	1.6726e-05	PSMB9/PSMB1/PSMB8/PSMA4/PSMC4/PSMA7/CDC42/PSME2/PLEKHA4/PSME1/PSMD14/PSMA5/PSMB2/AP2S1/PSMA3/PSMD8/CTHRC1/PSMD1/PSMD7/RSPO3/PSMD4/PSMA1/PSMD11/AP2M1/CELSR1/PSMC3/CLTC/PSMD6/SMURF1/PSMD2/FZD5/PSMD3/DVL1/IFT20/RAC1/AP2A1	36
BP	GO:0007164	establishment of tissue polarity	36/2365	123/18862	6.24675e-07	2.16626e-05	1.6726e-05	PSMB9/PSMB1/PSMB8/PSMA4/PSMC4/PSMA7/CDC42/PSME2/PLEKHA4/PSME1/PSMD14/PSMA5/PSMB2/AP2S1/PSMA3/PSMD8/CTHRC1/PSMD1/PSMD7/RSPO3/PSMD4/PSMA1/PSMD11/AP2M1/CELSR1/PSMC3/CLTC/PSMD6/SMURF1/PSMD2/FZD5/PSMD3/DVL1/IFT20/RAC1/AP2A1	36
BP	GO:0048193	Golgi vesicle transport	80/2365	372/18862	7.3012e-07	2.51746e-05	1.94377e-05	AREG/OPTN/SERPINA1/DCTN3/SNX3/RACK1/CD55/RAB6B/INSIG1/SNX2/CREB3L2/TMED3/KIFAP3/SURF4/YIF1A/TMED4/PROS1/VCP/LAMP1/ARL3/GOLPH3L/MYO1B/PITPNB/AMN/RAB34/VAPB/PEF1/TMED10/VAMP5/SEC24D/CAPZB/SEC16A/ARF5/KDELR2/KIF2A/TMED2/SPTBN1/DYNC1LI2/GAK/ERGIC2/SCAMP1/SEC31A/KDELR3/TMED1/ARF4/SEC23A/COPB2/MIA2/GOLGA7/KIF2C/TMED9/CAPZA1/AP3D1/ARF1/HYOU1/YKT6/BET1L/TGFA/SPTAN1/RAB13/CD59/IER3IP1/GOLGA2/TRAPPC4/BET1/…	80
BP	GO:0002504	antigen processing and presentation of peptide or polysaccharide antigen via MHC class II	32/2365	104/18862	7.62947e-07	2.6157e-05	2.01962e-05	HLA-DRA/CD74/HLA-DRB1/HLA-DPA1/HLA-DPB1/HLA-DMA/CTSL/CLTA/DCTN3/HLA-DMB/KIFAP3/HLA-DQB1/AP2S1/CTSD/AP2M1/SEC24D/CAPZB/CTSV/KIF2A/CLTC/DYNC1LI2/SEC31A/SEC23A/LGMN/KIF2C/CAPZA1/ARF1/CTSS/AP1S1/SEC13/CANX/AP2A1	32
BP	GO:0031349	positive regulation of defense response	78/2365	361/18862	8.24386e-07	2.81036e-05	2.16993e-05	IFI16/PSMB9/NUPR1/RPS19/PSMB1/GBP5/MUC1/HSP90AA1/IDO1/PSMB8/PSMA4/XRCC5/PARP9/PLSCR1/OPTN/MUCL1/PSMC4/PSMA7/LPL/KLK5/PSME2/HMGB1/LSM14A/HLA-E/MUC4/PSME1/PSMD14/MUC16/CD81/PSMA5/HCK/C3/PSMB2/CGAS/SFPQ/ITGA2/PSMA3/NMI/PSMD8/SKP1/S100A8/DDT/PSMD1/LAMP1/PSMD7/PSMD4/TNIP1/SNX4/PSMA1/PSMD11/PDCD4/PSMC3/ADAM8/MGST2/EREG/PSMD6/PSMD2/OSMR/HLA-F/CEBPB/PVR/TGM2/PSMD3/ICAM3/MAPK3/HMGB2/CYBA/NECTIN2/TRADD/IL6…	78
BP	GO:0071346	cellular response to interferon-gamma	46/2365	177/18862	8.51427e-07	2.88178e-05	2.22507e-05	GBP1/STAT1/HLA-B/HLA-DRA/RPL13A/GAPDH/HSP90AB1/HLA-DRB1/HLA-DPA1/GBP2/LGALS9/GBP5/HLA-DPB1/GBP4/B2M/TRIM22/PARP9/IRF1/HLA-C/PARP14/CDC42/GBP3/HLA-E/KIF5B/SYNCRIP/HCK/HLA-DQB1/PML/NMI/DAPK1/OAS2/ACTR3/TP53/SP100/IFNGR2/EDN1/OAS1/TRIM38/SUMO1/CLDN1/CCL20/GSN/HLA-F/MYO1C/HLA-A/ICAM1	46
BP	GO:1903793	positive regulation of anion transport	97/2365	478/18862	8.54886e-07	2.88178e-05	2.22507e-05	SPP1/HSP90AB1/HLA-DRB1/FGB/FGG/FGA/SOX4/TFDP2/OXCT1/SFN/MYB/SRI/RAN/BCL2/RACK1/SAE1/NKX3-1/PHPT1/YWHAB/CAV1/PDCD5/CDC42/ABCA7/STOM/CES1/ADAM9/OPN3/KHDRBS1/KIF5B/CD81/RBM22/C3/ITGB2/YWHAQ/FIS1/VPS28/VSNL1/CIB1/OAZ2/PIK3R1/S100A8/TP53/UBE2L3/YWHAZ/CDH1/YWHAE/PDCD10/ANXA2/EDN1/GOLPH3L/MAPK8/CHP1/SNX4/TPR/TMED10/IRS1/CPSF6/ATG5/CA2/ANG/ADAM8/HDAC3/SEC16A/NFE2L2/ERBB2/AKT1/NCBP2/PRKAA1/GRK2/HIF1A/CEBP…	97
BP	GO:0032386	regulation of intracellular transport	76/2365	350/18862	9.28545e-07	3.11269e-05	2.40336e-05	IFI27/HSP90AB1/TFDP2/SFN/RAN/BCL2/SNX3/SAE1/YWHAB/ANGPT1/PDCD5/CDC42/STOM/PPP1CC/INSIG1/APOD/KHDRBS1/KIF5B/CD81/RBM22/RDX/ITGB2/ATP5IF1/YWHAQ/FIS1/CIB1/OAZ2/PKIG/PIK3R1/TP53/SP100/UBE2L3/BARD1/YWHAZ/CDH1/YWHAE/PDCD10/ANXA2/LAMP1/PPP1R12A/MAPK8/CHP1/REEP6/TPR/CPSF6/NUP62/MAP2/HDAC3/SEC16A/ERBB2/NCBP2/PRKAA1/OAZ1/FZD5/FLNA/ERLEC1/UBE2J1/NOLC1/NPEPPS/UBE2J2/MYO1C/ARF1/TOMM7/MAPK3/UBL5/NUCB1/EZR/HYAL…	76
BP	GO:0031396	regulation of protein ubiquitination	51/2365	205/18862	9.35386e-07	3.1183e-05	2.40769e-05	RPL5/DNAJA1/ISG15/HSP90AB1/RPL11/HSP90AA1/SOX4/MAD2L2/IVNS1ABP/RPS2/PLAA/ANGPT1/CAV1/SVBP/BIRC3/RPS7/GTPBP4/TGFBR1/UBE2N/FBXO2/HSPA1A/VPS28/SQSTM1/NMI/PTTG1IP/SKP1/KDM1A/FBXO5/UBE2L3/TOPORS/CHP1/UFL1/PEF1/ATG5/UBE2S/HDAC3/AKT1/INAVA/BMI1/UBXN1/RNF20/XIAP/CDC20/GOLGA2/PSEN1/PPIA/CENPX/PDCD6/TSPO/SIRT7/HSPA5	51
BP	GO:0010972	negative regulation of G2/M transition of mitotic cell cycle	31/2365	100/18862	9.43006e-07	3.12643e-05	2.41396e-05	PSMB9/PSMB1/PSMB8/PSMA4/NOP53/PSMC4/PSMA7/PSME2/PSME1/PSMD14/PSMA5/NAE1/PSMB2/PSMA3/PSMD8/SKP1/SYF2/PSMD1/PSMD7/PSMD4/PSMA1/PSMD11/PSMC3/PSMD6/PSMD2/AURKA/RAD21/PSMD3/CDK1/NABP2/CHMP4C	31
BP	GO:0045785	positive regulation of cell adhesion	88/2365	425/18862	1.14134e-06	3.76331e-05	2.90571e-05	S100A10/HLA-DRA/CD74/HLA-DRB1/HLA-DPA1/FGB/AGR2/FGG/LGALS9/HLA-DPB1/FGA/HSPD1/SOX4/MYB/SOX2/PTN/HSPH1/IGFBP2/ANGPT1/CAV1/CDC42/CD55/HMGB1/HLA-E/ADAM9/IFT74/ADA/P4HB/CD81/CD24/CEACAM6/ITGB2/HLA-DMB/KIFAP3/FSTL3/ITGA3/RHOD/ITGA2/RSU1/CIB1/VEGFA/PIK3R1/CCL28/EFEMP2/LGALS1/NDNF/MAP3K8/HYAL1/ITGAV/C1QBP/DAG1/ADAM8/ERBB2/TJP1/AKT1/ARPC2/PIEZO1/TGFBR2/TPM1/DOCK5/ST3GAL4/FLNA/CRKL/TGM2/RRAS/HES1/NCK1/ANX…	88
BP	GO:0000082	G1/S transition of mitotic cell cycle	63/2365	275/18862	1.18313e-06	3.8799e-05	2.99573e-05	RPS6/CDKN2A/MUC1/SOX4/TFDP2/CDK4/SFN/BCL2/ID2/PCNA/CDKN2B/EIF4EBP1/BTG2/PSME2/RPL26/NASP/PSME1/KHDRBS1/RDX/CUL2/PML/PRIM1/ZNF655/PRMT1/MCM6/TP53/ORC4/ORC3/FBXO5/MCM7/PLCB1/CNOT7/APEX1/POLE4/CCNH/HYAL1/MCM3/MCM2/MCM5/POLE3/EZH2/PLRG1/AKT1/BAX/TYMS/MYC/AURKA/CDC34/CDK2AP2/CNOT2/CDC73/ANXA1/CDK1/CCNB1/CDK16/JADE1/ARID3A/TNKS1BP1/MDM4/CNOT11/RRM2/CCND1/CCND3	63
BP	GO:0010212	response to ionizing radiation	39/2365	142/18862	1.29578e-06	4.22635e-05	3.26324e-05	IFI16/PARP1/XRCC5/RHOB/CXCL10/BCL2/RPL26/NUCKS1/MSH2/ERCC1/EEF1D/RAD1/PML/BAK1/RRM1/DCLRE1C/TP53/KDM1A/RAD51AP1/ITGB6/EYA3/RNF168/YAP1/BABAM2/INIP/BAX/PRKAA1/MYC/GTF2H5/NIPBL/NET1/SWI5/ANXA1/EGR1/NABP2/TNKS1BP1/ICAM1/CCND1/HSPA5	39
BP	GO:0016485	protein processing	54/2365	224/18862	1.30349e-06	4.22863e-05	3.26499e-05	IFI16/FGB/F3/FGG/ASPH/FGA/PARP1/SRGN/CTSL/PLGRKT/CPE/KLK6/CPM/FURIN/CES1/ENO1/STOML2/PLAU/CPD/YME1L1/BAK1/BACE2/FXN/METAP2/IFT52/TMEM98/SPCS1/TMPRSS4/SPCS3/TIMM17A/SDE2/HPN/ADAM8/TMEM208/GSN/RCE1/GLG1/FAM111A/C1R/LGMN/NOL3/APH1A/MMP14/IMMP2L/CASP4/CTSS/MAGEA3/PSEN1/NCSTN/RUNX1/SPG7/HM13/SPCS2/PERP	54
BP	GO:1905477	positive regulation of protein localization to membrane	36/2365	127/18862	1.45253e-06	4.68694e-05	3.61886e-05	AGR2/TFDP2/SFN/BCL2/RACK1/PTN/YWHAB/PDCD5/STOM/KIF5B/CD81/RAB11A/LGALS3/ITGB2/YWHAQ/ITGA3/FIS1/SQSTM1/CIB1/PIK3R1/TP53/YWHAZ/YWHAE/MAPK8/CHP1/ERBB2/AKT1/SPTBN1/EPHA2/ARHGEF16/MYO1C/EZR/ARF6/YWHAG/RER1/SLC5A3	36
BP	GO:1904872	regulation of telomerase RNA localization to Cajal body	11/2365	18/18862	1.60714e-06	5.13593e-05	3.96553e-05	TCP1/CCT2/CCT4/CCT3/CCT7/CCT5/DKC1/RUVBL2/RUVBL1/CCT8/NOP10	11
BP	GO:0031647	regulation of protein stability	66/2365	295/18862	1.6087e-06	5.13593e-05	3.96553e-05	RPL5/GAPDH/HSP90AB1/RPL11/SERF2/HSPD1/HSP90AA1/SOX4/TESC/TCP1/CCT2/CCT4/CCT3/BCL2/NOP53/RPS7/TSPAN1/GTPBP4/CCT7/CD81/CCT5/ATP1B3/HSPA1A/PTGES3/CDC37L1/PIK3R1/PHB2/TP53/PDCD10/HSPA8/LAMP1/ISOC2/CCNH/CHP1/RNF149/PDCL3/CCT8/SUMO1/DPM2/HDAC3/SEC16A/CRTAP/CLU/GSN/SUGT1/AURKA/GLMP/FLNA/GOLGA7/CDC73/CTNND1/TNIP2/TOMM7/FLOT2/DVL1/GNAQ/CTSA/SEL1L/NEDD4L/MDM4/GRN/DPM3/DAD1/HIP1R/ATP1B1/PPIB	66
BP	GO:0051607	defense response to virus	60/2365	260/18862	1.63477e-06	5.1645e-05	3.98759e-05	IFI6/GBP1/IFI16/STAT1/IFI27/IFI44L/ISG15/MX1/HSP90AA1/DDX58/TRIM22/PARP9/IFITM3/IRF1/PLSCR1/EIF2AK2/IFIT3/CXCL10/IFIH1/EXOSC5/BCL2/RTP4/NOP53/SAMHD1/BIRC3/GBP3/LSM14A/IFIT1/CGAS/BNIP3/NT5C3A/PML/ATAD3A/OAS2/IFIT2/PHB2/G3BP1/CNOT7/UNC93B1/APOBEC3G/OAS1/C1QBP/NPLOC4/BST2/DDX60/IFITM2/ILF3/DDIT4/FLNA/DHX36/ISG20/USP15/HYAL2/PCBP2/DNAJC3/SELENOK/RIOK3/UFD1/TSPAN6/TRIM56	60
BP	GO:0140546	defense response to symbiont	60/2365	260/18862	1.63477e-06	5.1645e-05	3.98759e-05	IFI6/GBP1/IFI16/STAT1/IFI27/IFI44L/ISG15/MX1/HSP90AA1/DDX58/TRIM22/PARP9/IFITM3/IRF1/PLSCR1/EIF2AK2/IFIT3/CXCL10/IFIH1/EXOSC5/BCL2/RTP4/NOP53/SAMHD1/BIRC3/GBP3/LSM14A/IFIT1/CGAS/BNIP3/NT5C3A/PML/ATAD3A/OAS2/IFIT2/PHB2/G3BP1/CNOT7/UNC93B1/APOBEC3G/OAS1/C1QBP/NPLOC4/BST2/DDX60/IFITM2/ILF3/DDIT4/FLNA/DHX36/ISG20/USP15/HYAL2/PCBP2/DNAJC3/SELENOK/RIOK3/UFD1/TSPAN6/TRIM56	60
BP	GO:0001738	morphogenesis of a polarized epithelium	39/2365	144/18862	1.89421e-06	5.95294e-05	4.59636e-05	PSMB9/PSMB1/PSMB8/PSMA4/PSMC4/PSMA7/CDC42/PSME2/PLEKHA4/PSME1/PSMD14/PSMA5/PSMB2/AP2S1/PSMA3/PSMD8/CTHRC1/PSMD1/LAMA3/LAMA5/PSMD7/RSPO3/PSMD4/PSMA1/PSMD11/AP2M1/CELSR1/PSMC3/CLTC/PSMD6/SMURF1/PSMD2/FZD5/PSMD3/DVL1/IFT20/RAC1/MSN/AP2A1	39
BP	GO:0045088	regulation of innate immune response	69/2365	315/18862	2.09542e-06	6.55116e-05	5.05825e-05	IFI16/STAT1/HLA-B/PSMB9/RPS19/HSP90AB1/PSMB1/LGALS9/GBP5/MUC1/HSP90AA1/PSMB8/PSMA4/XRCC5/PARP9/IRF1/PLSCR1/SERPING1/PARP14/MUCL1/PSMC4/PSMA7/SAMHD1/PSME2/BIRC3/HMGB1/LSM14A/HLA-E/MUC4/PSME1/PSMD14/MUC16/PSMA5/YTHDF2/HCK/PSMB2/CGAS/SFPQ/SERPINB4/PSMA3/NMI/PSMD8/CEACAM1/SKP1/CNOT7/PSMD1/LAMP1/IFNGR2/PSMD7/PSMD4/PSMA1/PSMD11/PSMC3/SUMO1/ADAM8/EREG/PSMD6/PSMD2/HLA-F/PVR/PSMD3/ICAM3/HMGB2/NECTIN2/XIAP…	69
BP	GO:1904851	positive regulation of establishment of protein localization to telomere	8/2365	10/18862	2.14992e-06	6.68693e-05	5.16308e-05	TCP1/CCT2/CCT4/CCT3/CCT7/CCT5/DKC1/CCT8	8
BP	GO:0006260	DNA replication	63/2365	280/18862	2.25246e-06	6.96991e-05	5.38158e-05	S100A11/CACYBP/NFIA/NFIB/PCNA/SAMHD1/FAM111B/HMGA1/CDC42/NASP/GTPBP4/PTMS/NUCKS1/RTF2/STOML2/JUN/PPP2R1A/RAD1/MMS22L/ING4/NAP1L1/PRIM1/RRM1/SMC3/EHMT2/MCM6/TP53/GINS2/ORC4/ORC3/ESCO1/FBXO5/MCM7/BARD1/POLE4/ID3/MCM3/LIG1/MCM2/MCM5/SSRP1/POLD4/SDE2/POLE3/RBBP4/RFC4/PPP2CA/KIN/RFC1/EREG/FEN1/RPAIN/RFC3/CDC34/FAM111A/RECQL/CDK1/SET/ZBTB38/CENPX/RAC1/SIRT7/RRM2	63
BP	GO:0046902	regulation of mitochondrial membrane permeability	25/2365	75/18862	2.39797e-06	7.38231e-05	5.7e-05	TFDP2/SFN/BCL2/YWHAB/DYNLT1/EYA2/CHCHD10/ATP5IF1/BNIP3/YWHAQ/HSPA1A/BAK1/TP53/CNP/SLC25A5/YWHAZ/YWHAE/MAPK8/HEBP2/BAX/NOL3/RTL10/HIP1R/YWHAG/SPG7	25
BP	GO:0006446	regulation of translational initiation	26/2365	80/18862	2.60292e-06	7.94807e-05	6.13683e-05	RPL13A/NPM1/HSPB1/EIF2AK2/EIF3E/PAIP1/EIF4EBP1/EIF3K/KHDRBS1/YTHDF2/CSDE1/CDC123/EIF4A2/POLR2G/TPR/PPP1CA/PPP1R15A/TMED2/NCBP2/PAIP2/EIF5B/EIF5/NCK1/EIF1/EIF3B/DNAJC3	26
BP	GO:0051604	protein maturation	65/2365	293/18862	2.60808e-06	7.94807e-05	6.13683e-05	IFI16/FGB/F3/FGG/ASPH/FGA/HSPD1/SOX4/TESC/PARP1/ERO1A/SRGN/CTSL/PLGRKT/CPE/KLK6/CPM/FURIN/CES1/ENO1/STOML2/PLAU/CPD/YME1L1/NAA10/BAK1/BACE2/NAA50/TSPAN15/FXN/METAP2/IFT52/TMEM98/SPCS1/TMPRSS4/SPCS3/TIMM17A/SDE2/HPN/GALNT2/ADAM8/TMEM208/GSN/RCE1/GLG1/LMF2/FAM111A/C1R/LGMN/CISD3/NOL3/APH1A/MMP14/PRDX4/IMMP2L/CASP4/CTSS/MAGEA3/PSEN1/NCSTN/RUNX1/SPG7/HM13/SPCS2/PERP	65
BP	GO:1900180	regulation of protein localization to nucleus	36/2365	130/18862	2.64793e-06	8.02896e-05	6.19929e-05	HSP90AB1/TCP1/PARP1/PARP9/CCT2/CCT4/CCT3/GLUL/RAN/ANGPT1/APOD/CCT7/RBM22/CCT5/DKC1/PKIG/PIK3R1/CDH1/TMEM98/CHP1/NVL/TPR/YAP1/CCT8/NUP62/HDAC3/BYSL/TRIM29/AKT1/FLNA/NMD3/NOLC1/CDK1/HYAL2/PSEN1/CD2AP	36
BP	GO:0051168	nuclear export	49/2365	201/18862	2.82519e-06	8.5236e-05	6.58121e-05	IFI27/NPM1/EIF5A/SSB/HNRNPA1/SFN/SRRM1/RAN/SRSF3/RAE1/ALKBH5/CDC40/MAGOH/CSE1L/KHDRBS1/RBM22/MAGOHB/SRSF7/HSPA9/DESI1/SLU7/TP53/SP100/BARD1/YWHAE/CHP1/PHAX/TPR/SRSF2/CPSF6/NUP62/DDX39A/NCBP2/RBM8A/UPF2/SMURF1/SRSF4/HNRNPA2B1/SRSF11/NMD3/FYTTD1/AGFG1/AHCYL1/SIRT7/PTPN11/AKAP13/THOC6/SEC13/SLBP	49
BP	GO:0090316	positive regulation of intracellular protein transport	45/2365	179/18862	2.95341e-06	8.8661e-05	6.84566e-05	HSP90AB1/TFDP2/SFN/RAN/BCL2/SAE1/YWHAB/PDCD5/CDC42/STOM/KIF5B/CD81/RBM22/ITGB2/YWHAQ/FIS1/CIB1/OAZ2/PIK3R1/TP53/UBE2L3/YWHAZ/CDH1/YWHAE/PDCD10/MAPK8/CHP1/TPR/HDAC3/SEC16A/ERBB2/PRKAA1/OAZ1/FZD5/FLNA/NPEPPS/UBE2J2/MYO1C/TOMM7/UBL5/HYAL2/PSEN1/LEPROT/YWHAG/BCAP31	45
BP	GO:0048024	regulation of mRNA splicing, via spliceosome	30/2365	100/18862	2.99767e-06	8.95441e-05	6.91385e-05	HNRNPA1/SRSF3/SRSF10/RBMX/MAGOH/KHDRBS1/SRSF7/WTAP/NCL/FXR1/TIA1/SRPK1/HSPA8/THRAP3/HNRNPK/RBMXL1/C1QBP/RBM42/HNRNPU/PRPF19/PUF60/RBM8A/SNRNP70/SRSF4/DDX5/HNRNPA2B1/TRA2B/CELF1/SAP18/SON	30
BP	GO:0000209	protein polyubiquitination	72/2365	337/18862	3.29706e-06	9.80023e-05	7.56691e-05	PSMB9/UBE2L6/IFI27/RPS27A/PSMB1/PSMB8/PSMA4/TRIM22/RNF183/RNF114/BCL2/PLAA/PSMC4/PSMA7/PSME2/UBE2Q2/PSME1/PSMD14/PSMA5/PSMB2/UBE2N/FBXO2/LMO7/HERC6/UBE2D2/PSMA3/NMI/PSMD8/SKP1/FBXW5/UBE2L3/BARD1/WSB1/PSMD1/PSMD7/PSMD4/TOPORS/PSMA1/PSMD11/TRIM38/RNF168/PSMC3/UBE2T/ANAPC11/UBE2S/PRPF19/TMEM129/PSMD6/WWP1/AMFR/SMURF1/PSMD2/CDC34/UBE2Q1/UBE2J1/RNF115/NPEPPS/PSMD3/UBE2J2/UBE2E3/UBE2H/RNF20/XIAP/MIB2/N…	72
BP	GO:0002483	antigen processing and presentation of endogenous peptide antigen	11/2365	19/18862	3.3828e-06	9.81336e-05	7.57705e-05	HLA-B/HLA-DRA/AZGP1/HLA-DRB1/TAP1/B2M/HLA-C/HLA-E/TAP2/HLA-F/HLA-A	11
BP	GO:0090670	RNA localization to Cajal body	11/2365	19/18862	3.3828e-06	9.81336e-05	7.57705e-05	TCP1/CCT2/CCT4/CCT3/CCT7/CCT5/DKC1/RUVBL2/RUVBL1/CCT8/NOP10	11
BP	GO:0090671	telomerase RNA localization to Cajal body	11/2365	19/18862	3.3828e-06	9.81336e-05	7.57705e-05	TCP1/CCT2/CCT4/CCT3/CCT7/CCT5/DKC1/RUVBL2/RUVBL1/CCT8/NOP10	11
BP	GO:0090672	telomerase RNA localization	11/2365	19/18862	3.3828e-06	9.81336e-05	7.57705e-05	TCP1/CCT2/CCT4/CCT3/CCT7/CCT5/DKC1/RUVBL2/RUVBL1/CCT8/NOP10	11
BP	GO:0090685	RNA localization to nucleus	11/2365	19/18862	3.3828e-06	9.81336e-05	7.57705e-05	TCP1/CCT2/CCT4/CCT3/CCT7/CCT5/DKC1/RUVBL2/RUVBL1/CCT8/NOP10	11
BP	GO:0009060	aerobic respiration	27/2365	86/18862	3.55247e-06	0.000102563	7.91902e-05	UQCRH/IDH2/MDH1/SUCLG1/NOP53/COX6B1/FH/COX5A/IDH3B/BNIP3/SDHB/NDUFA4/FXN/IDH3G/VCP/SHMT2/UQCRC2/SURF1/IDH3A/COX7A2L/COX5B/HIF1A/COX7B/COX7C/COX6A1/MTFR1/NDUFS8	27
BP	GO:0001732	formation of cytoplasmic translation initiation complex	10/2365	16/18862	3.67685e-06	0.000105275	8.12848e-05	EIF3E/EIF3M/EIF3K/EIF3D/EIF3I/EIF3L/EIF5/EIF3F/EIF2S2/EIF3B	10
BP	GO:1902750	negative regulation of cell cycle G2/M phase transition	32/2365	111/18862	3.68132e-06	0.000105275	8.12848e-05	PSMB9/PSMB1/PSMB8/PSMA4/NOP53/PSMC4/PSMA7/PSME2/PSME1/PSMD14/PSMA5/NAE1/PSMB2/PSMA3/PSMD8/SKP1/SYF2/PSMD1/PSMD7/PSMD4/PSMA1/PSMD11/PSMC3/BABAM2/PSMD6/PSMD2/AURKA/RAD21/PSMD3/CDK1/NABP2/CHMP4C	32
BP	GO:0033108	mitochondrial respiratory chain complex assembly	30/2365	101/18862	3.75779e-06	0.000106955	8.25817e-05	NDUFAF4/NDUFB4/NDUFA9/NDUFS2/DMAC1/SLC25A33/NDUFV3/NDUFB6/NDUFS5/NDUFS3/BCS1L/UQCRFS1/NDUFS1/SURF1/SMIM20/NDUFA2/NDUFA12/NDUFC1/NDUFS6/NDUFA3/NDUFC2/NDUFAF3/NDUFB5/NDUFS8/IMMP2L/NDUFAF8/NDUFB10/COA3/NDUFB1/COA1	30
BP	GO:0045071	negative regulation of viral genome replication	20/2365	54/18862	3.87325e-06	0.000109527	8.45678e-05	IFI16/ISG15/MX1/LTF/IFITM3/PLSCR1/EIF2AK2/IFIT1/PROX1/SLPI/OAS2/SRPK1/TNIP1/APOBEC3G/OAS1/BST2/IFITM2/ILF3/FAM111A/ISG20	20
BP	GO:0019883	antigen processing and presentation of endogenous antigen	13/2365	26/18862	3.88446e-06	0.000109527	8.45678e-05	HLA-B/HLA-DRA/AZGP1/CD74/HLA-DRB1/TAP1/B2M/HLA-C/HLA-E/TAP2/ATG5/HLA-F/HLA-A	13
BP	GO:0031099	regeneration	47/2365	192/18862	3.95917e-06	0.000111115	8.57933e-05	SPP1/NREP/NNMT/CDK4/SOX2/BCL2/PTN/CD9/PCNA/KLK6/APOD/CD81/BAK1/UCP2/KLK8/GSTP1/KLF5/ADAM15/LPIN1/PTPN12/CHL1/ATIC/EZH2/YAP1/STK24/DAG1/CERS2/CLDN1/TYMS/GSN/UPF2/AURKA/TGFBR2/CEBPB/FLNA/PRPS2/PNPT1/ANXA1/ADM/CCNB1/ANXA3/MDK/GRN/RUNX1/TSPO/PTPRF/CCND1	47
BP	GO:0044783	G1 DNA damage checkpoint	22/2365	63/18862	4.00747e-06	0.00011195	8.6438e-05	MUC1/SOX4/TFDP2/SFN/PCNA/BTG2/RPL26/PML/PRMT1/TP53/CNOT7/WAC/BAX/AURKA/CNOT2/CDK1/CCNB1/ARID3A/TNKS1BP1/MDM4/CNOT11/CCND1	22
BP	GO:0051100	negative regulation of binding	41/2365	159/18862	4.05854e-06	0.000112854	8.71361e-05	IFI16/HDAC2/MAD2L2/B2M/SRI/RACK1/NKX3-1/TMSB4X/CAV1/GTPBP4/IFIT1/JUN/ID1/SLPI/HEY1/ZNF462/IFIT2/RUVBL2/ADAM15/KDM1A/DTNBP1/SP100/LRPAP1/DDIT3/MAPK8/TMC8/PPP1CA/SUMO1/MAP2/AKT1/BAX/AURKA/ATP2A2/DVL1/MAPK3/CSNK1E/TMBIM6/GOLGA2/PSEN1/NFKBIA/PTPRF	41
BP	GO:0042176	regulation of protein catabolic process	79/2365	383/18862	4.60945e-06	0.000127584	9.851e-05	RPL5/EEF1A1/NUPR1/HSP90AB1/RPL11/TIMP1/HSP90AA1/MAD2L2/CST3/SNX3/RACK1/NOP53/PSMC4/CAV1/PSME2/RPS7/FURIN/ADAM9/PSME1/PSMD14/CD81/SDCBP/RDX/SMARCC1/SOX9/ATP5IF1/DESI1/HSPA1A/VPS28/PML/OAZ2/PTTG1IP/CSNK1A1/VCP/BARD1/ATRAID/TIMP2/CDH1/ANXA2/PSMD1/SF3B3/UFL1/PDCL3/GBA/LPCAT1/WAC/NUB1/C4BPB/PSMC3/SUMO1/SNX9/ADAM8/NRDC/LAPTM4B/NFE2L2/CSNK2A1/AKT1/CLU/WWP1/SMURF1/PSMD2/AURKA/SNRNP70/OAZ1/FLNA/TMEM259/UB…	79
BP	GO:0018208	peptidyl-proline modification	21/2365	59/18862	4.66909e-06	0.000128645	9.9329e-05	ERO1A/FKBP4/FKBP2/P4HB/PPIH/PPIL4/CWC27/FKBP11/P3H2/PPIG/P4HA1/CRTAP/PPIC/FKBP5/PRDX4/NTMT1/PPIA/FKBP9/EGLN3/PPIB/PTPA	21
BP	GO:0007568	aging	66/2365	304/18862	4.74713e-06	0.000130201	0.00010053	YBX1/KYNU/CDKN2A/NPM1/TIMP1/ERO1A/B2M/CACYBP/TBX3/BCL2/ID2/IGFBP2/CDKN2B/HMGA1/ADA/APOD/MSH2/JUN/ITGB2/ERCC1/CGAS/LOXL2/PML/BAK1/UCP2/CD68/MSH6/TP53/CNP/FBXO5/TIMP2/APEX1/EDN1/SEC63/GBA/PDCD4/YPEL3/NUP62/DAG1/SOD1/CLDN1/NFE2L2/PICALM/AKT1/TYMS/AMFR/GSN/TGFBR2/ROMO1/RSL1D1/PNPT1/JUND/ADM/GCLM/EEF2/MAPK3/ATP2B1/HYAL2/MIF/ICAM1/PSEN1/TSPO/KRT16/NQO1/LMNA/SMC5	66
BP	GO:0051085	chaperone cofactor-dependent protein refolding	15/2365	34/18862	5.0652e-06	0.000138296	0.00010678	CD74/ERO1A/HSPE1/HSPH1/HSPA9/DNAJC7/HSPA1A/PTGES3/HSPA8/DNAJB1/GAK/HSPA6/ST13/SDF2/HSPA5	15
BP	GO:1905475	regulation of protein localization to membrane	47/2365	194/18862	5.3509e-06	0.000143228	0.000110589	GBP1/AGR2/TFDP2/SFN/BCL2/RACK1/PTN/YWHAB/PDCD5/STOM/KIF5B/CD81/RAB11A/LGALS3/ITGB2/YWHAQ/ITGA3/FIS1/SQSTM1/CIB1/PIK3R1/SLC7A11/TP53/YWHAZ/YWHAE/MAPK8/CHP1/TMBIM1/AP2M1/DAG1/PICALM/ERBB2/CLTC/AKT1/SPTBN1/GSN/EPHA2/ARHGEF16/CRKL/MYO1C/MMP14/EZR/ARF6/YWHAG/RER1/VTI1B/SLC5A3	47
BP	GO:0001836	release of cytochrome c from mitochondria	20/2365	55/18862	5.37302e-06	0.000143228	0.000110589	IFI6/TNFSF10/SFN/BCL2/FAM162A/PDCD5/JUN/BNIP3/FIS1/BAK1/FXN/TP53/TIMM50/AKT1/BAX/CLU/GGCT/NOL3/BIK/PLAUR	20
BP	GO:0006120	mitochondrial electron transport, NADH to ubiquinone	20/2365	55/18862	5.37302e-06	0.000143228	0.000110589	NDUFB4/NDUFA9/NDUFS2/NDUFV3/NDUFB6/NDUFA4/NDUFS5/NDUFS3/NDUFS1/DNAJC15/NDUFA2/NDUFA12/NDUFC1/NDUFS6/NDUFA3/NDUFC2/NDUFB5/NDUFS8/NDUFB10/NDUFB1	20
BP	GO:0097345	mitochondrial outer membrane permeabilization	20/2365	55/18862	5.37302e-06	0.000143228	0.000110589	TFDP2/SFN/BCL2/YWHAB/EYA2/CHCHD10/ATP5IF1/BNIP3/YWHAQ/HSPA1A/BAK1/TP53/SLC25A5/YWHAZ/YWHAE/MAPK8/BAX/RTL10/HIP1R/YWHAG	20
BP	GO:0032507	maintenance of protein location in cell	22/2365	64/18862	5.38827e-06	0.000143228	0.000110589	SRGN/TMSB4X/CAV1/INSIG1/CHCHD10/PML/SKP1/SP100/BARD1/TOPORS/ARL2BP/HNRNPU/DBN1/KDELR2/AKT1/GSN/KDELR3/TSPO/RER1/GPAA1/GOLPH3/HSPA5	22
BP	GO:0035794	positive regulation of mitochondrial membrane permeability	22/2365	64/18862	5.38827e-06	0.000143228	0.000110589	TFDP2/SFN/BCL2/YWHAB/EYA2/CHCHD10/ATP5IF1/BNIP3/YWHAQ/HSPA1A/BAK1/TP53/SLC25A5/YWHAZ/YWHAE/MAPK8/HEBP2/BAX/RTL10/HIP1R/YWHAG/SPG7	22
BP	GO:0034660	ncRNA metabolic process	96/2365	492/18862	5.65652e-06	0.000149544	0.000115465	RPL5/RPS6/RPS19/RPS8/RPL11/FBL/RPL35A/RPS14/RPS9/RPS2/SSB/NOP58/EXOSC5/RAN/CDKAL1/RPF2/NOP53/RPL10A/NOL8/IMP4/NIFK/RPP40/RPL26/RPS7/WDR12/GTPBP4/RCL1/RPS21/EXOSC3/RARS2/DDX18/WDR3/PA2G4/XRN2/TP53RK/FARSB/MPHOSPH10/DKC1/ERI3/WBP11/MRPL44/TRMT61B/RPL35/TRMT6/INTS11/RPS16/WDR75/RTCB/TRMT10C/RPL14/SRFBP1/UTP11/UTP4/NOP56/WDR43/INTS10/TPRKB/NOB1/RPF1/PPA1/NVL/DCAF13/EXOSC9/RPL7L1/DDX27/EXOSC8/NOL10/BM…	96
BP	GO:0000723	telomere maintenance	41/2365	161/18862	5.67543e-06	0.000149544	0.000115465	HSP90AB1/HSP90AA1/TCP1/PARP1/XRCC5/CCT2/CCT4/HNRNPA1/CCT3/PCNA/CCT7/CCT5/ERCC1/PTGES3/PML/PKIB/PRIM1/DKC1/DCLRE1C/SP100/APEX1/HNRNPC/POLE4/TPRKB/POLD4/POLE3/CCT8/HNRNPU/RFC4/RFC1/MYC/FEN1/HNRNPA2B1/RFC3/DHX36/RIF1/NABP2/MAPK3/TNKS1BP1/NOP10/SMC5	41
BP	GO:0051817	modulation of process of other organism involved in symbiotic interaction	29/2365	98/18862	5.88196e-06	0.000154312	0.000119147	IFI27/LTF/EIF2AK2/CAV2/SMARCB1/STOM/NUCKS1/POU2F3/RRAGA/JUN/HDAC1/TAF11/PHB2/KPNA3/ANXA2/HSPA8/TNIP1/VAPB/SMARCA4/HPN/ATG5/PSMC3/DAG1/RXRA/TYMS/SUGT1/HYAL2/RAB9A/PPIB	29
BP	GO:0070646	protein modification by small protein removal	65/2365	300/18862	5.99074e-06	0.000156485	0.000120825	PSMB9/RPS27A/PSMB1/PSMB8/PSMA4/DDX58/IFIH1/SNX3/NOP53/PSMC4/PSMA7/PSME2/BIRC3/TFPT/PSME1/PSMD14/PSMA5/TGFBR1/PSMB2/DESI1/PSMA3/TOMM20/PSMD8/USP1/RUVBL1/TP53/VCP/BARD1/SHMT2/ACTL6A/UCHL3/PSMD1/PSMD7/PSMD4/TNIP1/PSMA1/PSMD11/COPS3/PSMC3/USP22/BABAM2/USP39/PSMD6/USP48/RCE1/MYC/PSMD2/HIF1A/NEDD8/USP53/UBXN1/EIF3F/PSMD3/CDK1/ADRM1/TNIP2/USP15/CDC20/MDM4/NFKBIA/JOSD2/UFD1/COPS6/USP16/SMAD2	65
BP	GO:0007050	cell cycle arrest	54/2365	235/18862	6.06122e-06	0.000157644	0.000121719	CDKN2A/HSP90AB1/MUC1/SOX4/TFDP2/IRF1/CDK4/SFN/SOX2/ID2/NKX3-1/RPRM/PCNA/MLF1/CDKN2B/BTG2/SLC25A33/RPL26/RRAGD/RRAGA/DUSP1/MSH2/TGFBR1/CDC123/ING4/PML/MCPH1/PRMT1/TP53/BARD1/CNOT7/DDIT3/SDE2/PPP1R15A/BAX/PRKAA1/MYC/AURKA/PNPT1/CNOT2/CDK1/CCNB1/LAMTOR3/LAMTOR4/LAMTOR1/ARID3A/TNKS1BP1/MIF/MDM4/CNOT11/GADD45GIP1/LAMTOR2/DHCR24/CCND1	54
BP	GO:2001244	positive regulation of intrinsic apoptotic signaling pathway	21/2365	60/18862	6.33978e-06	0.000164181	0.000126767	NUPR1/RPL11/RNF183/BCL2/RACK1/NKX3-1/CAV1/RPL26/RPS7/FIS1/SFPQ/BCLAF1/S100A8/TP53/DDIT3/SOD1/BAX/NCK1/STYXL1/S100A9/BCAP31	21
BP	GO:0016579	protein deubiquitination	62/2365	283/18862	6.71978e-06	0.000173279	0.000133791	PSMB9/RPS27A/PSMB1/PSMB8/PSMA4/DDX58/IFIH1/SNX3/NOP53/PSMC4/PSMA7/PSME2/BIRC3/TFPT/PSME1/PSMD14/PSMA5/TGFBR1/PSMB2/PSMA3/TOMM20/PSMD8/USP1/RUVBL1/TP53/VCP/BARD1/SHMT2/ACTL6A/UCHL3/PSMD1/PSMD7/PSMD4/TNIP1/PSMA1/PSMD11/PSMC3/USP22/BABAM2/USP39/PSMD6/USP48/RCE1/MYC/PSMD2/HIF1A/NEDD8/USP53/UBXN1/EIF3F/PSMD3/CDK1/ADRM1/TNIP2/USP15/CDC20/MDM4/NFKBIA/JOSD2/UFD1/USP16/SMAD2	62
BP	GO:0042542	response to hydrogen peroxide	36/2365	135/18862	6.8025e-06	0.000174665	0.000134862	HDAC2/RHOB/MYB/BCL2/RACK1/PCNA/ADAM9/ADA/SDC1/DUSP1/MET/JUN/BNIP3/BAK1/FXN/ZNF580/TRAP1/APEX1/PDCD10/EZH2/STK24/SOD1/NFE2L2/PPP2CB/PRKAA1/PLEKHA1/OSER1/PYCR1/HBB/NET1/ANXA1/EEF2/TXNIP/COL1A1/CAPN2/NQO1	36
BP	GO:0031397	negative regulation of protein ubiquitination	25/2365	79/18862	6.88988e-06	0.000176159	0.000136015	RPL5/DNAJA1/ISG15/RPL11/SOX4/MAD2L2/IVNS1ABP/PLAA/CAV1/SVBP/RPS7/GTPBP4/HSPA1A/VPS28/SQSTM1/FBXO5/CHP1/UFL1/ATG5/AKT1/UBXN1/PSEN1/PPIA/TSPO/SIRT7	25
BP	GO:0070203	regulation of establishment of protein localization to telomere	8/2365	11/18862	7.00975e-06	0.000176974	0.000136645	TCP1/CCT2/CCT4/CCT3/CCT7/CCT5/DKC1/CCT8	8
BP	GO:1904869	regulation of protein localization to Cajal body	8/2365	11/18862	7.00975e-06	0.000176974	0.000136645	TCP1/CCT2/CCT4/CCT3/CCT7/CCT5/DKC1/CCT8	8
BP	GO:1904871	positive regulation of protein localization to Cajal body	8/2365	11/18862	7.00975e-06	0.000176974	0.000136645	TCP1/CCT2/CCT4/CCT3/CCT7/CCT5/DKC1/CCT8	8
BP	GO:0048525	negative regulation of viral process	27/2365	89/18862	7.3094e-06	0.000183221	0.000141468	IFI16/STAT1/ISG15/MX1/LTF/IFITM3/LY6E/PLSCR1/EIF2AK2/SNX3/IFIT1/PROX1/SLPI/PML/OAS2/SRPK1/TNIP1/APOBEC3G/OAS1/ZFP36/BST2/IFITM2/ILF3/GSN/FAM111A/ISG20/PPIA	27
BP	GO:0006458	'de novo' protein folding	17/2365	43/18862	7.35808e-06	0.000183221	0.000141468	CD74/HSPD1/ERO1A/HSPE1/CCT2/HSPH1/HSPA9/DNAJC7/HSPA1A/PTGES3/HSPA8/DNAJB1/GAK/HSPA6/ST13/SDF2/HSPA5	17
BP	GO:0045454	cell redox homeostasis	17/2365	43/18862	7.35808e-06	0.000183221	0.000141468	ERO1A/GCLC/PRDX2/APEX1/TXN2/GSR/DDIT3/TXNRD2/NFE2L2/SLC11A1/PRDX5/PRDX1/SELENOS/CYBA/PRDX4/TXNRD1/NQO1	17
BP	GO:0006977	DNA damage response, signal transduction by p53 class mediator resulting in cell cycle arrest	20/2365	56/18862	7.37864e-06	0.000183221	0.000141468	MUC1/SOX4/TFDP2/SFN/PCNA/BTG2/RPL26/PML/PRMT1/TP53/CNOT7/BAX/AURKA/CNOT2/CDK1/CCNB1/ARID3A/TNKS1BP1/MDM4/CNOT11	20
BP	GO:0010565	regulation of cellular ketone metabolic process	45/2365	185/18862	7.51325e-06	0.000185799	0.000143458	PSMB9/CD74/PSMB1/AKR1C3/PSMB8/PSMA4/COQ3/PSMC4/PSMA7/CAV1/PSME2/CES1/INSIG1/PSME1/PSMD14/PSMA5/PROX1/SOX9/PSMB2/PSMA3/OAZ2/PSMD8/CEACAM1/SLC7A11/PSMD1/PSMD7/PSMD4/PSMA1/PSMD11/IRS1/APOC1/PSMC3/PDK1/AKT1/PSMD6/PSMD2/OAZ1/PSMD3/ANXA1/ADM/EGR1/IRS2/NCOR2/LPGAT1/NQO1	45
BP	GO:0051084	'de novo' posttranslational protein folding	16/2365	39/18862	7.75047e-06	0.000190883	0.000147384	CD74/ERO1A/HSPE1/CCT2/HSPH1/HSPA9/DNAJC7/HSPA1A/PTGES3/HSPA8/DNAJB1/GAK/HSPA6/ST13/SDF2/HSPA5	16
BP	GO:1901030	positive regulation of mitochondrial outer membrane permeabilization involved in apoptotic signaling pathway	15/2365	35/18862	7.83858e-06	0.000192268	0.000148453	TFDP2/SFN/BCL2/YWHAB/CHCHD10/ATP5IF1/YWHAQ/BAK1/TP53/YWHAZ/YWHAE/MAPK8/BAX/HIP1R/YWHAG	15
BP	GO:0016050	vesicle organization	71/2365	339/18862	7.96486e-06	0.000194575	0.000150234	S100A10/MX1/TAP1/SRGN/AREG/SERPINA1/BCL2/SNX3/CAV2/CAV1/INSIG1/SAMD9/VPS4B/SDC1/KIF5B/SDCBP/RAB11A/VPS28/SQSTM1/TAP2/FNBP1L/TBPL1/DTNBP1/GNAI3/FBXO5/ANXA2/GOLPH3L/CHP1/RAB34/AP2M1/VAPB/PEF1/TMED10/SCARB2/SEC24D/VTA1/LAPTM4B/SEC16A/PICALM/TMED2/SEC31A/SEC23A/TMED9/ANXA1/CLCN3/AP3D1/ARF1/NECTIN2/SDC4/LAMTOR1/TGFA/SNAP29/HOOK3/WASL/RAB13/CD59/GOLGA2/TRAPPC4/CHMP1B/BET1/LMAN1/PDCD6/VTI1B/CHMP4C/CSNK1…	71
BP	GO:1990173	protein localization to nucleoplasm	9/2365	14/18862	8.34586e-06	0.00020306	0.000156786	TCP1/CCT2/CCT4/CCT3/NOP53/CCT7/CCT5/DKC1/CCT8	9
BP	GO:0006626	protein targeting to mitochondrion	29/2365	100/18862	9.1027e-06	0.000220585	0.000170317	HSPD1/HSP90AA1/SAE1/PDCD5/SLC25A6/HSPA4/ATP5IF1/FIS1/TOMM20/UBE2L3/TIMM10/TIMM17A/DNAJC15/TIMM17B/TIMM50/PRKAA1/ROMO1/FZD5/TOMM5/NPEPPS/UBE2J2/TOMM7/UBL5/IMMP2L/LMAN1/LEPROT/TIMM8B/TSPO/BCAP31	29
BP	GO:0090559	regulation of membrane permeability	27/2365	90/18862	9.20645e-06	0.000222207	0.000171569	TFDP2/SFN/BCL2/YWHAB/DYNLT1/EYA2/CHCHD10/ATP5IF1/BNIP3/YWHAQ/HSPA1A/BAK1/TP53/CNP/SLC25A5/YWHAZ/YWHAE/MAPK8/HEBP2/LAPTM4B/BAX/NOL3/RTL10/F11R/HIP1R/YWHAG/SPG7	27
BP	GO:0035567	non-canonical Wnt signaling pathway	39/2365	153/18862	9.26536e-06	0.000222738	0.000171979	PSMB9/PSMB1/PSMB8/PSMA4/PSMC4/PSMA7/CDC42/PSME2/PLEKHA4/PSME1/PSMD14/PSMA5/PSMB2/AP2S1/PSMA3/PSMD8/CTHRC1/PLCB1/PSMD1/PSMD7/RSPO3/PSMD4/PSMA1/PSMD11/AP2M1/CELSR1/PSMC3/CLTC/PSMD6/SMURF1/PSMD2/FZD5/PSMD3/DVL1/CSNK1E/RAC1/CSNK1D/CTNNB1/AP2A1	39
BP	GO:0044843	cell cycle G1/S phase transition	64/2365	298/18862	9.49517e-06	0.000227357	0.000175546	RPS6/CDKN2A/MUC1/SOX4/TFDP2/CDK4/SFN/BCL2/ID2/PCNA/CDKN2B/EIF4EBP1/BTG2/PSME2/RPL26/NASP/PSME1/KHDRBS1/RDX/CUL2/PML/PRIM1/ZNF655/PRMT1/MCM6/PHB2/TP53/ORC4/ORC3/FBXO5/MCM7/PLCB1/CNOT7/APEX1/POLE4/CCNH/HYAL1/MCM3/MCM2/MCM5/POLE3/EZH2/PLRG1/AKT1/BAX/TYMS/MYC/AURKA/CDC34/CDK2AP2/CNOT2/CDC73/ANXA1/CDK1/CCNB1/CDK16/JADE1/ARID3A/TNKS1BP1/MDM4/CNOT11/RRM2/CCND1/CCND3	64
BP	GO:0050852	T cell receptor signaling pathway	48/2365	204/18862	9.9713e-06	0.000237471	0.000183355	GBP1/HLA-DRA/PSMB9/HLA-DRB1/HLA-DPA1/PSMB1/HLA-DPB1/PSMB8/PSMA4/PSMC4/PSMA7/PHPT1/PSME2/PSME1/ADA/PSMD14/KHDRBS1/CD81/PSMA5/STOML2/LGALS3/PSMB2/UBE2N/HLA-DQB1/PSMA3/PSMD8/CEACAM1/SKP1/PIK3R1/PSMD1/PSMD7/PSMD4/EIF2B3/PSMA1/PSMD11/PSMC3/PSMD6/PSMD2/BTN3A2/CRKL/NCK1/PSMD3/NECTIN2/EZR/TNFRSF21/HLA-A/PSEN1/RBCK1	48
BP	GO:0072431	signal transduction involved in mitotic G1 DNA damage checkpoint	20/2365	57/18862	1.00357e-05	0.000237471	0.000183355	MUC1/SOX4/TFDP2/SFN/PCNA/BTG2/RPL26/PML/PRMT1/TP53/CNOT7/BAX/AURKA/CNOT2/CDK1/CCNB1/ARID3A/TNKS1BP1/MDM4/CNOT11	20
BP	GO:1902400	intracellular signal transduction involved in G1 DNA damage checkpoint	20/2365	57/18862	1.00357e-05	0.000237471	0.000183355	MUC1/SOX4/TFDP2/SFN/PCNA/BTG2/RPL26/PML/PRMT1/TP53/CNOT7/BAX/AURKA/CNOT2/CDK1/CCNB1/ARID3A/TNKS1BP1/MDM4/CNOT11	20
BP	GO:0051881	regulation of mitochondrial membrane potential	23/2365	71/18862	1.02986e-05	0.000242741	0.000187424	IFI6/PARP1/BCL2/RACK1/SLC25A33/STOML2/ATP5IF1/BNIP3/BAK1/UCP2/VCP/NDUFS1/CLIC1/HEBP2/SOD1/AKT1/BAX/PYCR1/ARL6IP5/GCLM/RTL10/TUSC2/TSPO	23
BP	GO:2000027	regulation of animal organ morphogenesis	43/2365	176/18862	1.05409e-05	0.000247487	0.000191088	PSMB9/PSMB1/PSMB8/TACSTD2/PSMA4/PSMC4/PSMA7/CDC42/PSME2/PLEKHA4/PSME1/PSMD14/PSMA5/SIX1/SOX9/PSMB2/AP2S1/PSMA3/VEGFA/PSMD8/CTHRC1/PHB2/SP6/MESP1/PSMD1/PSMD7/EDN1/RSPO3/PSMD4/PSMA1/PSMD11/AP2M1/CELSR1/PSMC3/CLTC/PSMD6/SMURF1/PSMD2/FZD5/PSMD3/DVL1/RAC1/AP2A1	43
BP	GO:1901028	regulation of mitochondrial outer membrane permeabilization involved in apoptotic signaling pathway	17/2365	44/18862	1.0596e-05	0.000247815	0.000191342	TFDP2/SFN/BCL2/YWHAB/CHCHD10/ATP5IF1/YWHAQ/HSPA1A/BAK1/TP53/SLC25A5/YWHAZ/YWHAE/MAPK8/BAX/HIP1R/YWHAG	17
BP	GO:0072659	protein localization to plasma membrane	60/2365	275/18862	1.07317e-05	0.00025002	0.000193044	GBP1/S100A10/AGR2/TESC/OPTN/RACK1/KIF5B/CD81/RDX/RAB11A/LGALS3/ATP1B3/ITGA3/SQSTM1/CIB1/TSPAN15/PIK3R1/CDH1/RILPL2/LAMA5/GOLPH3L/AMN/RAB34/SLC9A3R2/TMBIM1/AP2M1/VAMP5/CRB3/RAMP1/SEC16A/PKP3/PICALM/TMED2/CLTC/AKT1/SPTBN1/SMURF1/EPHA2/GAK/ARHGEF16/MAP7/FLNA/SEC23A/GOLGA7/ARL6IP5/FLOT2/MMP14/EZR/TPBG/RAB13/F11R/KRT18/IFT20/ARF6/RER1/VTI1B/BSG/ATP1B1/GOLPH3/TNFRSF1A	60
BP	GO:0030330	DNA damage response, signal transduction by p53 class mediator	30/2365	106/18862	1.09588e-05	0.000254328	0.00019637	CD74/MUC1/SOX4/TFDP2/SFN/PCNA/BTG2/RPL26/ING4/PML/PRMT1/PTTG1IP/TP53/KDM1A/SP100/CNOT7/MYO6/BATF/BAX/AURKA/DDX5/CNOT2/CDK1/CCNB1/ARID3A/TNKS1BP1/MIF/NDRG1/MDM4/CNOT11	30
BP	GO:0031571	mitotic G1 DNA damage checkpoint	21/2365	62/18862	1.13902e-05	0.000262322	0.000202543	MUC1/SOX4/TFDP2/SFN/PCNA/BTG2/RPL26/PML/PRMT1/TP53/CNOT7/BAX/AURKA/CNOT2/CDK1/CCNB1/ARID3A/TNKS1BP1/MDM4/CNOT11/CCND1	21
BP	GO:1902686	mitochondrial outer membrane permeabilization involved in programmed cell death	21/2365	62/18862	1.13902e-05	0.000262322	0.000202543	TFDP2/SFN/BCL2/YWHAB/EYA2/CHCHD10/ATP5IF1/BNIP3/YWHAQ/HSPA1A/BAK1/TP53/SLC25A5/YWHAZ/YWHAE/MAPK8/BAX/RTL10/HIP1R/YWHAG/SPG7	21
BP	GO:0090151	establishment of protein localization to mitochondrial membrane	19/2365	53/18862	1.16664e-05	0.000267662	0.000206666	HSP90AA1/TFDP2/SFN/BCL2/YWHAB/PDCD5/HSPA4/YWHAQ/TP53/YWHAZ/CALM3/YWHAE/TIMM10/BCS1L/MAPK8/BAX/ROMO1/TIMM8B/YWHAG	19
BP	GO:0002833	positive regulation of response to biotic stimulus	57/2365	258/18862	1.19505e-05	0.000273142	0.000210897	IFI16/PSMB9/RPS19/HLA-DRB1/PSMB1/GBP5/MUC1/HSPD1/HSP90AA1/PSMB8/PSMA4/XRCC5/PARP9/PLSCR1/MUCL1/PSMC4/PSMA7/KLK5/PSME2/HMGB1/LSM14A/HLA-E/MUC4/PSME1/PSMD14/MUC16/PSMA5/HCK/PSMB2/CGAS/SFPQ/PSMA3/NMI/PSMD8/SKP1/PSMD1/LAMP1/PSMD7/PSMD4/PSMA1/PSMD11/DDX60/PSMC3/ADAM8/EREG/PSMD6/PSMD2/HLA-F/PVR/PSMD3/ICAM3/HMGB2/CYBA/NECTIN2/USP15/GRN/RIOK3	57
BP	GO:0062012	regulation of small molecule metabolic process	86/2365	437/18862	1.22146e-05	0.000278125	0.000214744	PSMB9/NUPR1/CD74/PSMB1/AKR1C3/IGFBP3/PARP1/PSMB8/CDA/PSMA4/RAN/COQ3/PSMC4/PSMA7/TMSB4X/IGFBP4/RAE1/CAV1/PSME2/HMGB1/CES1/TTC39B/IDI1/ENO1/INSIG1/PSME1/PSMD14/PSMA5/PROX1/FAM3C/SOX9/PSMB2/PSMA3/OAZ2/PSMD8/CEACAM1/SLC7A11/TP53/VCP/FDFT1/PSMD1/AK4/PSMD7/FDPS/PSMD4/PSMA1/PSMD11/NFYC/TPR/IRS1/PPP1CA/P2RY6/APOC1/PPP1CB/NUP62/PSMC3/SOD1/PDK1/RORC/DDIT4/AKT1/PSMD6/PRKAA1/PSMD2/HIF1A/OAZ1/MAEA/MIDN/SQLE/S…	86
BP	GO:0000028	ribosomal small subunit assembly	11/2365	21/18862	1.24041e-05	0.000280826	0.00021683	RPS19/RPS14/XRCC5/RPSA/RPS10/RPS5/RPL38/RPS28/RPS27/RRP7A/MRPS7	11
BP	GO:0045727	positive regulation of translation	35/2365	133/18862	1.24263e-05	0.000280826	0.00021683	RPL5/NPM1/EIF5A/SOX4/RPS9/CDK4/EIF3E/PAIP1/RPL26/KHDRBS1/YTHDF2/CDC123/LARP6/PLXNB2/ITGA2/CNBP/RMND1/EIF3D/FXR1/TRMT10C/POLR2G/YBX3/C1QBP/KRT17/PPP1R15A/ERBB2/METTL5/DHX36/NCK1/EEF2/MAPK3/DNAJC3/COA3/USP16/PYM1	35
BP	GO:0032922	circadian regulation of gene expression	22/2365	67/18862	1.25002e-05	0.000281442	0.000217305	HDAC2/ID2/CAVIN3/PPP1CC/ID1/HDAC1/PML/NAMPT/ID3/AHR/PPP1CA/PPP1CB/HNRNPU/HDAC3/RORC/MAGED1/PER1/BHLHE40/KDM2A/EGR1/CSNK1E/CSNK1D	22
BP	GO:0010952	positive regulation of peptidase activity	47/2365	200/18862	1.27127e-05	0.000285161	0.000220177	IFI16/F3/ASPH/LGALS9/HSPD1/TNFSF10/HSPE1/CASP8AP2/FAM162A/PDCD2/RACK1/NKX3-1/CAV1/PDCD5/PSME2/HMGB1/PSME1/PSMD14/FIS1/PML/BAK1/CTSD/DAPK1/S100A8/VCP/RCN3/MTCH1/PICALM/BAX/GSN/MYC/PRSS22/CLDN4/LGMN/ARL6IP5/ADRM1/APH1A/BCL2L13/TRADD/NCSTN/GRN/S100A9/PDCD6/HIP1R/EGLN3/BCAP31/PERP	47
BP	GO:0006611	protein export from nucleus	44/2365	183/18862	1.29148e-05	0.000288622	0.000222849	IFI27/NPM1/EIF5A/SSB/SFN/SRRM1/RAN/SRSF3/RAE1/ALKBH5/CDC40/MAGOH/CSE1L/RBM22/MAGOHB/SRSF7/HSPA9/DESI1/SLU7/TP53/SP100/BARD1/YWHAE/CHP1/TPR/SRSF2/NUP62/DDX39A/NCBP2/RBM8A/UPF2/SMURF1/SRSF4/HNRNPA2B1/SRSF11/NMD3/FYTTD1/AGFG1/AHCYL1/SIRT7/PTPN11/THOC6/SEC13/SLBP	44
BP	GO:1903747	regulation of establishment of protein localization to mitochondrion	23/2365	72/18862	1.33518e-05	0.000297288	0.000229541	DNAJA1/TFDP2/SFN/BCL2/SAE1/YWHAB/PDCD5/ATP5IF1/YWHAQ/TP53/UBE2L3/YWHAZ/YWHAE/MAPK8/PRKAA1/FZD5/NPEPPS/UBE2J2/TOMM7/UBL5/LMAN1/LEPROT/YWHAG	23
BP	GO:1903749	positive regulation of establishment of protein localization to mitochondrion	20/2365	58/18862	1.35242e-05	0.000300018	0.000231649	TFDP2/SFN/BCL2/SAE1/YWHAB/PDCD5/YWHAQ/TP53/UBE2L3/YWHAZ/YWHAE/MAPK8/PRKAA1/FZD5/NPEPPS/UBE2J2/TOMM7/UBL5/LEPROT/YWHAG	20
BP	GO:0045185	maintenance of protein location	27/2365	92/18862	1.44043e-05	0.000318373	0.000245821	SRGN/SRI/TMSB4X/YWHAB/CAV1/INSIG1/CHCHD10/NBL1/PML/SKP1/SP100/BARD1/TOPORS/ARL2BP/HNRNPU/DBN1/KDELR2/AKT1/GSN/KDELR3/FLNA/NFKBIA/TSPO/RER1/GPAA1/GOLPH3/HSPA5	27
BP	GO:2000116	regulation of cysteine-type endopeptidase activity	52/2365	230/18862	1.44729e-05	0.00031872	0.000246089	IFI6/IFI16/PSMB9/F3/ASPH/LGALS9/HSPD1/TNFSF10/HSPE1/CASP8AP2/LTF/SFN/SOX2/FAM162A/PDCD2/RACK1/NKX3-1/PDCD5/BIRC3/HMGB1/FIS1/PML/BAK1/CTSD/VEGFA/DAPK1/S100A8/VCP/YWHAE/CAAP1/MTCH1/CSNK2A1/AKT1/BAX/GSN/MYC/PRDX5/LGMN/ARL6IP5/NOL3/BCL2L13/XIAP/TRADD/MAGEA3/S100A9/PDCD6/HIP1R/EGLN3/BCAP31/DHCR24/PERP/PLAUR	52
BP	GO:0007052	mitotic spindle organization	32/2365	118/18862	1.48951e-05	0.000325796	0.000251553	STMN1/RAN/RAE1/LSM14A/VPS4B/RAB11A/NUDC/HSPA1A/DRG1/INTS13/SMC3/MISP/VCP/TTK/TPR/HNRNPU/NUP62/KIF2A/CLTC/MZT1/AURKA/FLNA/CCNB1/NUF2/CDC20/SBDS/TPX2/GOLGA2/CHMP1B/RMDN1/CHMP4C/PTPA	32
BP	GO:0071356	cellular response to tumor necrosis factor	63/2365	296/18862	1.49562e-05	0.000325796	0.000251553	GBP1/STAT1/PSMB9/GBP2/PSMB1/PSMB8/PSMA4/RACK1/PSMC4/NKX3-1/PSMA7/TMSB4X/PSME2/BIRC3/GBP3/PSME1/PSMD14/PSMA5/PSMB2/ARHGEF2/TNFRSF12A/HSPA1A/PSMA3/CIB1/PSMD8/GSTP1/TP53/PSMD1/PSMD7/EDN1/PSMD4/HYAL1/YBX3/PSMA1/PSMD11/ZFP36/GBA/PSMC3/CLDN1/NFE2L2/AKAP12/FOXO3/AKT1/PSMD6/CCL20/PSMD2/KRT8/PSMD3/NOL3/MAPK3/CASP4/TRADD/TNFRSF21/COL1A1/HYAL2/ICAM1/ZFP36L2/NFKBIA/KRT18/SPPL2A/RBCK1/TRAF4/TNFRSF1A	63
BP	GO:0140014	mitotic nuclear division	63/2365	296/18862	1.49562e-05	0.000325796	0.000251553	MAD2L2/SMC2/RPL24/RAN/IK/CAV2/CDC42/LSM14A/VPS4B/DUSP1/RAB11A/PPP2R1A/NUDC/HSPA1A/NAA10/BUB3/NAA50/SMC4/BOD1/PHIP/DRG1/SMC3/MISP/FBXW5/PHB2/FBXO5/LPIN1/EDN1/TTK/PTTG1/TPR/HNRNPU/NUP62/ANAPC11/UBE2S/PPP2CA/KIF2A/EREG/MZT1/AURKA/AURKAIP1/CENPF/NIPBL/FLNA/KIF2C/RAD21/CDK1/CCNB1/NUF2/RANBP1/TGFA/CDC20/TPX2/GOLGA2/NUSAP1/CHMP1B/RMDN1/CDC26/SIRT7/CHMP4C/LMNA/USP16/SMC5	63
BP	GO:0044819	mitotic G1/S transition checkpoint	21/2365	63/18862	1.50815e-05	0.000327345	0.000252748	MUC1/SOX4/TFDP2/SFN/PCNA/BTG2/RPL26/PML/PRMT1/TP53/CNOT7/BAX/AURKA/CNOT2/CDK1/CCNB1/ARID3A/TNKS1BP1/MDM4/CNOT11/CCND1	21
BP	GO:0032469	endoplasmic reticulum calcium ion homeostasis	12/2365	25/18862	1.57242e-05	0.000338856	0.000261636	BCL2/FIS1/PML/BAK1/BAX/ATP2A2/TGM2/TMCO1/TMBIM6/PSEN1/SELENOK/BCAP31	12
BP	GO:0033119	negative regulation of RNA splicing	12/2365	25/18862	1.57242e-05	0.000338856	0.000261636	RPS26/RPS13/SRSF10/RBMX/SRSF7/HNRNPK/C1QBP/RBM42/SRSF4/HNRNPA2B1/TMBIM6/SAP18	12
BP	GO:0010821	regulation of mitochondrion organization	38/2365	151/18862	1.64382e-05	0.000352982	0.000272543	TNFSF10/TFDP2/SFN/BCL2/FAM162A/YWHAB/PDCD5/CHCHD10/ATP5IF1/BNIP3/YWHAQ/FIS1/HSPA1A/BAK1/SQSTM1/VDAC1/FXN/TP53/SLC25A5/YWHAZ/YWHAE/MAPK8/AKT1/BAX/CLU/HIF1A/FZD5/INF2/NOL3/CTTN/BIK/TSPO/HIP1R/YWHAG/SIRT7/VAT1/GOLPH3/PLAUR	38
BP	GO:0046822	regulation of nucleocytoplasmic transport	29/2365	103/18862	1.701e-05	0.000363966	0.000281024	IFI27/HSP90AB1/SFN/RAN/ANGPT1/PPP1CC/APOD/KHDRBS1/RBM22/PKIG/PIK3R1/TP53/SP100/BARD1/CDH1/YWHAE/PPP1R12A/CHP1/TPR/CPSF6/NUP62/HDAC3/NCBP2/FLNA/NOLC1/HYAL2/PSEN1/SIRT7/PTPN11	29
BP	GO:0033044	regulation of chromosome organization	59/2365	273/18862	1.70979e-05	0.000364168	0.00028118	MUC1/TCP1/PARP1/MAD2L2/XRCC5/CCT2/CCT4/HNRNPA1/MYB/CCT3/IK/SMARCB1/CCT7/DUSP1/CCT5/ERCC1/UBE2N/NAA10/PML/SFPQ/PKIB/BUB3/VEGFA/MCPH1/DKC1/RUVBL2/TP53/KDM1A/FBXO5/HNRNPC/CTBP1/TTK/MCM2/PTTG1/TPR/CCT8/HNRNPU/NSD3/ANAPC11/SDR16C5/MYC/FEN1/CENPF/HNRNPA2B1/DNMT1/NIPBL/DHX36/RIF1/RAD21/CCNB1/NABP2/MAPK3/RNF20/CDC20/ZBTB7B/CDC26/TOP2A/CTNNB1/SMC5	59
BP	GO:0072401	signal transduction involved in DNA integrity checkpoint	23/2365	73/18862	1.72005e-05	0.000364168	0.00028118	MUC1/SOX4/TFDP2/SFN/PCNA/BTG2/RPL26/CDC5L/PML/PRMT1/TP53/CNOT7/BABAM2/PRPF19/BAX/AURKA/CNOT2/CDK1/CCNB1/ARID3A/TNKS1BP1/MDM4/CNOT11	23
BP	GO:0072422	signal transduction involved in DNA damage checkpoint	23/2365	73/18862	1.72005e-05	0.000364168	0.00028118	MUC1/SOX4/TFDP2/SFN/PCNA/BTG2/RPL26/CDC5L/PML/PRMT1/TP53/CNOT7/BABAM2/PRPF19/BAX/AURKA/CNOT2/CDK1/CCNB1/ARID3A/TNKS1BP1/MDM4/CNOT11	23
BP	GO:0042493	response to drug	73/2365	359/18862	1.74262e-05	0.000367657	0.000283874	S100A10/HSP90AB1/CXCR4/HDAC2/B2M/XRCC5/OXCT1/NNMT/CDK4/ABCC3/BCL2/PTN/NKX3-1/LPL/IGFBP2/CA9/PLIN2/ADA/APOD/RBM22/PTGR1/JUN/ITGA3/BAK1/ITGA2/CTPS1/SORD/SCGB1A1/AGPAT2/TP53/LGALS1/MCM7/TIMP2/CDH1/APEX1/TXN2/UQCRC2/UMPS/AK4/PPP1R12A/EDN1/RNF149/NME1/ATG5/GGH/SOD1/NFE2L2/PAM/TYMS/PRKAA1/MYC/DUSP6/TGFBR2/CENPF/TP53I13/TGIF1/CRKL/ARL6IP5/ANXA1/GCLM/CCNB1/EEF2/TXNIP/COL1A1/FOSB/ICAM1/MGST1/DAD1/TSPO/NQO…	73
BP	GO:1902402	signal transduction involved in mitotic DNA damage checkpoint	20/2365	59/18862	1.80653e-05	0.000377642	0.000291584	MUC1/SOX4/TFDP2/SFN/PCNA/BTG2/RPL26/PML/PRMT1/TP53/CNOT7/BAX/AURKA/CNOT2/CDK1/CCNB1/ARID3A/TNKS1BP1/MDM4/CNOT11	20
BP	GO:1902403	signal transduction involved in mitotic DNA integrity checkpoint	20/2365	59/18862	1.80653e-05	0.000377642	0.000291584	MUC1/SOX4/TFDP2/SFN/PCNA/BTG2/RPL26/PML/PRMT1/TP53/CNOT7/BAX/AURKA/CNOT2/CDK1/CCNB1/ARID3A/TNKS1BP1/MDM4/CNOT11	20
BP	GO:1903312	negative regulation of mRNA metabolic process	26/2365	88/18862	1.80873e-05	0.000377642	0.000291584	YBX1/PAIP1/SRSF10/RBMX/HNRNPA0/SYNCRIP/SRSF7/BARD1/HNRNPC/THRAP3/HNRNPK/YBX3/C1QBP/ZFP36/RBM42/HNRNPU/PKP3/SLC11A1/SRSF4/HNRNPA2B1/MAPKAPK2/RNF20/TAF15/TOB1/SAP18/SECISBP2	26
BP	GO:0031581	hemidesmosome assembly	8/2365	12/18862	1.87033e-05	0.000383862	0.000296386	CD151/LAMC2/LAMB3/PLEC/ITGB4/LAMA3/LAMC1/DST	8
BP	GO:0070202	regulation of establishment of protein localization to chromosome	8/2365	12/18862	1.87033e-05	0.000383862	0.000296386	TCP1/CCT2/CCT4/CCT3/CCT7/CCT5/DKC1/CCT8	8
BP	GO:1903405	protein localization to nuclear body	8/2365	12/18862	1.87033e-05	0.000383862	0.000296386	TCP1/CCT2/CCT4/CCT3/CCT7/CCT5/DKC1/CCT8	8
BP	GO:1904816	positive regulation of protein localization to chromosome, telomeric region	8/2365	12/18862	1.87033e-05	0.000383862	0.000296386	TCP1/CCT2/CCT4/CCT3/CCT7/CCT5/DKC1/CCT8	8
BP	GO:1904867	protein localization to Cajal body	8/2365	12/18862	1.87033e-05	0.000383862	0.000296386	TCP1/CCT2/CCT4/CCT3/CCT7/CCT5/DKC1/CCT8	8
BP	GO:0034250	positive regulation of cellular amide metabolic process	40/2365	163/18862	1.88852e-05	0.000386088	0.000298105	RPL5/NPM1/EIF5A/SOX4/RPS9/CDK4/EIF3E/PAIP1/RACK1/RPL26/KHDRBS1/YTHDF2/CDC123/LARP6/PLXNB2/ITGA2/CNBP/RMND1/EIF3D/FXR1/TRMT10C/POLR2G/YBX3/C1QBP/KRT17/PPP1R15A/NFE2L2/PICALM/ERBB2/CLU/METTL5/DHX36/NCK1/EEF2/MAPK3/DNAJC3/COA3/USP16/PYM1/TNFRSF1A	40
BP	GO:0001701	in utero embryonic development	69/2365	335/18862	1.89397e-05	0.000386088	0.000298105	C6orf141/ASCL2/TBX3/BTF3/ANGPT1/FURIN/NASP/ADA/ST14/MSH2/EPAS1/ELF3/TGFBR1/SPINT1/HOPX/HEY1/VEGFA/SPINT2/PRMT1/TTLL4/TP53/PTPN18/ACTL6A/SLC39A1/SYF2/GJB3/SMIM14/CIR1/EDN1/RSPO3/YBX3/YAP1/COPS3/TANC2/RPL7L1/SEC24D/DBN1/ZFAND5/PRPF19/BYSL/NDUFA2/TMED2/AKT1/SLC34A2/HIF1A/TGFBR2/CEBPB/MAFG/FZD5/KRT8/MYO1E/CNOT2/HES1/ADM/CCNB1/MGAT1/PLOD3/PHLDA2/EIF2S2/SBDS/CMIP/JUNB/UBE2A/DAD1/KRT19/CAPN2/RRP7A/HM13/…	69
BP	GO:1905710	positive regulation of membrane permeability	22/2365	69/18862	2.11304e-05	0.000429296	0.000331466	TFDP2/SFN/BCL2/YWHAB/EYA2/CHCHD10/ATP5IF1/BNIP3/YWHAQ/HSPA1A/BAK1/TP53/SLC25A5/YWHAZ/YWHAE/MAPK8/HEBP2/BAX/RTL10/HIP1R/YWHAG/SPG7	22
BP	GO:0048863	stem cell differentiation	55/2365	251/18862	2.15723e-05	0.000436803	0.000337262	PSMB9/PSMB1/PSMB8/TACSTD2/PSMA4/XRCC5/EIF2AK2/SEMA3B/MYB/PTN/PSMC4/ANXA6/PSMA7/PSME2/PSME1/PSMD14/PSMA5/YTHDF2/PWP1/SOX9/PSMB2/HSPA9/PSMA3/PSMD8/TP53/PSMD1/LAMA5/PSMD7/TEAD2/EDN1/PSMD4/UFL1/PSMA1/PSMD11/PEF1/YAP1/HNRNPU/PSMC3/BATF/NFE2L2/PSMD6/METTL5/PSMD2/HIF1A/DHX36/NOLC1/HES1/PSMD3/MAPK3/SEMA4B/ZFP36L2/LTBP3/PDCD6/KRT18/RUNX1	55
BP	GO:2001252	positive regulation of chromosome organization	40/2365	164/18862	2.19965e-05	0.000443903	0.000342745	MUC1/TCP1/XRCC5/CCT2/CCT4/HNRNPA1/MYB/CCT3/SMARCB1/CCT7/CCT5/ERCC1/UBE2N/PML/SFPQ/PKIB/VEGFA/DKC1/RUVBL2/TP53/KDM1A/CTBP1/TPR/CCT8/NSD3/SDR16C5/FEN1/HNRNPA2B1/DNMT1/NIPBL/DHX36/RIF1/RAD21/CCNB1/NABP2/MAPK3/RNF20/ZBTB7B/CTNNB1/SMC5	40
BP	GO:0042770	signal transduction in response to DNA damage	34/2365	131/18862	2.25187e-05	0.000452926	0.000349712	CD74/MUC1/SOX4/MAD2L2/TFDP2/SFN/PCNA/BTG2/RPL26/CDC5L/ING4/PML/PRMT1/PTTG1IP/TP53/KDM1A/SP100/CNOT7/MYO6/BATF/BABAM2/PRPF19/BAX/AURKA/DDX5/CNOT2/CDK1/CCNB1/ARID3A/TNKS1BP1/MIF/NDRG1/MDM4/CNOT11	34
BP	GO:0072595	maintenance of protein localization in organelle	16/2365	42/18862	2.36464e-05	0.000472474	0.000364805	INSIG1/CHCHD10/PML/SKP1/SP100/BARD1/TOPORS/ARL2BP/HNRNPU/KDELR2/AKT1/KDELR3/TSPO/RER1/GPAA1/HSPA5	16
BP	GO:0006520	cellular amino acid metabolic process	68/2365	331/18862	2.3665e-05	0.000472474	0.000364805	PHGDH/KYNU/PSMB9/PSMB1/IDO1/PSMB8/SHMT1/PSMA4/APIP/GMPS/MTAP/GLUL/PSMC4/PSMA7/PEPD/ALDH7A1/PSME2/ACADSB/PSME1/PSMD14/PSMA5/RARS2/GCLC/AHCY/PSMB2/ASRGL1/FARSB/PSMA3/OAZ2/PSMD8/CTPS1/SEPHS1/SLC7A11/GCAT/SHMT2/PSMD1/HGD/PYCR2/PSMD7/HIBCH/SMS/NIT2/PSMD4/PSMA1/PSMD11/MTHFD1/BHMT2/PPA1/PSMC3/ILVBL/PSMD6/PSMD2/OAZ1/PYCR1/DDAH2/SDSL/ASPG/SEPHS2/PSMD3/GCLM/PLOD3/HIBADH/HSD17B10/HNMT/SLC39A8/PCBD1/NQO1/PLO…	68
BP	GO:1901654	response to ketone	45/2365	193/18862	2.37255e-05	0.000472474	0.000364805	SPP1/ERRFI1/AKR1C2/AKR1C3/PARP1/CDK4/MTAP/PTN/NKX3-1/PCNA/CA9/CAV1/NASP/CDC5L/DUSP1/ADAM15/CALM3/KLF9/EDN1/ABHD2/SMYD3/AHR/GBA/YAP1/NME1/CLDN1/DDIT4/AKT1/DSG2/TYMS/PRKAA1/NCOA4/CLDN4/ATP2B1/TXNIP/FDX1/FOSB/ICAM1/NR3C1/TSPO/GLB1/MSN/NQO1/GOLPH3/CCND1	45
BP	GO:0071806	protein transmembrane transport	20/2365	60/18862	2.3928e-05	0.000473383	0.000365506	AZGP1/HSPD1/PEX26/TRAM1/TOMM20/SEC61B/HSPA8/SEC61G/SEC63/TIMM17A/DNAJC15/TMED10/TIMM17B/TIMM50/CLU/ROMO1/TOMM7/SEC62/SEC61A1/HSPA5	20
BP	GO:1902110	positive regulation of mitochondrial membrane permeability involved in apoptotic process	20/2365	60/18862	2.3928e-05	0.000473383	0.000365506	TFDP2/SFN/BCL2/YWHAB/EYA2/CHCHD10/ATP5IF1/BNIP3/YWHAQ/HSPA1A/BAK1/TP53/SLC25A5/YWHAZ/YWHAE/MAPK8/BAX/RTL10/HIP1R/YWHAG	20
BP	GO:0097191	extrinsic apoptotic signaling pathway	49/2365	217/18862	2.60922e-05	0.000514512	0.000397263	IFI6/IFI27/FGB/FGG/FGA/TNFSF10/CASP8AP2/BCL2/CAV1/EYA2/TGFBR1/LGALS3/ARHGEF2/TNFRSF12A/HSPA1A/PRDX2/PML/BAK1/SIVA1/CIB1/PHIP/GSTP1/PIK3R1/SP100/MKNK2/FGFR3/TMC8/EYA3/ITGAV/ATF3/TMBIM1/PPP1CA/YAP1/G0S2/AKT1/BAX/KRT8/GCLM/NOL3/PPP2R1B/HMGB2/TRADD/CTTN/HYAL2/ICAM1/ERBB3/KRT18/RBCK1/TNFRSF1A	49
BP	GO:0045089	positive regulation of innate immune response	50/2365	223/18862	2.64779e-05	0.000520415	0.000401821	IFI16/PSMB9/RPS19/PSMB1/GBP5/MUC1/HSP90AA1/PSMB8/PSMA4/XRCC5/PARP9/PLSCR1/MUCL1/PSMC4/PSMA7/PSME2/HMGB1/LSM14A/HLA-E/MUC4/PSME1/PSMD14/MUC16/PSMA5/HCK/PSMB2/CGAS/SFPQ/PSMA3/NMI/PSMD8/SKP1/PSMD1/LAMP1/PSMD7/PSMD4/PSMA1/PSMD11/PSMC3/ADAM8/EREG/PSMD6/PSMD2/HLA-F/PVR/PSMD3/ICAM3/HMGB2/NECTIN2/RIOK3	50
BP	GO:0034612	response to tumor necrosis factor	66/2365	320/18862	2.7221e-05	0.000533285	0.000411758	GBP1/STAT1/PSMB9/GBP2/PSMB1/PSMB8/PSMA4/RACK1/PSMC4/NKX3-1/PSMA7/TMSB4X/PSME2/BIRC3/GBP3/ADAM9/PSME1/PSMD14/PSMA5/PSMB2/ARHGEF2/TNFRSF12A/HSPA1A/PSMA3/CIB1/PSMD8/GSTP1/TP53/PSMD1/PSMD7/EDN1/PSMD4/HYAL1/YBX3/PSMA1/PSMD11/ZFP36/GBA/NUB1/PSMC3/CLDN1/NFE2L2/AKAP12/FOXO3/AKT1/PSMD6/CCL20/PSMD2/KRT8/PSMD3/NOL3/MAPK3/CASP4/TRADD/TNFRSF21/CXCL16/COL1A1/HYAL2/ICAM1/ZFP36L2/NFKBIA/KRT18/SPPL2A/RBCK1/TRAF4/…	66
BP	GO:0018279	protein N-linked glycosylation via asparagine	13/2365	30/18862	2.74762e-05	0.000536541	0.000414272	DPM1/OST4/OSTC/DPM2/UBE2J1/MGAT2/MGAT1/STT3A/LMAN1/DPM3/DAD1/MAGT1/RPN1	13
BP	GO:1900182	positive regulation of protein localization to nucleus	25/2365	85/18862	2.83418e-05	0.00055166	0.000425946	HSP90AB1/TCP1/PARP1/PARP9/CCT2/CCT4/CCT3/RAN/CCT7/RBM22/CCT5/DKC1/PIK3R1/CDH1/TPR/YAP1/CCT8/HDAC3/AKT1/FLNA/NMD3/CDK1/HYAL2/PSEN1/CD2AP	25
BP	GO:0007623	circadian rhythm	48/2365	212/18862	2.91613e-05	0.000565786	0.000436852	HDAC2/NDUFA9/CDK4/ID2/CAVIN3/PPP1CC/PTGDS/ADA/OPN3/PROX1/JUN/ID1/AHCY/HDAC1/PML/SFPQ/NAMPT/HNRNPR/TP53/NR2F6/THRAP3/KLF9/MAPK8/ID3/AHR/EZH2/PPP1CA/PPP1CB/HNRNPU/SUV39H2/HDAC3/RORC/MAGED1/TYMS/PRKAA1/PER1/CLDN4/HEBP1/BHLHE40/JUND/KDM2A/CDK1/EGR1/CSNK1E/GNAQ/CSNK1D/TOP2A/NMU	48
BP	GO:0070059	intrinsic apoptotic signaling pathway in response to endoplasmic reticulum stress	20/2365	61/18862	3.14376e-05	0.000606052	0.000467943	ERO1A/RNF183/BCL2/HSPA1A/ERP29/PML/BAK1/TP53/DDIT3/PPP1R15A/BAX/CEBPB/SELENOS/NCK1/TMBIM6/CASP4/MAGEA3/SELENOK/XBP1/TXNDC12	20
BP	GO:0072413	signal transduction involved in mitotic cell cycle checkpoint	20/2365	61/18862	3.14376e-05	0.000606052	0.000467943	MUC1/SOX4/TFDP2/SFN/PCNA/BTG2/RPL26/PML/PRMT1/TP53/CNOT7/BAX/AURKA/CNOT2/CDK1/CCNB1/ARID3A/TNKS1BP1/MDM4/CNOT11	20
BP	GO:1902108	regulation of mitochondrial membrane permeability involved in apoptotic process	21/2365	66/18862	3.34627e-05	0.000641126	0.000495024	TFDP2/SFN/BCL2/YWHAB/EYA2/CHCHD10/ATP5IF1/BNIP3/YWHAQ/HSPA1A/BAK1/TP53/SLC25A5/YWHAZ/YWHAE/MAPK8/BAX/NOL3/RTL10/HIP1R/YWHAG	21
BP	GO:0032091	negative regulation of protein binding	27/2365	96/18862	3.34695e-05	0.000641126	0.000495024	B2M/RACK1/NKX3-1/CAV1/IFIT1/ID1/SLPI/IFIT2/RUVBL2/ADAM15/KDM1A/DTNBP1/LRPAP1/MAPK8/TMC8/PPP1CA/MAP2/AKT1/BAX/AURKA/ATP2A2/DVL1/MAPK3/CSNK1E/TMBIM6/GOLGA2/PTPRF	27
BP	GO:1903321	negative regulation of protein modification by small protein conjugation or removal	26/2365	91/18862	3.45134e-05	0.000659031	0.000508848	RPL5/DNAJA1/ISG15/RPL11/SOX4/MAD2L2/IVNS1ABP/PLAA/CAV1/SVBP/RPS7/GTPBP4/HSPA1A/VPS28/SQSTM1/FBXO5/CHP1/UFL1/ATG5/AKT1/UBXN1/PSEN1/PPIA/TSPO/SIRT7/CTNNB1	26
BP	GO:0072395	signal transduction involved in cell cycle checkpoint	23/2365	76/18862	3.54705e-05	0.000675048	0.000521215	MUC1/SOX4/TFDP2/SFN/PCNA/BTG2/RPL26/CDC5L/PML/PRMT1/TP53/CNOT7/BABAM2/PRPF19/BAX/AURKA/CNOT2/CDK1/CCNB1/ARID3A/TNKS1BP1/MDM4/CNOT11	23
BP	GO:0043393	regulation of protein binding	45/2365	196/18862	3.55759e-05	0.000675048	0.000521215	HSP90AB1/RPL11/B2M/RAN/RACK1/NKX3-1/ANGPT1/CAV1/CDC42/IFIT1/TGFBR1/ID1/SLPI/CTHRC1/IFIT2/RUVBL2/ADAM15/KDM1A/DTNBP1/ANXA2/LRPAP1/MAPK8/TMC8/NVL/PPP1CA/RAMP1/MAP2/PPP2CA/AKT1/BAX/PPP2CB/AMFR/AURKA/ATP2A2/NMD3/DVL1/MAPK3/CSNK1E/PHLDA2/TMBIM6/GOLGA2/PSEN1/HIP1R/PCBD1/PTPRF	45
BP	GO:0035821	modulation of process of other organism	32/2365	123/18862	3.67895e-05	0.000695887	0.000537306	IFI27/LTF/EIF2AK2/CAV2/SMARCB1/STOM/NUCKS1/POU2F3/RRAGA/JUN/SLPI/HDAC1/TAF11/PHB2/KPNA3/ANXA2/HSPA8/TNIP1/KRT6A/VAPB/SMARCA4/HPN/ATG5/PSMC3/DAG1/RXRA/TYMS/SUGT1/HYAL2/S100A9/RAB9A/PPIB	32
BP	GO:1903008	organelle disassembly	29/2365	107/18862	3.71747e-05	0.000700483	0.000540854	OPTN/KIF5B/RETREG1/ATP5IF1/BNIP3/FIS1/SQSTM1/VDAC1/PHB2/TP53/VCP/UFL1/GBA/ATG5/UBA5/HIF1A/UFC1/FZD5/FUNDC2/CDK1/TOMM7/ATG12/DENR/TEX264/CTTN/MTIF3/GOLGA2/TSPO/MAP1LC3B	29
BP	GO:0008584	male gonad development	34/2365	134/18862	3.73545e-05	0.000700483	0.000540854	NUPR1/TESC/AKR1C3/TNFSF10/BCL2/NKX3-1/NASP/SDC1/CSDE1/MSH2/TGFBR1/SOX9/ERCC1/COL9A3/FSTL3/HSD17B4/TFAP2C/RRM1/ADAM15/YBX3/BAX/PLEKHA1/FLNA/NCOA4/CRKL/EIF2S2/HMGB2/MMP14/PRDX4/RAB13/ICAM1/BIK/MGST1/CCND1	34
BP	GO:0009219	pyrimidine deoxyribonucleotide metabolic process	11/2365	23/18862	3.73808e-05	0.000700483	0.000540854	TDG/UPP1/TBPL1/UNG/MBD4/TYMS/TYMP/DCTPP1/NTHL1/NT5C/SMUG1	11
BP	GO:0048545	response to steroid hormone	67/2365	330/18862	3.98487e-05	0.000742342	0.000573174	SPP1/DNAJA1/ERRFI1/AKR1C3/PARP1/TFPI/BCL2/PTN/NKX3-1/IGFBP2/PCNA/CAV1/HMGB1/SCGB2A1/ADAM9/SDC1/DUSP1/HEY1/HDAC1/GSTP1/SCGB1A1/PHB2/UBE2L3/CALM3/KLF9/EDN1/ABHD2/SMYD3/UFL1/ZFP36/GBA/YAP1/SMARCA4/HNRNPU/UBA5/CA2/TAF7/CLDN1/DDIT4/PAM/RXRA/DSG2/TYMS/TGFBR2/DDX5/NCOA4/PER1/CLDN4/CNOT2/ANXA1/ADM/ATP2B1/HMGB2/TXNIP/HNMT/NCOR2/PGRMC2/COL1A1/ANXA3/FOSB/ICAM1/ZFP36L2/NR3C1/RUNX1/TSPO/GLB1/CCND1	67
BP	GO:0051204	protein insertion into mitochondrial membrane	17/2365	48/18862	3.99836e-05	0.000742342	0.000573174	HSP90AA1/TFDP2/SFN/BCL2/YWHAB/PDCD5/HSPA4/YWHAQ/TP53/YWHAZ/YWHAE/TIMM10/MAPK8/BAX/ROMO1/TIMM8B/YWHAG	17
BP	GO:0052372	modulation by symbiont of entry into host	17/2365	48/18862	3.99836e-05	0.000742342	0.000573174	CD74/HLA-DRB1/LGALS9/TRIM22/IFITM3/LY6E/SNX3/CAV1/P4HB/LGALS1/TMPRSS4/ITGAV/TRIM38/KRT6A/IFITM2/GSN/NECTIN2	17
BP	GO:0032200	telomere organization	41/2365	174/18862	4.13633e-05	0.000760933	0.000587529	HSP90AB1/HSP90AA1/TCP1/PARP1/XRCC5/CCT2/CCT4/HNRNPA1/CCT3/PCNA/CCT7/CCT5/ERCC1/PTGES3/PML/PKIB/PRIM1/DKC1/DCLRE1C/SP100/APEX1/HNRNPC/POLE4/TPRKB/POLD4/POLE3/CCT8/HNRNPU/RFC4/RFC1/MYC/FEN1/HNRNPA2B1/RFC3/DHX36/RIF1/NABP2/MAPK3/TNKS1BP1/NOP10/SMC5	41
BP	GO:0033209	tumor necrosis factor-mediated signaling pathway	41/2365	174/18862	4.13633e-05	0.000760933	0.000587529	STAT1/PSMB9/PSMB1/PSMB8/PSMA4/RACK1/PSMC4/PSMA7/TMSB4X/PSME2/BIRC3/PSME1/PSMD14/PSMA5/PSMB2/TNFRSF12A/HSPA1A/PSMA3/PSMD8/GSTP1/TP53/PSMD1/PSMD7/PSMD4/PSMA1/PSMD11/PSMC3/FOXO3/PSMD6/PSMD2/KRT8/PSMD3/NOL3/CASP4/TRADD/NFKBIA/KRT18/SPPL2A/RBCK1/TRAF4/TNFRSF1A	41
BP	GO:2000045	regulation of G1/S transition of mitotic cell cycle	41/2365	174/18862	4.13633e-05	0.000760933	0.000587529	CDKN2A/MUC1/SOX4/TFDP2/CDK4/SFN/BCL2/ID2/PCNA/CDKN2B/BTG2/PSME2/RPL26/PSME1/RDX/PML/ZNF655/PRMT1/TP53/PLCB1/CNOT7/APEX1/HYAL1/EZH2/PLRG1/AKT1/BAX/AURKA/CDK2AP2/CNOT2/CDC73/ANXA1/CDK1/CCNB1/JADE1/ARID3A/TNKS1BP1/MDM4/CNOT11/CCND1/CCND3	41
BP	GO:0018196	peptidyl-asparagine modification	13/2365	31/18862	4.19037e-05	0.000768531	0.000593395	DPM1/OST4/OSTC/DPM2/UBE2J1/MGAT2/MGAT1/STT3A/LMAN1/DPM3/DAD1/MAGT1/RPN1	13
BP	GO:0046546	development of primary male sexual characteristics	34/2365	135/18862	4.3997e-05	0.000802048	0.000619274	NUPR1/TESC/AKR1C3/TNFSF10/BCL2/NKX3-1/NASP/SDC1/CSDE1/MSH2/TGFBR1/SOX9/ERCC1/COL9A3/FSTL3/HSD17B4/TFAP2C/RRM1/ADAM15/YBX3/BAX/PLEKHA1/FLNA/NCOA4/CRKL/EIF2S2/HMGB2/MMP14/PRDX4/RAB13/ICAM1/BIK/MGST1/CCND1	34
BP	GO:0051384	response to glucocorticoid	34/2365	135/18862	4.3997e-05	0.000802048	0.000619274	ERRFI1/BCL2/IGFBP2/PCNA/HMGB1/ADAM9/SDC1/DUSP1/HEY1/GSTP1/SCGB1A1/UBE2L3/CALM3/KLF9/EDN1/SMYD3/ZFP36/GBA/HNRNPU/CLDN1/DDIT4/PAM/TYMS/ANXA1/ADM/ATP2B1/HNMT/ANXA3/FOSB/ICAM1/ZFP36L2/NR3C1/GLB1/CCND1	34
BP	GO:0006984	ER-nucleus signaling pathway	18/2365	53/18862	4.55705e-05	0.000828231	0.00063949	AGR2/ABCA7/INSIG1/EIF2A/TP53/DDIT3/ATF3/PPP1R15A/NFE2L2/TMED2/AMFR/ATP2A2/SELENOS/NCK1/TMCO1/ZBTB7B/XBP1/HSPA5	18
BP	GO:0031960	response to corticosteroid	37/2365	152/18862	4.59649e-05	0.00083289	0.000643088	ERRFI1/AKR1C3/PARP1/BCL2/IGFBP2/PCNA/HMGB1/ADAM9/SDC1/DUSP1/HEY1/GSTP1/SCGB1A1/UBE2L3/CALM3/KLF9/EDN1/SMYD3/ZFP36/GBA/HNRNPU/CLDN1/DDIT4/PAM/TYMS/ANXA1/ADM/ATP2B1/HNMT/COL1A1/ANXA3/FOSB/ICAM1/ZFP36L2/NR3C1/GLB1/CCND1	37
BP	GO:0051054	positive regulation of DNA metabolic process	45/2365	198/18862	4.62588e-05	0.000833444	0.000643516	HSP90AB1/HSP90AA1/TCP1/PARP1/MAD2L2/XRCC5/PARP9/CCT2/CCT4/HNRNPA1/CCT3/PCNA/HMGB1/EXOSC3/CCT7/EYA2/MSH2/CCT5/ERCC1/UBE2N/PTGES3/PML/PKIB/CEBPG/DKC1/RAD51AP1/EYA3/RNF168/NVL/HMCES/CCT8/RFC4/BABAM2/CLCF1/AKT1/BAX/MYC/HNRNPA2B1/RFC3/DHX36/RIF1/NABP2/MAPK3/NSD2/ANXA3	45
BP	GO:1903573	negative regulation of response to endoplasmic reticulum stress	16/2365	44/18862	4.62718e-05	0.000833444	0.000643516	RACK1/ABCA7/HSPA1A/UFL1/PPP1R15A/TMED2/CLU/SELENOS/UBXN1/NCK1/TMBIM6/MAGEA3/DNAJC3/XBP1/TXNDC12/HSPA5	16
BP	GO:0031146	SCF-dependent proteasomal ubiquitin-dependent protein catabolic process	26/2365	93/18862	5.19573e-05	0.000933066	0.000720435	PSMB9/PSMB1/PSMB8/PSMA4/PSMC4/PSMA7/PSME2/PSME1/PSMD14/PSMA5/PSMB2/FBXO2/CUL2/PSMA3/PSMD8/SKP1/FBXW5/PSMD1/PSMD7/PSMD4/PSMA1/PSMD11/PSMC3/PSMD6/PSMD2/PSMD3	26
BP	GO:0009262	deoxyribonucleotide metabolic process	15/2365	40/18862	5.25654e-05	0.000941186	0.000726705	SAMHD1/TDG/ADA/UPP1/RRM1/TBPL1/UNG/MBD4/TYMS/TYMP/DCTPP1/NTHL1/RRM2/NT5C/SMUG1	15
BP	GO:0009141	nucleoside triphosphate metabolic process	29/2365	109/18862	5.38294e-05	0.000958131	0.000739788	ATP5F1C/PARP1/RAN/TMSB4X/SAMHD1/ENO1/ATP5F1B/ADA/ATP5ME/AK3/ATP5PB/STOML2/ATP5MC3/CTPS1/ITPA/ATP5F1A/TBPL1/VCP/GNAI3/SMPDL3A/AK4/NME7/NME1/ALDOA/TYMS/DCTPP1/ATP6V1A/NME3/ATP5MG	29
BP	GO:0098781	ncRNA transcription	29/2365	109/18862	5.38294e-05	0.000958131	0.000739788	SNAPC3/NOP53/NIFK/SMARCB1/PWP1/ZC3H8/POLR2L/POLR1E/INTS13/NCL/TAF11/TP53/INTS11/POLR2I/GTF3C5/INTS10/GTF2B/POLR2G/PHAX/ELL2/SMARCA4/ANG/NCBP2/GTF3C6/NABP2/TAF6/SIRT7/POLR2J/GTF2A2	29
BP	GO:0090114	COPII-coated vesicle budding	22/2365	73/18862	5.5871e-05	0.000991546	0.000765589	AREG/SERPINA1/INSIG1/VAPB/PEF1/TMED10/SEC24D/SEC16A/TMED2/SEC31A/SEC23A/TGFA/CD59/GOLGA2/TRAPPC4/BET1/LMAN1/PDCD6/CSNK1D/USO1/RAB1B/SEC13	22
BP	GO:0010950	positive regulation of endopeptidase activity	42/2365	182/18862	5.62418e-05	0.000995199	0.000768409	IFI16/F3/ASPH/LGALS9/HSPD1/TNFSF10/HSPE1/CASP8AP2/FAM162A/PDCD2/RACK1/NKX3-1/PDCD5/PSME2/HMGB1/PSME1/PSMD14/FIS1/PML/BAK1/CTSD/DAPK1/S100A8/VCP/MTCH1/PICALM/BAX/GSN/MYC/LGMN/ARL6IP5/ADRM1/APH1A/BCL2L13/TRADD/NCSTN/S100A9/PDCD6/HIP1R/EGLN3/BCAP31/PERP	42
BP	GO:1904358	positive regulation of telomere maintenance via telomere lengthening	14/2365	36/18862	5.82751e-05	0.00102816	0.000793862	TCP1/XRCC5/CCT2/CCT4/HNRNPA1/CCT3/CCT7/CCT5/PKIB/DKC1/CCT8/HNRNPA2B1/DHX36/MAPK3	14
BP	GO:2001235	positive regulation of apoptotic signaling pathway	32/2365	126/18862	6.11696e-05	0.0010735	0.000828869	NUPR1/TPD52L1/RPL11/TNFSF10/RNF183/BCL2/RACK1/NKX3-1/CAV1/RPL26/RPS7/TGFBR1/TNFRSF12A/FIS1/PML/SFPQ/BCLAF1/S100A8/TP53/DDIT3/ATF3/PPP1CA/SOD1/G0S2/BAX/NCK1/PPP2R1B/STYXL1/HYAL2/S100A9/BCAP31/RBCK1	32
BP	GO:0036003	positive regulation of transcription from RNA polymerase II promoter in response to stress	11/2365	24/18862	6.12007e-05	0.0010735	0.000828869	MUC1/CHD6/VEGFA/TP53/DDIT3/ATF3/NFE2L2/HIF1A/CEBPB/GCN1/HSPA5	11
BP	GO:0039528	cytoplasmic pattern recognition receptor signaling pathway in response to virus	13/2365	32/18862	6.25032e-05	0.00109198	0.000843134	DDX58/IFIH1/NOP53/BIRC3/LSM14A/PHB2/C1QBP/NPLOC4/DDX60/USP15/RIOK3/UFD1/TSPAN6	13
BP	GO:1901796	regulation of signal transduction by p53 class mediator	41/2365	177/18862	6.2616e-05	0.00109198	0.000843134	RPL5/CD74/HDAC2/RPL11/MUC1/BCL2/RPF2/NOP53/RPL26/RPS7/PAK1IP1/NOC2L/HDAC1/RAD1/TP53RK/MEAF6/PML/CSNK2B/PTTG1IP/EHMT2/TAF11/TP53/KDM1A/BARD1/HNRNPK/SSRP1/RBBP4/RFC4/TAF7/CSNK2A1/AKT1/PHF20/PRKAA1/AURKA/DDX5/RFC3/TAF15/MIF/TPX2/MDM4/TAF6	41
BP	GO:0000470	maturation of LSU-rRNA	12/2365	28/18862	6.39962e-05	0.00111283	0.000859236	RPF2/RPL10A/NIFK/WDR12/GTPBP4/DDX18/RPL35/RPF1/RPL7L1/RSL1D1/NSA2/SNU13	12
BP	GO:1902850	microtubule cytoskeleton organization involved in mitosis	35/2365	143/18862	6.45979e-05	0.00112007	0.000864822	STMN1/RAN/RAE1/DYNLT1/LSM14A/VPS4B/RAB11A/NUDC/HSPA1A/MCPH1/DRG1/INTS13/SMC3/MISP/VCP/TTK/TPR/HNRNPU/NUP62/KIF2A/CLTC/MZT1/AURKA/FLNA/CCNB1/NUF2/CDC20/SBDS/TPX2/GOLGA2/NUSAP1/CHMP1B/RMDN1/CHMP4C/PTPA	35
BP	GO:1990778	protein localization to cell periphery	66/2365	329/18862	6.6335e-05	0.00114687	0.000885514	GBP1/S100A10/AGR2/TESC/OPTN/RACK1/CAV1/KIF5B/CD81/RDX/RAB11A/LGALS3/ATP1B3/ITGA3/SQSTM1/CIB1/MISP/TSPAN15/PIK3R1/CDH1/RILPL2/LAMA5/ARL3/GOLPH3L/AMN/RAB34/SLC9A3R2/TMBIM1/AP2M1/ARL13B/VAMP5/CRB3/RAMP1/DAG1/SEC16A/PKP3/PICALM/TMED2/CLTC/AKT1/SPTBN1/SMURF1/EPHA2/GAK/ARHGEF16/MAP7/FLNA/SEC23A/GOLGA7/CLSTN1/ARL6IP5/FLOT2/MMP14/EZR/TPBG/RAB13/F11R/KRT18/IFT20/ARF6/RER1/VTI1B/BSG/ATP1B1/GOLPH3/TNFRSF1A	66
BP	GO:0051656	establishment of organelle localization	82/2365	431/18862	6.65236e-05	0.00114687	0.000885514	MX1/NPM1/LGALS9/AREG/KIF1A/SERPINA1/RAN/CDC42/DYNLT1/PTGDS/VPS4B/KIF5B/RAB11A/MLPH/S100A13/KIFAP3/NUDC/BOD1/MCPH1/MISP/FNBP1L/ACTR3/DTNBP1/YWHAZ/PDCD10/LAMP1/MYO1B/CHP1/SNX4/LLGL2/PEF1/TMED10/MYO6/TANC2/HNRNPU/NUP62/SEC24D/MAP2/SEC16A/TCIRG1/PICALM/TMED2/HIF1A/SEC31A/CENPF/SYNE2/MYO1E/SEC23A/NMD3/KIF2C/TMED9/CCNB1/MYO1C/AP3D1/ARF1/FES/YKT6/NUF2/NECTIN2/ARMCX3/EZR/TGFA/SNAP29/STARD3NL/HOOK3/WASL/C…	82
BP	GO:0010822	positive regulation of mitochondrion organization	24/2365	84/18862	6.81005e-05	0.00117071	0.000903922	TNFSF10/TFDP2/SFN/BCL2/FAM162A/YWHAB/PDCD5/CHCHD10/ATP5IF1/BNIP3/YWHAQ/FIS1/BAK1/VDAC1/TP53/YWHAZ/YWHAE/MAPK8/BAX/HIF1A/BIK/HIP1R/YWHAG/PLAUR	24
BP	GO:0006487	protein N-linked glycosylation	22/2365	74/18862	7.01914e-05	0.00120322	0.000929029	TMEM165/DPM1/OST4/MGAT4B/OSTC/SRD5A3/DPM2/KRTCAP2/ALG13/UBE2J1/MGAT2/MGAT1/STT3A/B4GALT1/SLC39A8/LMAN1/DPM3/DAD1/MAGT1/ALG3/RPN1/PMM1	22
BP	GO:0019885	antigen processing and presentation of endogenous peptide antigen via MHC class I	9/2365	17/18862	7.10598e-05	0.00121466	0.000937858	HLA-B/AZGP1/TAP1/B2M/HLA-C/HLA-E/TAP2/HLA-F/HLA-A	9
BP	GO:0006220	pyrimidine nucleotide metabolic process	17/2365	50/18862	7.24959e-05	0.00123571	0.00095411	TDG/AK3/UPP1/CTPS1/TBPL1/UNG/UMPS/NME7/NME1/MBD4/TYMS/TYMP/DCTPP1/NME3/NTHL1/NT5C/SMUG1	17
BP	GO:1900026	positive regulation of substrate adhesion-dependent cell spreading	15/2365	41/18862	7.33399e-05	0.00124657	0.000962498	S100A10/FGB/FGG/FGA/CDC42/P4HB/CIB1/C1QBP/ARPC2/DOCK5/FLNA/CRKL/MDK/RAC1/RAC3	15
BP	GO:0048732	gland development	79/2365	413/18862	7.44578e-05	0.00126202	0.000974424	MAFB/TBX3/CRIP1/SOX2/BCL2/PTN/ID2/NKX3-1/PBX1/PCNA/CAV1/CDC42/ADA/PROX1/MET/SIX1/ELF3/SMARCC1/TGFBR1/SOX9/FSTL3/PRDX2/PML/CEBPG/ITGA2/UCP2/VEGFA/CEACAM1/KDM5B/OAS2/PHB2/SLC29A1/MESP1/CDH1/UMPS/AK4/LAMA5/LMO4/SEC63/EZH2/NME1/HPN/DAG1/SOD1/CLDN1/AKT1/PAM/BAX/TYMS/UPF2/AURKA/EPHA2/HIF1A/TGFBR2/CEBPB/PNPT1/CRKL/TGM2/HES1/ANXA1/IRS2/MAPK3/IGSF3/FA2H/NCOR2/APRT/ZBTB7B/PSEN1/MDK/GPAT4/KRT18/DDR1/TSPO/AR…	79
BP	GO:0006903	vesicle targeting	26/2365	95/18862	7.69522e-05	0.00130064	0.00100425	AREG/SERPINA1/CHP1/PEF1/TMED10/SEC24D/SEC16A/TMED2/SEC31A/SEC23A/TMED9/YKT6/TGFA/SNAP29/STARD3NL/CD59/GOLGA2/TRAPPC4/PSEN1/BET1/LMAN1/PDCD6/CSNK1D/USO1/RAB1B/SEC13	26
BP	GO:0090090	negative regulation of canonical Wnt signaling pathway	41/2365	179/18862	8.18633e-05	0.00137979	0.00106535	PSMB9/PSMB1/PSMB8/PSMA4/MAD2L2/SOX2/PSMC4/PSMA7/IGFBP2/IGFBP4/CAV1/PSME2/PSME1/PSMD14/PSMA5/SOX9/PSMB2/HDAC1/PSMA3/PSMD8/CTHRC1/RUVBL2/CSNK1A1/MESP1/PSMD1/PSMD7/DDIT3/PSMD4/PSMA1/PSMD11/PSMC3/PSMD6/AMFR/PSMD2/PSMD3/CTNND1/EGR1/DVL1/JADE1/TLE1/MDK	41
BP	GO:0000462	maturation of SSU-rRNA from tricistronic rRNA transcript (SSU-rRNA, 5.8S rRNA, LSU-rRNA)	14/2365	37/18862	8.29868e-05	0.00139483	0.00107697	RPS19/RPS8/RPS14/RPP40/RCL1/RPS21/RPS16/UTP4/DCAF13/NOL10/BMS1/BYSL/GTF2H5/FAM207A	14
BP	GO:0061458	reproductive system development	78/2365	408/18862	8.40179e-05	0.00140823	0.00108732	SPP1/RPS6/NUPR1/HSP90AB1/TESC/AKR1C3/SYCP2/TNFSF10/BASP1/ASCL2/TBX3/CRIP1/BCL2/PTN/NKX3-1/NASP/ADA/ST14/SDC1/CSDE1/MSH2/EPAS1/SMARCC1/TGFBR1/C3/SOX9/ERCC1/SPINT1/HEY1/COL9A3/FSTL3/BAK1/HSD17B4/VEGFA/TFAP2C/SPINT2/RRM1/KDM5B/ADAM15/GJB3/RSPO3/YBX3/ANG/SOD1/TMED2/AKT1/EREG/BAX/PLEKHA1/HIF1A/CEBPB/NIPBL/FZD5/FLNA/KRT8/NCOA4/UBE2Q1/CRKL/HES1/ANXA1/ADM/MAPK3/PHLDA2/EIF2S2/HMGB2/MMP14/PRDX4/IMMP2L/RAB1…	78
BP	GO:0048511	rhythmic process	60/2365	294/18862	8.4461e-05	0.00141174	0.00109003	HDAC2/NDUFA9/CDK4/RACK1/PTN/ID2/PCNA/CAVIN3/PPP1CC/PTGDS/ADA/OPN3/PROX1/JUN/ID1/AHCY/HDAC1/PML/SFPQ/NAMPT/KDM5B/HNRNPR/TP53/NR2F6/THRAP3/KLF9/MAPK8/ID3/AHR/EZH2/PPP1CA/PPP1CB/HNRNPU/SUV39H2/HDAC3/RORC/CSNK2A1/PAM/EREG/MAGED1/TYMS/PRKAA1/PLEKHA1/DDX5/PER1/CLDN4/HEBP1/BHLHE40/JUND/KDM2A/CDK1/EGR1/CSNK1E/GNAQ/NCOR2/MDK/CSNK1D/TOP2A/NMU/HSPA5	60
BP	GO:0010833	telomere maintenance via telomere lengthening	23/2365	80/18862	8.61811e-05	0.00143651	0.00110915	HSP90AB1/HSP90AA1/TCP1/PARP1/XRCC5/CCT2/CCT4/HNRNPA1/CCT3/CCT7/CCT5/PTGES3/PKIB/DKC1/HNRNPC/CCT8/HNRNPU/RFC1/HNRNPA2B1/DHX36/MAPK3/TNKS1BP1/NOP10	23
BP	GO:2000573	positive regulation of DNA biosynthetic process	20/2365	65/18862	8.69242e-05	0.00144491	0.00111563	HSP90AB1/HSP90AA1/TCP1/XRCC5/CCT2/CCT4/HNRNPA1/CCT3/PCNA/CCT7/CCT5/PTGES3/PKIB/DKC1/NVL/CCT8/RFC4/MYC/RFC3/MAPK3	20
BP	GO:0072332	intrinsic apoptotic signaling pathway by p53 class mediator	22/2365	75/18862	8.76925e-05	0.00145367	0.0011224	IFI16/NUPR1/CD74/RPL11/MUC1/BCL2/RPL26/RPS7/MSH2/PML/PTTG1IP/TP53/KDM1A/HNRNPK/TOPORS/DDIT4/BAX/HINT1/DDX5/SHISA5/MIF/PERP	22
BP	GO:0006901	vesicle coating	21/2365	70/18862	8.80288e-05	0.00145525	0.00112362	AREG/SERPINA1/PEF1/TMED10/SEC24D/SEC16A/TMED2/SEC31A/SEC23A/TMED9/TGFA/CD59/GOLGA2/TRAPPC4/BET1/LMAN1/PDCD6/CSNK1D/USO1/RAB1B/SEC13	21
BP	GO:1902570	protein localization to nucleolus	8/2365	14/18862	8.98087e-05	0.00147658	0.00114009	GLUL/RAN/RPF2/NOP53/NOL8/NVL/BYSL/NMD3	8
BP	GO:1904814	regulation of protein localization to chromosome, telomeric region	8/2365	14/18862	8.98087e-05	0.00147658	0.00114009	TCP1/CCT2/CCT4/CCT3/CCT7/CCT5/DKC1/CCT8	8
BP	GO:0032206	positive regulation of telomere maintenance	17/2365	51/18862	9.61435e-05	0.00157644	0.00121719	TCP1/XRCC5/CCT2/CCT4/HNRNPA1/CCT3/CCT7/CCT5/ERCC1/PML/PKIB/DKC1/CCT8/HNRNPA2B1/DHX36/NABP2/MAPK3	17
BP	GO:0042063	gliogenesis	58/2365	283/18862	9.7381e-05	0.0015924	0.00122952	PHGDH/CXCR4/HDAC2/IDH2/SOX4/ASCL2/MXRA8/MYB/NFIB/SOX2/PTN/CD9/PPP1CC/SOX9/SPINT1/BNIP3/HDAC1/BACE2/GSTP1/S100A8/CNP/ITGB4/TMEM98/EIF2B3/UFL1/EZH2/GBA/DAG1/SOD1/CERS2/PRPF19/CLCF1/ERBB2/AKT1/CLU/METRN/GSN/SYNE2/P2RX4/CRKL/HES1/ANXA1/CDK1/EEF2/MAPK3/MMP14/FA2H/IL6ST/TNFRSF21/NDRG1/PSEN1/MDK/NCSTN/GRN/S100A9/ERBB3/TSPO/PTPN11	58
BP	GO:0048524	positive regulation of viral process	25/2365	91/18862	9.80601e-05	0.00159917	0.00123475	CD74/HLA-DRB1/LGALS9/HACD3/NELFCD/CAV2/IFIT1/P4HB/VPS4B/STAU1/PPIH/POLR2L/POLR2I/LGALS1/CNOT7/SRPK1/TMPRSS4/POLR2G/TRIM38/VAPB/NELFA/PPIA/CHMP4C/TOP2A/POLR2J	25
BP	GO:0030111	regulation of Wnt signaling pathway	71/2365	365/18862	9.88402e-05	0.00160755	0.00124122	PSMB9/PSMB1/SOX4/PSMB8/PSMA4/MAD2L2/SOX2/SNX3/RACK1/PSMC4/PSMA7/IGFBP2/IGFBP4/CAV1/PSME2/PLEKHA4/PSME1/PSMD14/TMEM237/PSMA5/SOX9/PSMB2/PPP2R1A/HDAC1/ITGA3/TSKU/PSMA3/PSMD8/CTHRC1/RUVBL2/RUVBL1/CSNK1A1/VCP/MESP1/PSMD1/PSMD7/DDIT3/RSPO3/PSMD4/HMGXB4/PSMA1/PSMD11/GID8/PPP1CA/YAP1/SMARCA4/PSMC3/PPP2CA/CSNK2A1/PSMD6/AMFR/PSMD2/CDC73/PSMD3/CTNND1/EGR1/DVL1/CSNK1E/GNAQ/XIAP/JADE1/TLE1/COL1A1/PSEN1/MDK/T…	71
BP	GO:1901657	glycosyl compound metabolic process	32/2365	129/18862	9.93131e-05	0.0016109	0.0012438	AKR1C2/AKR1C3/CDA/GMPS/MTAP/RAN/AKR1B10/ADA/AK3/AHCY/NT5C3A/UPP1/PRPSAP2/AKR1C1/GNAI3/UMPS/AK4/NME7/APOBEC3G/PRTFDC1/ATIC/GBA/NME1/NT5E/GLA/TYMP/PRPS2/FUCA1/APRT/NME3/TK1/NT5C	32
BP	GO:0046598	positive regulation of viral entry into host cell	7/2365	11/18862	0.000100493	0.00161701	0.00124852	CD74/HLA-DRB1/LGALS9/P4HB/LGALS1/TMPRSS4/TRIM38	7
BP	GO:0075294	positive regulation by symbiont of entry into host	7/2365	11/18862	0.000100493	0.00161701	0.00124852	CD74/HLA-DRB1/LGALS9/P4HB/LGALS1/TMPRSS4/TRIM38	7
BP	GO:0075522	IRES-dependent viral translational initiation	7/2365	11/18862	0.000100493	0.00161701	0.00124852	SSB/CSDE1/EIF3D/EIF3F/DENR/EIF3B/PCBP2	7
BP	GO:0009144	purine nucleoside triphosphate metabolic process	24/2365	86/18862	0.000102515	0.00164515	0.00127025	ATP5F1C/PARP1/RAN/TMSB4X/SAMHD1/ENO1/ATP5F1B/ADA/ATP5ME/AK3/ATP5PB/STOML2/ATP5MC3/ITPA/ATP5F1A/VCP/GNAI3/AK4/NME7/NME1/ALDOA/ATP6V1A/NME3/ATP5MG	24
BP	GO:0048207	vesicle targeting, rough ER to cis-Golgi	20/2365	66/18862	0.000110168	0.00175568	0.00135559	AREG/SERPINA1/PEF1/TMED10/SEC24D/SEC16A/TMED2/SEC31A/SEC23A/TGFA/CD59/GOLGA2/TRAPPC4/BET1/LMAN1/PDCD6/CSNK1D/USO1/RAB1B/SEC13	20
BP	GO:0048208	COPII vesicle coating	20/2365	66/18862	0.000110168	0.00175568	0.00135559	AREG/SERPINA1/PEF1/TMED10/SEC24D/SEC16A/TMED2/SEC31A/SEC23A/TGFA/CD59/GOLGA2/TRAPPC4/BET1/LMAN1/PDCD6/CSNK1D/USO1/RAB1B/SEC13	20
BP	GO:0050818	regulation of coagulation	21/2365	71/18862	0.000110391	0.00175568	0.00135559	FGB/F3/FGG/FGA/TFPI/SERPING1/CD9/CAV1/TSPAN8/PLAU/PRDX2/CEACAM1/PROS1/EDN1/PROCR/NFE2L2/ANXA5/ST3GAL4/PSEN1/VKORC1/PLAUR	21
BP	GO:0016049	cell growth	87/2365	470/18862	0.000110842	0.00175568	0.00135559	SPP1/CDKN2A/HSP90AB1/CXCR4/BTG1/HSP90AA1/IGFBP3/CDA/MAD2L2/RERG/BCL11A/SFN/SEMA3B/BCL2/RACK1/PLAA/GNG4/IGFBP4/SLC25A33/CDC42/ENO1/SDCBP/SMARCA2/RAB11A/TGFBR1/SOX9/PPP2R1A/HSPA1A/PML/ATAD3A/CIB1/VEGFA/CEACAM1/FXN/S100A8/TP53/ADAM15/TMEM97/NDUFS3/EDN1/HYAL1/TMC8/EXOSC9/SMARCA4/HPN/BST2/KRT17/SCGB3A1/MAP2/DBN1/PPP2CA/ALCAM/ERBB2/CSNK2A1/EI24/AKT1/OGFR/CDK11B/SMURF1/AURKA/TGFBR2/DCBLD2/NET1/SIPA1/CRK…	87
BP	GO:0043281	regulation of cysteine-type endopeptidase activity involved in apoptotic process	45/2365	205/18862	0.000110858	0.00175568	0.00135559	IFI6/F3/LGALS9/HSPD1/TNFSF10/HSPE1/CASP8AP2/SFN/SOX2/FAM162A/PDCD2/RACK1/NKX3-1/PDCD5/HMGB1/FIS1/PML/BAK1/CTSD/VEGFA/DAPK1/S100A8/VCP/YWHAE/CAAP1/MTCH1/CSNK2A1/AKT1/BAX/GSN/MYC/PRDX5/ARL6IP5/NOL3/BCL2L13/XIAP/TRADD/MAGEA3/S100A9/PDCD6/HIP1R/EGLN3/BCAP31/DHCR24/PLAUR	45
BP	GO:0048608	reproductive structure development	77/2365	405/18862	0.000111918	0.00176783	0.00136497	SPP1/RPS6/NUPR1/HSP90AB1/TESC/AKR1C3/SYCP2/TNFSF10/BASP1/ASCL2/TBX3/CRIP1/BCL2/PTN/NKX3-1/NASP/ADA/ST14/SDC1/CSDE1/MSH2/EPAS1/SMARCC1/TGFBR1/C3/SOX9/ERCC1/SPINT1/HEY1/COL9A3/FSTL3/BAK1/HSD17B4/VEGFA/TFAP2C/SPINT2/RRM1/KDM5B/ADAM15/GJB3/RSPO3/YBX3/ANG/SOD1/TMED2/AKT1/EREG/BAX/PLEKHA1/HIF1A/CEBPB/NIPBL/FZD5/FLNA/KRT8/NCOA4/CRKL/HES1/ANXA1/ADM/MAPK3/PHLDA2/EIF2S2/HMGB2/MMP14/PRDX4/IMMP2L/RAB13/ICAM1…	77
BP	GO:0009163	nucleoside biosynthetic process	14/2365	38/18862	0.000116326	0.00183267	0.00141503	CDA/GMPS/MTAP/ADA/UPP1/UMPS/NME7/PRTFDC1/NME1/NT5E/TYMP/APRT/NME3/TK1	14
BP	GO:2000134	negative regulation of G1/S transition of mitotic cell cycle	30/2365	119/18862	0.000118224	0.00185771	0.00143437	CDKN2A/MUC1/SOX4/TFDP2/CDK4/SFN/BCL2/PCNA/CDKN2B/BTG2/RPL26/PML/ZNF655/PRMT1/TP53/CNOT7/EZH2/BAX/AURKA/CDK2AP2/CNOT2/CDC73/CDK1/CCNB1/JADE1/ARID3A/TNKS1BP1/MDM4/CNOT11/CCND1	30
BP	GO:0001558	regulation of cell growth	77/2365	406/18862	0.000121496	0.00190053	0.00146743	SPP1/CDKN2A/CXCR4/BTG1/IGFBP3/CDA/MAD2L2/RERG/BCL11A/SFN/SEMA3B/BCL2/RACK1/PLAA/GNG4/IGFBP4/SLC25A33/CDC42/ENO1/SDCBP/SMARCA2/RAB11A/TGFBR1/PPP2R1A/HSPA1A/PML/ATAD3A/CIB1/VEGFA/CEACAM1/FXN/S100A8/TP53/ADAM15/TMEM97/NDUFS3/EDN1/HYAL1/TMC8/EXOSC9/SMARCA4/HPN/BST2/KRT17/SCGB3A1/MAP2/DBN1/PPP2CA/ERBB2/CSNK2A1/EI24/AKT1/OGFR/CDK11B/SMURF1/DCBLD2/NET1/SIPA1/CRKL/CLSTN1/CDC73/MAP3K13/SLC44A4/MMP14/SEMA4…	77
BP	GO:0031123	RNA 3'-end processing	36/2365	153/18862	0.000121894	0.00190053	0.00146743	FBL/SSB/EXOSC5/SRRM1/SRSF3/CDC40/MAGOH/RPS21/EXOSC3/MAGOHB/SRSF7/DKC1/ERI3/MTPAP/SLU7/TRMT10C/BARD1/SNRPA/SRSF2/EXOSC9/CPSF6/EXOSC8/DDX39A/NCBP2/RBM8A/SRSF4/DHX36/PNPT1/SRSF11/CDC73/CCNB1/RNF20/HSD17B10/AHCYL1/THOC6/SLBP	36
BP	GO:0046661	male sex differentiation	36/2365	153/18862	0.000121894	0.00190053	0.00146743	NUPR1/TESC/AKR1C3/SYCP2/TNFSF10/TBX3/BCL2/NKX3-1/NASP/SDC1/CSDE1/MSH2/TGFBR1/SOX9/ERCC1/COL9A3/FSTL3/HSD17B4/TFAP2C/RRM1/ADAM15/YBX3/BAX/PLEKHA1/FLNA/NCOA4/CRKL/EIF2S2/HMGB2/MMP14/PRDX4/RAB13/ICAM1/BIK/MGST1/CCND1	36
BP	GO:0017038	protein import	43/2365	194/18862	0.0001237	0.00191878	0.00148152	HSP90AB1/HSPD1/HSP90AA1/RAN/ANGPT1/PDCD5/APOD/CSE1L/RBM22/PEX26/HSPA4/PEX3/PML/TOMM20/PTTG1IP/PKIG/PIK3R1/PHB2/TP53/CDH1/KPNA3/HSPA8/TIMM17A/CHP1/DNAJC15/TPR/IPO9/TIMM17B/NUP62/TIMM50/HDAC3/AKT1/CLU/ROMO1/RPAIN/FLNA/NOLC1/TOMM7/TXNIP/HYAL2/PSEN1/NFKBIA/SEC13	43
BP	GO:0071897	DNA biosynthetic process	43/2365	194/18862	0.0001237	0.00191878	0.00148152	UBE2L6/ISG15/HSP90AB1/RPS27A/HSP90AA1/TCP1/MAD2L2/XRCC5/CCT2/CCT4/HNRNPA1/CCT3/PCNA/CCT7/DUSP1/CCT5/PTGES3/PKIB/DKC1/TP53/VCP/HNRNPC/POLE4/LIG1/POLD4/POLE3/NVL/NPLOC4/CCT8/HNRNPU/RFC4/RFC1/TYMS/MYC/CENPF/HNRNPA2B1/RFC3/MAPK3/TNKS1BP1/NOP10/PPIA/TK1/UFD1	43
BP	GO:0030178	negative regulation of Wnt signaling pathway	46/2365	212/18862	0.000124984	0.00193373	0.00149306	PSMB9/PSMB1/PSMB8/PSMA4/MAD2L2/SOX2/RACK1/PSMC4/PSMA7/IGFBP2/IGFBP4/CAV1/PSME2/PSME1/PSMD14/PSMA5/SOX9/PSMB2/HDAC1/TSKU/PSMA3/PSMD8/CTHRC1/RUVBL2/CSNK1A1/MESP1/PSMD1/PSMD7/DDIT3/PSMD4/HMGXB4/PSMA1/PSMD11/PSMC3/PSMD6/AMFR/PSMD2/PSMD3/CTNND1/EGR1/DVL1/JADE1/TLE1/MDK/TAX1BP3/CBY1	46
BP	GO:0009223	pyrimidine deoxyribonucleotide catabolic process	9/2365	18/18862	0.000126304	0.00194418	0.00150113	TDG/UPP1/UNG/MBD4/TYMP/DCTPP1/NTHL1/NT5C/SMUG1	9
BP	GO:0070200	establishment of protein localization to telomere	9/2365	18/18862	0.000126304	0.00194418	0.00150113	TCP1/CCT2/CCT4/CCT3/CCT7/CCT5/DKC1/CCT8/NABP2	9
BP	GO:0009112	nucleobase metabolic process	13/2365	34/18862	0.000131008	0.00201145	0.00155307	CDA/SHMT1/GMPS/ADA/RRM1/CTPS1/KDM1A/SHMT2/UMPS/PAICS/TYMS/TYMP/APRT	13
BP	GO:0022604	regulation of cell morphogenesis	61/2365	305/18862	0.000134186	0.00205248	0.00158475	GBP1/S100A10/CXCR4/FGB/FGG/FGA/TACSTD2/BCL11A/RHOB/PTN/PLAA/CDC42/P4HB/PRPF40A/CAPRIN1/RDX/HCK/ITGB2/S100A13/RHOD/PLXNB2/CIB1/VEGFA/FBLIM1/PHIP/RHOF/PLEKHO1/C1QBP/RND3/HPN/DAG1/ALDOA/CAPZB/DBN1/BAIAP2/ZMYM4/ARPC2/SMURF1/SHROOM3/TPM1/DOCK5/FLNA/DHX36/CLDN4/CRKL/ANXA1/CDC42SE1/FES/DVL1/MKLN1/RHOC/MAP3K13/EZR/NEDD4L/ICAM1/MDK/F11R/SPAG9/RAC1/RAC3/MSN	61
BP	GO:0048678	response to axon injury	22/2365	77/18862	0.000134701	0.00205248	0.00158475	SPP1/NREP/DPYSL3/BCL2/PTN/APOD/BNIP3/KLK8/LGALS1/TXN2/CHL1/STK24/DAG1/SOD1/CERS2/BAX/FLNA/ARF4/P2RX4/GRN/TSPO/PTPRF	22
BP	GO:0051205	protein insertion into membrane	22/2365	77/18862	0.000134701	0.00205248	0.00158475	HSP90AA1/TFDP2/SFN/BCL2/RTP4/YWHAB/PDCD5/HSPA4/TRAM1/YWHAQ/TP53/YWHAZ/YWHAE/TIMM10/BCS1L/MAPK8/BAX/ROMO1/TIMM8B/YWHAG/EMC10/EMC7	22
BP	GO:0002218	activation of innate immune response	35/2365	148/18862	0.000135182	0.00205463	0.00158641	IFI16/PSMB9/PSMB1/MUC1/HSP90AA1/PSMB8/PSMA4/XRCC5/MUCL1/PSMC4/PSMA7/PSME2/HMGB1/MUC4/PSME1/PSMD14/MUC16/PSMA5/HCK/PSMB2/CGAS/SFPQ/PSMA3/PSMD8/SKP1/PSMD1/PSMD7/PSMD4/PSMA1/PSMD11/PSMC3/PSMD6/PSMD2/PSMD3/ICAM3	35
BP	GO:0046677	response to antibiotic	15/2365	43/18862	0.000137188	0.00207988	0.0016059	HSP90AA1/CRIP1/ZC3H8/KDM5B/TP53/KDM1A/HYAL1/CYB5R4/EZH2/SOD1/PPP2CB/HYAL2/RSRC1/VKORC1/HSPA5	15
BP	GO:2001236	regulation of extrinsic apoptotic signaling pathway	36/2365	154/18862	0.000140186	0.00212	0.00163689	IFI6/FGB/FGG/FGA/TNFSF10/BCL2/CAV1/EYA2/TGFBR1/LGALS3/ARHGEF2/TNFRSF12A/HSPA1A/PRDX2/PML/PHIP/GSTP1/SP100/TMC8/EYA3/ITGAV/ATF3/TMBIM1/PPP1CA/YAP1/G0S2/AKT1/GCLM/NOL3/PPP2R1B/HMGB2/TRADD/CTTN/HYAL2/ICAM1/RBCK1	36
BP	GO:0009314	response to radiation	83/2365	447/18862	0.000141711	0.00213771	0.00165056	IFI16/NPM1/TIMP1/PARP1/XRCC5/RHOB/CXCL10/CRIP1/BCL2/PTN/ID2/PCNA/ABCA7/PPP1CC/RPL26/NUCKS1/OPN3/PPP1R1B/DUSP1/MSH2/JUN/ERCC1/EEF1D/NOC2L/RAD1/PML/BAK1/RRM1/USP1/PIK3R1/MSH6/METAP2/DCLRE1C/RUVBL2/SLC7A11/TP53/KDM1A/RAD51AP1/NR2F6/MAPK8/HYAL1/ITGB6/EYA3/REEP6/SDE2/RNF168/PPP1CA/YAP1/COPS3/PPP1CB/BABAM2/UVSSA/INIP/AKT1/BAX/PRKAA1/CDS1/MYC/GTF2H5/FEN1/HIF1A/NIPBL/TP53I13/NET1/DHX36/PER1/BHLHE40/JUND/…	83
BP	GO:0010499	proteasomal ubiquitin-independent protein catabolic process	10/2365	22/18862	0.000145083	0.00218312	0.00168562	PSMB9/PSMB1/PSMB8/PSMA4/PSMA7/PSMA5/PSMB2/PSMA3/PSMA1/NFE2L2	10
BP	GO:0009264	deoxyribonucleotide catabolic process	11/2365	26/18862	0.000149043	0.00223713	0.00172732	SAMHD1/TDG/ADA/UPP1/UNG/MBD4/TYMP/DCTPP1/NTHL1/NT5C/SMUG1	11
BP	GO:0006692	prostanoid metabolic process	16/2365	48/18862	0.000153226	0.00228287	0.00176264	CD74/AKR1C2/AKR1C3/HPGD/PLAA/PTGDS/PTGR1/PTGES3/GSTP1/AKR1C1/EDN1/CBR1/ANXA1/PTGES/MIF/TNFRSF1A	16
BP	GO:0006693	prostaglandin metabolic process	16/2365	48/18862	0.000153226	0.00228287	0.00176264	CD74/AKR1C2/AKR1C3/HPGD/PLAA/PTGDS/PTGR1/PTGES3/GSTP1/AKR1C1/EDN1/CBR1/ANXA1/PTGES/MIF/TNFRSF1A	16
BP	GO:0042398	cellular modified amino acid biosynthetic process	16/2365	48/18862	0.000153226	0.00228287	0.00176264	SHMT1/PLSCR1/ALDH7A1/ALDH9A1/GCLC/ACADM/SLC7A11/ATIC/MTHFD1/NFE2L2/MGST2/GGCT/CNDP2/GCLM/PLOD3/PLOD2	16
BP	GO:0051262	protein tetramerization	23/2365	83/18862	0.000159181	0.00236576	0.00182664	HLA-DRB1/AQP5/GBP5/SHMT1/APIP/B2M/SAMHD1/ALDH9A1/FARSB/RRM1/TP53/SHMT2/CRYZ/CPSF6/ALDOA/HSD17B8/HSD17B10/GOLGA2/TK1/KRT10/USP16/ACOT13/CBY1	23
BP	GO:0022409	positive regulation of cell-cell adhesion	56/2365	276/18862	0.000167643	0.00248539	0.00191901	HLA-DRA/CD74/HLA-DRB1/HLA-DPA1/FGB/FGG/LGALS9/HLA-DPB1/FGA/HSPD1/SOX4/MYB/SOX2/HSPH1/IGFBP2/CAV1/CDC42/CD55/HMGB1/HLA-E/ADA/CD81/CD24/CEACAM6/ITGB2/HLA-DMB/KIFAP3/FSTL3/PIK3R1/LGALS1/MAP3K8/ADAM8/TJP1/AKT1/PIEZO1/TGFBR2/ST3GAL4/HES1/NCK1/ANXA1/AP3D1/FLOT2/IL6ST/HLA-A/ZBTB7B/ICAM1/MDK/F11R/SELENOK/RAC1/RUNX1/IL27RA/PTPN11/XBP1/CD46/PLAUR	56
BP	GO:0007004	telomere maintenance via telomerase	20/2365	68/18862	0.000173638	0.00256797	0.00198277	HSP90AB1/HSP90AA1/TCP1/XRCC5/CCT2/CCT4/HNRNPA1/CCT3/CCT7/CCT5/PTGES3/PKIB/DKC1/HNRNPC/CCT8/HNRNPU/RFC1/MAPK3/TNKS1BP1/NOP10	20
BP	GO:0038061	NIK/NF-kappaB signaling	41/2365	185/18862	0.000176052	0.0025973	0.00200542	PSMB9/PSMB1/LGALS9/PSMB8/PSMA4/EIF2AK2/PSMC4/PSMA7/TMSB4X/PSME2/BIRC3/HMGB1/PSME1/PSMD14/PSMA5/PSMB2/PSMA3/NMI/PSMD8/SKP1/PHB2/PSMD1/PSMD7/EDN1/PSMD4/PSMA1/PSMD11/PDCD4/PSMC3/AKT1/PSMD6/PSMD2/TRIP6/PSMD3/NOL3/TRADD/PPP4C/NFKBIA/TSPAN6/RBCK1/TRAF4	41
BP	GO:0051650	establishment of vesicle localization	45/2365	209/18862	0.000177284	0.0026091	0.00201453	MX1/AREG/KIF1A/SERPINA1/KIF5B/RAB11A/MLPH/KIFAP3/FNBP1L/DTNBP1/MYO1B/CHP1/PEF1/TMED10/MYO6/TANC2/SEC24D/MAP2/SEC16A/TCIRG1/PICALM/TMED2/SEC31A/MYO1E/SEC23A/TMED9/MYO1C/AP3D1/ARF1/YKT6/TGFA/SNAP29/STARD3NL/WASL/CD59/GOLGA2/TRAPPC4/PSEN1/BET1/LMAN1/PDCD6/CSNK1D/USO1/RAB1B/SEC13	45
BP	GO:0042771	intrinsic apoptotic signaling pathway in response to DNA damage by p53 class mediator	15/2365	44/18862	0.000184213	0.00270427	0.00208801	IFI16/NUPR1/CD74/MUC1/BCL2/RPL26/MSH2/PML/TP53/KDM1A/HNRNPK/TOPORS/DDIT4/SHISA5/MIF	15
BP	GO:1905898	positive regulation of response to endoplasmic reticulum stress	13/2365	35/18862	0.000184647	0.00270427	0.00208801	AGR2/RNF183/CAV1/BAK1/PIK3R1/DDIT3/PPP1R15A/NFE2L2/BAX/TMEM259/NCK1/BCAP31/XBP1	13
BP	GO:0009266	response to temperature stimulus	48/2365	228/18862	0.00019356	0.00282795	0.00218351	PSIP1/DNAJA1/HSP90AB1/CXCR4/HDAC2/HSPD1/HSP90AA1/ERO1A/FKBP4/CXCL10/HSPH1/LPL/RAE1/GCLC/DNAJC7/HSBP1/HSPA1A/PTGES3/UCP2/SLU7/VCP/NR2F6/YWHAE/HSPA8/EIF2B3/PDCL3/TPR/PLAC8/NUP62/SUMO1/SOD1/METRNL/DNAJB1/AKT1/PRKAA1/HSPA6/ATP2A2/DHX36/IER5/ADM/MAPKAPK2/CHORDC1/MAPK3/ATP2B1/DNAJC3/PDCD6/NFKBIA/SEC13	48
BP	GO:0006898	receptor-mediated endocytosis	64/2365	328/18862	0.000194057	0.00282836	0.00218382	MX1/HSP90AA1/CTSL/B2M/CLTA/CD9/HSPH1/CD63/CAV2/ANGPT1/CAV1/CD81/SDCBP/C3/ITGB2/AP2S1/VEGFA/CEACAM1/FNBP1L/ANXA2/SMAP1/HNRNPK/LRPAP1/AMN/ITGAV/AP2M1/SCARB2/APOC1/RAMP1/SNX9/PICALM/CLTC/CLU/GRK2/GAK/TGFBR2/GPR107/CAP1/HBB/SCGB3A2/CLTB/PIP5K1C/IGKC/ADM/ARF1/HYOU1/MKLN1/EZR/PDLIM7/CTTN/CXCL16/WASL/APOL1/IGHA1/AP1S1/RAC1/HIP1R/ARF6/IGLC2/RAB5A/CANX/AP2A1/CD2AP/SAA1	64
BP	GO:2001056	positive regulation of cysteine-type endopeptidase activity	35/2365	151/18862	0.000205379	0.00298615	0.00230566	IFI16/F3/ASPH/LGALS9/HSPD1/TNFSF10/HSPE1/CASP8AP2/FAM162A/PDCD2/RACK1/NKX3-1/PDCD5/HMGB1/FIS1/PML/BAK1/CTSD/DAPK1/S100A8/VCP/MTCH1/BAX/GSN/MYC/LGMN/ARL6IP5/BCL2L13/TRADD/S100A9/PDCD6/HIP1R/EGLN3/BCAP31/PERP	35
BP	GO:0048199	vesicle targeting, to, from or within Golgi	21/2365	74/18862	0.000210469	0.00305032	0.0023552	AREG/SERPINA1/PEF1/TMED10/SEC24D/SEC16A/TMED2/SEC31A/SEC23A/TMED9/TGFA/CD59/GOLGA2/TRAPPC4/BET1/LMAN1/PDCD6/CSNK1D/USO1/RAB1B/SEC13	21
BP	GO:1902600	proton transmembrane transport	36/2365	157/18862	0.000210803	0.00305032	0.0023552	C15orf48/TESC/ATP5F1C/COX6B1/TMSB4X/NDUFA4L2/ATP5F1B/ATP5ME/ATP5PB/COX7A2/COX5A/STOML2/ATP5MC3/UCP2/NDUFA4/ATP5F1A/PHB2/ATP2C1/SLC25A3/CHP1/SURF1/ATP6V1F/TCIRG1/ATP6V1G1/COX7A2L/ATP6V1B2/COX7B/ATP2A2/COX7C/CLCN3/COX6A1/ATP6V1A/CYB5A/ATP5MG/ATP6V1E1/ATP6AP1	36
BP	GO:1904589	regulation of protein import	18/2365	59/18862	0.000217744	0.00314322	0.00242693	HSP90AB1/RAN/ANGPT1/PDCD5/APOD/RBM22/PKIG/PIK3R1/CDH1/HSPA8/CHP1/TPR/NUP62/HDAC3/FLNA/NOLC1/HYAL2/PSEN1	18
BP	GO:0001894	tissue homeostasis	53/2365	260/18862	0.0002188	0.00315092	0.00243288	SPP1/AZGP1/TFF1/HSPB1/B2M/LTF/BCL2/ANGPT1/FH/CIB2/PROM1/MUC4/SLC2A1/EPAS1/SOX9/STRAP/IQCB1/GPR137B/VEGFA/BARD1/TFF3/TFF2/ITGB6/LPCAT1/TPP1/YAP1/NAPSA/RCN3/CA2/ACP5/LAMC1/SOD1/ADAM8/CLDN1/TCIRG1/TJP1/BAX/CLDN12/INAVA/LYZ/PRDX1/P2RX4/CXADR/IGKC/CLCN3/SLC39A8/IGHA1/LTBP3/F11R/RAC1/RAC3/PTPN11/ATP6AP1	53
BP	GO:0015949	nucleobase-containing small molecule interconversion	11/2365	27/18862	0.00022314	0.00319058	0.0024635	AK2/RRM1/CTPS1/GSR/AK4/NME1/TYMS/GLRX/TXNRD1/NME3/RRM2	11
BP	GO:0046386	deoxyribose phosphate catabolic process	11/2365	27/18862	0.00022314	0.00319058	0.0024635	SAMHD1/TDG/ADA/UPP1/UNG/MBD4/TYMP/DCTPP1/NTHL1/NT5C/SMUG1	11
BP	GO:0070199	establishment of protein localization to chromosome	11/2365	27/18862	0.00022314	0.00319058	0.0024635	TCP1/CCT2/CCT4/CCT3/CCT7/CCT5/DKC1/RUVBL2/CCT8/NIPBL/NABP2	11
BP	GO:0042026	protein refolding	10/2365	23/18862	0.00022793	0.00325138	0.00251044	HSPD1/HSP90AA1/B2M/HSPA9/HSPA1A/HSPA8/HSPA6/SNRNP70/ST13/HSPA5	10
BP	GO:0009411	response to UV	34/2365	146/18862	0.000228617	0.00325348	0.00251206	NPM1/TIMP1/PARP1/CRIP1/BCL2/PTN/PCNA/RPL26/OPN3/MSH2/ERCC1/NOC2L/PML/BAK1/USP1/PIK3R1/MSH6/RUVBL2/TP53/KDM1A/MAPK8/HYAL1/SDE2/UVSSA/AKT1/BAX/PRKAA1/MYC/FEN1/TP53I13/DHX36/HYAL2/UBE2A/CCND1	34
BP	GO:0072527	pyrimidine-containing compound metabolic process	23/2365	85/18862	0.000234248	0.00332577	0.00256788	CDA/TDG/AK3/NT5C3A/UPP1/RRM1/CTPS1/TBPL1/UNG/UMPS/NME7/APOBEC3G/NME1/NT5E/MBD4/TYMS/TYMP/DCTPP1/NME3/NTHL1/TK1/NT5C/SMUG1	23
BP	GO:0051101	regulation of DNA binding	29/2365	118/18862	0.000244278	0.00346003	0.00267155	IFI16/HDAC2/PARP1/MAD2L2/SRI/TMSB4X/HMGB1/JUN/ID1/HEY1/CEBPG/ITGA2/CSNK2B/ZNF462/KDM1A/SP100/CALM3/GTF2B/DDIT3/MAPK8/EDF1/NME1/SUMO1/HES1/HMGB2/PSEN1/NFKBIA/CTNNB1/PLAUR	29
BP	GO:0009205	purine ribonucleoside triphosphate metabolic process	22/2365	80/18862	0.000246982	0.00349014	0.0026948	ATP5F1C/PARP1/RAN/TMSB4X/ENO1/ATP5F1B/ATP5ME/AK3/ATP5PB/STOML2/ATP5MC3/ITPA/ATP5F1A/VCP/GNAI3/AK4/NME7/NME1/ALDOA/ATP6V1A/NME3/ATP5MG	22
BP	GO:0032970	regulation of actin filament-based process	73/2365	389/18862	0.000250293	0.00352867	0.00272454	STMN1/S100A10/TACSTD2/ABRACL/RHOB/SRI/TMSB4X/PHPT1/CAV1/CDC42/PROX1/MET/RDX/HCK/TGFBR1/ID1/ARPC5/RHOD/SVIL/RHOF/PIK3R1/ACTR3/SMIM22/EDN1/SSH3/ARPC1B/RND3/CELSR1/BST2/CAPZB/ABI2/DBN1/SNX9/BAIAP2/TJP1/PAM/SPTBN1/DSG2/ARPC2/GSN/TPM1/ADD3/ATP2A2/FLNA/NCK1/CAPZA1/MYO1C/ARF1/FES/FLII/RHOC/LIMA1/SDC4/BAIAP2L1/CTTN/NCKAP1/SPTAN1/AKAP9/WASL/ARHGDIA/ICAM1/MDK/DSTN/F11R/PXN/RAC1/HIP1R/ARF6/RAC3/ARPC1A/AKAP1…	73
BP	GO:0007051	spindle organization	40/2365	182/18862	0.000252229	0.00354767	0.00273921	STMN1/TUBB/RAN/RAE1/LSM14A/VPS4B/RAB11A/HAUS6/NUDC/HSPA1A/DRG1/INTS13/SMC3/MISP/HAUS1/VCP/FBXO5/TTK/TPR/HNRNPU/NUP62/HDAC3/KIF2A/CLTC/MZT1/AURKA/FLNA/CCNB1/NUF2/NTMT1/EZR/CDC20/SBDS/TPX2/GOLGA2/CHMP1B/RMDN1/CHMP4C/CSNK1D/PTPA	40
BP	GO:0009394	2'-deoxyribonucleotide metabolic process	13/2365	36/18862	0.000256074	0.00359337	0.0027745	SAMHD1/TDG/ADA/UPP1/TBPL1/UNG/MBD4/TYMS/TYMP/DCTPP1/NTHL1/NT5C/SMUG1	13
BP	GO:0006278	RNA-dependent DNA biosynthetic process	21/2365	75/18862	0.000258215	0.00361216	0.002789	HSP90AB1/HSP90AA1/TCP1/XRCC5/CCT2/CCT4/HNRNPA1/CCT3/CCT7/CCT5/PTGES3/PKIB/DKC1/HNRNPC/CCT8/HNRNPU/RFC1/MAPK3/TNKS1BP1/NOP10/PPIA	21
BP	GO:1902807	negative regulation of cell cycle G1/S phase transition	30/2365	124/18862	0.00025861	0.00361216	0.002789	CDKN2A/MUC1/SOX4/TFDP2/CDK4/SFN/BCL2/PCNA/CDKN2B/BTG2/RPL26/PML/ZNF655/PRMT1/TP53/CNOT7/EZH2/BAX/AURKA/CDK2AP2/CNOT2/CDC73/CDK1/CCNB1/JADE1/ARID3A/TNKS1BP1/MDM4/CNOT11/CCND1	30
BP	GO:0090263	positive regulation of canonical Wnt signaling pathway	34/2365	147/18862	0.000262166	0.00365337	0.00282083	PSMB9/PSMB1/SOX4/PSMB8/PSMA4/PSMC4/PSMA7/CAV1/PSME2/PLEKHA4/PSME1/PSMD14/PSMA5/PSMB2/PSMA3/PSMD8/RUVBL1/VCP/PSMD1/PSMD7/RSPO3/PSMD4/PSMA1/PSMD11/GID8/YAP1/PSMC3/PSMD6/PSMD2/PSMD3/CSNK1E/XIAP/COL1A1/CSNK1D	34
BP	GO:0060828	regulation of canonical Wnt signaling pathway	57/2365	287/18862	0.000264016	0.00367068	0.00283419	PSMB9/PSMB1/SOX4/PSMB8/PSMA4/MAD2L2/SOX2/PSMC4/PSMA7/IGFBP2/IGFBP4/CAV1/PSME2/PLEKHA4/PSME1/PSMD14/PSMA5/SOX9/PSMB2/HDAC1/PSMA3/PSMD8/CTHRC1/RUVBL2/RUVBL1/CSNK1A1/VCP/MESP1/PSMD1/PSMD7/DDIT3/RSPO3/PSMD4/PSMA1/PSMD11/GID8/PPP1CA/YAP1/PSMC3/PSMD6/AMFR/PSMD2/PSMD3/CTNND1/EGR1/DVL1/CSNK1E/GNAQ/XIAP/JADE1/TLE1/COL1A1/PSEN1/MDK/IFT20/CSNK1D/CTNNB1	57
BP	GO:0036503	ERAD pathway	26/2365	102/18862	0.0002706	0.00375356	0.00289818	CAV1/UBXN4/FBXO2/VCP/SEC61B/NPLOC4/RCN3/MAN1B1/TMEM129/NFE2L2/AMFR/ERLEC1/TMEM259/UBE2J1/SELENOS/UBXN1/UBE2J2/RHBDD2/UBXN6/SEL1L/JKAMP/TMUB1/UFD1/BCAP31/HM13/HSPA5	26
BP	GO:0071479	cellular response to ionizing radiation	19/2365	65/18862	0.000273165	0.00378045	0.00291894	IFI16/XRCC5/RHOB/RPL26/NUCKS1/EEF1D/RAD1/TP53/KDM1A/RAD51AP1/ITGB6/YAP1/GTF2H5/NIPBL/NET1/SWI5/EGR1/TNKS1BP1/HSPA5	19
BP	GO:0055072	iron ion homeostasis	23/2365	86/18862	0.00028234	0.0038985	0.00301009	FTL/B2M/LTF/LCN2/SRI/EPAS1/STEAP1/SKP1/FXN/STEAP4/SOD1/PICALM/ATP6V1G1/MYC/HIF1A/SLC11A1/NCOA4/NEDD8/SLC40A1/ATP6V1A/HYAL2/SLC39A8/ATP6AP1	23
BP	GO:1902806	regulation of cell cycle G1/S phase transition	42/2365	195/18862	0.000283886	0.00391088	0.00301965	CDKN2A/MUC1/SOX4/TFDP2/CDK4/SFN/BCL2/ID2/PCNA/CDKN2B/BTG2/PSME2/RPL26/PSME1/RDX/PML/ZNF655/PRMT1/PHB2/TP53/PLCB1/CNOT7/APEX1/HYAL1/EZH2/PLRG1/AKT1/BAX/AURKA/CDK2AP2/CNOT2/CDC73/ANXA1/CDK1/CCNB1/JADE1/ARID3A/TNKS1BP1/MDM4/CNOT11/CCND1/CCND3	42
BP	GO:0002758	innate immune response-activating signal transduction	29/2365	119/18862	0.000284896	0.00391586	0.00302349	PSMB9/PSMB1/MUC1/PSMB8/PSMA4/MUCL1/PSMC4/PSMA7/PSME2/MUC4/PSME1/PSMD14/MUC16/PSMA5/HCK/PSMB2/PSMA3/PSMD8/SKP1/PSMD1/PSMD7/PSMD4/PSMA1/PSMD11/PSMC3/PSMD6/PSMD2/PSMD3/ICAM3	29
BP	GO:0006405	RNA export from nucleus	33/2365	142/18862	0.000292018	0.00400463	0.00309204	NPM1/EIF5A/SSB/HNRNPA1/SRRM1/RAN/SRSF3/RAE1/ALKBH5/CDC40/MAGOH/KHDRBS1/MAGOHB/SRSF7/SLU7/PHAX/TPR/SRSF2/CPSF6/NUP62/DDX39A/NCBP2/RBM8A/UPF2/SRSF4/HNRNPA2B1/SRSF11/NMD3/FYTTD1/AGFG1/THOC6/SEC13/SLBP	33
BP	GO:0071156	regulation of cell cycle arrest	27/2365	108/18862	0.000292926	0.00400798	0.00309462	HSP90AB1/MUC1/SOX4/TFDP2/CDK4/SFN/ID2/PCNA/BTG2/SLC25A33/RPL26/PML/PRMT1/TP53/CNOT7/SDE2/BAX/AURKA/CNOT2/CDK1/CCNB1/ARID3A/TNKS1BP1/MIF/MDM4/CNOT11/CCND1	27
BP	GO:0033574	response to testosterone	14/2365	41/18862	0.000294352	0.00400931	0.00309565	SPP1/CDK4/MTAP/NKX3-1/CA9/NASP/DUSP1/EDN1/GBA/NME1/NCOA4/TSPO/MSN/NQO1	14
BP	GO:0046596	regulation of viral entry into host cell	14/2365	41/18862	0.000294352	0.00400931	0.00309565	CD74/HLA-DRB1/LGALS9/TRIM22/IFITM3/LY6E/SNX3/P4HB/LGALS1/TMPRSS4/TRIM38/IFITM2/GSN/NECTIN2	14
BP	GO:0019081	viral translation	8/2365	16/18862	0.000304899	0.00414361	0.00319935	SSB/CSDE1/EIF3D/EIF3L/EIF3F/DENR/EIF3B/PCBP2	8
BP	GO:1903362	regulation of cellular protein catabolic process	51/2365	251/18862	0.000308575	0.00418414	0.00323064	RPL5/NUPR1/HSP90AB1/RPL11/HSP90AA1/RACK1/NOP53/PSMC4/CAV1/PSME2/RPS7/FURIN/PSME1/PSMD14/CD81/SDCBP/RDX/SMARCC1/ATP5IF1/DESI1/HSPA1A/PML/PTTG1IP/CSNK1A1/VCP/ATRAID/ANXA2/UFL1/PDCL3/GBA/WAC/NUB1/PSMC3/SUMO1/LAPTM4B/NFE2L2/CSNK2A1/AKT1/CLU/SMURF1/AURKA/TMEM259/UBXN1/DVL1/CSNK1E/EZR/CDC20/PSEN1/CSNK1D/MSN/BCAP31	51
BP	GO:0002223	stimulatory C-type lectin receptor signaling pathway	28/2365	114/18862	0.00031322	0.0042376	0.00327192	PSMB9/PSMB1/MUC1/PSMB8/PSMA4/MUCL1/PSMC4/PSMA7/PSME2/MUC4/PSME1/PSMD14/MUC16/PSMA5/PSMB2/PSMA3/PSMD8/SKP1/PSMD1/PSMD7/PSMD4/PSMA1/PSMD11/PSMC3/PSMD6/PSMD2/PSMD3/ICAM3	28
BP	GO:0051702	biological process involved in interaction with symbiont	24/2365	92/18862	0.000315899	0.00426428	0.00329252	IFI27/GAPDH/HSPD1/LTF/CAV2/SMARCB1/STOM/NUCKS1/POU2F3/JUN/HDAC1/TAF11/ANXA2/HSPA8/KRT6A/SMARCA4/HPN/PSMC3/SUGT1/ROMO1/APOL1/TUSC2/RAB9A/PPIB	24
BP	GO:0007595	lactation	15/2365	46/18862	0.000321245	0.00430753	0.00332591	CAV1/VEGFA/OAS2/SLC29A1/UMPS/NME1/PAM/HIF1A/NCOR2/APRT/ZBTB7B/GPAT4/DDR1/CCND1/XBP1	15
BP	GO:0070849	response to epidermal growth factor	15/2365	46/18862	0.000321245	0.00430753	0.00332591	EEF1A1/ERRFI1/SOX9/ID1/GSTP1/MCM7/PTPN12/ZFP36/TPR/ERBB2/AKT1/MAPK3/COL1A1/ZFP36L2/PTPN11	15
BP	GO:0072583	clathrin-dependent endocytosis	15/2365	46/18862	0.000321245	0.00430753	0.00332591	CLTA/AP2S1/FNBP1L/SMAP1/AP2M1/PICALM/CLTC/GAK/GPR107/CLTB/PIP5K1C/WASL/HIP1R/CANX/AP2A1	15
BP	GO:0000027	ribosomal large subunit assembly	11/2365	28/18862	0.000326115	0.00434388	0.00335398	RPL5/RPL11/RPL24/RPL10/BRIX1/RPF2/NOP53/RPL3/MRPL20/RPL38/MRTO4	11
BP	GO:1902175	regulation of oxidative stress-induced intrinsic apoptotic signaling pathway	11/2365	28/18862	0.000326115	0.00434388	0.00335398	HSPB1/PARP1/P4HB/SFPQ/TRAP1/SOD1/NFE2L2/AKT1/HIF1A/NOL3/PPIA	11
BP	GO:1902253	regulation of intrinsic apoptotic signaling pathway by p53 class mediator	11/2365	28/18862	0.000326115	0.00434388	0.00335398	CD74/RPL11/MUC1/BCL2/RPL26/RPS7/PTTG1IP/TP53/KDM1A/HNRNPK/MIF	11
BP	GO:0098586	cellular response to virus	20/2365	71/18862	0.000328735	0.00436914	0.00337348	IFI6/LGALS9/HSP90AA1/DDX58/IFIH1/NOP53/BIRC3/LSM14A/PHB2/C1QBP/NPLOC4/DDX60/LGALS8/BAX/HIF1A/ARF1/USP15/RIOK3/UFD1/TSPAN6	20
BP	GO:0034605	cellular response to heat	29/2365	120/18862	0.000331391	0.00439475	0.00339326	HSP90AB1/HDAC2/HSP90AA1/FKBP4/CXCL10/HSPH1/RAE1/DNAJC7/HSBP1/HSPA1A/PTGES3/SLU7/VCP/YWHAE/HSPA8/PDCL3/TPR/NUP62/SUMO1/DNAJB1/HSPA6/ATP2A2/DHX36/IER5/MAPKAPK2/CHORDC1/MAPK3/PDCD6/SEC13	29
BP	GO:0065002	intracellular protein transmembrane transport	16/2365	51/18862	0.000337642	0.00446783	0.00344968	HSPD1/PEX26/TRAM1/TOMM20/SEC61B/SEC61G/SEC63/TIMM17A/DNAJC15/TIMM17B/TIMM50/ROMO1/TOMM7/SEC62/SEC61A1/HSPA5	16
BP	GO:0009199	ribonucleoside triphosphate metabolic process	23/2365	87/18862	0.000338904	0.00447472	0.003455	ATP5F1C/PARP1/RAN/TMSB4X/ENO1/ATP5F1B/ATP5ME/AK3/ATP5PB/STOML2/ATP5MC3/CTPS1/ITPA/ATP5F1A/VCP/GNAI3/AK4/NME7/NME1/ALDOA/ATP6V1A/NME3/ATP5MG	23
BP	GO:0006244	pyrimidine nucleotide catabolic process	9/2365	20/18862	0.000344806	0.00452295	0.00349225	TDG/UPP1/UNG/MBD4/TYMP/DCTPP1/NTHL1/NT5C/SMUG1	9
BP	GO:0045056	transcytosis	9/2365	20/18862	0.000344806	0.00452295	0.00349225	RAB11A/FCGRT/MAL2/LRPAP1/PICALM/CLTC/IGF1R/USO1/RAB5A	9
BP	GO:0048025	negative regulation of mRNA splicing, via spliceosome	9/2365	20/18862	0.000344806	0.00452295	0.00349225	SRSF10/RBMX/SRSF7/HNRNPK/C1QBP/RBM42/SRSF4/HNRNPA2B1/SAP18	9
BP	GO:0090068	positive regulation of cell cycle process	59/2365	303/18862	0.000356933	0.00467187	0.00360722	NPM1/MUC1/SOX4/TFDP2/PLSCR1/CDK4/SFN/ID2/PBX1/PCNA/BTG2/CDC42/RPL26/VPS4B/RDX/RAB11A/PML/SFPQ/SVIL/PRMT1/PHIP/PHB2/TP53/FBXO5/RAD51AP1/PLCB1/CNOT7/APEX1/EDN1/CDC25B/HYAL1/EZH2/TPR/PLRG1/HNRNPU/NUP62/ANAPC11/AKT1/EREG/BAX/FEN1/AURKA/NIPBL/CNOT2/RAD21/CDC73/ANXA1/CDK1/CCNB1/RANBP1/TGFA/ARID3A/TNKS1BP1/MDM4/NUSAP1/CNOT11/CCND1/SMC5/CCND3	59
BP	GO:0034404	nucleobase-containing small molecule biosynthetic process	28/2365	115/18862	0.000365273	0.00477069	0.00368353	CDA/GMPS/MTAP/SAMHD1/TDG/ADA/NUDT5/UPP1/ITPA/CNP/VCP/UNG/SMPDL3A/UMPS/NME7/PRTFDC1/NME1/NT5E/MBD4/HINT1/TYMP/DCTPP1/APRT/NME3/NTHL1/TK1/NT5C/SMUG1	28
BP	GO:0006509	membrane protein ectodomain proteolysis	14/2365	42/18862	0.000391055	0.0050854	0.00392652	TIMP1/FURIN/ADAM9/RBMX/BACE2/TIMP2/DAG1/SNX9/ADAM8/NRDC/APH1A/PSEN1/NCSTN/SPPL2A	14
BP	GO:1901659	glycosyl compound biosynthetic process	14/2365	42/18862	0.000391055	0.0050854	0.00392652	CDA/GMPS/MTAP/ADA/UPP1/UMPS/NME7/PRTFDC1/NME1/NT5E/TYMP/APRT/NME3/TK1	14
BP	GO:0050657	nucleic acid transport	42/2365	198/18862	0.000398524	0.00515019	0.00397655	YBX1/NPM1/EIF5A/SSB/HNRNPA1/SRRM1/RAN/SRSF3/RAE1/ALKBH5/CDC40/MAGOH/KHDRBS1/MAGOHB/SRSF7/SFPQ/TOMM20/SLU7/PHAX/ZFP36/TPR/SRSF2/CPSF6/HNRNPU/NUP62/DDX39A/NCBP2/RBM8A/UPF2/TGFBR2/SRSF4/HNRNPA2B1/PNPT1/SRSF11/NMD3/MYO1C/FYTTD1/AGFG1/MVP/THOC6/SEC13/SLBP	42
BP	GO:0050658	RNA transport	42/2365	198/18862	0.000398524	0.00515019	0.00397655	YBX1/NPM1/EIF5A/SSB/HNRNPA1/SRRM1/RAN/SRSF3/RAE1/ALKBH5/CDC40/MAGOH/KHDRBS1/MAGOHB/SRSF7/SFPQ/TOMM20/SLU7/PHAX/ZFP36/TPR/SRSF2/CPSF6/HNRNPU/NUP62/DDX39A/NCBP2/RBM8A/UPF2/TGFBR2/SRSF4/HNRNPA2B1/PNPT1/SRSF11/NMD3/MYO1C/FYTTD1/AGFG1/MVP/THOC6/SEC13/SLBP	42
BP	GO:0045787	positive regulation of cell cycle	73/2365	395/18862	0.000399195	0.00515019	0.00397655	NUPR1/HSP90AB1/NPM1/MUC1/SOX4/TFDP2/PLSCR1/CDK4/TBX3/SFN/ID2/NKX3-1/PBX1/PCNA/EIF4EBP1/BTG2/CDC42/RPL26/CCDC57/VPS4B/PROX1/RDX/RAB11A/PML/SFPQ/SVIL/PRMT1/PHIP/PHB2/TP53/FBXO5/RAD51AP1/PLCB1/CNOT7/APEX1/EDN1/CDC25B/HYAL1/EZH2/TPR/PTK6/PLRG1/HNRNPU/NUP62/USP22/ANAPC11/AKT1/EREG/BAX/FEN1/AURKA/NIPBL/LGMN/CNOT2/HES1/RAD21/CDC73/ANXA1/CDK1/CCNB1/RANBP1/TGFA/ARID3A/TNKS1BP1/MIF/MDM4/NUSAP1/CNOT11/CCPG1…	73
BP	GO:0071214	cellular response to abiotic stimulus	63/2365	330/18862	0.000401023	0.00515019	0.00397655	IFI16/ERRFI1/NPM1/TIMP1/AQP5/PARP1/CASP8AP2/XRCC5/IRF1/RHOB/CRIP1/PTN/PCNA/RPL26/NUCKS1/OPN3/SLC2A1/SOX9/ERCC1/ARHGEF2/BNIP3/EEF1D/NOC2L/RAD1/BAK1/ITGA2/PIK3R1/METAP2/RUVBL2/TP53/KDM1A/RAD51AP1/MAPK8/HYAL1/ITGB6/CHP1/YBX3/SDE2/YAP1/DAG1/AKT1/BAX/MYC/GTF2H5/PIEZO1/NIPBL/NET1/DHX36/SIPA1/SWI5/EGR1/MAPK3/TNKS1BP1/COL1A1/HYAL2/F11R/MBIP/RAC1/TSPO/PTPN11/HSPA5/CNN2/TNFRSF1A	63
BP	GO:0104004	cellular response to environmental stimulus	63/2365	330/18862	0.000401023	0.00515019	0.00397655	IFI16/ERRFI1/NPM1/TIMP1/AQP5/PARP1/CASP8AP2/XRCC5/IRF1/RHOB/CRIP1/PTN/PCNA/RPL26/NUCKS1/OPN3/SLC2A1/SOX9/ERCC1/ARHGEF2/BNIP3/EEF1D/NOC2L/RAD1/BAK1/ITGA2/PIK3R1/METAP2/RUVBL2/TP53/KDM1A/RAD51AP1/MAPK8/HYAL1/ITGB6/CHP1/YBX3/SDE2/YAP1/DAG1/AKT1/BAX/MYC/GTF2H5/PIEZO1/NIPBL/NET1/DHX36/SIPA1/SWI5/EGR1/MAPK3/TNKS1BP1/COL1A1/HYAL2/F11R/MBIP/RAC1/TSPO/PTPN11/HSPA5/CNN2/TNFRSF1A	63
BP	GO:0050673	epithelial cell proliferation	78/2365	428/18862	0.000401159	0.00515019	0.00397655	STAT1/FABP7/NUPR1/ERRFI1/F3/EHF/IGFBP3/AREG/B2M/EGFL7/SFN/NFIB/SOX2/PTN/ID2/NKX3-1/IGFBP4/CDKN2B/CAV2/CAV1/CDC42/HMGB1/MYDGF/IFT74/PROX1/SIX1/PRKX/TGFBR1/SOX9/STRAP/ID1/ATP5IF1/LOXL2/VEGFA/CEACAM1/KLK8/KDM5B/ATP5F1A/ZNF580/IFT52/PHB2/PDCD10/KLF9/HYAL1/PDCL3/ZFP36/YAP1/NME1/HPN/ANG/LAMC1/CLDN1/SDR16C5/ERBB2/AKT1/EREG/BAX/MAGED1/MYC/EPHA2/HIF1A/CEBPB/HES1/CDC73/HMGB2/B4GALT1/WDR13/MMP14/TGFA/SERPIN…	78
BP	GO:0009303	rRNA transcription	12/2365	33/18862	0.000408727	0.00520308	0.00401738	NOP53/NIFK/SMARCB1/PWP1/POLR1E/NCL/TP53/GTF3C5/SMARCA4/ANG/GTF3C6/SIRT7	12
BP	GO:0032212	positive regulation of telomere maintenance via telomerase	12/2365	33/18862	0.000408727	0.00520308	0.00401738	TCP1/XRCC5/CCT2/CCT4/HNRNPA1/CCT3/CCT7/CCT5/PKIB/DKC1/CCT8/MAPK3	12
BP	GO:0050685	positive regulation of mRNA processing	12/2365	33/18862	0.000408727	0.00520308	0.00401738	RBMX/NCL/HSPA8/THRAP3/RBMXL1/PRPF19/NCBP2/SNRNP70/DHX36/TRA2B/CDC73/CCNB1	12
BP	GO:0051973	positive regulation of telomerase activity	12/2365	33/18862	0.000408727	0.00520308	0.00401738	HSP90AB1/HSP90AA1/TCP1/XRCC5/CCT2/CCT4/PTGES3/PKIB/DKC1/NVL/MYC/MAPK3	12
BP	GO:0031124	mRNA 3'-end processing	25/2365	99/18862	0.000410003	0.00520833	0.00402144	SRRM1/SRSF3/CDC40/MAGOH/MAGOHB/SRSF7/MTPAP/SLU7/BARD1/SNRPA/SRSF2/CPSF6/DDX39A/NCBP2/RBM8A/SRSF4/DHX36/PNPT1/SRSF11/CDC73/CCNB1/RNF20/AHCYL1/THOC6/SLBP	25
BP	GO:0007015	actin filament organization	79/2365	435/18862	0.000412427	0.00522812	0.00403671	STMN1/S100A10/TPM2/TACSTD2/MAD2L2/DPYSL3/MARCKSL1/RHOB/BCL2/TMSB4X/PLS3/CDC42/PROX1/MET/RDX/HCK/TGFBR1/MARCKS/ID1/ARPC5/ARHGEF2/RHOD/SVIL/RHOF/PIK3R1/ACTR3/CALD1/PDLIM1/ESPN/MYO1B/SSH3/ARPC1B/MYO6/RND3/ALDOA/CAPZB/ABI2/ANG/DBN1/SNX9/BAIAP2/TJP1/SPTBN1/ARPC2/GSN/ARHGAP12/SHROOM3/FAT1/TPM1/ADD3/FLNA/MSRB1/MYO1E/ABI1/NCK1/CAPZA1/MYO1C/ARF1/FLII/RHOC/LIMA1/SDC4/BAIAP2L1/EZR/CTTN/TPM4/NCKAP1/SPTAN1/WA…	79
BP	GO:0036498	IRE1-mediated unfolded protein response	19/2365	67/18862	0.00041835	0.00529209	0.0040861	AGR2/MYDGF/EXTL2/KLHDC3/BAK1/YIF1A/UFL1/VAPB/TPP1/BAX/SEC31A/KDELR3/SRPRA/HYOU1/SHC1/DNAJC3/LMNA/XBP1/HSPA5	19
BP	GO:0010256	endomembrane system organization	86/2365	482/18862	0.000424232	0.00535526	0.00413488	CXCR4/SRGN/PLSCR1/OPTN/SYNGR2/SNX3/ANXA6/CAV2/CAV1/CDC42/ABCA7/VPS4B/RAB11A/TMEM38B/PPP2R1A/TMED3/TRAM1/VPS28/ATL2/SQSTM1/SURF4/FNBP1L/TMED4/ESYT2/TBPL1/CSNK1A1/DTNBP1/YWHAZ/LPIN1/PDCD10/TLCD1/SPAG4/RAB18/GOLPH3L/MYOF/REEP6/RTN3/VAPB/TMED10/SCARB2/NPLOC4/RAB2A/DMKN/VTA1/SNX9/SOD1/LAPTM4B/BAIAP2/SEC16A/PPP2CA/TMED2/AKT1/CLU/SPTBN1/GSN/GAK/SEC31A/TMED1/ATP2A2/TMED9/CLCN3/CDK1/CCNB1/AP3D1/MAPK3/NECT…	86
BP	GO:0051851	modulation by host of symbiont process	18/2365	62/18862	0.000429804	0.00541428	0.00418045	IFI27/LTF/CAV2/SMARCB1/STOM/NUCKS1/POU2F3/JUN/HDAC1/TAF11/ANXA2/HSPA8/SMARCA4/HPN/PSMC3/SUGT1/RAB9A/PPIB	18
BP	GO:1900024	regulation of substrate adhesion-dependent cell spreading	17/2365	57/18862	0.000434876	0.00546676	0.00422097	GBP1/S100A10/FGB/FGG/FGA/TACSTD2/CDC42/P4HB/CIB1/C1QBP/ARPC2/DOCK5/FLNA/CRKL/MDK/RAC1/RAC3	17
BP	GO:1902903	regulation of supramolecular fiber organization	69/2365	370/18862	0.000437288	0.00548565	0.00423556	STMN1/S100A10/TACSTD2/FKBP4/TMSB4X/CDC42/PROX1/MET/RDX/HCK/TGFBR1/ID1/ARPC5/ARHGEF2/HSPA1A/PFDN1/SVIL/CIB1/DRG1/PIK3R1/ACTR3/EFEMP2/PFDN4/HSPA8/EDN1/VBP1/SSH3/ARPC1B/CAPZB/ABI2/MAP2/DBN1/SNX9/BAIAP2/TJP1/CLU/SPTBN1/ARPC2/GSN/TPM1/ADD3/FLNA/NCK1/CAPZA1/MYO1C/ARF1/FES/FLII/RHOC/LIMA1/SDC4/BAIAP2L1/CTTN/NCKAP1/SPTAN1/AKAP9/WASL/ICAM1/TPX2/PSEN1/DSTN/F11R/PXN/RAC1/HIP1R/ARF6/ARPC1A/CLIP1/AKAP13	69
BP	GO:0002683	negative regulation of immune system process	74/2365	403/18862	0.000444529	0.00556491	0.00429675	GBP1/IFI16/HLA-B/RPS19/CD74/HLA-DRB1/LGALS9/IDO1/LTF/IRF1/MAFB/SERPING1/PARP14/PHPT1/SAMHD1/ANGPT1/CD55/HMGB1/HLA-E/ADA/APOD/DUSP1/YTHDF2/LGALS3/SOX9/HSPA9/FSTL3/PRDX2/NBL1/GPR137B/SERPINB4/ZC3H8/NMI/CEACAM1/CD68/PIK3R1/SCGB1A1/CCL28/DDT/PLCB1/CNOT7/HMGB3/TAPBPL/PSMA1/C1QBP/NME1/NPLOC4/C4BPB/BST2/ERBB2/AKT1/MYC/HLA-F/CEBPB/TSC22D3/SELENOS/ANXA1/TMBIM6/SDC4/EZR/TNFRSF21/WASL/HLA-A/ZBTB7B/MIF/CD59/…	74
BP	GO:0051170	import into nucleus	36/2365	163/18862	0.000453762	0.00566873	0.00437692	HSP90AB1/SNRPE/HNRNPA1/SNRPD1/RAN/SNRPD2/ANGPT1/APOD/CSE1L/RBM22/SNRPF/PML/SNRPD3/PTTG1IP/PKIG/PIK3R1/PHB2/TP53/CDH1/KPNA3/CHP1/TPR/IPO9/NUP62/HDAC3/AKT1/SNRPG/RPAIN/FLNA/NOLC1/HTATIP2/TXNIP/HYAL2/PSEN1/NFKBIA/SEC13	36
BP	GO:0010634	positive regulation of epithelial cell migration	38/2365	175/18862	0.000456173	0.00568708	0.00439108	HSPB1/RHOB/TMSB4X/ANGPT1/HMGB1/ADAM9/ATP5F1B/PROX1/MET/RAB11A/SOX9/ITGA3/ITGA2/CIB1/VEGFA/ATP5F1A/ZNF580/EDN1/HYAL1/GPI/NFE2L2/AKT1/HIF1A/TGFBR2/DOCK5/AAMP/LGMN/P2RX4/RRAS/ANXA1/RAB25/MAP4K4/ANXA3/GRN/PDCD6/RAC1/ARF6/EMC10	38
BP	GO:0030970	retrograde protein transport, ER to cytosol	11/2365	29/18862	0.000466278	0.00576541	0.00445157	VCP/SEC61B/NPLOC4/TMEM129/ERLEC1/UBE2J1/SELENOS/SEL1L/UFD1/BCAP31/HM13	11
BP	GO:0050686	negative regulation of mRNA processing	11/2365	29/18862	0.000466278	0.00576541	0.00445157	SRSF10/RBMX/SRSF7/BARD1/HNRNPK/C1QBP/RBM42/SRSF4/HNRNPA2B1/RNF20/SAP18	11
BP	GO:1900101	regulation of endoplasmic reticulum unfolded protein response	11/2365	29/18862	0.000466278	0.00576541	0.00445157	AGR2/RACK1/ABCA7/BAK1/PIK3R1/UFL1/PPP1R15A/BAX/NCK1/XBP1/HSPA5	11
BP	GO:1903513	endoplasmic reticulum to cytosol transport	11/2365	29/18862	0.000466278	0.00576541	0.00445157	VCP/SEC61B/NPLOC4/TMEM129/ERLEC1/UBE2J1/SELENOS/SEL1L/UFD1/BCAP31/HM13	11
BP	GO:0019692	deoxyribose phosphate metabolic process	13/2365	38/18862	0.000471251	0.00581499	0.00448984	SAMHD1/TDG/ADA/UPP1/TBPL1/UNG/MBD4/TYMS/TYMP/DCTPP1/NTHL1/NT5C/SMUG1	13
BP	GO:0006302	double-strand break repair	53/2365	268/18862	0.000472735	0.0058214	0.0044948	PARP1/MAD2L2/XRCC5/PARP9/DEK/SAMHD1/HMGB1/NUCKS1/PSMD14/MSH2/ERCC1/CYREN/UBE2N/CGAS/MORF4L1/MMS22L/PML/SFPQ/CIB1/MCM6/DCLRE1C/TP53/GINS2/VCP/KDM1A/RAD51AP1/MCM7/BARD1/EYA3/MCM3/MCM2/MCM5/RNF168/HMCES/SUMO1/BABAM2/PRPF19/FEN1/NIPBL/RECQL/RIF1/SWI5/RAD21/KDM2A/PAXX/NABP2/HMGB2/NSD2/TNKS1BP1/PPP4C/SIRT7/SMC5/TDP2	53
BP	GO:0036473	cell death in response to oxidative stress	23/2365	89/18862	0.0004825	0.00591846	0.00456973	HSPB1/PARP1/BCL2/RACK1/P4HB/MET/PML/SFPQ/SLC7A11/ZNF622/TRAP1/PDCD10/STK24/SOD1/PDK1/NFE2L2/AKT1/HIF1A/PYCR1/ARL6IP5/NOL3/MELK/PPIA	23
BP	GO:0008630	intrinsic apoptotic signaling pathway in response to DNA damage	25/2365	100/18862	0.000482579	0.00591846	0.00456973	IFI16/NUPR1/CD74/MUC1/SFN/CRIP1/BCL2/RPL26/MSH2/PML/BAK1/PIK3R1/MSH6/TP53/KDM1A/HNRNPK/TOPORS/DDIT4/BAX/CLU/EPHA2/SHISA5/MIF/TPT1/TNFRSF1A	25
BP	GO:0000380	alternative mRNA splicing, via spliceosome	20/2365	73/18862	0.00048962	0.00596842	0.00460831	HNRNPA1/RBM17/RBMX/MAGOH/KHDRBS1/WTAP/HNRNPM/SFPQ/SLU7/KDM1A/FXR1/THRAP3/HNRNPU/PUF60/RBM8A/DDX5/TRA2B/CELF1/RSRC1/SAP18	20
BP	GO:0006283	transcription-coupled nucleotide-excision repair	20/2365	73/18862	0.00048962	0.00596842	0.00460831	RPS27A/PCNA/ERCC1/POLR2L/POLR2I/HMGN1/POLR2G/CCNH/LIG1/ISY1/POLD4/COPS3/RFC4/UVSSA/PRPF19/RFC1/GTF2H5/RFC3/COPS6/POLR2J	20
BP	GO:0031100	animal organ regeneration	20/2365	73/18862	0.00048962	0.00596842	0.00460831	NNMT/CDK4/PCNA/BAK1/UCP2/GSTP1/LPIN1/ATIC/EZH2/CLDN1/TYMS/UPF2/AURKA/TGFBR2/CEBPB/PRPS2/PNPT1/ADM/ANXA3/CCND1	20
BP	GO:0032956	regulation of actin cytoskeleton organization	66/2365	352/18862	0.000494483	0.00601555	0.0046447	STMN1/S100A10/TACSTD2/RHOB/TMSB4X/PHPT1/CDC42/PROX1/MET/RDX/HCK/TGFBR1/ID1/ARPC5/RHOD/SVIL/RHOF/PIK3R1/ACTR3/SMIM22/EDN1/SSH3/ARPC1B/RND3/CELSR1/BST2/CAPZB/ABI2/DBN1/SNX9/BAIAP2/TJP1/PAM/SPTBN1/ARPC2/GSN/TPM1/ADD3/FLNA/NCK1/CAPZA1/MYO1C/ARF1/FES/FLII/RHOC/LIMA1/SDC4/BAIAP2L1/CTTN/NCKAP1/SPTAN1/WASL/ARHGDIA/ICAM1/MDK/DSTN/F11R/PXN/RAC1/HIP1R/ARF6/RAC3/ARPC1A/AKAP13/CD2AP	66
BP	GO:0044106	cellular amine metabolic process	35/2365	158/18862	0.000509679	0.00618793	0.0047778	KYNU/PSMB9/PSMB1/IDO1/PSMB8/PSMA4/COMT/PSMC4/PSMA7/ALDH7A1/PSME2/PSME1/PSMD14/SAT1/PSMA5/EPAS1/PSMB2/ITGB2/PSMA3/OAZ2/PSMD8/SLC7A11/PSMD1/PSMD7/SMS/PSMD4/PSMA1/PSMD11/PSMC3/PSMD6/PSMD2/OAZ1/PSMD3/HNMT/NQO1	35
BP	GO:0043967	histone H4 acetylation	19/2365	68/18862	0.000513238	0.00619494	0.00478321	MUC1/SMARCB1/HAT1/MORF4L1/EPC1/ING4/MEAF6/NAA50/RUVBL2/RUVBL1/ACTL6A/CTBP1/ATG5/USP22/TAF7/PHF20/PER1/JADE1/MORF4L2	19
BP	GO:0021762	substantia nigra development	14/2365	43/18862	0.000513611	0.00619494	0.00478321	BASP1/COX6B1/CDC42/ATP5PB/YWHAQ/RAD1/CALM2/CNP/NDUFS3/CALM3/YWHAE/SEC16A/G6PD/HSPA5	14
BP	GO:0039529	RIG-I signaling pathway	10/2365	25/18862	0.00051375	0.00619494	0.00478321	DDX58/NOP53/BIRC3/LSM14A/PHB2/C1QBP/NPLOC4/DDX60/USP15/UFD1	10
BP	GO:0045732	positive regulation of protein catabolic process	46/2365	225/18862	0.000514467	0.00619494	0.00478321	NUPR1/HSP90AA1/RACK1/NOP53/PSMC4/CAV1/FURIN/ADAM9/CD81/RDX/SOX9/ATP5IF1/HSPA1A/VPS28/OAZ2/PTTG1IP/CSNK1A1/VCP/BARD1/GBA/LPCAT1/NUB1/C4BPB/PSMC3/SUMO1/SNX9/ADAM8/NRDC/NFE2L2/CSNK2A1/AKT1/CLU/WWP1/SMURF1/AURKA/OAZ1/TMEM259/DVL1/CSNK1E/EZR/CDC20/NEDD4L/PSEN1/CSNK1D/MSN/BCAP31	46
BP	GO:0006285	base-excision repair, AP site formation	6/2365	10/18862	0.000516416	0.00619494	0.00478321	TDG/UNG/MBD4/MPG/NTHL1/SMUG1	6
BP	GO:0009113	purine nucleobase biosynthetic process	6/2365	10/18862	0.000516416	0.00619494	0.00478321	SHMT1/GMPS/ADA/SHMT2/PAICS/APRT	6
BP	GO:0009142	nucleoside triphosphate biosynthetic process	22/2365	84/18862	0.000519912	0.00621217	0.00479652	ATP5F1C/PARP1/TMSB4X/ENO1/ATP5F1B/ATP5ME/AK3/ATP5PB/STOML2/ATP5MC3/CTPS1/ATP5F1A/TBPL1/VCP/AK4/NME7/NME1/ALDOA/TYMS/ATP6V1A/NME3/ATP5MG	22
BP	GO:1903313	positive regulation of mRNA metabolic process	22/2365	84/18862	0.000519912	0.00621217	0.00479652	BTG2/RBMX/YTHDF2/HNRNPR/NCL/CNOT7/HSPA8/THRAP3/POLR2G/RBMXL1/ZFP36/PRPF19/NCBP2/SNRNP70/DHX36/PNPT1/TRA2B/CDC73/CELF1/CCNB1/ZFP36L2/TOB1	22
BP	GO:0032527	protein exit from endoplasmic reticulum	15/2365	48/18862	0.000537912	0.00641455	0.00495277	INSIG1/CD81/VCP/SEC61B/NPLOC4/SEC16A/TMEM129/ERLEC1/UBE2J1/SELENOS/SEL1L/UFD1/BCAP31/HM13/SEC13	15
BP	GO:0031638	zymogen activation	17/2365	58/18862	0.000544222	0.00647699	0.00500099	IFI16/FGB/FGG/ASPH/FGA/CTSL/PLGRKT/FURIN/ENO1/PLAU/BAK1/HPN/C1R/LGMN/MMP14/RUNX1/PERP	17
BP	GO:0043280	positive regulation of cysteine-type endopeptidase activity involved in apoptotic process	31/2365	135/18862	0.000545761	0.00648253	0.00500526	F3/LGALS9/HSPD1/TNFSF10/HSPE1/CASP8AP2/FAM162A/PDCD2/RACK1/NKX3-1/PDCD5/HMGB1/FIS1/PML/BAK1/CTSD/DAPK1/S100A8/VCP/MTCH1/BAX/GSN/MYC/ARL6IP5/BCL2L13/TRADD/S100A9/PDCD6/HIP1R/EGLN3/BCAP31	31
BP	GO:0010332	response to gamma radiation	16/2365	53/18862	0.000547095	0.00648561	0.00500764	PARP1/XRCC5/CXCL10/BCL2/RPL26/PML/BAK1/TP53/KDM1A/YAP1/BAX/PRKAA1/MYC/GTF2H5/EGR1/HSPA5	16
BP	GO:0051236	establishment of RNA localization	42/2365	201/18862	0.000552818	0.0065406	0.0050501	YBX1/NPM1/EIF5A/SSB/HNRNPA1/SRRM1/RAN/SRSF3/RAE1/ALKBH5/CDC40/MAGOH/KHDRBS1/MAGOHB/SRSF7/SFPQ/TOMM20/SLU7/PHAX/ZFP36/TPR/SRSF2/CPSF6/HNRNPU/NUP62/DDX39A/NCBP2/RBM8A/UPF2/TGFBR2/SRSF4/HNRNPA2B1/PNPT1/SRSF11/NMD3/MYO1C/FYTTD1/AGFG1/MVP/THOC6/SEC13/SLBP	42
BP	GO:0032204	regulation of telomere maintenance	21/2365	79/18862	0.00055711	0.00657847	0.00507934	TCP1/PARP1/XRCC5/CCT2/CCT4/HNRNPA1/CCT3/CCT7/CCT5/ERCC1/PML/PKIB/DKC1/HNRNPC/CCT8/HNRNPU/MYC/HNRNPA2B1/DHX36/NABP2/MAPK3	21
BP	GO:0002285	lymphocyte activation involved in immune response	40/2365	189/18862	0.000566671	0.0066783	0.00515642	HLA-DRA/RPS6/CD74/HLA-DRB1/LGALS9/HSPD1/MAD2L2/MYB/HMGB1/ADA/EXOSC3/CD81/MSH2/LGALS3/ERCC1/HLA-DMB/CEACAM1/MSH6/TP53/LGALS1/UNG/TMEM98/LAMP1/RNF168/HMCES/BATF/CLCF1/RORC/HLA-F/SLC11A1/RIF1/ANXA1/NSD2/ZBTB7B/ICAM1/PSEN1/MDK/IL27RA/XBP1/CD46	40
BP	GO:0002220	innate immune response activating cell surface receptor signaling pathway	28/2365	118/18862	0.000570053	0.00669202	0.00516701	PSMB9/PSMB1/MUC1/PSMB8/PSMA4/MUCL1/PSMC4/PSMA7/PSME2/MUC4/PSME1/PSMD14/MUC16/PSMA5/PSMB2/PSMA3/PSMD8/SKP1/PSMD1/PSMD7/PSMD4/PSMA1/PSMD11/PSMC3/PSMD6/PSMD2/PSMD3/ICAM3	28
BP	GO:0042752	regulation of circadian rhythm	28/2365	118/18862	0.000570053	0.00669202	0.00516701	ID2/PPP1CC/PTGDS/ADA/OPN3/PROX1/PML/SFPQ/TP53/NR2F6/THRAP3/MAPK8/EZH2/PPP1CA/PPP1CB/SUV39H2/HDAC3/RORC/PRKAA1/PER1/BHLHE40/KDM2A/CDK1/CSNK1E/GNAQ/CSNK1D/TOP2A/NMU	28
BP	GO:0007093	mitotic cell cycle checkpoint	35/2365	159/18862	0.000576165	0.00675064	0.00521228	MUC1/SOX4/MAD2L2/TFDP2/SFN/IK/NOP53/PCNA/BTG2/RPL26/DUSP1/NAE1/MSH2/PML/BUB3/PRMT1/TP53/CNOT7/SYF2/TTK/TPR/BAX/AURKA/CENPF/CNOT2/CDK1/CCNB1/NABP2/ARID3A/TNKS1BP1/CDC20/MDM4/CNOT11/CHMP4C/CCND1	35
BP	GO:0038093	Fc receptor signaling pathway	48/2365	239/18862	0.000598006	0.00699296	0.00539937	PSMB9/HSP90AB1/PSMB1/HSP90AA1/PSMB8/PSMA4/PSMC4/PSMA7/CDC42/PSME2/PSME1/PSMD14/PSMA5/HCK/JUN/PSMB2/ARPC5/PSMA3/PSMD8/SKP1/PIK3R1/ACTR3/PSMD1/PSMD7/MAPK8/PSMD4/PSMA1/PSMD11/ARPC1B/PSMC3/BAIAP2/PSMD6/ARPC2/VAV2/PSMD2/IGHG4/ABI1/IGKC/NCK1/PSMD3/MYO1C/MAPK3/SHC1/NCKAP1/WASL/RAC1/IGLC2/ARPC1A	48
BP	GO:0042110	T cell activation	84/2365	474/18862	0.000610525	0.00712555	0.00550175	HLA-DRA/RPS6/CD74/HLA-DRB1/HLA-DPA1/LGALS9/HLA-DPB1/HSPD1/SOX4/IDO1/CTSL/B2M/IRF1/MAFB/MYB/BCL2/CD151/HSPH1/IGFBP2/CD7/CAV1/CDC42/CD55/HMGB1/HLA-E/ADA/RPL22/CD81/STOML2/CD24/LGALS3/CGAS/HLA-DMB/PRDX2/ZC3H8/CTPS1/CEACAM1/PIK3R1/SCGB1A1/TP53/LGALS1/MAP3K8/TMEM98/GBA/ATG5/BATF/SOD1/ADAM8/TCIRG1/RORC/ERBB2/AKT1/BAX/GSN/SLC11A1/TGFBR2/CEBPB/FZD5/CXADR/HES1/NCK1/ANXA1/AP3D1/EGR1/FLOT2/SDC4/IL6ST/TNFRSF…	84
BP	GO:0042769	DNA damage response, detection of DNA damage	13/2365	39/18862	0.00062654	0.00729835	0.00563517	DNAJA1/RPS27A/SOX4/PARP1/PCNA/MRPS35/USP1/MRPS9/MRPS26/POLD4/RFC4/RFC1/RFC3	13
BP	GO:0043467	regulation of generation of precursor metabolites and energy	35/2365	160/18862	0.0006502	0.00755936	0.0058367	NUPR1/NOP53/RAE1/SLC25A33/HMGB1/OPN3/COX7A2/BNIP3/PHB2/TP53/VCP/TRAP1/SHMT2/AK4/CHCHD2/DNAJC15/TPR/IRS1/PPP1CA/PPP1CB/NUP62/DDIT4/COX7A2L/AKT1/PRKAA1/HIF1A/PNPT1/SELENOS/CDK1/CISD1/CCNB1/IRS2/PHLDA2/PSEN1/SEC13	35
BP	GO:0001844	protein insertion into mitochondrial membrane involved in apoptotic signaling pathway	11/2365	30/18862	0.000653471	0.00756822	0.00584354	TFDP2/SFN/BCL2/YWHAB/YWHAQ/TP53/YWHAZ/YWHAE/MAPK8/BAX/YWHAG	11
BP	GO:0070198	protein localization to chromosome, telomeric region	11/2365	30/18862	0.000653471	0.00756822	0.00584354	TCP1/XRCC5/CCT2/CCT4/CCT3/CCT7/CCT5/DKC1/TPP1/CCT8/NABP2	11
BP	GO:0044786	cell cycle DNA replication	18/2365	64/18862	0.000654752	0.00756853	0.00584378	PCNA/RTF2/PRIM1/MCM6/ORC3/FBXO5/MCM7/POLE4/MCM3/LIG1/MCM2/MCM5/POLD4/POLE3/RFC4/RFC1/FEN1/RFC3	18
BP	GO:0000075	cell cycle checkpoint	43/2365	209/18862	0.000670663	0.00773763	0.00597434	MUC1/SOX4/MAD2L2/TFDP2/SFN/IK/NOP53/PCNA/BTG2/RPL26/CDC5L/PROX1/DUSP1/NAE1/MSH2/RAD1/PML/BUB3/PRMT1/TP53/CNOT7/SYF2/TTK/TPR/WAC/BABAM2/PRPF19/BAX/AURKA/CENPF/TIPRL/CNOT2/CDK1/CCNB1/NABP2/ARID3A/TNKS1BP1/CDC20/MDM4/CNOT11/CHMP4C/PTPN11/CCND1	43
BP	GO:0033260	nuclear DNA replication	17/2365	59/18862	0.000676368	0.00777591	0.0060039	PCNA/RTF2/PRIM1/MCM6/ORC3/MCM7/POLE4/MCM3/LIG1/MCM2/MCM5/POLD4/POLE3/RFC4/RFC1/FEN1/RFC3	17
BP	GO:0034502	protein localization to chromosome	23/2365	91/18862	0.000676558	0.00777591	0.0060039	TCP1/XRCC5/CCT2/CCT4/CCT3/IK/CCT7/MSH2/CCT5/BUB3/BOD1/DKC1/RUVBL2/VCP/TTK/EZH2/TPP1/CCT8/NIPBL/RAD21/CDK1/NABP2/SMC5	23
BP	GO:1902905	positive regulation of supramolecular fiber organization	42/2365	203/18862	0.000683193	0.00783724	0.00605125	S100A10/CDC42/PROX1/MET/HCK/TGFBR1/ID1/ARPC5/HSPA1A/DRG1/ACTR3/EFEMP2/EDN1/ARPC1B/ABI2/SNX9/BAIAP2/CLU/ARPC2/GSN/TPM1/FLNA/NCK1/MYO1C/ARF1/FES/RHOC/SDC4/BAIAP2L1/CTTN/NCKAP1/AKAP9/WASL/ICAM1/PSEN1/DSTN/PXN/RAC1/HIP1R/ARF6/ARPC1A/CLIP1	42
BP	GO:0002381	immunoglobulin production involved in immunoglobulin-mediated immune response	16/2365	54/18862	0.000688098	0.00787853	0.00608314	HLA-DRB1/HSPD1/MAD2L2/EXOSC3/MSH2/ERCC1/HLA-DQB1/MSH6/UNG/RNF168/HMCES/BATF/CLCF1/RIF1/NSD2/IL27RA	16
BP	GO:0071166	ribonucleoprotein complex localization	30/2365	131/18862	0.00069708	0.00796625	0.00615087	NPM1/EIF5A/SSB/SRRM1/RAN/SRSF3/RAE1/ALKBH5/CDC40/MAGOH/PRPF31/MAGOHB/SRSF7/SLU7/TPR/SRSF2/NUP62/DDX39A/NCBP2/RBM8A/UPF2/SRSF4/HNRNPA2B1/SRSF11/NMD3/FYTTD1/AGFG1/THOC6/SEC13/SLBP	30
BP	GO:0009408	response to heat	35/2365	161/18862	0.000732501	0.00835521	0.00645119	PSIP1/DNAJA1/HSP90AB1/HDAC2/HSP90AA1/FKBP4/CXCL10/HSPH1/RAE1/GCLC/DNAJC7/HSBP1/HSPA1A/PTGES3/SLU7/VCP/YWHAE/HSPA8/EIF2B3/PDCL3/TPR/NUP62/SUMO1/SOD1/DNAJB1/AKT1/HSPA6/ATP2A2/DHX36/IER5/MAPKAPK2/CHORDC1/MAPK3/PDCD6/SEC13	35
BP	GO:0032799	low-density lipoprotein receptor particle metabolic process	7/2365	14/18862	0.000740919	0.00839625	0.00648288	CLTA/FURIN/AP2S1/ANXA2/AP2M1/CLTC/AP2A1	7
BP	GO:0032802	low-density lipoprotein particle receptor catabolic process	7/2365	14/18862	0.000740919	0.00839625	0.00648288	CLTA/FURIN/AP2S1/ANXA2/AP2M1/CLTC/AP2A1	7
BP	GO:1900739	regulation of protein insertion into mitochondrial membrane involved in apoptotic signaling pathway	10/2365	26/18862	0.000741692	0.00839625	0.00648288	TFDP2/SFN/BCL2/YWHAB/YWHAQ/TP53/YWHAZ/YWHAE/MAPK8/YWHAG	10
BP	GO:1900740	positive regulation of protein insertion into mitochondrial membrane involved in apoptotic signaling pathway	10/2365	26/18862	0.000741692	0.00839625	0.00648288	TFDP2/SFN/BCL2/YWHAB/YWHAQ/TP53/YWHAZ/YWHAE/MAPK8/YWHAG	10
BP	GO:0010001	glial cell differentiation	43/2365	210/18862	0.000743056	0.00839625	0.00648288	PHGDH/CXCR4/HDAC2/SOX4/MXRA8/NFIB/SOX2/PTN/SOX9/SPINT1/BNIP3/HDAC1/BACE2/GSTP1/S100A8/CNP/ITGB4/TMEM98/EIF2B3/GBA/DAG1/SOD1/PRPF19/CLCF1/ERBB2/AKT1/CLU/METRN/GSN/HES1/CDK1/MAPK3/FA2H/IL6ST/TNFRSF21/NDRG1/PSEN1/MDK/NCSTN/GRN/S100A9/ERBB3/PTPN11	43
BP	GO:0010765	positive regulation of sodium ion transport	12/2365	35/18862	0.000756156	0.00852831	0.00658485	TESC/KIF5B/ATP1B3/PRSS8/CHP1/FGF12/AKT1/GLRX/ARF1/AHCYL1/ATP1B1/MLLT6	12
BP	GO:0006310	DNA recombination	57/2365	299/18862	0.000763798	0.00859842	0.00663898	HSPD1/PARP1/MAD2L2/XRCC5/TSN/SAMHD1/HMGB1/TFPT/NUCKS1/PSMD14/EXOSC3/MSH2/ERCC1/KLHDC3/UBE2N/CGAS/MORF4L1/MMS22L/SFPQ/MCM6/MSH6/DCLRE1C/RUVBL2/RUVBL1/GINS2/KDM1A/UNG/RAD51AP1/MCM7/ACTL6A/HMGB3/APEX1/CCNB1IP1/TPRKB/MCM3/MCM2/MCM5/RNF168/HMCES/BATF/KIN/CLCF1/FEN1/NIPBL/RPAIN/RECQL/RIF1/SWI5/RAD21/NABP2/HMGB2/NSD2/CENPX/PPP4C/TOP2A/IL27RA/SMC5	57
BP	GO:1901293	nucleoside phosphate biosynthetic process	52/2365	267/18862	0.000768481	0.00863503	0.00666724	KYNU/IDH2/IDO1/ATP5F1C/PARP1/GMPS/AK2/PARP9/NNMT/TMSB4X/ENO1/ATP5F1B/ADA/ATP5ME/AK3/ATP5PB/STOML2/ATP5MC3/UPP1/NAMPT/PRPSAP2/RRM1/CTPS1/ATP5F1A/TBPL1/VCP/SLC25A1/UMPS/AK4/NME7/ATIC/MTHFD1/PAPSS1/NME1/NMRK1/ALDOA/PDK1/PAICS/PDHX/TYMS/RFK/PRPS2/HSD17B8/SCD/ATP6V1A/ELOVL1/APRT/NME3/ATP5MG/TK1/SLC35B2/RRM2	52
BP	GO:2001237	negative regulation of extrinsic apoptotic signaling pathway	25/2365	103/18862	0.000771962	0.00865802	0.006685	IFI6/FGB/FGG/FGA/TNFSF10/BCL2/EYA2/TGFBR1/LGALS3/ARHGEF2/HSPA1A/PRDX2/PHIP/GSTP1/EYA3/ITGAV/TMBIM1/YAP1/AKT1/GCLM/NOL3/HMGB2/TRADD/CTTN/ICAM1	25
BP	GO:0001824	blastocyst development	23/2365	92/18862	0.000796778	0.00891978	0.0068871	C6orf141/FURIN/NASP/ADA/ELF3/TGFBR1/HOPX/TTLL4/PTPN18/ACTL6A/SMIM14/YAP1/RPL7L1/PRPF19/BYSL/NDUFA2/CNOT2/SBDS/JUNB/UBE2A/DAD1/CAPN2/RRP7A	23
BP	GO:0051235	maintenance of location	60/2365	319/18862	0.000800822	0.00892483	0.006891	S100A7/FTL/ERO1A/SRGN/LCN2/CXCL10/SRI/ANXA6/LPL/TMSB4X/YWHAB/CAV1/PLIN2/CES1/TTC39B/INSIG1/CHCHD10/TMEM38B/C3/CXCL11/NBL1/PML/SKP1/S100A8/CALM2/SP100/BARD1/SMIM22/CALM3/DDIT3/TOPORS/ITGAV/ARL2BP/GBA/P2RY6/HNRNPU/ATG5/DBN1/KDELR2/AKT1/BAX/GSN/CDS1/KDELR3/FLNA/SQLE/NOL3/AP3D1/PNPLA2/AKAP9/PSEN1/S100A9/NFKBIA/TSPO/RER1/HILPDA/GPAA1/GOLPH3/PLIN3/HSPA5	60
BP	GO:0032069	regulation of nuclease activity	9/2365	22/18862	0.000807583	0.00892483	0.006891	NPM1/PCNA/HMGB1/HSPA1A/OAS2/OAS1/AKT1/HMGB2/TMBIM6	9
BP	GO:0042451	purine nucleoside biosynthetic process	9/2365	22/18862	0.000807583	0.00892483	0.006891	GMPS/MTAP/ADA/NME7/PRTFDC1/NME1/NT5E/APRT/NME3	9
BP	GO:0042455	ribonucleoside biosynthetic process	9/2365	22/18862	0.000807583	0.00892483	0.006891	GMPS/MTAP/ADA/NME7/PRTFDC1/NME1/NT5E/APRT/NME3	9
BP	GO:0043457	regulation of cellular respiration	9/2365	22/18862	0.000807583	0.00892483	0.006891	NOP53/OPN3/BNIP3/VCP/TRAP1/SHMT2/HIF1A/PNPT1/CISD1	9
BP	GO:0046129	purine ribonucleoside biosynthetic process	9/2365	22/18862	0.000807583	0.00892483	0.006891	GMPS/MTAP/ADA/NME7/PRTFDC1/NME1/NT5E/APRT/NME3	9
BP	GO:0051131	chaperone-mediated protein complex assembly	9/2365	22/18862	0.000807583	0.00892483	0.006891	HSP90AB1/HSPD1/HSP90AA1/CCT2/HSPA4/HOPX/HSPA1A/PTGES3/CLU	9
BP	GO:0031330	negative regulation of cellular catabolic process	50/2365	255/18862	0.000820523	0.00904351	0.00698264	YBX1/RPL5/NUPR1/HSP90AB1/RPL11/TIMP1/PAIP1/CST3/BCL2/NOP53/RPS7/FURIN/QSOX1/HNRNPA0/RRAGA/MET/SDCBP/SYNCRIP/SMARCC1/PML/DKC1/ZCCHC17/TP53/ATRAID/TIMP2/HNRNPC/ANXA2/THRAP3/YBX3/PDCL3/ZFP36/WAC/APOC1/HNRNPU/LAPTM4B/PKP3/CSNK2A1/AKT1/SLC11A1/SNRNP70/DHX36/UBXN1/MAPKAPK2/TAF15/CTSA/GOLGA2/PSEN1/TOB1/TSPO/SECISBP2	50
BP	GO:0046112	nucleobase biosynthetic process	8/2365	18/18862	0.000821919	0.00904351	0.00698264	SHMT1/GMPS/ADA/CTPS1/SHMT2/UMPS/PAICS/APRT	8
BP	GO:0072529	pyrimidine-containing compound catabolic process	13/2365	40/18862	0.000822819	0.00904351	0.00698264	CDA/TDG/NT5C3A/UPP1/UNG/APOBEC3G/NT5E/MBD4/TYMP/DCTPP1/NTHL1/NT5C/SMUG1	13
BP	GO:1904356	regulation of telomere maintenance via telomere lengthening	17/2365	60/18862	0.000835043	0.00916118	0.00707349	TCP1/PARP1/XRCC5/CCT2/CCT4/HNRNPA1/CCT3/CCT7/CCT5/PKIB/DKC1/HNRNPC/CCT8/HNRNPU/HNRNPA2B1/DHX36/MAPK3	17
BP	GO:0072593	reactive oxygen species metabolic process	54/2365	281/18862	0.000853526	0.00934696	0.00721693	IFI6/HSP90AB1/HSP90AA1/AKR1C3/BCL2/GCHFR/CAV1/SLC25A33/ITGB2/ATP5IF1/BNIP3/PRDX2/GPX3/GSTP1/VDAC1/TP53/GNAI3/TRAP1/NDUFS3/PRCP/EDN1/CYB5R4/NDUFS1/ATG5/SOD1/NFE2L2/DDIT4/AKT1/CLU/GLA/HIF1A/TGFBR2/INAVA/ROMO1/DDAH2/RFK/HBB/PRDX5/ARF4/PRDX1/P2RX4/SELENOS/CLCN3/CYBA/PRDX4/IMMP2L/ICAM1/TUSC2/RAC1/TSPO/G6PD/NQO1/SLC5A3/NQO2	54
BP	GO:0051258	protein polymerization	56/2365	294/18862	0.000862511	0.00942825	0.0072797	STMN1/MX1/GPX4/FGB/FGG/FGA/HSP90AA1/FKBP4/TMSB4X/CCDC57/MET/RDX/HCK/ARPC5/HSPA1A/SVIL/DRG1/ACTR3/FBXO5/SSH3/ARPC1B/CAPZB/ABI2/ANG/MAP2/UBE2S/DBN1/SNX9/BAIAP2/MZT1/SPTBN1/ARPC2/GSN/ADD3/MSRB1/NCK1/CAPZA1/MYO1C/ARF1/FES/FLII/BAIAP2L1/CTTN/NCKAP1/SPTAN1/AKAP9/WASL/ICAM1/TPX2/GOLGA2/RAC1/HIP1R/ARF6/CSNK1D/ARPC1A/CLIP1	56
BP	GO:0051648	vesicle localization	45/2365	224/18862	0.000864776	0.00943591	0.00728562	MX1/AREG/KIF1A/SERPINA1/KIF5B/RAB11A/MLPH/KIFAP3/FNBP1L/DTNBP1/MYO1B/CHP1/PEF1/TMED10/MYO6/TANC2/SEC24D/MAP2/SEC16A/TCIRG1/PICALM/TMED2/SEC31A/MYO1E/SEC23A/TMED9/MYO1C/AP3D1/ARF1/YKT6/TGFA/SNAP29/STARD3NL/WASL/CD59/GOLGA2/TRAPPC4/PSEN1/BET1/LMAN1/PDCD6/CSNK1D/USO1/RAB1B/SEC13	45
BP	GO:0010811	positive regulation of cell-substrate adhesion	28/2365	121/18862	0.00086933	0.00945759	0.00730236	S100A10/FGB/AGR2/FGG/FGA/PTN/CDC42/P4HB/CEACAM6/ITGA3/RSU1/CIB1/VEGFA/CCL28/EFEMP2/NDNF/C1QBP/DAG1/ARPC2/DOCK5/FLNA/CRKL/RRAS/SDC4/MAP4K4/MDK/RAC1/RAC3	28
BP	GO:0006890	retrograde vesicle-mediated transport, Golgi to endoplasmic reticulum	22/2365	87/18862	0.000869898	0.00945759	0.00730236	RAB6B/TMED3/KIFAP3/SURF4/GOLPH3L/PITPNB/TMED10/ARF5/KDELR2/KIF2A/TMED2/ERGIC2/KDELR3/ARF4/COPB2/KIF2C/TMED9/BET1L/COPZ1/RER1/RAB1B/GOLPH3	22
BP	GO:0007159	leukocyte cell-cell adhesion	67/2365	366/18862	0.000876566	0.00951295	0.0073451	HLA-DRA/CD74/HLA-DRB1/HLA-DPA1/LGALS9/HLA-DPB1/HSPD1/SOX4/IDO1/IRF1/MYB/HSPH1/IGFBP2/CAV1/CDC42/CD55/HMGB1/PODXL2/HLA-E/ADA/CD81/CD24/LGALS3/ITGB2/HLA-DMB/PRDX2/ZC3H8/CEACAM1/PIK3R1/SCGB1A1/CCL28/S100A8/LGALS1/MAP3K8/TNIP1/NT5E/ADAM8/ERBB2/AKT1/TGFBR2/CEBPB/ST3GAL4/HES1/NCK1/ANXA1/AP3D1/FLOT2/SDC4/EZR/IL6ST/TNFRSF21/HLA-A/ZBTB7B/ICAM1/MDK/SLC39A8/S100A9/F11R/SELENOK/RAC1/RUNX1/IL27RA/MSN/PTPN11/G…	67
BP	GO:0043254	regulation of protein-containing complex assembly	79/2365	446/18862	0.000884829	0.00958538	0.00740103	STMN1/RPL13A/GBP5/HSP90AA1/PARP1/FKBP4/EIF2AK2/RACK1/NOP53/PSMC4/TMSB4X/EIF4EBP1/CDC42/HMGB1/MET/RDX/HCK/LGALS3/SOX9/ERCC1/ARPC5/HSPA1A/BAK1/SVIL/VEGFA/FBLIM1/DRG1/ACTR3/TP53/VCP/HSPA8/LMO4/TMC8/SSH3/DNAJC15/GBA/ARPC1B/PSMC3/SUMO1/CAPZB/ABI2/MAP2/DBN1/SNX9/BAIAP2/BAX/CLU/SPTBN1/ARPC2/GSN/GTF2H5/PIEZO1/STMP1/ADD3/CLDN7/NCK1/CAPZA1/MYO1C/ARF1/FES/FLII/RHOC/BAIAP2L1/CTTN/NCKAP1/SPTAN1/AKAP9/WASL/ICA…	79
BP	GO:0002821	positive regulation of adaptive immune response	25/2365	104/18862	0.000897303	0.00968573	0.00747851	HLA-B/HLA-DRA/AZGP1/HLA-DRB1/HSPD1/MAD2L2/B2M/HLA-E/ADA/EXOSC3/CD81/MSH2/C3/HMCES/CLCF1/HLA-F/SLC11A1/PVR/FZD5/RIF1/NECTIN2/NSD2/IL6ST/HLA-A/IL27RA	25
BP	GO:0009116	nucleoside metabolic process	25/2365	104/18862	0.000897303	0.00968573	0.00747851	CDA/GMPS/MTAP/RAN/ADA/AK3/AHCY/NT5C3A/UPP1/PRPSAP2/GNAI3/UMPS/AK4/NME7/APOBEC3G/PRTFDC1/ATIC/NME1/NT5E/TYMP/PRPS2/APRT/NME3/TK1/NT5C	25
BP	GO:0035456	response to interferon-beta	11/2365	31/18862	0.000899161	0.00968846	0.00748061	IFI16/STAT1/IFITM3/IRF1/PLSCR1/XAF1/BST2/IFITM2/CDC34/PNPT1/CAPN2	11
BP	GO:0055076	transition metal ion homeostasis	31/2365	139/18862	0.000918091	0.00987479	0.00762449	FTL/B2M/LTF/LCN2/MT1E/SRI/EPAS1/MT1M/STEAP1/SKP1/FXN/S100A8/STEAP4/TMC8/SOD1/PICALM/ATP6V1G1/MYC/HIF1A/SLC11A1/NCOA4/NEDD8/AP3D1/ARF1/XIAP/SLC40A1/ATP6V1A/HYAL2/SLC39A8/S100A9/ATP6AP1	31
BP	GO:0009308	amine metabolic process	35/2365	163/18862	0.000925027	0.00993169	0.00766842	KYNU/PSMB9/PSMB1/IDO1/PSMB8/PSMA4/COMT/PSMC4/PSMA7/ALDH7A1/PSME2/PSME1/PSMD14/SAT1/PSMA5/EPAS1/PSMB2/ITGB2/PSMA3/OAZ2/PSMD8/SLC7A11/PSMD1/PSMD7/SMS/PSMD4/PSMA1/PSMD11/PSMC3/PSMD6/PSMD2/OAZ1/PSMD3/HNMT/NQO1	35
BP	GO:0071158	positive regulation of cell cycle arrest	21/2365	82/18862	0.000946001	0.0101388	0.00782837	MUC1/SOX4/TFDP2/SFN/ID2/PCNA/BTG2/RPL26/PML/PRMT1/TP53/CNOT7/BAX/AURKA/CNOT2/CDK1/CCNB1/ARID3A/TNKS1BP1/MDM4/CNOT11	21
BP	GO:0030193	regulation of blood coagulation	18/2365	66/18862	0.000974079	0.0104213	0.00804642	FGB/F3/FGG/FGA/TFPI/SERPING1/CD9/CAV1/TSPAN8/PLAU/PRDX2/CEACAM1/PROS1/EDN1/NFE2L2/ST3GAL4/VKORC1/PLAUR	18
BP	GO:0002824	positive regulation of adaptive immune response based on somatic recombination of immune receptors built from immunoglobulin superfamily domains	24/2365	99/18862	0.000991695	0.010591	0.00817744	HLA-B/HLA-DRA/AZGP1/HLA-DRB1/HSPD1/MAD2L2/B2M/HLA-E/ADA/EXOSC3/CD81/MSH2/C3/HMCES/CLCF1/HLA-F/SLC11A1/PVR/FZD5/RIF1/NECTIN2/NSD2/HLA-A/IL27RA	24
BP	GO:0043129	surfactant homeostasis	6/2365	11/18862	0.00101552	0.0107881	0.0083297	EPAS1/VEGFA/ITGB6/LPCAT1/NAPSA/RCN3	6
BP	GO:0043589	skin morphogenesis	6/2365	11/18862	0.00101552	0.0107881	0.0083297	ERRFI1/ITGA2/ITGB4/GBA/COL1A1/PSEN1	6
BP	GO:0060009	Sertoli cell development	6/2365	11/18862	0.00101552	0.0107881	0.0083297	SDC1/SOX9/HSD17B4/FLNA/RAB13/ICAM1	6
BP	GO:0009165	nucleotide biosynthetic process	51/2365	264/18862	0.00103606	0.010987	0.00848323	KYNU/IDH2/IDO1/ATP5F1C/PARP1/GMPS/AK2/PARP9/NNMT/TMSB4X/ENO1/ATP5F1B/ADA/ATP5ME/AK3/ATP5PB/STOML2/ATP5MC3/UPP1/NAMPT/PRPSAP2/RRM1/CTPS1/ATP5F1A/TBPL1/VCP/SLC25A1/UMPS/AK4/NME7/ATIC/MTHFD1/PAPSS1/NME1/NMRK1/ALDOA/PDK1/PAICS/PDHX/TYMS/RFK/PRPS2/HSD17B8/SCD/ATP6V1A/ELOVL1/APRT/NME3/ATP5MG/SLC35B2/RRM2	51
BP	GO:0018126	protein hydroxylation	10/2365	27/18862	0.00104672	0.0110806	0.00855549	ASPH/ERO1A/P4HB/P3H2/P4HA1/CRTAP/PLOD3/PRDX4/EGLN3/PLOD2	10
BP	GO:0042306	regulation of protein import into nucleus	16/2365	56/18862	0.00106453	0.0112297	0.00867059	HSP90AB1/RAN/ANGPT1/APOD/RBM22/PKIG/PIK3R1/CDH1/CHP1/TPR/NUP62/HDAC3/FLNA/NOLC1/HYAL2/PSEN1	16
BP	GO:0051289	protein homotetramerization	16/2365	56/18862	0.00106453	0.0112297	0.00867059	AQP5/GBP5/SHMT1/APIP/B2M/SAMHD1/ALDH9A1/SHMT2/CRYZ/ALDOA/HSD17B10/GOLGA2/TK1/USP16/ACOT13/CBY1	16
BP	GO:0046390	ribose phosphate biosynthetic process	40/2365	195/18862	0.00107425	0.0113124	0.00873451	ATP5F1C/PARP1/GMPS/AK2/TMSB4X/ENO1/ATP5F1B/ATP5ME/AK3/ATP5PB/STOML2/ATP5MC3/UPP1/PRPSAP2/CTPS1/ATP5F1A/VCP/SLC25A1/UMPS/AK4/NME7/ATIC/PAPSS1/NME1/ALDOA/PDK1/PAICS/PDHX/PYGL/RFK/PRPS2/HSD17B8/SCD/ATP6V1A/ELOVL1/APRT/NME3/ATP5MG/SLC35B2/G6PD	40
BP	GO:0022612	gland morphogenesis	26/2365	111/18862	0.00108005	0.0113537	0.00876639	TBX3/CRIP1/BCL2/PTN/NKX3-1/CAV1/CDC42/PROX1/ELF3/SOX9/PML/CEACAM1/KDM5B/PHB2/LAMA5/HPN/DAG1/BAX/EPHA2/TGFBR2/CEBPB/TGM2/MDK/DDR1/MSN/XBP1	26
BP	GO:0002753	cytoplasmic pattern recognition receptor signaling pathway	19/2365	72/18862	0.00110214	0.0115658	0.00893014	RPS27A/DDX58/IFIH1/NOP53/BIRC3/LSM14A/UBE2N/HSPA1A/PHB2/C1QBP/NPLOC4/DDX60/INAVA/USP15/XIAP/NFKBIA/RIOK3/UFD1/TSPAN6	19
BP	GO:0002221	pattern recognition receptor signaling pathway	42/2365	208/18862	0.00113514	0.0118914	0.00918153	FGB/RPS27A/FGG/FGA/HSPD1/CTSL/DDX58/LTF/IRF1/IFIH1/CTSB/NOP53/S100A14/CAV1/BIRC3/HMGB1/LSM14A/ITGB2/UBE2N/HSPA1A/UBE2D2/NMI/PHB2/S100A8/UNC93B1/TNIP1/C1QBP/NPLOC4/DDX60/INAVA/LGMN/TNIP2/MAPKAPK2/CYBA/USP15/XIAP/CTSS/S100A9/NFKBIA/RIOK3/UFD1/TSPAN6	42
BP	GO:0002832	negative regulation of response to biotic stimulus	24/2365	100/18862	0.00115247	0.012052	0.00930553	IFI16/HLA-B/RPS19/LGALS9/LTF/SERPING1/PARP14/SAMHD1/HLA-E/YTHDF2/PRDX2/SERPINB4/NMI/CEACAM1/CNOT7/C1QBP/NPLOC4/HLA-F/HLA-A/GRN/PCBP2/RIOK3/UFD1/TSPAN6	24
BP	GO:0009206	purine ribonucleoside triphosphate biosynthetic process	18/2365	67/18862	0.00117822	0.0122361	0.00944771	ATP5F1C/PARP1/TMSB4X/ENO1/ATP5F1B/ATP5ME/ATP5PB/STOML2/ATP5MC3/ATP5F1A/VCP/AK4/NME7/NME1/ALDOA/ATP6V1A/NME3/ATP5MG	18
BP	GO:1900046	regulation of hemostasis	18/2365	67/18862	0.00117822	0.0122361	0.00944771	FGB/F3/FGG/FGA/TFPI/SERPING1/CD9/CAV1/TSPAN8/PLAU/PRDX2/CEACAM1/PROS1/EDN1/NFE2L2/ST3GAL4/VKORC1/PLAUR	18
BP	GO:0036499	PERK-mediated unfolded protein response	9/2365	23/18862	0.00118022	0.0122361	0.00944771	AGR2/ABCA7/DDIT3/ATF3/PPP1R15A/NFE2L2/TMED2/NCK1/HSPA5	9
BP	GO:0039531	regulation of viral-induced cytoplasmic pattern recognition receptor signaling pathway	9/2365	23/18862	0.00118022	0.0122361	0.00944771	NOP53/BIRC3/C1QBP/NPLOC4/DDX60/USP15/RIOK3/UFD1/TSPAN6	9
BP	GO:1904666	regulation of ubiquitin protein ligase activity	9/2365	23/18862	0.00118022	0.0122361	0.00944771	RPL5/RPL11/MAD2L2/RPS7/SKP1/FBXO5/UBE2S/CDC20/GOLGA2	9
BP	GO:0022407	regulation of cell-cell adhesion	77/2365	437/18862	0.0011876	0.0122915	0.00949049	HLA-DRA/CD74/HLA-DRB1/HLA-DPA1/FGB/FGG/LGALS9/HLA-DPB1/FGA/HSPD1/SOX4/IDO1/MAD2L2/IRF1/MYB/SOX2/CD9/HSPH1/IGFBP2/CAV1/CDC42/CD55/HMGB1/HLA-E/GTPBP4/ADA/CD81/YTHDF2/RDX/CD24/CEACAM6/LGALS3/ITGB2/HLA-DMB/KIFAP3/FSTL3/PRDX2/ZC3H8/VEGFA/SPINT2/CEACAM1/PIK3R1/SCGB1A1/CCL28/LGALS1/CDH1/MAP3K8/ADAM8/ERBB2/TJP1/AKT1/PIEZO1/TGFBR2/CEBPB/ST3GAL4/HES1/NCK1/ANXA1/AP3D1/FLOT2/FXYD5/SDC4/IL6ST/TNFRSF21/HLA-A/Z…	77
BP	GO:0044774	mitotic DNA integrity checkpoint	25/2365	106/18862	0.00120173	0.0124165	0.00958697	MUC1/SOX4/TFDP2/SFN/NOP53/PCNA/BTG2/RPL26/NAE1/MSH2/PML/PRMT1/TP53/CNOT7/SYF2/BAX/AURKA/CNOT2/CDK1/CCNB1/ARID3A/TNKS1BP1/MDM4/CNOT11/CCND1	25
BP	GO:0000463	maturation of LSU-rRNA from tricistronic rRNA transcript (SSU-rRNA, 5.8S rRNA, LSU-rRNA)	7/2365	15/18862	0.00123937	0.0127182	0.00981996	RPF2/NIFK/WDR12/GTPBP4/DDX18/RPL35/RPL7L1	7
BP	GO:0019511	peptidyl-proline hydroxylation	7/2365	15/18862	0.00123937	0.0127182	0.00981996	ERO1A/P4HB/P3H2/P4HA1/CRTAP/PRDX4/EGLN3	7
BP	GO:0035635	entry of bacterium into host cell	7/2365	15/18862	0.00123937	0.0127182	0.00981996	CAV1/MET/CDH1/ITGAV/KRT6A/CTNND1/CTNNB1	7
BP	GO:0043558	regulation of translational initiation in response to stress	7/2365	15/18862	0.00123937	0.0127182	0.00981996	NPM1/EIF2AK2/PPP1CA/PPP1R15A/TMED2/NCK1/DNAJC3	7
BP	GO:0051651	maintenance of location in cell	42/2365	209/18862	0.00125196	0.0128256	0.00990288	FTL/ERO1A/SRGN/LCN2/CXCL10/SRI/ANXA6/TMSB4X/CAV1/INSIG1/CHCHD10/TMEM38B/CXCL11/PML/SKP1/S100A8/CALM2/SP100/BARD1/CALM3/DDIT3/TOPORS/ARL2BP/P2RY6/HNRNPU/ATG5/DBN1/KDELR2/AKT1/BAX/GSN/KDELR3/NOL3/AP3D1/AKAP9/PSEN1/S100A9/TSPO/RER1/GPAA1/GOLPH3/HSPA5	42
BP	GO:0006271	DNA strand elongation involved in DNA replication	8/2365	19/18862	0.00126454	0.0129107	0.00996859	PCNA/GINS2/MCM7/MCM3/LIG1/POLE3/RFC4/RFC3	8
BP	GO:2000757	negative regulation of peptidyl-lysine acetylation	8/2365	19/18862	0.00126454	0.0129107	0.00996859	HDAC2/NOC2L/CTBP1/THAP7/ATG5/TAF7/SDR16C5/SET	8
BP	GO:0071426	ribonucleoprotein complex export from nucleus	29/2365	130/18862	0.0013137	0.01339	0.0103386	NPM1/EIF5A/SSB/SRRM1/RAN/SRSF3/RAE1/ALKBH5/CDC40/MAGOH/MAGOHB/SRSF7/SLU7/TPR/SRSF2/NUP62/DDX39A/NCBP2/RBM8A/UPF2/SRSF4/HNRNPA2B1/SRSF11/NMD3/FYTTD1/AGFG1/THOC6/SEC13/SLBP	29
BP	GO:0009201	ribonucleoside triphosphate biosynthetic process	19/2365	73/18862	0.00131766	0.0134077	0.0103523	ATP5F1C/PARP1/TMSB4X/ENO1/ATP5F1B/ATP5ME/ATP5PB/STOML2/ATP5MC3/CTPS1/ATP5F1A/VCP/AK4/NME7/NME1/ALDOA/ATP6V1A/NME3/ATP5MG	19
BP	GO:0006301	postreplication repair	15/2365	52/18862	0.00135625	0.013754	0.0106197	UBE2L6/ISG15/RPS27A/MAD2L2/PCNA/MSH2/UBE2N/VCP/POLD4/NPLOC4/RFC4/RFC1/RFC3/UBE2A/UFD1	15
BP	GO:0043392	negative regulation of DNA binding	15/2365	52/18862	0.00135625	0.013754	0.0106197	IFI16/HDAC2/MAD2L2/SRI/TMSB4X/JUN/ID1/HEY1/ZNF462/KDM1A/SP100/DDIT3/SUMO1/PSEN1/NFKBIA	15
BP	GO:0071364	cellular response to epidermal growth factor stimulus	13/2365	42/18862	0.00137172	0.0138642	0.0107048	EEF1A1/ERRFI1/SOX9/ID1/GSTP1/MCM7/PTPN12/ZFP36/ERBB2/AKT1/COL1A1/ZFP36L2/PTPN11	13
BP	GO:0071604	transforming growth factor beta production	13/2365	42/18862	0.00137172	0.0138642	0.0107048	HSP90AB1/LGALS9/MYB/FURIN/CD24/TSKU/ITGB6/ITGAV/LAPTM4B/HIF1A/LTBP3/CD2AP/CD46	13
BP	GO:0051972	regulation of telomerase activity	14/2365	47/18862	0.00137977	0.0139223	0.0107496	HSP90AB1/HSP90AA1/TCP1/XRCC5/CCT2/CCT4/PTGES3/PKIB/DKC1/TP53/NVL/MYC/HNRNPA2B1/MAPK3	14
BP	GO:2000278	regulation of DNA biosynthetic process	25/2365	107/18862	0.0013848	0.0139497	0.0107708	HSP90AB1/HSP90AA1/TCP1/XRCC5/CCT2/CCT4/HNRNPA1/CCT3/PCNA/CCT7/DUSP1/CCT5/PTGES3/PKIB/DKC1/TP53/HNRNPC/NVL/CCT8/HNRNPU/RFC4/MYC/HNRNPA2B1/RFC3/MAPK3	25
BP	GO:0030177	positive regulation of Wnt signaling pathway	37/2365	179/18862	0.001401	0.0140893	0.0108786	PSMB9/PSMB1/SOX4/PSMB8/PSMA4/PSMC4/PSMA7/CAV1/PSME2/PLEKHA4/PSME1/PSMD14/PSMA5/PSMB2/PSMA3/PSMD8/RUVBL1/VCP/PSMD1/PSMD7/RSPO3/PSMD4/PSMA1/PSMD11/GID8/YAP1/SMARCA4/PSMC3/CSNK2A1/PSMD6/PSMD2/CDC73/PSMD3/CSNK1E/XIAP/COL1A1/CSNK1D	37
BP	GO:0009145	purine nucleoside triphosphate biosynthetic process	18/2365	68/18862	0.00141762	0.0142328	0.0109894	ATP5F1C/PARP1/TMSB4X/ENO1/ATP5F1B/ATP5ME/ATP5PB/STOML2/ATP5MC3/ATP5F1A/VCP/AK4/NME7/NME1/ALDOA/ATP6V1A/NME3/ATP5MG	18
BP	GO:2000377	regulation of reactive oxygen species metabolic process	39/2365	192/18862	0.0014888	0.0149227	0.011522	HSP90AB1/HSP90AA1/AKR1C3/BCL2/CAV1/SLC25A33/ITGB2/BNIP3/PRDX2/GSTP1/VDAC1/TP53/GNAI3/TRAP1/PRCP/EDN1/ATG5/SOD1/NFE2L2/AKT1/CLU/GLA/HIF1A/TGFBR2/ROMO1/DDAH2/HBB/ARF4/P2RX4/SELENOS/CLCN3/CYBA/ICAM1/TUSC2/RAC1/TSPO/G6PD/SLC5A3/NQO2	39
BP	GO:0051402	neuron apoptotic process	45/2365	230/18862	0.00151822	0.0151923	0.0117302	NUPR1/GAPDH/HSP90AB1/PARP1/MYB/BCL2/FAM162A/ANGPT1/BTG2/CDC42/NAE1/MSH2/SIX1/JUN/RETREG1/BNIP3/TP53/NDNF/DDIT3/GBA/SOD1/ADAM8/CLCF1/FOXO3/BAX/HIF1A/CEBPB/CDC34/LGMN/USP53/GCLM/SET/XIAP/TNFRSF21/PSEN1/MDK/NCSTN/GRN/ERBB3/EGLN3/G6PD/NQO1/CTNNB1/HSPA5/NQO2	45
BP	GO:0044773	mitotic DNA damage checkpoint	24/2365	102/18862	0.00154232	0.0153824	0.011877	MUC1/SOX4/TFDP2/SFN/NOP53/PCNA/BTG2/RPL26/MSH2/PML/PRMT1/TP53/CNOT7/SYF2/BAX/AURKA/CNOT2/CDK1/CCNB1/ARID3A/TNKS1BP1/MDM4/CNOT11/CCND1	24
BP	GO:0071887	leukocyte apoptotic process	24/2365	102/18862	0.00154232	0.0153824	0.011877	RPS6/CDKN2A/CD74/LGALS9/IDO1/TCP1/CTSL/ADA/LGALS3/NOC2L/BAK1/ZC3H8/SLC7A11/TP53/ADAM8/AKT1/BAX/HIF1A/TSC22D3/CRKL/SELENOS/ANXA1/IRS2/TNFRSF21	24
BP	GO:0002685	regulation of leukocyte migration	41/2365	205/18862	0.00156084	0.0155415	0.0119998	CD74/S100A7/LGALS9/CXCL10/PTN/S100A14/HMGB1/ADA/APOD/CD81/DUSP1/LGALS3/NBL1/ITGA2/VEGFA/ZNF580/CD99/CCL28/DDT/PLCB1/EDN1/C1QBP/ADAM8/AKT1/CCL20/ST3GAL4/LGMN/P2RX4/CRKL/ANXA1/MAPK3/MMP14/WASL/MIF/ICAM1/MTUS1/MDK/SELENOK/RAC1/IL27RA/MSN	41
BP	GO:0000819	sister chromatid segregation	40/2365	199/18862	0.00160337	0.0159386	0.0123064	MAD2L2/SMC2/RAN/IK/VPS4B/DUSP1/RAB11A/NUDC/NAA10/SFPQ/BUB3/NAA50/SMC4/BOD1/SMC3/PHB2/ESCO1/FBXO5/TTK/PTTG1/TPR/HNRNPU/NUP62/ANAPC11/FEN1/CENPF/NIPBL/KIF2C/RAD21/CCNB1/NUF2/CDC20/NUSAP1/CHMP1B/RMDN1/CDC26/CHMP4C/TOP2A/CTNNB1/SMC5	40
BP	GO:0043434	response to peptide hormone	76/2365	435/18862	0.00161561	0.0160339	0.01238	STAT1/ERRFI1/TIMP1/TFF1/PARP1/TNFSF10/CDK4/CACYBP/PIK3R3/LPL/CAV2/CAV1/BTG2/SLC25A33/INSIG1/NUCKS1/SLC2A1/CDC5L/SMARCC1/UCP2/PHIP/CEACAM1/GSTP1/PIK3R1/LPIN1/APEX1/EDN1/EIF2B3/IRS1/ATP6V1F/RBBP4/GGH/CA2/DAG1/BAIAP2/TCIRG1/NFE2L2/ATP6V1G1/AKT1/EREG/PRKAA1/ATP6V1B2/SRSF4/CYC1/IGF1R/PNPT1/SELENOS/JUND/NCK1/ANXA1/ADM/MYO1C/EGR1/IRS2/AGTRAP/SHC1/ATP2B1/BAIAP2L1/ATP6V1A/COL1A1/APRT/RAB13/ZBTB7B/ICAM1/LP…	76
BP	GO:0006356	regulation of transcription by RNA polymerase I	11/2365	33/18862	0.0016204	0.016055	0.0123963	NOP53/SMARCB1/PWP1/POLR2L/NCL/WDR75/WDR43/SMARCA4/ERBB2/FLNA/SIRT7	11
BP	GO:0008406	gonad development	42/2365	212/18862	0.00166797	0.0164722	0.0127184	NUPR1/TESC/AKR1C3/TNFSF10/BASP1/BCL2/NKX3-1/NASP/SDC1/CSDE1/MSH2/TGFBR1/SOX9/ERCC1/COL9A3/FSTL3/HSD17B4/VEGFA/TFAP2C/RRM1/ADAM15/YBX3/ANG/SOD1/EREG/BAX/PLEKHA1/CEBPB/FLNA/NCOA4/CRKL/EIF2S2/HMGB2/MMP14/PRDX4/IMMP2L/RAB13/ICAM1/BIK/MGST1/CCND1/HSPA5	42
BP	GO:0050870	positive regulation of T cell activation	42/2365	212/18862	0.00166797	0.0164722	0.0127184	HLA-DRA/CD74/HLA-DRB1/HLA-DPA1/LGALS9/HLA-DPB1/HSPD1/SOX4/MYB/HSPH1/IGFBP2/CAV1/CDC42/CD55/HMGB1/HLA-E/ADA/CD81/CD24/HLA-DMB/PIK3R1/LGALS1/MAP3K8/ADAM8/AKT1/TGFBR2/HES1/NCK1/ANXA1/AP3D1/FLOT2/IL6ST/HLA-A/ZBTB7B/MDK/SELENOK/RAC1/RUNX1/IL27RA/PTPN11/XBP1/CD46	42
BP	GO:0051438	regulation of ubiquitin-protein transferase activity	15/2365	53/18862	0.00167566	0.0165211	0.0127562	RPL5/RPL11/MAD2L2/RPS2/RPS7/UBE2N/SKP1/FBXO5/UBE2L3/TOPORS/UBE2S/BMI1/CDC20/GOLGA2/PSEN1	15
BP	GO:0030879	mammary gland development	29/2365	132/18862	0.00168418	0.016578	0.0128001	TBX3/ID2/CAV1/ELF3/SOX9/PML/ITGA2/VEGFA/KDM5B/OAS2/PHB2/SLC29A1/UMPS/NME1/AKT1/PAM/BAX/EPHA2/HIF1A/TGFBR2/CEBPB/IRS2/NCOR2/APRT/ZBTB7B/GPAT4/DDR1/CCND1/XBP1	29
BP	GO:0043122	regulation of I-kappaB kinase/NF-kappaB signaling	47/2365	244/18862	0.00169233	0.0166311	0.0128412	STAT1/CD74/HLA-DRB1/LGALS9/HSPB1/TNFSF10/LTF/TRIM22/OPTN/APOL3/ANGPT1/BIRC3/UBE2N/S100A13/EEF1D/HDAC1/SQSTM1/GSTP1/TMED4/ATP2C1/LGALS1/TNIP1/UFL1/TRIM38/BST2/NUP62/S100A4/INAVA/FLNA/DHX36/PER1/TGM2/TNIP2/RHOC/SHISA5/TRADD/SLC44A2/TLE1/CANT1/MIB2/RIOK3/SLC35B2/TSPAN6/AKAP13/RBCK1/TRAF4/TNFRSF1A	47
BP	GO:0000245	spliceosomal complex assembly	20/2365	80/18862	0.00169919	0.0166443	0.0128514	PSIP1/SNRPE/SNRPD1/SNRPD2/SRSF10/SF3A3/RBMX/SLU7/SRPK1/CRNKL1/ISY1/SF3B1/PRPF19/PUF60/USP39/SNRPG/SNRPC/PRPF6/CELF1/NOL3	20
BP	GO:0030433	ubiquitin-dependent ERAD pathway	20/2365	80/18862	0.00169919	0.0166443	0.0128514	CAV1/UBXN4/FBXO2/VCP/SEC61B/NPLOC4/MAN1B1/TMEM129/NFE2L2/AMFR/UBE2J1/SELENOS/UBE2J2/RHBDD2/SEL1L/JKAMP/TMUB1/UFD1/BCAP31/HSPA5	20
BP	GO:0071398	cellular response to fatty acid	12/2365	38/18862	0.00171356	0.0167408	0.0129258	AKR1C2/AKR1C3/XRCC5/CDK4/LPL/AKR1C1/EDN1/ID3/IRS1/NME1/CLDN1/CCNB1	12
BP	GO:0051348	negative regulation of transferase activity	55/2365	296/18862	0.00171458	0.0167408	0.0129258	RPL5/CDKN2A/DNAJA1/ERRFI1/NPM1/RPL11/TESC/HSPB1/MAD2L2/GPRC5A/SFN/RACK1/PHPT1/YWHAB/CDKN2B/CAV1/RPS7/PPP1R1B/DUSP1/PPP2R1A/PKIB/CIB1/CEACAM1/GSTP1/PKIG/TP53/DTNBP1/FBXO5/EIF4A2/SMYD3/CHP1/ZFP36/GBA/PTK6/PDCD4/HNRNPU/NUP62/TAF7/PPP2CA/AKT1/DUSP4/DUSP6/MIDN/IGF1R/NCK1/DVL1/CHORDC1/IRS2/GNAQ/MVP/HYAL2/PSEN1/PPIA/DNAJC3/YWHAG	55
BP	GO:0002204	somatic recombination of immunoglobulin genes involved in immune response	14/2365	48/18862	0.00172642	0.0167749	0.0129522	HSPD1/MAD2L2/EXOSC3/MSH2/ERCC1/MSH6/UNG/RNF168/HMCES/BATF/CLCF1/RIF1/NSD2/IL27RA	14
BP	GO:0002208	somatic diversification of immunoglobulins involved in immune response	14/2365	48/18862	0.00172642	0.0167749	0.0129522	HSPD1/MAD2L2/EXOSC3/MSH2/ERCC1/MSH6/UNG/RNF168/HMCES/BATF/CLCF1/RIF1/NSD2/IL27RA	14
BP	GO:0045190	isotype switching	14/2365	48/18862	0.00172642	0.0167749	0.0129522	HSPD1/MAD2L2/EXOSC3/MSH2/ERCC1/MSH6/UNG/RNF168/HMCES/BATF/CLCF1/RIF1/NSD2/IL27RA	14
BP	GO:0000413	protein peptidyl-prolyl isomerization	13/2365	43/18862	0.00174356	0.0169142	0.0130597	FKBP4/FKBP2/PPIH/PPIL4/CWC27/FKBP11/PPIG/PPIC/FKBP5/PPIA/FKBP9/PPIB/PTPA	13
BP	GO:0071496	cellular response to external stimulus	56/2365	303/18862	0.00177542	0.0171956	0.013277	IFI16/AQP3/AKR1C3/CASP8AP2/IRF1/EIF2AK2/HNRNPA1/BCL2/PTN/LPL/CDKN2B/RRAGD/SLC2A1/RRAGA/JUN/SOX9/BNIP3/BAK1/ITGA2/UPP1/UCP2/EHMT2/CD68/GSTP1/TP53/TXN2/HSPA8/MAPK8/ATF3/DNAJC15/GBA/STK24/ATG5/DAG1/NFE2L2/FOXO3/AKT1/PRKAA1/PIEZO1/SIPA1/DCTPP1/XPR1/FES/MAPK3/ATP2B1/GCN1/COL1A1/ICAM1/F11R/RAC1/PTPN11/XBP1/HSPA5/CNN2/MAP1LC3B/TNFRSF1A	56
BP	GO:0000727	double-strand break repair via break-induced replication	6/2365	12/18862	0.00181605	0.0174213	0.0134513	MCM6/GINS2/MCM7/MCM3/MCM2/MCM5	6
BP	GO:0006465	signal peptide processing	6/2365	12/18862	0.00181605	0.0174213	0.0134513	FURIN/SPCS1/SPCS3/IMMP2L/HM13/SPCS2	6
BP	GO:0006620	posttranslational protein targeting to endoplasmic reticulum membrane	6/2365	12/18862	0.00181605	0.0174213	0.0134513	SEC61B/SEC61G/SEC63/SEC62/SEC61A1/HSPA5	6
BP	GO:0060670	branching involved in labyrinthine layer morphogenesis	6/2365	12/18862	0.00181605	0.0174213	0.0134513	ST14/SPINT1/SPINT2/RSPO3/FZD5/ADM	6
BP	GO:1903332	regulation of protein folding	6/2365	12/18862	0.00181605	0.0174213	0.0134513	PDCD5/PDCL3/SNRNP70/ST13/GRN/HSPA5	6
BP	GO:2000767	positive regulation of cytoplasmic translation	6/2365	12/18862	0.00181605	0.0174213	0.0134513	YTHDF2/CNBP/YBX3/DHX36/NCK1/EEF2	6
BP	GO:1990542	mitochondrial transmembrane transport	25/2365	109/18862	0.00182381	0.0174216	0.0134515	HSPD1/ATP5F1C/SLC25A33/SLC25A6/ATP5F1B/ATP5ME/ATP5PB/STOML2/ATP5MC3/MPC1/UCP2/TOMM20/VDAC1/ATP5F1A/SLC25A5/SLC25A1/TIMM17A/DNAJC15/TIMM17B/TIMM50/ROMO1/PNPT1/TOMM7/SLC39A8/ATP5MG	25
BP	GO:0002562	somatic diversification of immune receptors via germline recombination within a single locus	17/2365	64/18862	0.00182474	0.0174216	0.0134515	HSPD1/MAD2L2/HMGB1/EXOSC3/MSH2/ERCC1/MSH6/DCLRE1C/UNG/RNF168/HMCES/BATF/CLCF1/RIF1/HMGB2/NSD2/IL27RA	17
BP	GO:0016444	somatic cell DNA recombination	17/2365	64/18862	0.00182474	0.0174216	0.0134515	HSPD1/MAD2L2/HMGB1/EXOSC3/MSH2/ERCC1/MSH6/DCLRE1C/UNG/RNF168/HMCES/BATF/CLCF1/RIF1/HMGB2/NSD2/IL27RA	17
BP	GO:0008360	regulation of cell shape	32/2365	151/18862	0.00187092	0.0178343	0.0137702	RHOB/PTN/PRPF40A/RDX/HCK/ITGB2/S100A13/RHOD/PLXNB2/VEGFA/FBLIM1/PHIP/RHOF/PLEKHO1/RND3/HPN/DAG1/ALDOA/BAIAP2/SHROOM3/TPM1/ANXA1/CDC42SE1/FES/MKLN1/RHOC/EZR/ICAM1/F11R/RAC1/RAC3/MSN	32
BP	GO:0032869	cellular response to insulin stimulus	44/2365	226/18862	0.00187969	0.0178557	0.0137866	ERRFI1/PARP1/CDK4/PIK3R3/LPL/CAV2/SLC25A33/INSIG1/NUCKS1/SMARCC1/UCP2/PHIP/CEACAM1/GSTP1/PIK3R1/LPIN1/IRS1/ATP6V1F/BAIAP2/TCIRG1/ATP6V1G1/AKT1/PRKAA1/ATP6V1B2/IGF1R/SELENOS/NCK1/MYO1C/IRS2/SHC1/ATP2B1/BAIAP2L1/ATP6V1A/APRT/RAB13/ZBTB7B/LPIN2/YWHAG/USO1/PTPN11/XBP1/ATP6V1E1/ATP6AP1/CCND3	44
BP	GO:0042177	negative regulation of protein catabolic process	27/2365	121/18862	0.00188265	0.0178557	0.0137866	RPL5/HSP90AB1/RPL11/TIMP1/MAD2L2/CST3/SNX3/NOP53/RPS7/FURIN/SDCBP/SMARCC1/PML/ATRAID/TIMP2/ANXA2/SF3B3/PDCL3/WAC/LAPTM4B/CSNK2A1/SNRNP70/FLNA/UBXN1/CTSA/MDM4/PSEN1	27
BP	GO:0002262	myeloid cell homeostasis	31/2365	145/18862	0.00188736	0.0178557	0.0137866	STAT1/RPS6/RPS19/ISG15/RPS14/B2M/MAFB/HMGB1/EPAS1/ATP5IF1/HSPA9/HSPA1A/BAK1/CEBPG/VEGFA/PRMT1/SLC7A11/FAM210B/SMAP1/UFL1/ZFP36/UBA5/SOD1/FOXO3/BAX/HIF1A/MAEA/ANXA1/HMGB2/NCSTN/G6PD	31
BP	GO:0051592	response to calcium ion	31/2365	145/18862	0.00188736	0.0178557	0.0137866	S100A16/FGB/FGG/FGA/AQP3/AKR1C3/CACYBP/CAV1/ADAM9/SDC1/DUSP1/SYT8/CALM2/CALM3/CLIC4/EDN1/PEF1/PRKAA1/ANXA11/SEC31A/LGMN/JUND/TXNIP/PTGES/FOSB/NCSTN/JUNB/PDCD6/AHCYL1/CCND1/HSPA5	31
BP	GO:0002064	epithelial cell development	41/2365	207/18862	0.00188795	0.0178557	0.0137866	CXCR4/SFN/IFT74/ST14/SDC1/PROX1/RFX3/MET/RDX/SOX9/HSD17B4/VEGFA/SPINT2/KLF5/PLCB1/RILPL2/FOSL2/CLIC4/YAP1/ABI2/SOD1/CLDN1/TJP1/TYMS/EPHA2/HIF1A/SHROOM3/FLNA/MYO1E/RAB25/PLOD3/B4GALT1/EZR/IL6ST/RAB13/ICAM1/YIPF6/F11R/GPAT4/MSN/TNFRSF1A	41
BP	GO:0009636	response to toxic substance	46/2365	239/18862	0.00191371	0.0180709	0.0139529	NUPR1/GPX4/CDK4/GPX2/MT1E/BCL2/CES1/AKR1B10/SDC1/ESD/MT1M/PRDX2/GPX3/BAK1/GSTP1/KDM5B/SLC7A11/CNP/KDM1A/SELENOW/SCN9A/CDH1/GSR/AHR/TXNRD2/SOD1/CLDN1/NFE2L2/MGST2/BAX/TYMS/HBB/PRDX5/PRDX1/SELENOS/PON2/SLC22A18/CCNB1/MAPK3/PTGES/PRDX4/TXNRD1/MGST1/S100A9/RALBP1/NQO1	46
BP	GO:0001916	positive regulation of T cell mediated cytotoxicity	10/2365	29/18862	0.00196326	0.0183936	0.014202	HLA-B/HLA-DRA/AZGP1/HLA-DRB1/B2M/HLA-E/HLA-F/PVR/NECTIN2/HLA-A	10
BP	GO:0035067	negative regulation of histone acetylation	7/2365	16/18862	0.00196617	0.0183936	0.014202	NOC2L/CTBP1/THAP7/ATG5/TAF7/SDR16C5/SET	7
BP	GO:0043174	nucleoside salvage	7/2365	16/18862	0.00196617	0.0183936	0.014202	CDA/MTAP/UPP1/PRTFDC1/TYMP/APRT/TK1	7
BP	GO:0044764	multi-organism cellular process	7/2365	16/18862	0.00196617	0.0183936	0.014202	CXCR4/CTSL/CAV2/CAV1/NECTIN2/HYAL2/PPIA	7
BP	GO:0051238	sequestering of metal ion	7/2365	16/18862	0.00196617	0.0183936	0.014202	S100A7/FTL/LCN2/SRI/S100A8/AP3D1/S100A9	7
BP	GO:0070242	thymocyte apoptotic process	7/2365	16/18862	0.00196617	0.0183936	0.014202	ADA/BAK1/ZC3H8/TP53/ADAM8/BAX/HIF1A	7
BP	GO:0016236	macroautophagy	57/2365	311/18862	0.00197839	0.0184793	0.0142681	NUPR1/GAPDH/OPTN/PLAA/RRAGD/VPS4B/QSOX1/RRAGA/RETREG1/BNIP3/VPS28/SQSTM1/CSNK2B/TOMM20/VDAC1/PHB2/TP53/VCP/GNAI3/MAPK8/UFL1/GBA/WAC/ATG5/UBA5/VTA1/TCIRG1/ATP6V1G1/LGALS8/CSNK2A1/EI24/AKT1/PRKAA1/SMURF1/ATP6V1B2/HIF1A/UFC1/TOMM5/TOMM7/ATG12/MAPK3/LAMTOR3/LAMTOR4/LAMTOR1/TEX264/ATP6V1A/UBXN6/SNAP29/SCOC/PSEN1/IFT20/LAMTOR2/CHMP4C/RAB1B/RAB5A/ATP6V1E1/MAP1LC3B	57
BP	GO:0051099	positive regulation of binding	35/2365	170/18862	0.0019911	0.0185692	0.0143376	STMN1/S100A10/HSP90AB1/RPL11/PARP1/B2M/PARP9/EIF3E/RAN/CAV1/HMGB1/MET/LARP6/CEBPG/ITGA2/CTHRC1/EIF3D/KDM1A/CALM3/ANXA2/GTF2B/NVL/EDF1/NME1/RAMP1/PPP2CA/PPP2CB/AMFR/NMD3/HES1/HMGB2/PSEN1/HIP1R/CTNNB1/PLAUR	35
BP	GO:1903533	regulation of protein targeting	20/2365	81/18862	0.00199522	0.0185789	0.0143451	SAE1/PDCD5/STOM/ITGB2/ATP5IF1/FIS1/CIB1/UBE2L3/CHP1/ERBB2/PRKAA1/FZD5/NPEPPS/UBE2J2/MYO1C/TOMM7/UBL5/NUCB1/LMAN1/LEPROT	20
BP	GO:0042098	T cell proliferation	39/2365	195/18862	0.00200012	0.0185959	0.0143582	RPS6/HLA-DRB1/HLA-DPA1/LGALS9/HLA-DPB1/IDO1/IRF1/CD151/IGFBP2/CD55/HMGB1/HLA-E/CD81/CD24/LGALS3/HLA-DMB/PRDX2/CTPS1/SCGB1A1/TP53/ERBB2/BAX/SLC11A1/TGFBR2/CEBPB/HES1/NCK1/ANXA1/SDC4/IL6ST/TNFRSF21/HLA-A/ZBTB7B/NCSTN/SELENOK/IL27RA/MSN/CD46/CCND3	39
BP	GO:1902369	negative regulation of RNA catabolic process	18/2365	70/18862	0.00202131	0.018764	0.014488	YBX1/PAIP1/HNRNPA0/SYNCRIP/DKC1/ZCCHC17/HNRNPC/THRAP3/YBX3/ZFP36/HNRNPU/PKP3/SLC11A1/DHX36/MAPKAPK2/TAF15/TOB1/SECISBP2	18
BP	GO:1903034	regulation of response to wounding	34/2365	164/18862	0.00202848	0.0188016	0.014517	SPP1/CXCR4/FGB/F3/FGG/FGA/TFPI/SERPING1/PTN/CD9/CAV1/TSPAN8/HMGB1/PLAU/TNFRSF12A/PRDX2/CEACAM1/KLK8/PROS1/EDN1/STK24/CERS2/CLDN1/NFE2L2/ST3GAL4/FLNA/CLDN4/ANXA1/MDK/GRN/VKORC1/PTPRF/XBP1/PLAUR	34
BP	GO:0072522	purine-containing compound biosynthetic process	41/2365	208/18862	0.00207278	0.0191827	0.0148113	ATP5F1C/PARP1/SHMT1/GMPS/AK2/MTAP/TMSB4X/ENO1/ATP5F1B/ADA/ATP5ME/AK3/ATP5PB/STOML2/ATP5MC3/PRPSAP2/ATP5F1A/VCP/SHMT2/SLC25A1/AK4/NME7/PRTFDC1/ATIC/MTHFD1/PAPSS1/NME1/NT5E/ALDOA/PDK1/PAICS/PDHX/PRPS2/HSD17B8/SCD/ATP6V1A/ELOVL1/APRT/NME3/ATP5MG/SLC35B2	41
BP	GO:0015931	nucleobase-containing compound transport	48/2365	253/18862	0.00210372	0.0194393	0.0150094	YBX1/NPM1/EIF5A/SSB/HNRNPA1/SRRM1/RAN/SRSF3/RAE1/SLC25A33/SLC25A6/ALKBH5/CDC40/MAGOH/KHDRBS1/MAGOHB/SRSF7/SFPQ/TOMM20/SLU7/SLC25A5/SLC29A1/PHAX/ZFP36/TPR/SRSF2/CPSF6/HNRNPU/NUP62/DDX39A/NCBP2/RBM8A/UPF2/TGFBR2/SRSF4/HNRNPA2B1/PNPT1/SRSF11/NMD3/SLC35A2/MYO1C/FYTTD1/AGFG1/MVP/SLC35B2/THOC6/SEC13/SLBP	48
BP	GO:0006919	activation of cysteine-type endopeptidase activity involved in apoptotic process	21/2365	87/18862	0.0021107	0.0194739	0.0150361	F3/HSPD1/TNFSF10/HSPE1/CASP8AP2/FAM162A/PDCD2/RACK1/NKX3-1/PML/BAK1/S100A8/VCP/MTCH1/BAX/BCL2L13/TRADD/S100A9/PDCD6/HIP1R/EGLN3	21
BP	GO:0043094	cellular metabolic compound salvage	11/2365	34/18862	0.00212745	0.0195779	0.0151164	CDA/APIP/MTAP/ADA/UPP1/PDXK/PRTFDC1/BHMT2/TYMP/APRT/TK1	11
BP	GO:0061008	hepaticobiliary system development	30/2365	140/18862	0.00213152	0.0195779	0.0151164	PTN/PCNA/ADA/PROX1/MET/SOX9/CEBPG/ITGA2/UCP2/CEACAM1/MESP1/AK4/SEC63/EZH2/HPN/CLDN1/TYMS/UPF2/AURKA/CEBPB/NIPBL/PNPT1/HES1/ANXA1/MDK/KRT18/ARF6/GFER/CCND1/XBP1	30
BP	GO:0009895	negative regulation of catabolic process	57/2365	312/18862	0.00213171	0.0195779	0.0151164	YBX1/RPL5/NUPR1/HSP90AB1/RPL11/TIMP1/MAD2L2/PAIP1/CST3/BCL2/SNX3/NOP53/RPS7/FURIN/QSOX1/HNRNPA0/RRAGA/MET/SDCBP/SYNCRIP/SMARCC1/PML/DKC1/ZCCHC17/TP53/ATRAID/TIMP2/HNRNPC/ANXA2/THRAP3/SF3B3/YBX3/PDCL3/ZFP36/WAC/APOC1/HNRNPU/LAPTM4B/PKP3/DDIT4/CSNK2A1/AKT1/PRKAA1/SLC11A1/SNRNP70/FLNA/DHX36/UBXN1/MAPKAPK2/TAF15/CTSA/GOLGA2/MDM4/PSEN1/TOB1/TSPO/SECISBP2	57
BP	GO:0009612	response to mechanical stimulus	40/2365	202/18862	0.00213733	0.0195998	0.0151333	CXCR4/CASP8AP2/IRF1/CXCL10/PTN/IGFBP2/BTG2/SLC2A1/JUN/SOX9/BNIP3/BAK1/ITGA2/EDN1/MAPK8/HPN/DAG1/AKT1/GSN/TMEM120A/PIEZO1/TGFBR2/USP53/JUND/CCNB1/MAPK3/TXNIP/PPL/MMP14/COL1A1/FOSB/MDK/F11R/NFKBIA/RAC1/PTPN11/CTNNB1/ABHD12/CNN2/TNFRSF1A	40
BP	GO:0002576	platelet degranulation	28/2365	128/18862	0.00214282	0.0196203	0.0151492	FGB/FGG/TIMP1/FGA/SRGN/OLA1/SERPING1/CFD/SERPINA1/CD9/APLP2/CD63/TMSB4X/QSOX1/FAM3C/VEGFA/CDC37L1/PROS1/TAGLN2/SELENOP/ALDOA/SOD1/CLU/CHID1/ANXA5/FLNA/TEX264/VTI1B	28
BP	GO:1903039	positive regulation of leukocyte cell-cell adhesion	45/2365	234/18862	0.00216432	0.0197871	0.0152779	HLA-DRA/CD74/HLA-DRB1/HLA-DPA1/LGALS9/HLA-DPB1/HSPD1/SOX4/MYB/HSPH1/IGFBP2/CAV1/CDC42/CD55/HMGB1/HLA-E/ADA/CD81/CD24/ITGB2/HLA-DMB/PIK3R1/LGALS1/MAP3K8/ADAM8/AKT1/TGFBR2/ST3GAL4/HES1/NCK1/ANXA1/AP3D1/FLOT2/IL6ST/HLA-A/ZBTB7B/ICAM1/MDK/SELENOK/RAC1/RUNX1/IL27RA/PTPN11/XBP1/CD46	45
BP	GO:0090307	mitotic spindle assembly	17/2365	65/18862	0.00218735	0.0199675	0.0154172	LSM14A/VPS4B/RAB11A/HSPA1A/DRG1/SMC3/MISP/TPR/HNRNPU/KIF2A/MZT1/FLNA/CDC20/TPX2/GOLGA2/CHMP1B/CHMP4C	17
BP	GO:0007339	binding of sperm to zona pellucida	13/2365	44/18862	0.00219488	0.0199758	0.0154236	PAEP/TCP1/CLGN/CCT2/CCT4/CCT3/CCT7/LY6K/CCT5/TEX101/CCT8/ALDOA/B4GALT1	13
BP	GO:0090199	regulation of release of cytochrome c from mitochondria	13/2365	44/18862	0.00219488	0.0199758	0.0154236	TNFSF10/FAM162A/PDCD5/BNIP3/BAK1/FXN/TP53/AKT1/BAX/CLU/NOL3/BIK/PLAUR	13
BP	GO:0034284	response to monosaccharide	39/2365	196/18862	0.00220146	0.0200054	0.0154465	HLA-DRB1/SOX4/OXCT1/NDUFA9/SRI/RACK1/LPL/PHPT1/SMARCB1/KIF5B/VSNL1/ITGA2/UCP2/GSTP1/LGALS1/SLC29A1/HMGN3/TXN2/EIF2B3/SMARCA4/NME1/PRKAA1/HIF1A/PIM3/TGFBR2/IGF1R/TRA2B/SELENOS/GCLM/EGR1/IRS2/TXNIP/CDK16/ICAM1/KRT18/RAC1/JAGN1/XBP1/SMAD2	39
BP	GO:0031334	positive regulation of protein-containing complex assembly	48/2365	254/18862	0.00228543	0.0207373	0.0160116	GBP5/HSP90AA1/PARP1/RACK1/PSMC4/MET/HCK/LGALS3/ERCC1/ARPC5/HSPA1A/BAK1/VEGFA/DRG1/ACTR3/TP53/VCP/ARPC1B/PSMC3/SUMO1/ABI2/SNX9/BAIAP2/BAX/CLU/ARPC2/GSN/GTF2H5/PIEZO1/STMP1/NCK1/MYO1C/ARF1/FES/RHOC/BAIAP2L1/CTTN/NCKAP1/AKAP9/WASL/ICAM1/BIK/RAC1/HIP1R/ARF6/MSN/ARPC1A/CLIP1	48
BP	GO:0034614	cellular response to reactive oxygen species	33/2365	159/18862	0.00229554	0.0207978	0.0160583	HDAC2/AKR1C3/RHOB/MYB/RACK1/PCNA/MET/JUN/BNIP3/PRDX2/FXN/ZNF580/TRAP1/APEX1/PDCD10/MAPK8/EZH2/SOD1/NFE2L2/AKT1/PRKAA1/PLEKHA1/OSER1/PYCR1/TPM1/ROMO1/NET1/PRDX5/PRDX1/ANXA1/MAPK3/PXN/NQO1	33
BP	GO:0060070	canonical Wnt signaling pathway	60/2365	333/18862	0.00231324	0.0209267	0.0161578	PSMB9/PSMB1/SOX4/PSMB8/PSMA4/MAD2L2/SOX2/PSMC4/PSMA7/IGFBP2/IGFBP4/CAV1/PSME2/PLEKHA4/PSME1/PSMD14/SDC1/PSMA5/SOX9/PSMB2/HDAC1/PSMA3/PSMD8/CTHRC1/RUVBL2/RUVBL1/CSNK1A1/VCP/MESP1/PSMD1/PSMD7/DDIT3/RSPO3/PSMD4/PSMA1/PSMD11/GID8/PPP1CA/YAP1/PSMC3/PSMD6/AMFR/PSMD2/FZD5/PSMD3/CTNND1/EGR1/DVL1/CSNK1E/GNAQ/XIAP/JADE1/TLE1/COL1A1/PSEN1/MDK/IFT20/CSNK1D/RAB5A/CTNNB1	60
BP	GO:0048857	neural nucleus development	16/2365	60/18862	0.00235068	0.0211701	0.0163458	BASP1/NFIB/BCL2/COX6B1/CDC42/ATP5PB/YWHAQ/RAD1/CALM2/CNP/NDUFS3/CALM3/YWHAE/SEC16A/G6PD/HSPA5	16
BP	GO:0071384	cellular response to corticosteroid stimulus	16/2365	60/18862	0.00235068	0.0211701	0.0163458	ERRFI1/AKR1C3/HEY1/GSTP1/UBE2L3/KLF9/EDN1/SMYD3/ZFP36/HNRNPU/DDIT4/ANXA1/ATP2B1/ICAM1/ZFP36L2/NR3C1	16
BP	GO:1903078	positive regulation of protein localization to plasma membrane	16/2365	60/18862	0.00235068	0.0211701	0.0163458	AGR2/RACK1/KIF5B/RAB11A/LGALS3/ITGA3/SQSTM1/CIB1/PIK3R1/AKT1/SPTBN1/EPHA2/ARHGEF16/EZR/ARF6/RER1	16
BP	GO:0016570	histone modification	77/2365	448/18862	0.00237866	0.0213902	0.0165157	HDAC2/FBL/MUC1/MYB/SMARCB1/HAT1/EYA2/PWP1/UBE2N/MORF4L1/NOC2L/HDAC1/EPC1/ING4/MEAF6/SFPQ/NAA50/VEGFA/PRMT1/DPY30/EHMT2/KDM5B/SKP1/RUVBL2/RUVBL1/TP53/KDM1A/ACTL6A/CTBP1/GTF2B/THAP7/SMYD3/MAPK8/ASH2L/EYA3/UFL1/POLE3/EZH2/RNF168/WAC/ATG5/NSD3/USP22/SUV39H2/TAF7/HDAC3/SDR16C5/PHF20/PRKAA1/AURKA/DNMT1/NIPBL/BMI1/SETD7/PER1/RIF1/CDC73/KDM2A/CDK1/CCNB1/SET/MAPK3/RNF20/USP15/NTMT1/NSD2/JADE1/ZBTB7B/TRMT1…	77
BP	GO:0070227	lymphocyte apoptotic process	18/2365	71/18862	0.00239621	0.021516	0.0166128	RPS6/CD74/LGALS9/IDO1/ADA/LGALS3/NOC2L/BAK1/ZC3H8/TP53/ADAM8/AKT1/BAX/HIF1A/TSC22D3/CRKL/IRS2/TNFRSF21	18
BP	GO:0034644	cellular response to UV	21/2365	88/18862	0.00245105	0.0219757	0.0169678	NPM1/TIMP1/PARP1/CRIP1/PTN/PCNA/RPL26/OPN3/ERCC1/NOC2L/BAK1/PIK3R1/RUVBL2/TP53/KDM1A/HYAL1/SDE2/BAX/MYC/DHX36/HYAL2	21
BP	GO:0071478	cellular response to radiation	38/2365	191/18862	0.00249302	0.0223188	0.0172327	IFI16/NPM1/TIMP1/PARP1/XRCC5/RHOB/CRIP1/PTN/PCNA/RPL26/NUCKS1/OPN3/ERCC1/EEF1D/NOC2L/RAD1/BAK1/PIK3R1/METAP2/RUVBL2/TP53/KDM1A/RAD51AP1/HYAL1/ITGB6/SDE2/YAP1/BAX/MYC/GTF2H5/NIPBL/NET1/DHX36/SWI5/EGR1/TNKS1BP1/HYAL2/HSPA5	38
BP	GO:0071385	cellular response to glucocorticoid stimulus	15/2365	55/18862	0.00250419	0.0223856	0.0172843	ERRFI1/HEY1/GSTP1/UBE2L3/KLF9/EDN1/SMYD3/ZFP36/HNRNPU/DDIT4/ANXA1/ATP2B1/ICAM1/ZFP36L2/NR3C1	15
BP	GO:0007548	sex differentiation	49/2365	262/18862	0.00258142	0.023016	0.017771	NUPR1/TESC/AKR1C3/SYCP2/TNFSF10/BASP1/TBX3/BCL2/NKX3-1/PBX1/DMRT2/NASP/SDC1/CSDE1/MSH2/TGFBR1/SOX9/ERCC1/COL9A3/FSTL3/BAK1/HSD17B4/VEGFA/TFAP2C/RRM1/ADAM15/YBX3/ANG/SOD1/EREG/BAX/PLEKHA1/CEBPB/NIPBL/FLNA/NCOA4/CRKL/EIF2S2/HMGB2/MMP14/PRDX4/IMMP2L/RAB13/ICAM1/BIK/MGST1/PTPN11/CCND1/HSPA5	49
BP	GO:0048872	homeostasis of number of cells	47/2365	249/18862	0.00258233	0.023016	0.017771	STAT1/RPS6/RPS19/ISG15/CD74/LGALS9/SOX4/RPS14/B2M/MAFB/BCL2/FH/HMGB1/ADA/EPAS1/SOX9/ATP5IF1/HSPA9/HSPA1A/PRDX2/BAK1/CEBPG/ZC3H8/VEGFA/PRMT1/SLC7A11/FAM210B/SMAP1/UFL1/EZH2/ZFP36/GBA/UBA5/SOD1/TCIRG1/FOXO3/AKT1/BAX/HIF1A/MAEA/TSC22D3/ANXA1/HMGB2/NCSTN/RAC3/G6PD/PTPN11	47
BP	GO:1903076	regulation of protein localization to plasma membrane	23/2365	100/18862	0.00261645	0.0231982	0.0179117	GBP1/AGR2/RACK1/KIF5B/RAB11A/LGALS3/ITGA3/SQSTM1/CIB1/PIK3R1/TMBIM1/AP2M1/PICALM/CLTC/AKT1/SPTBN1/EPHA2/ARHGEF16/MMP14/EZR/ARF6/RER1/VTI1B	23
BP	GO:0061842	microtubule organizing center localization	10/2365	30/18862	0.00261816	0.0231982	0.0179117	KIF5B/ARPC5/INTS13/MISP/DYNC1LI2/AURKA/SYNE2/EZR/AKAP9/IFT20	10
BP	GO:1902235	regulation of endoplasmic reticulum stress-induced intrinsic apoptotic signaling pathway	10/2365	30/18862	0.00261816	0.0231982	0.0179117	RNF183/HSPA1A/ERP29/DDIT3/SELENOS/NCK1/TMBIM6/MAGEA3/XBP1/TXNDC12	10
BP	GO:1902751	positive regulation of cell cycle G2/M phase transition	10/2365	30/18862	0.00261816	0.0231982	0.0179117	NPM1/CDK4/PBX1/VPS4B/RAB11A/FBXO5/CDC25B/CDK1/CCNB1/CCND1	10
BP	GO:0045137	development of primary sexual characteristics	42/2365	217/18862	0.00263099	0.0232777	0.0179731	NUPR1/TESC/AKR1C3/TNFSF10/BASP1/BCL2/NKX3-1/NASP/SDC1/CSDE1/MSH2/TGFBR1/SOX9/ERCC1/COL9A3/FSTL3/HSD17B4/VEGFA/TFAP2C/RRM1/ADAM15/YBX3/ANG/SOD1/EREG/BAX/PLEKHA1/CEBPB/FLNA/NCOA4/CRKL/EIF2S2/HMGB2/MMP14/PRDX4/IMMP2L/RAB13/ICAM1/BIK/MGST1/CCND1/HSPA5	42
BP	GO:0000077	DNA damage checkpoint	31/2365	148/18862	0.00263946	0.0233185	0.0180046	MUC1/SOX4/TFDP2/SFN/NOP53/PCNA/BTG2/RPL26/CDC5L/MSH2/RAD1/PML/PRMT1/TP53/CNOT7/SYF2/WAC/BABAM2/PRPF19/BAX/AURKA/TIPRL/CNOT2/CDK1/CCNB1/ARID3A/TNKS1BP1/MDM4/CNOT11/PTPN11/CCND1	31
BP	GO:0007249	I-kappaB kinase/NF-kappaB signaling	52/2365	282/18862	0.00265735	0.0234422	0.0181001	STAT1/CD74/HLA-DRB1/RPS27A/LGALS9/HSPB1/TNFSF10/LTF/TRIM22/HACD3/OPTN/APOL3/ANGPT1/BIRC3/UBE2N/S100A13/EEF1D/HDAC1/SQSTM1/GSTP1/TMED4/ATP2C1/LGALS1/TNIP1/UFL1/TRIM38/BST2/NUP62/AKT1/S100A4/INAVA/FLNA/DHX36/PER1/TGM2/TNIP2/RHOC/PRDX4/SHISA5/TRADD/SLC44A2/TLE1/CANT1/MIB2/NFKBIA/RIOK3/SLC35B2/TSPAN6/AKAP13/RBCK1/TRAF4/TNFRSF1A	52
BP	GO:0009896	positive regulation of catabolic process	77/2365	450/18862	0.0026829	0.023633	0.0182474	NUPR1/HSP90AA1/TRIM22/OPTN/RACK1/NOP53/PSMC4/CAV1/BTG2/FURIN/HMGB1/ADAM9/CD81/YTHDF2/RDX/SOX9/ATP5IF1/BNIP3/HSPA1A/VPS28/OAZ2/PTTG1IP/DAPK1/HNRNPR/VDAC1/PHB2/CSNK1A1/VCP/GNAI3/BARD1/CNOT7/POLR2G/UFL1/TRIM38/ZFP36/GBA/LPCAT1/IRS1/WAC/NUB1/C4BPB/PSMC3/SUMO1/SNX9/ADAM8/NRDC/NFE2L2/CSNK2A1/FOXO3/AKT1/BAX/CLU/PRKAA1/WWP1/SMURF1/AURKA/HIF1A/OAZ1/TMEM259/DHX36/PNPT1/CELF1/DVL1/IRS2/MAPK3/CSNK1E/PNPLA2/E…	77
BP	GO:0006123	mitochondrial electron transport, cytochrome c to oxygen	8/2365	21/18862	0.00270302	0.0237409	0.0183307	COX6B1/COX5A/NDUFA4/COX7A2L/COX5B/COX7B/COX7C/COX6A1	8
BP	GO:0019646	aerobic electron transport chain	8/2365	21/18862	0.00270302	0.0237409	0.0183307	COX6B1/COX5A/NDUFA4/COX7A2L/COX5B/COX7B/COX7C/COX6A1	8
BP	GO:0045931	positive regulation of mitotic cell cycle	26/2365	118/18862	0.00272147	0.0238683	0.0184291	CDK4/NKX3-1/PBX1/EIF4EBP1/CCDC57/VPS4B/RDX/RAB11A/PHB2/FBXO5/PLCB1/APEX1/CDC25B/HYAL1/PLRG1/USP22/ANAPC11/AKT1/LGMN/HES1/ANXA1/CDK1/CCNB1/PTPN11/CCND1/CCND3	26
BP	GO:0033047	regulation of mitotic sister chromatid segregation	13/2365	45/18862	0.00273789	0.0239774	0.0185133	MAD2L2/IK/DUSP1/BUB3/FBXO5/TTK/PTTG1/TPR/HNRNPU/CENPF/RAD21/CCNB1/CDC20	13
BP	GO:0001825	blastocyst formation	11/2365	35/18862	0.00275595	0.0240657	0.0185815	FURIN/ADA/HOPX/PTPN18/ACTL6A/YAP1/RPL7L1/BYSL/CNOT2/JUNB/RRP7A	11
BP	GO:0060236	regulation of mitotic spindle organization	11/2365	35/18862	0.00275595	0.0240657	0.0185815	RAE1/VPS4B/HSPA1A/DRG1/TPR/HNRNPU/NUP62/CLTC/TPX2/CHMP1B/CHMP4C	11
BP	GO:0071634	regulation of transforming growth factor beta production	12/2365	40/18862	0.00278548	0.0242885	0.0187535	HSP90AB1/LGALS9/MYB/FURIN/CD24/TSKU/ITGB6/ITGAV/LAPTM4B/HIF1A/CD2AP/CD46	12
BP	GO:0001819	positive regulation of cytokine production	75/2365	437/18862	0.00279141	0.024305	0.0187663	IFI16/STAT1/PAEP/GAPDH/CD74/HDAC2/HLA-DPA1/F3/LGALS9/GBP5/HLA-DPB1/HSPD1/HSP90AA1/IDO1/HSPB1/B2M/XRCC5/DDX58/IRF1/EIF2AK2/IFIH1/MYB/LPL/FURIN/HMGB1/HLA-E/CD81/C3/CGAS/ARHGEF2/SLC7A5/HSPA1A/CEBPG/POLR2L/PIK3R1/ZNF580/AGPAT2/DDT/PLCB1/DDIT3/SOD1/ADAM8/EREG/CLU/SPTBN1/HIF1A/HLA-F/SLC11A1/CEBPB/STMP1/INAVA/FZD5/DHX36/ANXA1/EGR1/MAPKAPK2/HMGB2/CYBA/IL6ST/HYAL2/HLA-A/MIF/PSEN1/MDK/TUSC2/SELENOK/RUNX1/R…	75
BP	GO:0033619	membrane protein proteolysis	16/2365	61/18862	0.00282225	0.0244676	0.0188918	TIMP1/FURIN/ADAM9/RBMX/BACE2/TIMP2/NAPSA/DAG1/SNX9/ADAM8/NRDC/APH1A/PSEN1/NCSTN/SPPL2A/HM13	16
BP	GO:0046824	positive regulation of nucleocytoplasmic transport	16/2365	61/18862	0.00282225	0.0244676	0.0188918	HSP90AB1/SFN/RAN/KHDRBS1/RBM22/PIK3R1/TP53/CDH1/YWHAE/TPR/CPSF6/HDAC3/NCBP2/FLNA/HYAL2/PSEN1	16
BP	GO:0070542	response to fatty acid	16/2365	61/18862	0.00282225	0.0244676	0.0188918	AKR1C2/AKR1C3/XRCC5/CDK4/LPL/SOX9/UCP2/AKR1C1/EDN1/ID3/IRS1/NME1/CLDN1/FOXO3/SCD/CCNB1	16
BP	GO:0033627	cell adhesion mediated by integrin	18/2365	72/18862	0.00282757	0.0244779	0.0188998	MUC1/TESC/ADAM9/IFT74/ADA/PLAU/ITGB2/ITGA2/CIB1/ITGB4/ITGB6/ITGAV/EPHA2/PIEZO1/CRKL/ICAM1/RAC3/PTPN11	18
BP	GO:2000058	regulation of ubiquitin-dependent protein catabolic process	33/2365	161/18862	0.00283155	0.0244779	0.0188998	RPL5/HSP90AB1/RPL11/RACK1/NOP53/CAV1/RPS7/SDCBP/SMARCC1/DESI1/HSPA1A/PML/CSNK1A1/VCP/UFL1/PDCL3/GBA/WAC/NUB1/SUMO1/NFE2L2/CSNK2A1/AKT1/CLU/SMURF1/AURKA/UBXN1/DVL1/CSNK1E/CDC20/PSEN1/CSNK1D/BCAP31	33
BP	GO:0002697	regulation of immune effector process	79/2365	465/18862	0.00289719	0.0250095	0.0193102	STAT1/HLA-B/HLA-DRA/AZGP1/RPS19/CD74/HLA-DRB1/LGALS9/HSPD1/HSP90AA1/MAD2L2/B2M/DDX58/PARP9/SERPING1/MYB/C2/KLK5/ANGPT1/CD55/HMGB1/HLA-E/IFIT1/C8G/EXOSC3/CD81/MSH2/C3/LGALS3/ITGB2/CGAS/HLA-DMB/SLC7A5/SERPINB4/CEACAM1/PROS1/CFH/LAMP1/SNX4/APOBEC3G/C1QBP/GPI/CFI/NPLOC4/C4BPB/HMCES/BST2/DDX60/ATG5/CLCF1/CLU/HLA-F/PVR/IGHG4/FZD5/DHX36/C1R/RIF1/IGKC/ANXA1/FES/TMBIM6/NECTIN2/NSD2/HLA-A/ZBTB7B/ICAM1/CD59…	79
BP	GO:0050851	antigen receptor-mediated signaling pathway	58/2365	323/18862	0.00292476	0.0252114	0.0194661	GBP1/HLA-DRA/PSMB9/HLA-DRB1/HLA-DPA1/PSMB1/HLA-DPB1/PSMB8/PSMA4/BCL2/PSMC4/PSMA7/PHPT1/PSME2/PSME1/ADA/PSMD14/KHDRBS1/CD81/PSMA5/STOML2/LGALS3/PSMB2/UBE2N/HLA-DQB1/PSMA3/PSMD8/CEACAM1/SKP1/PIK3R1/PSMD1/PSMD7/PSMD4/EIF2B3/PSMA1/PSMD11/PSMC3/BAX/PSMD6/PLEKHA1/PSMD2/SPG21/IGHG4/BTN3A2/CRKL/IGKC/NCK1/PSMD3/ELF1/NECTIN2/EZR/TNFRSF21/HLA-A/PSEN1/IGHA1/RUNX1/IGLC2/RBCK1	58
BP	GO:0006750	glutathione biosynthetic process	7/2365	17/18862	0.00298356	0.0255722	0.0197447	GCLC/SLC7A11/NFE2L2/MGST2/GGCT/CNDP2/GCLM	7
BP	GO:0042790	nucleolar large rRNA transcription by RNA polymerase I	7/2365	17/18862	0.00298356	0.0255722	0.0197447	NOP53/SMARCB1/PWP1/POLR1E/NCL/SMARCA4/SIRT7	7
BP	GO:0043968	histone H2A acetylation	7/2365	17/18862	0.00298356	0.0255722	0.0197447	MORF4L1/EPC1/MEAF6/RUVBL2/RUVBL1/ACTL6A/MORF4L2	7
BP	GO:1902165	regulation of intrinsic apoptotic signaling pathway in response to DNA damage by p53 class mediator	7/2365	17/18862	0.00298356	0.0255722	0.0197447	CD74/MUC1/BCL2/RPL26/KDM1A/HNRNPK/MIF	7
BP	GO:2000379	positive regulation of reactive oxygen species metabolic process	23/2365	101/18862	0.00299426	0.0256274	0.0197873	HSP90AB1/HSP90AA1/AKR1C3/ITGB2/GSTP1/TP53/GNAI3/EDN1/SOD1/NFE2L2/AKT1/CLU/TGFBR2/ROMO1/DDAH2/HBB/P2RX4/CLCN3/CYBA/ICAM1/TSPO/SLC5A3/NQO2	23
BP	GO:0048875	chemical homeostasis within a tissue	6/2365	13/18862	0.00301663	0.0257095	0.0198507	EPAS1/VEGFA/ITGB6/LPCAT1/NAPSA/RCN3	6
BP	GO:0060576	intestinal epithelial cell development	6/2365	13/18862	0.00301663	0.0257095	0.0198507	KLF5/YAP1/TYMS/HIF1A/IL6ST/YIPF6	6
BP	GO:0071635	negative regulation of transforming growth factor beta production	6/2365	13/18862	0.00301663	0.0257095	0.0198507	HSP90AB1/FURIN/CD24/TSKU/LAPTM4B/CD2AP	6
BP	GO:0006754	ATP biosynthetic process	15/2365	56/18862	0.0030309	0.0257584	0.0198884	ATP5F1C/PARP1/TMSB4X/ENO1/ATP5F1B/ATP5ME/ATP5PB/STOML2/ATP5MC3/ATP5F1A/VCP/AK4/ALDOA/ATP6V1A/ATP5MG	15
BP	GO:0007007	inner mitochondrial membrane organization	15/2365	56/18862	0.0030309	0.0257584	0.0198884	ATP5F1C/ATP5F1B/ATP5ME/IMMT/ATP5PB/CHCHD10/ATP5MC3/TMEM11/HSPA9/ATP5F1A/TIMM10/ROMO1/TIMM8B/ATP5MG/SPG7	15
BP	GO:0031331	positive regulation of cellular catabolic process	67/2365	384/18862	0.00303819	0.025784	0.0199082	NUPR1/HSP90AA1/TRIM22/OPTN/RACK1/NOP53/PSMC4/CAV1/BTG2/FURIN/HMGB1/ADAM9/CD81/YTHDF2/RDX/ATP5IF1/BNIP3/HSPA1A/PTTG1IP/DAPK1/HNRNPR/VDAC1/PHB2/CSNK1A1/VCP/GNAI3/CNOT7/POLR2G/UFL1/TRIM38/ZFP36/GBA/IRS1/WAC/NUB1/PSMC3/SUMO1/SNX9/ADAM8/NRDC/NFE2L2/FOXO3/AKT1/BAX/CLU/PRKAA1/SMURF1/AURKA/HIF1A/TMEM259/DHX36/PNPT1/CELF1/DVL1/IRS2/MAPK3/CSNK1E/PNPLA2/EZR/CDC20/SCOC/ZFP36L2/PSEN1/TOB1/CSNK1D/MSN/BCAP31	67
BP	GO:0006406	mRNA export from nucleus	25/2365	113/18862	0.0030661	0.0259479	0.0200348	EIF5A/SRRM1/SRSF3/RAE1/ALKBH5/CDC40/MAGOH/MAGOHB/SRSF7/SLU7/TPR/SRSF2/NUP62/DDX39A/NCBP2/RBM8A/UPF2/SRSF4/HNRNPA2B1/SRSF11/FYTTD1/AGFG1/THOC6/SEC13/SLBP	25
BP	GO:0071427	mRNA-containing ribonucleoprotein complex export from nucleus	25/2365	113/18862	0.0030661	0.0259479	0.0200348	EIF5A/SRRM1/SRSF3/RAE1/ALKBH5/CDC40/MAGOH/MAGOHB/SRSF7/SLU7/TPR/SRSF2/NUP62/DDX39A/NCBP2/RBM8A/UPF2/SRSF4/HNRNPA2B1/SRSF11/FYTTD1/AGFG1/THOC6/SEC13/SLBP	25
BP	GO:0001101	response to acid chemical	26/2365	119/18862	0.00307577	0.0259933	0.0200698	BCL11A/PTN/PCNA/RRAGD/RRAGA/COL6A1/SIX1/VEGFA/TOMM20/GSTP1/EDN1/UFL1/CEBPB/KRT8/SIPA1/GCLM/LAMTOR3/TMBIM6/LAMTOR4/LAMTOR1/COL1A1/ICAM1/LAMTOR2/CAPN2/NQO1/XBP1	26
BP	GO:0010464	regulation of mesenchymal cell proliferation	9/2365	26/18862	0.00318039	0.0267276	0.0206368	STAT1/NFIB/PTN/SIX1/SOX9/VEGFA/MYC/TGFBR2/IRS2	9
BP	GO:0022616	DNA strand elongation	9/2365	26/18862	0.00318039	0.0267276	0.0206368	PCNA/NUCKS1/GINS2/MCM7/MCM3/LIG1/POLE3/RFC4/RFC3	9
BP	GO:0031342	negative regulation of cell killing	9/2365	26/18862	0.00318039	0.0267276	0.0206368	HLA-B/HSP90AB1/LGALS9/HLA-E/SERPINB4/CEACAM1/KRT6A/HLA-F/HLA-A	9
BP	GO:0033561	regulation of water loss via skin	9/2365	26/18862	0.00318039	0.0267276	0.0206368	STMN1/SFN/MET/GBA/CLDN1/CLDN4/FA2H/ELOVL1/KRT16	9
BP	GO:0031570	DNA integrity checkpoint	32/2365	156/18862	0.00320752	0.0269182	0.0207839	MUC1/SOX4/TFDP2/SFN/NOP53/PCNA/BTG2/RPL26/CDC5L/NAE1/MSH2/RAD1/PML/PRMT1/TP53/CNOT7/SYF2/WAC/BABAM2/PRPF19/BAX/AURKA/TIPRL/CNOT2/CDK1/CCNB1/ARID3A/TNKS1BP1/MDM4/CNOT11/PTPN11/CCND1	32
BP	GO:0032868	response to insulin	51/2365	278/18862	0.00323327	0.0270966	0.0209217	ERRFI1/PARP1/TNFSF10/CDK4/PIK3R3/LPL/CAV2/SLC25A33/INSIG1/NUCKS1/SLC2A1/SMARCC1/UCP2/PHIP/CEACAM1/GSTP1/PIK3R1/LPIN1/IRS1/ATP6V1F/GGH/BAIAP2/TCIRG1/ATP6V1G1/AKT1/PRKAA1/ATP6V1B2/SRSF4/IGF1R/SELENOS/NCK1/ADM/MYO1C/EGR1/IRS2/SHC1/ATP2B1/BAIAP2L1/ATP6V1A/APRT/RAB13/ZBTB7B/ICAM1/LPIN2/YWHAG/USO1/PTPN11/XBP1/ATP6V1E1/ATP6AP1/CCND3	51
BP	GO:0070301	cellular response to hydrogen peroxide	21/2365	90/18862	0.00327163	0.0273474	0.0211154	HDAC2/RHOB/MYB/RACK1/PCNA/MET/BNIP3/FXN/ZNF580/TRAP1/APEX1/PDCD10/EZH2/NFE2L2/PRKAA1/PLEKHA1/OSER1/PYCR1/NET1/ANXA1/NQO1	21
BP	GO:1903364	positive regulation of cellular protein catabolic process	31/2365	150/18862	0.00327227	0.0273474	0.0211154	NUPR1/HSP90AA1/RACK1/NOP53/PSMC4/CAV1/CD81/RDX/ATP5IF1/HSPA1A/PTTG1IP/CSNK1A1/VCP/GBA/NUB1/PSMC3/SUMO1/NFE2L2/AKT1/CLU/SMURF1/AURKA/TMEM259/DVL1/CSNK1E/EZR/CDC20/PSEN1/CSNK1D/MSN/BCAP31	31
BP	GO:0002429	immune response-activating cell surface receptor signaling pathway	81/2365	481/18862	0.0032951	0.0274622	0.021204	GBP1/HLA-DRA/PSMB9/HSP90AB1/HLA-DRB1/HLA-DPA1/PSMB1/HLA-DPB1/MUC1/HSP90AA1/PSMB8/PSMA4/PLSCR1/BCL2/MUCL1/PSMC4/PSMA7/PHPT1/CDC42/PSME2/MUC4/PSME1/ADA/PSMD14/MUC16/KHDRBS1/CD81/PSMA5/HCK/STOML2/LGALS3/PSMB2/ARPC5/UBE2N/HLA-DQB1/PSMA3/PSMD8/CEACAM1/SKP1/PIK3R1/ACTR3/PSMD1/PSMD7/PSMD4/EIF2B3/PSMA1/PSMD11/ARPC1B/PSMC3/BAIAP2/BAX/PSMD6/ARPC2/PLEKHA1/VAV2/PSMD2/SPG21/IGHG4/BTN3A2/ABI1/CRKL/IGKC/NCK1/PS…	81
BP	GO:0002757	immune response-activating signal transduction	81/2365	481/18862	0.0032951	0.0274622	0.021204	GBP1/HLA-DRA/PSMB9/HSP90AB1/HLA-DRB1/HLA-DPA1/PSMB1/HLA-DPB1/MUC1/HSP90AA1/PSMB8/PSMA4/PLSCR1/BCL2/MUCL1/PSMC4/PSMA7/PHPT1/CDC42/PSME2/MUC4/PSME1/ADA/PSMD14/MUC16/KHDRBS1/CD81/PSMA5/HCK/STOML2/LGALS3/PSMB2/ARPC5/UBE2N/HLA-DQB1/PSMA3/PSMD8/CEACAM1/SKP1/PIK3R1/ACTR3/PSMD1/PSMD7/PSMD4/EIF2B3/PSMA1/PSMD11/ARPC1B/PSMC3/BAIAP2/BAX/PSMD6/ARPC2/PLEKHA1/VAV2/PSMD2/SPG21/IGHG4/BTN3A2/ABI1/CRKL/IGKC/NCK1/PS…	81
BP	GO:0042246	tissue regeneration	18/2365	73/18862	0.00332172	0.0276459	0.0213458	SOX2/PTN/CD9/KLK6/APOD/CD81/KLF5/ADAM15/PTPN12/EZH2/YAP1/DAG1/GSN/TGFBR2/ANXA1/CCNB1/MDK/RUNX1	18
BP	GO:0001889	liver development	29/2365	138/18862	0.00338088	0.0280995	0.0216961	PTN/PCNA/ADA/PROX1/MET/SOX9/CEBPG/ITGA2/UCP2/CEACAM1/MESP1/AK4/SEC63/EZH2/HPN/CLDN1/TYMS/UPF2/AURKA/CEBPB/PNPT1/HES1/ANXA1/MDK/KRT18/ARF6/GFER/CCND1/XBP1	29
BP	GO:0009260	ribonucleotide biosynthetic process	37/2365	188/18862	0.00340922	0.0282961	0.0218478	ATP5F1C/PARP1/GMPS/AK2/TMSB4X/ENO1/ATP5F1B/ATP5ME/AK3/ATP5PB/STOML2/ATP5MC3/UPP1/CTPS1/ATP5F1A/VCP/SLC25A1/UMPS/AK4/NME7/ATIC/PAPSS1/NME1/ALDOA/PDK1/PAICS/PDHX/RFK/PRPS2/HSD17B8/SCD/ATP6V1A/ELOVL1/APRT/NME3/ATP5MG/SLC35B2	37
BP	GO:0043200	response to amino acid	23/2365	102/18862	0.00341697	0.0283214	0.0218674	BCL11A/PTN/PCNA/RRAGD/RRAGA/COL6A1/SIX1/TOMM20/GSTP1/EDN1/UFL1/CEBPB/GCLM/LAMTOR3/TMBIM6/LAMTOR4/LAMTOR1/COL1A1/ICAM1/LAMTOR2/CAPN2/NQO1/XBP1	23
BP	GO:0032273	positive regulation of protein polymerization	28/2365	132/18862	0.00342184	0.0283229	0.0218686	HSP90AA1/MET/HCK/ARPC5/HSPA1A/DRG1/ACTR3/ARPC1B/ABI2/SNX9/BAIAP2/ARPC2/GSN/NCK1/MYO1C/ARF1/FES/BAIAP2L1/CTTN/NCKAP1/AKAP9/WASL/ICAM1/RAC1/HIP1R/ARF6/ARPC1A/CLIP1	28
BP	GO:0097305	response to alcohol	44/2365	233/18862	0.00343338	0.0283295	0.0218737	HDAC2/AKR1C2/AKR1C3/PARP1/OXCT1/HPGD/CDK4/RPL15/EIF4EBP1/CES1/PSMD14/TGFBR1/BAK1/GSTP1/S100A8/ADAM15/CDH1/CALM3/KLF9/AHR/GGH/DAG1/SOD1/CLDN1/AKT1/TYMS/PRKAA1/GSN/TGFBR2/CLDN7/SETD7/EEF2/ATP2B1/FDX1/FOSB/ICAM1/GLB1/G6PD/NQO1/PMVK/GOLPH3/CCND1/CTNNB1/SMAD2	44
BP	GO:0002347	response to tumor cell	10/2365	31/18862	0.00343673	0.0283295	0.0218737	HLA-DRB1/HSPD1/HMGB1/CEACAM1/ADAM15/PVR/NECTIN2/TXNIP/HNMT/HLA-A	10
BP	GO:0032509	endosome transport via multivesicular body sorting pathway	10/2365	31/18862	0.00343673	0.0283295	0.0218737	VPS4B/VPS28/VCP/VTA1/LAPTM4B/TMEM50B/UBXN6/CHMP1B/LEPROT/CHMP4C	10
BP	GO:0006289	nucleotide-excision repair	24/2365	108/18862	0.0034535	0.0284289	0.0219504	RPS27A/PARP1/PCNA/HMGB1/ERCC1/POLR2L/TP53/POLR2I/HMGN1/POLR2G/CCNH/LIG1/ISY1/POLD4/COPS3/RFC4/UVSSA/PRPF19/RFC1/GTF2H5/RFC3/NTHL1/COPS6/POLR2J	24
BP	GO:0032392	DNA geometric change	25/2365	114/18862	0.00346975	0.0285238	0.0220237	RPS27A/PARP1/XRCC5/HMGA1/HMGB1/CHD6/MCM6/RUVBL2/RUVBL1/TP53/G3BP1/MCM7/HMGB3/MCM3/MCM2/MCM5/RFC4/GTF2H5/HNRNPA2B1/RFC3/DHX36/RECQL/ANXA1/HMGB2/TOP2A	25
BP	GO:1900034	regulation of cellular response to heat	19/2365	79/18862	0.00350631	0.028746	0.0221953	HSP90AB1/HSP90AA1/FKBP4/HSPH1/RAE1/DNAJC7/HSBP1/HSPA1A/PTGES3/YWHAE/HSPA8/TPR/NUP62/DNAJB1/IER5/MAPKAPK2/CHORDC1/MAPK3/SEC13	19
BP	GO:1990830	cellular response to leukemia inhibitory factor	19/2365	79/18862	0.00350631	0.028746	0.0221953	SHMT1/XRCC5/CACYBP/SRSF3/SRSF7/MRAS/PML/BCLAF1/KDM5B/KLF5/SLC25A5/PDCD10/EIF4A2/HNRNPU/PFKP/RIF1/GCLM/ICAM1/PMM1	19
BP	GO:0045730	respiratory burst	11/2365	36/18862	0.00352585	0.028867	0.0222887	RPS19/CD55/HCK/CD24/PRDX2/SLC11A1/CYBA/IGHA1/GRN/SELENOK/RAC1	11
BP	GO:0007599	hemostasis	61/2365	346/18862	0.00357134	0.0291603	0.0225151	HDAC2/FGB/F3/FGG/FGA/HSPB1/TFPI/IRF1/PLSCR1/SERPING1/SERPINA1/CD9/CAV1/CDC42/TSPAN8/AK3/PLAU/HDAC1/PRDX2/ITGA2/MAFK/CEACAM1/PIK3R1/SLC7A11/PROS1/KDM1A/DTNBP1/YWHAZ/MYL12A/PRCP/EDN1/C1QBP/GPI/CLIC1/C4BPB/PROCR/CAPZB/NFE2L2/VAV2/ANXA5/MAFG/HBB/ST3GAL4/FLNA/P2RX4/CAPZA1/MAPK3/GNAQ/COL1A1/CD59/PPIA/PABPC4/LMAN1/VKORC1/F11R/RAC1/C1GALT1C1/PTPN11/RAB5A/PLAUR/SAA1	61
BP	GO:0010639	negative regulation of organelle organization	61/2365	346/18862	0.00357134	0.0291603	0.0225151	STMN1/NUPR1/NPM1/PARP1/TACSTD2/FKBP4/MAD2L2/HNRNPA1/IK/TMSB4X/DUSP1/MET/RDX/ERCC1/ARHGEF2/BNIP3/RAD1/HSPA1A/NAA10/SVIL/BUB3/CIB1/PIK3R1/FXN/TP53/SLC25A5/FBXO5/HNRNPC/TTK/SSH3/MCM2/PTTG1/TPR/YAP1/NBDY/HNRNPU/CAPZB/MAP2/TJP1/AKT1/CLU/SPTBN1/GSN/AURKAIP1/CENPF/ADD3/RAD21/CAPZA1/CCNB1/NOL3/FLII/LIMA1/STYXL1/CDC20/SPTAN1/TPX2/F11R/TSPO/HIP1R/TOP2A/VAT1	61
BP	GO:0031333	negative regulation of protein-containing complex assembly	29/2365	139/18862	0.00377191	0.0307564	0.0237475	STMN1/RPL13A/FKBP4/NOP53/TMSB4X/EIF4EBP1/CDC42/HMGB1/RDX/SOX9/SVIL/LMO4/TMC8/SSH3/DNAJC15/GBA/CAPZB/MAP2/CLU/SPTBN1/GSN/ADD3/CLDN7/CAPZA1/FLII/SPTAN1/HIP1R/RIOK3/HSPA5	29
BP	GO:0042776	mitochondrial ATP synthesis coupled proton transport	8/2365	22/18862	0.00378612	0.030789	0.0237727	ATP5F1C/ATP5F1B/ATP5ME/ATP5PB/STOML2/ATP5MC3/ATP5F1A/ATP5MG	8
BP	GO:0070987	error-free translesion synthesis	8/2365	22/18862	0.00378612	0.030789	0.0237727	RPS27A/PCNA/VCP/NPLOC4/RFC4/RFC1/RFC3/UFD1	8
BP	GO:0050817	coagulation	61/2365	347/18862	0.00381588	0.0309893	0.0239273	HDAC2/FGB/F3/FGG/FGA/HSPB1/TFPI/IRF1/PLSCR1/SERPING1/SERPINA1/CD9/CAV1/CDC42/TSPAN8/AK3/PLAU/HDAC1/PRDX2/ITGA2/MAFK/CEACAM1/PIK3R1/SLC7A11/PROS1/KDM1A/DTNBP1/YWHAZ/MYL12A/PRCP/EDN1/C1QBP/CLIC1/C4BPB/PROCR/CAPZB/NFE2L2/VAV2/ANXA5/MAFG/HBB/ST3GAL4/FLNA/P2RX4/CAPZA1/MAPK3/GNAQ/COL1A1/CD59/PSEN1/PPIA/PABPC4/LMAN1/VKORC1/F11R/RAC1/C1GALT1C1/PTPN11/RAB5A/PLAUR/SAA1	61
BP	GO:0050729	positive regulation of inflammatory response	28/2365	133/18862	0.0038274	0.031041	0.0239673	NUPR1/RPS19/IDO1/LPL/HLA-E/CD81/C3/ITGA2/NMI/S100A8/DDT/TNIP1/SNX4/PDCD4/ADAM8/MGST2/OSMR/CEBPB/TGM2/TRADD/IL6ST/HYAL2/MDK/NEAT1/GRN/S100A9/NFKBIA/TNFRSF1A	28
BP	GO:0000070	mitotic sister chromatid segregation	33/2365	164/18862	0.00383461	0.0310577	0.0239802	MAD2L2/SMC2/RAN/IK/VPS4B/DUSP1/RAB11A/NUDC/NAA10/BUB3/NAA50/SMC4/BOD1/FBXO5/TTK/PTTG1/TPR/HNRNPU/NUP62/ANAPC11/CENPF/NIPBL/KIF2C/RAD21/CCNB1/NUF2/CDC20/NUSAP1/CHMP1B/RMDN1/CDC26/CHMP4C/SMC5	33
BP	GO:1903050	regulation of proteolysis involved in cellular protein catabolic process	41/2365	215/18862	0.00386284	0.0312445	0.0241244	RPL5/NUPR1/HSP90AB1/RPL11/RACK1/NOP53/PSMC4/CAV1/PSME2/RPS7/PSME1/PSMD14/SDCBP/SMARCC1/ATP5IF1/DESI1/HSPA1A/PML/CSNK1A1/VCP/UFL1/PDCL3/GBA/WAC/NUB1/PSMC3/SUMO1/NFE2L2/CSNK2A1/AKT1/CLU/SMURF1/AURKA/TMEM259/UBXN1/DVL1/CSNK1E/CDC20/PSEN1/CSNK1D/BCAP31	41
BP	GO:0071333	cellular response to glucose stimulus	27/2365	127/18862	0.00387157	0.0312732	0.0241465	HLA-DRB1/SOX4/OXCT1/SRI/RACK1/PHPT1/SMARCB1/KIF5B/VSNL1/UCP2/LGALS1/SLC29A1/HMGN3/SMARCA4/NME1/PRKAA1/HIF1A/PIM3/IGF1R/TRA2B/GCLM/IRS2/CDK16/ICAM1/RAC1/JAGN1/XBP1	27
BP	GO:0071260	cellular response to mechanical stimulus	18/2365	74/18862	0.00388542	0.0313273	0.0241883	CASP8AP2/IRF1/SLC2A1/SOX9/BNIP3/BAK1/ITGA2/MAPK8/DAG1/AKT1/PIEZO1/MAPK3/COL1A1/F11R/RAC1/PTPN11/CNN2/TNFRSF1A	18
BP	GO:0031532	actin cytoskeleton reorganization	23/2365	103/18862	0.00388865	0.0313273	0.0241883	PHPT1/CDC42/HCK/ATP2C1/DTNBP1/PDLIM4/BAIAP2/CDC42BPB/TJP1/GSN/FLNA/CXADR/ANXA1/FES/MKLN1/SHC1/BAIAP2L1/EZR/CTTN/ARHGDIA/MDK/F11R/CD2AP	23
BP	GO:0031103	axon regeneration	14/2365	52/18862	0.00391176	0.0313877	0.024235	SPP1/NREP/BCL2/PTN/APOD/KLK8/CHL1/STK24/DAG1/CERS2/FLNA/GRN/TSPO/PTPRF	14
BP	GO:0032210	regulation of telomere maintenance via telomerase	14/2365	52/18862	0.00391176	0.0313877	0.024235	TCP1/XRCC5/CCT2/CCT4/HNRNPA1/CCT3/CCT7/CCT5/PKIB/DKC1/HNRNPC/CCT8/HNRNPU/MAPK3	14
BP	GO:0050819	negative regulation of coagulation	14/2365	52/18862	0.00391176	0.0313877	0.024235	FGB/FGG/FGA/TFPI/SERPING1/CD9/TSPAN8/PLAU/CEACAM1/PROS1/EDN1/PROCR/ANXA5/PLAUR	14
BP	GO:0007569	cell aging	25/2365	115/18862	0.00391722	0.0313898	0.0242365	YBX1/CDKN2A/NPM1/B2M/TBX3/BCL2/ID2/CDKN2B/HMGA1/ERCC1/CGAS/PML/TP53/FBXO5/PDCD4/YPEL3/NUP62/SOD1/ROMO1/RSL1D1/PNPT1/MIF/ICAM1/LMNA/SMC5	25
BP	GO:1990823	response to leukemia inhibitory factor	19/2365	80/18862	0.00406918	0.0325642	0.0251434	SHMT1/XRCC5/CACYBP/SRSF3/SRSF7/MRAS/PML/BCLAF1/KDM5B/KLF5/SLC25A5/PDCD10/EIF4A2/HNRNPU/PFKP/RIF1/GCLM/ICAM1/PMM1	19
BP	GO:0009746	response to hexose	37/2365	190/18862	0.0040954	0.0327306	0.0252718	HLA-DRB1/SOX4/OXCT1/NDUFA9/SRI/RACK1/LPL/PHPT1/SMARCB1/KIF5B/VSNL1/UCP2/LGALS1/SLC29A1/HMGN3/TXN2/EIF2B3/SMARCA4/NME1/PRKAA1/HIF1A/PIM3/TGFBR2/IGF1R/TRA2B/SELENOS/GCLM/EGR1/IRS2/TXNIP/CDK16/ICAM1/KRT18/RAC1/JAGN1/XBP1/SMAD2	37
BP	GO:0045646	regulation of erythrocyte differentiation	13/2365	47/18862	0.00415281	0.0331456	0.0255922	STAT1/ISG15/B2M/MAFB/HSPA9/HSPA1A/PRMT1/FAM210B/SMAP1/ZFP36/FOXO3/HIF1A/HMGB2	13
BP	GO:0007589	body fluid secretion	20/2365	86/18862	0.00420926	0.0335003	0.0258661	AGR2/AQP5/CAV1/ADA/VEGFA/OAS2/SLC29A1/UMPS/EDN1/NME1/ATG5/PAM/HIF1A/NCOR2/APRT/ZBTB7B/GPAT4/DDR1/CCND1/XBP1	20
BP	GO:0000469	cleavage involved in rRNA processing	9/2365	27/18862	0.00424722	0.0335003	0.0258661	RPP40/RCL1/RPS21/EXOSC3/ERI3/NOB1/EXOSC9/EXOSC8/BMS1	9
BP	GO:0010971	positive regulation of G2/M transition of mitotic cell cycle	9/2365	27/18862	0.00424722	0.0335003	0.0258661	CDK4/PBX1/VPS4B/RAB11A/FBXO5/CDC25B/CDK1/CCNB1/CCND1	9
BP	GO:0015985	energy coupled proton transport, down electrochemical gradient	9/2365	27/18862	0.00424722	0.0335003	0.0258661	ATP5F1C/ATP5F1B/ATP5ME/ATP5PB/STOML2/ATP5MC3/ATP5F1A/ATP6V1A/ATP5MG	9
BP	GO:0015986	ATP synthesis coupled proton transport	9/2365	27/18862	0.00424722	0.0335003	0.0258661	ATP5F1C/ATP5F1B/ATP5ME/ATP5PB/STOML2/ATP5MC3/ATP5F1A/ATP6V1A/ATP5MG	9
BP	GO:0032201	telomere maintenance via semi-conservative replication	9/2365	27/18862	0.00424722	0.0335003	0.0258661	PCNA/PRIM1/POLE4/POLD4/POLE3/RFC4/RFC1/FEN1/RFC3	9
BP	GO:0035459	vesicle cargo loading	9/2365	27/18862	0.00424722	0.0335003	0.0258661	INSIG1/TMED10/SEC24D/PICALM/TMED2/SEC31A/SEC23A/MIA2/SEC13	9
BP	GO:0090200	positive regulation of release of cytochrome c from mitochondria	9/2365	27/18862	0.00424722	0.0335003	0.0258661	TNFSF10/FAM162A/PDCD5/BNIP3/BAK1/TP53/BAX/BIK/PLAUR	9
BP	GO:0140467	integrated stress response signaling	9/2365	27/18862	0.00424722	0.0335003	0.0258661	AGR2/ABCA7/DDIT3/ATF3/PPP1R15A/NFE2L2/TMED2/NCK1/HSPA5	9
BP	GO:0007596	blood coagulation	60/2365	342/18862	0.0042787	0.0336606	0.0259899	HDAC2/FGB/F3/FGG/FGA/HSPB1/TFPI/IRF1/PLSCR1/SERPING1/SERPINA1/CD9/CAV1/CDC42/TSPAN8/AK3/PLAU/HDAC1/PRDX2/ITGA2/MAFK/CEACAM1/PIK3R1/SLC7A11/PROS1/KDM1A/DTNBP1/YWHAZ/MYL12A/PRCP/EDN1/C1QBP/CLIC1/C4BPB/PROCR/CAPZB/NFE2L2/VAV2/ANXA5/MAFG/HBB/ST3GAL4/FLNA/P2RX4/CAPZA1/MAPK3/GNAQ/COL1A1/CD59/PPIA/PABPC4/LMAN1/VKORC1/F11R/RAC1/C1GALT1C1/PTPN11/RAB5A/PLAUR/SAA1	60
BP	GO:0070997	neuron death	60/2365	342/18862	0.0042787	0.0336606	0.0259899	NUPR1/GAPDH/HSP90AB1/PARP1/SNCG/MYB/BCL2/FAM162A/RACK1/ANGPT1/BTG2/CDC42/NAE1/MSH2/SIX1/JUN/ITGB2/RETREG1/BNIP3/SLC7A11/TP53/NDNF/DDIT3/CHP1/GBA/SOD1/ADAM8/CLCF1/PICALM/DDIT4/FOXO3/AKT1/BAX/CLU/HIF1A/HLA-F/CEBPB/TMEM259/CDC34/LGMN/USP53/ARL6IP5/GCLM/EGR1/SET/XIAP/TNFRSF21/PSEN1/MDK/NCSTN/GRN/ERBB3/CAPN2/EGLN3/G6PD/NQO1/DHCR24/CTNNB1/HSPA5/NQO2	60
BP	GO:0019985	translesion synthesis	12/2365	42/18862	0.00434585	0.0339834	0.0262391	UBE2L6/ISG15/RPS27A/MAD2L2/PCNA/VCP/POLD4/NPLOC4/RFC4/RFC1/RFC3/UFD1	12
BP	GO:0033046	negative regulation of sister chromatid segregation	12/2365	42/18862	0.00434585	0.0339834	0.0262391	MAD2L2/IK/DUSP1/BUB3/FBXO5/TTK/PTTG1/TPR/CENPF/RAD21/CCNB1/CDC20	12
BP	GO:0033048	negative regulation of mitotic sister chromatid segregation	12/2365	42/18862	0.00434585	0.0339834	0.0262391	MAD2L2/IK/DUSP1/BUB3/FBXO5/TTK/PTTG1/TPR/CENPF/RAD21/CCNB1/CDC20	12
BP	GO:2000816	negative regulation of mitotic sister chromatid separation	12/2365	42/18862	0.00434585	0.0339834	0.0262391	MAD2L2/IK/DUSP1/BUB3/FBXO5/TTK/PTTG1/TPR/CENPF/RAD21/CCNB1/CDC20	12
BP	GO:0031102	neuron projection regeneration	15/2365	58/18862	0.00435821	0.0339834	0.0262391	SPP1/NREP/BCL2/PTN/APOD/KLK8/CHL1/STK24/DAG1/CERS2/FLNA/ADM/GRN/TSPO/PTPRF	15
BP	GO:0045953	negative regulation of natural killer cell mediated cytotoxicity	7/2365	18/18862	0.00435915	0.0339834	0.0262391	HLA-B/LGALS9/HLA-E/SERPINB4/CEACAM1/HLA-F/HLA-A	7
BP	GO:1901673	regulation of mitotic spindle assembly	7/2365	18/18862	0.00435915	0.0339834	0.0262391	VPS4B/HSPA1A/DRG1/TPR/HNRNPU/CHMP1B/CHMP4C	7
BP	GO:0001649	osteoblast differentiation	42/2365	223/18862	0.00438915	0.0341731	0.0263856	SPP1/FBL/IGFBP3/HSPE1/LTF/SOX2/GTPBP4/ATP5F1B/RBMX/COL6A1/SYNCRIP/SOX9/HSD17B4/CTHRC1/ASF1A/FBXO5/ATRAID/HNRNPC/ID3/UFL1/YAP1/CLIC1/HNRNPU/TCIRG1/FHL2/CLTC/AKT1/EPHA2/CEBPB/DDX5/RSL1D1/JUND/PDLIM7/TPM4/IL6ST/COL1A1/TOB1/JUNB/RRBP1/SIRT7/BCAP29/ATP6AP1	42
BP	GO:0046825	regulation of protein export from nucleus	10/2365	32/18862	0.00444592	0.0344401	0.0265917	IFI27/SFN/RBM22/TP53/SP100/BARD1/YWHAE/TPR/SIRT7/PTPN11	10
BP	GO:1903902	positive regulation of viral life cycle	10/2365	32/18862	0.00444592	0.0344401	0.0265917	CD74/HLA-DRB1/LGALS9/CAV2/P4HB/VPS4B/LGALS1/TMPRSS4/TRIM38/CHMP4C	10
BP	GO:1903955	positive regulation of protein targeting to mitochondrion	10/2365	32/18862	0.00444592	0.0344401	0.0265917	SAE1/PDCD5/UBE2L3/PRKAA1/FZD5/NPEPPS/UBE2J2/TOMM7/UBL5/LEPROT	10
BP	GO:0033120	positive regulation of RNA splicing	11/2365	37/18862	0.00445856	0.0344401	0.0265917	RBMX/RBM22/HSPA1A/PIK3R1/NCL/HSPA8/THRAP3/RBMXL1/PRPF19/SNRNP70/TRA2B	11
BP	GO:0044003	modulation by symbiont of host process	11/2365	37/18862	0.00445856	0.0344401	0.0265917	EIF2AK2/RRAGA/PHB2/KPNA3/TNIP1/VAPB/ATG5/DAG1/RXRA/TYMS/HYAL2	11
BP	GO:0070897	transcription preinitiation complex assembly	11/2365	37/18862	0.00445856	0.0344401	0.0265917	PSMC4/SMARCB1/HMGB1/POLR1E/TAF11/TP53/GTF2B/SMARCA4/PSMC3/TAF7/GTF2A2	11
BP	GO:0002291	T cell activation via T cell receptor contact with antigen bound to MHC molecule on antigen presenting cell	5/2365	10/18862	0.00450335	0.0344401	0.0265917	LGALS9/CD81/LGALS3/HLA-DMB/ICAM1	5
BP	GO:0010998	regulation of translational initiation by eIF2 alpha phosphorylation	5/2365	10/18862	0.00450335	0.0344401	0.0265917	NPM1/EIF2AK2/TMED2/NCK1/DNAJC3	5
BP	GO:0018401	peptidyl-proline hydroxylation to 4-hydroxy-L-proline	5/2365	10/18862	0.00450335	0.0344401	0.0265917	ERO1A/P4HB/P4HA1/PRDX4/EGLN3	5
BP	GO:0031125	rRNA 3'-end processing	5/2365	10/18862	0.00450335	0.0344401	0.0265917	RPS21/EXOSC3/ERI3/EXOSC9/EXOSC8	5
BP	GO:0035999	tetrahydrofolate interconversion	5/2365	10/18862	0.00450335	0.0344401	0.0265917	SHMT1/MTHFD2/SHMT2/MTHFD1/TYMS	5
BP	GO:0044803	multi-organism membrane organization	5/2365	10/18862	0.00450335	0.0344401	0.0265917	CXCR4/CTSL/NECTIN2/HYAL2/PPIA	5
BP	GO:0048194	Golgi vesicle budding	5/2365	10/18862	0.00450335	0.0344401	0.0265917	GOLPH3L/TMED10/TMED2/TMED9/GOLPH3	5
BP	GO:0097278	complement-dependent cytotoxicity	5/2365	10/18862	0.00450335	0.0344401	0.0265917	HSP90AB1/CD55/C3/CFH/CD59	5
BP	GO:0000422	autophagy of mitochondrion	18/2365	75/18862	0.00452582	0.0344808	0.0266232	OPTN/ATP5IF1/BNIP3/FIS1/SQSTM1/VDAC1/PHB2/TP53/GBA/ATG5/HIF1A/FZD5/FUNDC2/TOMM7/ATG12/CTTN/TSPO/MAP1LC3B	18
BP	GO:0002200	somatic diversification of immune receptors	18/2365	75/18862	0.00452582	0.0344808	0.0266232	HSPD1/MAD2L2/SAMHD1/HMGB1/EXOSC3/MSH2/ERCC1/MSH6/DCLRE1C/UNG/RNF168/HMCES/BATF/CLCF1/RIF1/HMGB2/NSD2/IL27RA	18
BP	GO:0061726	mitochondrion disassembly	18/2365	75/18862	0.00452582	0.0344808	0.0266232	OPTN/ATP5IF1/BNIP3/FIS1/SQSTM1/VDAC1/PHB2/TP53/GBA/ATG5/HIF1A/FZD5/FUNDC2/TOMM7/ATG12/CTTN/TSPO/MAP1LC3B	18
BP	GO:0001667	ameboidal-type cell migration	79/2365	473/18862	0.00455504	0.0346597	0.0267613	S100P/TIMP1/HSPB1/TACSTD2/RHOB/SEMA3B/GLUL/PIK3R3/PTN/ANXA6/TMSB4X/ANGPT1/SVBP/HMGB1/ADAM9/ATP5F1B/PROX1/MET/PRKX/RAB11A/TGFBR1/SOX9/STRAP/ID1/ITGB2/LOXL2/ITGA3/PML/ITGA2/CSNK2B/CIB1/VEGFA/CEACAM1/ATP5F1A/ZNF580/ITGB4/SP100/MESP1/PDLIM1/PDCD10/LAMA5/PRCP/EDN1/HYAL1/C1QBP/GPI/ZFAND5/NFE2L2/AKAP12/LGALS8/AKT1/EPHA2/HIF1A/TGFBR2/CAP1/DOCK5/AAMP/LGMN/P2RX4/RRAS/ANXA1/RAB25/PDXDC1/SDC4/SEMA4B/TPBG/MAP…	79
BP	GO:0009749	response to glucose	36/2365	185/18862	0.00464041	0.0352648	0.0272285	HLA-DRB1/SOX4/OXCT1/NDUFA9/SRI/RACK1/LPL/PHPT1/SMARCB1/KIF5B/VSNL1/UCP2/LGALS1/SLC29A1/HMGN3/TXN2/EIF2B3/SMARCA4/NME1/PRKAA1/HIF1A/PIM3/TGFBR2/IGF1R/TRA2B/SELENOS/GCLM/EGR1/IRS2/TXNIP/CDK16/ICAM1/RAC1/JAGN1/XBP1/SMAD2	36
BP	GO:0031503	protein-containing complex localization	51/2365	283/18862	0.0046736	0.0354723	0.0273887	MX1/NPM1/EIF5A/SSB/SRRM1/RAN/SRSF3/RAE1/ALKBH5/CDC40/MAGOH/IFT74/KIF5B/MAGOHB/RAB11A/SRSF7/KIFAP3/SFPQ/IFT52/SLU7/ARL3/TPR/SRSF2/HNRNPU/DYNC2LI1/NUP62/DAG1/DBN1/DDX39A/MZT1/NCBP2/RBM8A/SSNA1/UPF2/SRSF4/HNRNPA2B1/HSPB11/SRSF11/NMD3/CLSTN1/AP3D1/FYTTD1/AGFG1/IFT27/EZR/NPTN/WASL/IFT20/THOC6/SEC13/SLBP	51
BP	GO:0043462	regulation of ATPase activity	19/2365	81/18862	0.00470475	0.0354728	0.0273891	DNAJA1/TPM2/CNN3/LTF/PLSCR1/IFIT1/RAB4A/MSH2/ATP1B3/ATP5IF1/MSH6/TP53/MCM2/DNAJC15/HNRNPU/DNAJB1/SNRNP70/TPM1/ATP1B1	19
BP	GO:1901185	negative regulation of ERBB signaling pathway	14/2365	53/18862	0.00471447	0.0354728	0.0273891	ERRFI1/AREG/GPRC5A/CDC42/PTPN18/PTPN12/NUP62/ERBB2/EREG/LGMN/RNF115/MVP/TGFA/PSEN1	14
BP	GO:0002475	antigen processing and presentation via MHC class Ib	6/2365	14/18862	0.00472342	0.0354728	0.0273891	AZGP1/B2M/HLA-E/TAP2/HLA-F/AP3D1	6
BP	GO:0035437	maintenance of protein localization in endoplasmic reticulum	6/2365	14/18862	0.00472342	0.0354728	0.0273891	INSIG1/KDELR2/KDELR3/RER1/GPAA1/HSPA5	6
BP	GO:0048569	post-embryonic animal organ development	6/2365	14/18862	0.00472342	0.0354728	0.0273891	ERCC1/BAK1/VEGFA/BAX/FZD5/MYO1E	6
BP	GO:0060253	negative regulation of glial cell proliferation	6/2365	14/18862	0.00472342	0.0354728	0.0273891	IDH2/ASCL2/PTN/CERS2/HES1/TSPO	6
BP	GO:1900102	negative regulation of endoplasmic reticulum unfolded protein response	6/2365	14/18862	0.00472342	0.0354728	0.0273891	RACK1/ABCA7/UFL1/PPP1R15A/NCK1/HSPA5	6
BP	GO:1901836	regulation of transcription of nucleolar large rRNA by RNA polymerase I	6/2365	14/18862	0.00472342	0.0354728	0.0273891	NOP53/SMARCB1/PWP1/NCL/SMARCA4/SIRT7	6
BP	GO:0006749	glutathione metabolic process	16/2365	64/18862	0.00472657	0.0354728	0.0273891	GCLC/GSTP1/SLC7A11/GSR/CLIC3/GLO1/CLIC1/SOD1/NFE2L2/MGST2/GGCT/CNDP2/ETHE1/ARL6IP5/GCLM/G6PD	16
BP	GO:0001890	placenta development	28/2365	135/18862	0.00476092	0.0356862	0.0275539	SPP1/RPS6/HSP90AB1/ASCL2/PTN/ADA/ST14/EPAS1/SPINT1/HEY1/SPINT2/GJB3/RSPO3/ANG/SOD1/TMED2/AKT1/HIF1A/CEBPB/FZD5/KRT8/HES1/ADM/MAPK3/PHLDA2/JUNB/KRT19/BSG	28
BP	GO:0071331	cellular response to hexose stimulus	27/2365	129/18862	0.00484128	0.0362435	0.0279842	HLA-DRB1/SOX4/OXCT1/SRI/RACK1/PHPT1/SMARCB1/KIF5B/VSNL1/UCP2/LGALS1/SLC29A1/HMGN3/SMARCA4/NME1/PRKAA1/HIF1A/PIM3/IGF1R/TRA2B/GCLM/IRS2/CDK16/ICAM1/RAC1/JAGN1/XBP1	27
BP	GO:0030099	myeloid cell differentiation	71/2365	419/18862	0.00486756	0.0363951	0.0281012	IFI16/STAT1/RPS6/RPS19/ISG15/CD74/HLA-DRB1/TESC/RPS14/PARP1/B2M/LTF/MAFB/CDKN2B/CDC42/HMGB1/CD81/PRKX/EPAS1/JUN/LGALS3/ATP5IF1/HSPA9/HDAC1/FSTL3/HSPA1A/PML/GPR137B/CEBPG/CIB1/VEGFA/PRMT1/DPY30/CEACAM1/PIK3R1/FAM210B/HMGB3/ANXA2/SMAP1/ASH2L/ITGB6/UFL1/GLO1/ZFP36/GBA/NME1/UBA5/BATF/CA2/TCIRG1/FOXO3/MYC/EPHA2/HIF1A/TGFBR2/CEBPB/MAEA/LBR/CDC73/FES/HMGB2/PIR/PSEN1/JUNB/PABPC4/NFKBIA/RUNX1/G6PD/JAGN1/P…	71
BP	GO:0061138	morphogenesis of a branching epithelium	34/2365	173/18862	0.00496319	0.0370643	0.0286179	TACSTD2/TBX3/BCL2/NKX3-1/PBX1/ST14/PROX1/MET/SIX1/SOX9/SPINT1/PML/VEGFA/SPINT2/KDM5B/PHB2/LAMA5/CLIC4/EDN1/RSPO3/PPP1CA/YAP1/CELSR1/DAG1/MYC/EPHA2/TGFBR2/FZD5/TGM2/ADM/MMP14/MDK/DDR1/CTNNB1	34
BP	GO:0006879	cellular iron ion homeostasis	17/2365	70/18862	0.00502178	0.0374554	0.0289199	FTL/LTF/LCN2/SRI/SKP1/FXN/SOD1/ATP6V1G1/MYC/HIF1A/SLC11A1/NCOA4/NEDD8/SLC40A1/ATP6V1A/SLC39A8/ATP6AP1	17
BP	GO:0016569	covalent chromatin modification	77/2365	461/18862	0.00504111	0.0375532	0.0289954	HDAC2/FBL/MUC1/MYB/SMARCB1/HAT1/EYA2/PWP1/UBE2N/MORF4L1/NOC2L/HDAC1/EPC1/ING4/MEAF6/SFPQ/NAA50/VEGFA/PRMT1/DPY30/EHMT2/KDM5B/SKP1/RUVBL2/RUVBL1/TP53/KDM1A/ACTL6A/CTBP1/GTF2B/THAP7/SMYD3/MAPK8/ASH2L/EYA3/UFL1/POLE3/EZH2/RNF168/WAC/ATG5/NSD3/USP22/SUV39H2/TAF7/HDAC3/SDR16C5/PHF20/PRKAA1/AURKA/DNMT1/NIPBL/BMI1/SETD7/PER1/RIF1/CDC73/KDM2A/CDK1/CCNB1/SET/MAPK3/RNF20/USP15/NTMT1/NSD2/JADE1/ZBTB7B/TRMT1…	77
BP	GO:0014009	glial cell proliferation	13/2365	48/18862	0.00505404	0.0375952	0.0290279	IDH2/SOX4/ASCL2/MYB/PTN/PPP1CC/UFL1/GBA/CERS2/CLU/HES1/EEF2/TSPO	13
BP	GO:0098727	maintenance of cell number	30/2365	148/18862	0.00505922	0.0375952	0.0290279	SOX4/ASCL2/TBX3/SOX2/PTN/PBX1/PROX1/SOX9/LOXL2/POLR2L/MCPH1/SMC3/POLR2I/WDR43/POLR2G/EZH2/YAP1/MYC/NIPBL/RIF1/CNOT2/HES1/CDC73/HOOK3/ZNF706/ZFP36L2/POLR2J/CTNNB1/SMC5/SMAD2	30
BP	GO:0001763	morphogenesis of a branching structure	36/2365	186/18862	0.0050764	0.0376302	0.0290549	TACSTD2/BCL11A/TBX3/BCL2/NKX3-1/PBX1/ST14/PROX1/MET/SIX1/SOX9/SPINT1/PML/VEGFA/SPINT2/KDM5B/PHB2/LAMA5/CLIC4/EDN1/RSPO3/PPP1CA/YAP1/CELSR1/DAG1/MYC/EPHA2/TGFBR2/FZD5/TGM2/ADM/MAP3K13/MMP14/MDK/DDR1/CTNNB1	36
BP	GO:0007219	Notch signaling pathway	36/2365	186/18862	0.0050764	0.0376302	0.0290549	YBX1/STAT1/EGFL7/CFD/PBX1/WDR12/IFT74/YTHDF2/ELF3/SOX9/HEY1/GMDS/NOTCH3/TSPAN15/MESP1/PDCD10/LLGL2/ARRDC1/YAP1/NEPRO/AKT1/MYC/TGFBR2/HES1/APH1A/MMP14/IL6ST/SEL1L/MIB2/PSEN1/MDK/NCSTN/NFKBIA/KRT19/PERP/CD46	36
BP	GO:0032271	regulation of protein polymerization	42/2365	225/18862	0.00516346	0.0380736	0.0293972	STMN1/HSP90AA1/FKBP4/TMSB4X/MET/RDX/HCK/ARPC5/HSPA1A/SVIL/DRG1/ACTR3/SSH3/ARPC1B/CAPZB/ABI2/MAP2/DBN1/SNX9/BAIAP2/SPTBN1/ARPC2/GSN/ADD3/NCK1/CAPZA1/MYO1C/ARF1/FES/FLII/BAIAP2L1/CTTN/NCKAP1/SPTAN1/AKAP9/WASL/ICAM1/RAC1/HIP1R/ARF6/ARPC1A/CLIP1	42
BP	GO:0031639	plasminogen activation	8/2365	23/18862	0.00517594	0.0380736	0.0293972	FGB/FGG/FGA/PLGRKT/ENO1/PLAU/HPN/RUNX1	8
BP	GO:0048026	positive regulation of mRNA splicing, via spliceosome	8/2365	23/18862	0.00517594	0.0380736	0.0293972	RBMX/NCL/HSPA8/THRAP3/RBMXL1/PRPF19/SNRNP70/TRA2B	8
BP	GO:0051457	maintenance of protein location in nucleus	8/2365	23/18862	0.00517594	0.0380736	0.0293972	CHCHD10/PML/SKP1/SP100/BARD1/TOPORS/ARL2BP/HNRNPU	8
BP	GO:0097066	response to thyroid hormone	8/2365	23/18862	0.00517594	0.0380736	0.0293972	CTSL/CTSB/RDX/KLF9/GBA/HPN/GCLM/CTSS	8
BP	GO:1901984	negative regulation of protein acetylation	8/2365	23/18862	0.00517594	0.0380736	0.0293972	HDAC2/NOC2L/CTBP1/THAP7/ATG5/TAF7/SDR16C5/SET	8
BP	GO:1902373	negative regulation of mRNA catabolic process	15/2365	59/18862	0.00518038	0.0380736	0.0293972	YBX1/PAIP1/HNRNPA0/SYNCRIP/HNRNPC/THRAP3/YBX3/ZFP36/HNRNPU/PKP3/SLC11A1/MAPKAPK2/TAF15/TOB1/SECISBP2	15
BP	GO:0031589	cell-substrate adhesion	62/2365	359/18862	0.00533553	0.0391662	0.0302408	GBP1/S100A10/CDKN2A/FGB/AGR2/FGG/FGA/TACSTD2/MSLN/BCL2/PTN/CD63/ANGPT1/CDC42/MUC4/ADAM9/LAMB3/APOD/P4HB/PRKX/PLAU/CEACAM6/ID1/ITGB2/ITGA3/RHOD/ITGA2/RSU1/CIB1/VEGFA/PIK3R1/CCL28/ADAM15/ITGB4/EFEMP2/LGALS1/NDNF/LAMA5/ITGB6/ITGAV/EPDR1/C1QBP/DAG1/LAMC1/ARPC2/DOCK5/FLNA/CRKL/TRIP6/RRAS/MKLN1/SDC4/MMP14/CTTN/COL1A1/MAP4K4/MDK/LYPD3/PXN/DDR1/RAC1/RAC3	62
BP	GO:0090305	nucleic acid phosphodiester bond hydrolysis	54/2365	305/18862	0.00535753	0.0392799	0.0303286	AZGP1/RPS27A/PARP1/PLSCR1/EXOSC5/TSN/PCNA/SAMHD1/TSNAX/RPP40/HMGB1/RCL1/RPS21/EXOSC3/ERCC1/RAD1/XRN2/RNASET2/ERI3/MRPL44/LACTB2/DCLRE1C/PNRC2/POLR2I/G3BP1/CNOT7/APEX1/NOB1/EXD3/POLD4/ZFP36/EXOSC9/CPSF6/EXOSC8/RFC4/BMS1/ANG/RFC1/BAX/RPP30/NCBP2/GTF2H5/FEN1/TATDN1/RFC3/REXO2/PNPT1/CNOT2/TSEN15/HMGB2/ISG20/RNASE1/NTHL1/TDP2	54
BP	GO:0071326	cellular response to monosaccharide stimulus	27/2365	130/18862	0.00539763	0.0395258	0.0305185	HLA-DRB1/SOX4/OXCT1/SRI/RACK1/PHPT1/SMARCB1/KIF5B/VSNL1/UCP2/LGALS1/SLC29A1/HMGN3/SMARCA4/NME1/PRKAA1/HIF1A/PIM3/IGF1R/TRA2B/GCLM/IRS2/CDK16/ICAM1/RAC1/JAGN1/XBP1	27
BP	GO:0045824	negative regulation of innate immune response	16/2365	65/18862	0.0055557	0.0405433	0.0313042	IFI16/HLA-B/RPS19/LGALS9/SERPING1/PARP14/SAMHD1/HLA-E/YTHDF2/SERPINB4/NMI/CEACAM1/CNOT7/HLA-F/HLA-A/GRN	16
BP	GO:0031440	regulation of mRNA 3'-end processing	9/2365	28/18862	0.00557361	0.0405433	0.0313042	BARD1/SNRPA/CPSF6/NCBP2/DHX36/CDC73/CCNB1/RNF20/AHCYL1	9
BP	GO:0033028	myeloid cell apoptotic process	9/2365	28/18862	0.00557361	0.0405433	0.0313042	CDKN2A/TCP1/CTSL/BCL2/SLC7A11/MAEA/SELENOS/ANXA1/ARF6	9
BP	GO:0001914	regulation of T cell mediated cytotoxicity	11/2365	38/18862	0.00557689	0.0405433	0.0313042	HLA-B/HLA-DRA/AZGP1/HLA-DRB1/B2M/HLA-E/CEACAM1/HLA-F/PVR/NECTIN2/HLA-A	11
BP	GO:0097242	amyloid-beta clearance	11/2365	38/18862	0.00557689	0.0405433	0.0313042	ABCA7/RAB11A/C3/ITGB2/HDAC1/LRPAP1/PICALM/CLTC/CLU/IGF1R/RAB5A	11
BP	GO:2000249	regulation of actin cytoskeleton reorganization	11/2365	38/18862	0.00557689	0.0405433	0.0313042	PHPT1/CDC42/HCK/BAIAP2/TJP1/FES/BAIAP2L1/ARHGDIA/MDK/F11R/CD2AP	11
BP	GO:0051052	regulation of DNA metabolic process	61/2365	353/18862	0.00560842	0.0407235	0.0314432	HSP90AB1/NPM1/HSP90AA1/TCP1/PARP1/SUB1/MAD2L2/XRCC5/PARP9/CCT2/CCT4/HNRNPA1/CCT3/DEK/PCNA/HMGB1/NUCKS1/EXOSC3/CCT7/EYA2/DUSP1/MSH2/CCT5/ERCC1/CYREN/UBE2N/CGAS/PTGES3/PML/PKIB/CEBPG/DKC1/USP1/MSH6/TP53/KDM1A/RAD51AP1/HNRNPC/EYA3/RNF168/NVL/HMCES/CCT8/HNRNPU/RFC4/BABAM2/CLCF1/AKT1/BAX/MYC/HNRNPA2B1/RFC3/DHX36/RIF1/NABP2/MAPK3/NSD2/ANXA3/PPP4C/SIRT7/IL27RA	61
BP	GO:0018394	peptidyl-lysine acetylation	33/2365	168/18862	0.00562812	0.0408174	0.0315158	HDAC2/MUC1/SOX4/SMARCB1/HAT1/MORF4L1/NOC2L/EPC1/ING4/MEAF6/NAA50/RUVBL2/RUVBL1/ESCO1/ACTL6A/CTBP1/GTF2B/THAP7/POLE3/ATG5/USP22/TAF7/SDR16C5/PHF20/PRKAA1/PER1/SET/MAPK3/JADE1/MORF4L2/MBIP/TAF6/SMC5	33
BP	GO:0150115	cell-substrate junction organization	23/2365	106/18862	0.00564119	0.0408424	0.0315351	S100A10/BCL2/CD151/LAMC2/LAMB3/APOD/PLEC/RHOD/ITGA2/VEGFA/PIK3R1/ITGB4/LAMA3/LAMC1/DST/TRIP6/SDC4/MMP14/CTTN/MAP4K4/RAC1/ARF6/LAMTOR2	23
BP	GO:0016447	somatic recombination of immunoglobulin gene segments	14/2365	54/18862	0.00564511	0.0408424	0.0315351	HSPD1/MAD2L2/EXOSC3/MSH2/ERCC1/MSH6/UNG/RNF168/HMCES/BATF/CLCF1/RIF1/NSD2/IL27RA	14
BP	GO:0009648	photoperiodism	10/2365	33/18862	0.00567441	0.0410052	0.0316608	ID2/PPP1CC/PML/TP53/NR2F6/PPP1CA/PPP1CB/PER1/BHLHE40/NMU	10
BP	GO:0051495	positive regulation of cytoskeleton organization	41/2365	220/18862	0.00583662	0.042127	0.0325269	S100A10/CDC42/VPS4B/PROX1/MET/HCK/TGFBR1/ID1/ARPC5/HSPA1A/DRG1/ACTR3/EDN1/ARPC1B/NUP62/ABI2/SNX9/BAIAP2/ARPC2/GSN/TPM1/FLNA/NCK1/MYO1C/ARF1/FES/RHOC/SDC4/BAIAP2L1/CTTN/NCKAP1/AKAP9/WASL/ICAM1/DSTN/PXN/RAC1/HIP1R/ARF6/ARPC1A/CLIP1	41
BP	GO:0000280	nuclear division	73/2365	436/18862	0.00584368	0.0421276	0.0325274	SYCP2/MAD2L2/SMC2/RPL24/RAN/IK/CAV2/CDC42/LSM14A/VPS4B/DUSP1/RAB11A/PPP2R1A/KLHDC3/NUDC/RAD1/HSPA1A/NAA10/BUB3/NAA50/SMC4/BOD1/PHIP/DRG1/SMC3/MISP/FBXW5/ACTR3/PHB2/FBXO5/RAD51AP1/PLCB1/LPIN1/CCNB1IP1/EDN1/CDC25B/TTK/PTTG1/TPR/HNRNPU/NUP62/ANAPC11/UBE2S/PPP2CA/KIF2A/EREG/MZT1/AURKA/AURKAIP1/CENPF/NIPBL/FLNA/KIF2C/RAD21/CDK1/CCNB1/NUF2/RANBP1/TGFA/CDC20/TPX2/GOLGA2/NUSAP1/CHMP1B/CENPX/RMDN1/CDC26/S…	73
BP	GO:1903322	positive regulation of protein modification by small protein conjugation or removal	28/2365	137/18862	0.00587813	0.0423253	0.0326801	RPS2/SAE1/NOP53/ANGPT1/CAV1/BIRC3/UBA2/UBE2N/NMI/PTTG1IP/SKP1/VCP/KDM1A/UBE2L3/TOPORS/TNIP1/PEF1/UBE2S/HDAC3/INAVA/BMI1/RNF20/XIAP/CDC20/GOLGA2/CENPX/PDCD6/HSPA5	28
BP	GO:0110053	regulation of actin filament organization	49/2365	273/18862	0.00592182	0.0425891	0.0328837	STMN1/S100A10/TACSTD2/TMSB4X/CDC42/MET/RDX/HCK/TGFBR1/ID1/ARPC5/SVIL/PIK3R1/ACTR3/SSH3/ARPC1B/CAPZB/ABI2/DBN1/SNX9/BAIAP2/TJP1/SPTBN1/ARPC2/GSN/TPM1/ADD3/FLNA/NCK1/CAPZA1/MYO1C/ARF1/FLII/RHOC/LIMA1/SDC4/BAIAP2L1/CTTN/NCKAP1/SPTAN1/WASL/ICAM1/DSTN/F11R/PXN/RAC1/HIP1R/ARF6/ARPC1A	49
BP	GO:0060284	regulation of cell development	80/2365	485/18862	0.00597491	0.0429198	0.033139	GBP1/S100A10/SPP1/RPS19/PAEP/CXCR4/HDAC2/FGB/IDH2/FGG/FGA/TACSTD2/B2M/XRCC5/LTF/BCL11A/ASCL2/SEMA3B/MYB/HES6/BCL2/PTN/CDC42/PPP1CC/DYNLT1/P4HB/RFX3/YTHDF2/CAPRIN1/RAB11A/ID1/SPINT1/HEY1/HDAC1/NAP1L1/PLXNB2/CIB1/VEGFA/TP53/KDM1A/PLCB1/TMEM98/UFL1/EZH2/C1QBP/YAP1/DAG1/MAP2/DBN1/CERS2/PRPF19/CLCF1/METRN/ARPC2/AURKA/HIF1A/DOCK5/FLNA/DHX36/BHLHE40/CRKL/HES1/MAP3K13/HMGB2/SEMA4B/CRABP2/IL6ST/NPTN/HOOK3…	80
BP	GO:0030856	regulation of epithelial cell differentiation	31/2365	156/18862	0.00599444	0.0430089	0.0332078	STAT1/ERRFI1/BTG1/AQP3/CTSL/TBX3/SFN/CAV1/PROM1/RFX3/PRKX/CD24/SOX9/ID1/VEGFA/CEACAM1/PLCB1/MESP1/EZH2/ZFP36/YAP1/CTSV/CEBPB/MAFG/SULT2B1/HES1/F11R/RUNX1/CCND1/CTNNB1/TNFRSF1A	31
BP	GO:0070231	T cell apoptotic process	13/2365	49/18862	0.00610546	0.0437015	0.0337426	RPS6/LGALS9/IDO1/ADA/LGALS3/BAK1/ZC3H8/TP53/ADAM8/AKT1/BAX/HIF1A/TSC22D3	13
BP	GO:2000059	negative regulation of ubiquitin-dependent protein catabolic process	13/2365	49/18862	0.00610546	0.0437015	0.0337426	RPL5/HSP90AB1/RPL11/NOP53/RPS7/SDCBP/SMARCC1/PML/PDCL3/WAC/CSNK2A1/UBXN1/PSEN1	13
BP	GO:0043489	RNA stabilization	15/2365	60/18862	0.00612362	0.0437795	0.0338029	YBX1/PAIP1/HNRNPA0/SYNCRIP/DKC1/ZCCHC17/HNRNPC/THRAP3/YBX3/ZFP36/HNRNPU/SLC11A1/DHX36/MAPKAPK2/TAF15	15
BP	GO:0002716	negative regulation of natural killer cell mediated immunity	7/2365	19/18862	0.00616434	0.0438111	0.0338273	HLA-B/LGALS9/HLA-E/SERPINB4/CEACAM1/HLA-F/HLA-A	7
BP	GO:0006144	purine nucleobase metabolic process	7/2365	19/18862	0.00616434	0.0438111	0.0338273	SHMT1/GMPS/ADA/KDM1A/SHMT2/PAICS/APRT	7
BP	GO:0019184	nonribosomal peptide biosynthetic process	7/2365	19/18862	0.00616434	0.0438111	0.0338273	GCLC/SLC7A11/NFE2L2/MGST2/GGCT/CNDP2/GCLM	7
BP	GO:0039535	regulation of RIG-I signaling pathway	7/2365	19/18862	0.00616434	0.0438111	0.0338273	NOP53/BIRC3/C1QBP/NPLOC4/DDX60/USP15/UFD1	7
BP	GO:0070262	peptidyl-serine dephosphorylation	7/2365	19/18862	0.00616434	0.0438111	0.0338273	DUSP1/YWHAE/PPP1CA/PPP1R15A/PPP2CA/PPP2CB/NCK1	7
BP	GO:0006354	DNA-templated transcription, elongation	25/2365	119/18862	0.00622008	0.0441324	0.0340753	NELFCD/ZNF326/HTATSF1/POLR2L/POLR1E/POLR2I/HMGN1/WDR43/POLR2G/CCNH/SSRP1/ELL2/EZH2/RNF168/ELOA/HNRNPU/TCERG1/NCBP2/GTF2H5/CDC73/ADRM1/NELFA/TCEA2/ELOC/POLR2J	25
BP	GO:0031667	response to nutrient levels	75/2365	451/18862	0.00622417	0.0441324	0.0340753	IFI16/KYNU/SPP1/AQP3/AKR1C3/OXCT1/EIF2AK2/CXCL10/HNRNPA1/C2/BCL2/PTN/LPL/IGFBP2/CDKN2B/HAT1/EIF4EBP1/RRAGD/ADA/SLC2A1/EIF2A/PROX1/RRAGA/JUN/AHCY/ERCC1/BNIP3/ITGA2/UPP1/UCP2/EHMT2/CD68/GSTP1/SORD/CCL28/TP53/SPX/TXN2/HSPA8/DDIT3/MAPK8/ATF3/DNAJC15/ZFP36/GBA/STK24/ATG5/SOD1/NFE2L2/FOXO3/AKT1/TYMS/PRKAA1/GSN/TGFBR2/ENSA/ADM/GCLM/XPR1/FES/EEF2/MAPK3/ATP2B1/GCN1/COL1A1/ICAM1/DAD1/KRT18/TSPO/G6PD/NQO1/C…	75
BP	GO:0009743	response to carbohydrate	41/2365	221/18862	0.00631964	0.0447567	0.0345574	HLA-DRB1/SOX4/OXCT1/NDUFA9/SRI/RACK1/LPL/PHPT1/SMARCB1/KIF5B/ERCC1/VSNL1/ITGA2/UCP2/GSTP1/LGALS1/SLC29A1/HMGN3/TXN2/EIF2B3/SMARCA4/NME1/PRKAA1/HIF1A/PIM3/TGFBR2/IGF1R/TRA2B/SELENOS/GCLM/EGR1/IRS2/TXNIP/CDK16/ICAM1/KRT18/RAC1/JAGN1/NQO1/XBP1/SMAD2	41
BP	GO:0051985	negative regulation of chromosome segregation	12/2365	44/18862	0.00653754	0.0460836	0.0355819	MAD2L2/IK/DUSP1/BUB3/FBXO5/TTK/PTTG1/TPR/CENPF/RAD21/CCNB1/CDC20	12
BP	GO:1901658	glycosyl compound catabolic process	12/2365	44/18862	0.00653754	0.0460836	0.0355819	CDA/ADA/AHCY/NT5C3A/UPP1/APOBEC3G/GBA/NT5E/GLA/TYMP/FUCA1/NT5C	12
BP	GO:1903214	regulation of protein targeting to mitochondrion	12/2365	44/18862	0.00653754	0.0460836	0.0355819	SAE1/PDCD5/ATP5IF1/UBE2L3/PRKAA1/FZD5/NPEPPS/UBE2J2/TOMM7/UBL5/LMAN1/LEPROT	12
BP	GO:1905819	negative regulation of chromosome separation	12/2365	44/18862	0.00653754	0.0460836	0.0355819	MAD2L2/IK/DUSP1/BUB3/FBXO5/TTK/PTTG1/TPR/CENPF/RAD21/CCNB1/CDC20	12
BP	GO:0006261	DNA-dependent DNA replication	31/2365	157/18862	0.00659456	0.0464312	0.0358503	PCNA/SAMHD1/HMGA1/NUCKS1/RTF2/STOML2/MMS22L/PRIM1/MCM6/GINS2/ORC4/ORC3/FBXO5/MCM7/POLE4/MCM3/LIG1/MCM2/MCM5/POLD4/POLE3/RFC4/RFC1/FEN1/RPAIN/RFC3/CDC34/FAM111A/RECQL/CENPX/SIRT7	31
BP	GO:0010595	positive regulation of endothelial cell migration	27/2365	132/18862	0.00667083	0.0468589	0.0361805	HSPB1/RHOB/TMSB4X/ANGPT1/HMGB1/ATP5F1B/PROX1/MET/CIB1/VEGFA/ATP5F1A/ZNF580/EDN1/GPI/NFE2L2/AKT1/HIF1A/AAMP/LGMN/P2RX4/RRAS/ANXA1/ANXA3/GRN/PDCD6/RAC1/EMC10	27
BP	GO:0032434	regulation of proteasomal ubiquitin-dependent protein catabolic process	27/2365	132/18862	0.00667083	0.0468589	0.0361805	HSP90AB1/RPL11/RACK1/NOP53/CAV1/SDCBP/SMARCC1/DESI1/HSPA1A/CSNK1A1/VCP/UFL1/GBA/WAC/NUB1/SUMO1/NFE2L2/AKT1/CLU/AURKA/UBXN1/DVL1/CSNK1E/CDC20/PSEN1/CSNK1D/BCAP31	27
BP	GO:0007162	negative regulation of cell adhesion	52/2365	295/18862	0.00675746	0.0474122	0.0366077	GBP1/CDKN2A/CD74/HLA-DRB1/LGALS9/MUC1/IDO1/TACSTD2/MAD2L2/IRF1/CD9/ANGPT1/HMGB1/GTPBP4/ATP5F1B/APOD/DUSP1/YTHDF2/RDX/LGALS3/PRDX2/PLXNB2/ZC3H8/VEGFA/SPINT2/CEACAM1/PIK3R1/SCGB1A1/CCL28/ADAM15/LGALS1/CDH1/ERBB2/AKT1/CEBPB/CD164/CLDN7/SIPA1/ANXA1/FXYD5/SDC4/MMP14/TNFRSF21/COL1A1/MAP4K4/ARHGDIA/ZBTB7B/MDK/TGFBI/ERBB3/RUNX1/PTPN11	52
BP	GO:0006695	cholesterol biosynthetic process	17/2365	72/18862	0.00678205	0.0474193	0.0366132	RAN/ACAT2/CES1/IDI1/INSIG1/FDFT1/FDPS/NFYC/SOD1/PRKAA1/SQLE/LBR/SCD/TM7SF2/G6PD/PMVK/DHCR24	17
BP	GO:0009119	ribonucleoside metabolic process	17/2365	72/18862	0.00678205	0.0474193	0.0366132	CDA/GMPS/MTAP/RAN/ADA/AK3/AHCY/UPP1/GNAI3/AK4/NME7/APOBEC3G/PRTFDC1/NME1/NT5E/APRT/NME3	17
BP	GO:1902653	secondary alcohol biosynthetic process	17/2365	72/18862	0.00678205	0.0474193	0.0366132	RAN/ACAT2/CES1/IDI1/INSIG1/FDFT1/FDPS/NFYC/SOD1/PRKAA1/SQLE/LBR/SCD/TM7SF2/G6PD/PMVK/DHCR24	17
BP	GO:0006284	base-excision repair	11/2365	39/18862	0.00690483	0.0478562	0.0369505	PCNA/HMGB1/TDG/UNG/APEX1/LIG1/MBD4/MPG/FEN1/NTHL1/SMUG1	11
BP	GO:0006656	phosphatidylcholine biosynthetic process	11/2365	39/18862	0.00690483	0.0478562	0.0369505	CSNK2B/LPIN1/STARD10/LPCAT1/CSNK2A1/CDS1/SLC44A4/SLC44A2/LPIN2/GPAT4/CAPN2	11
BP	GO:0043001	Golgi to plasma membrane protein transport	11/2365	39/18862	0.00690483	0.0478562	0.0369505	OPTN/RACK1/GOLPH3L/AMN/RAB34/VAMP5/SEC16A/SPTBN1/GOLGA7/KRT18/GOLPH3	11
BP	GO:0045841	negative regulation of mitotic metaphase/anaphase transition	11/2365	39/18862	0.00690483	0.0478562	0.0369505	MAD2L2/IK/DUSP1/BUB3/FBXO5/TTK/TPR/CENPF/RAD21/CCNB1/CDC20	11
BP	GO:0090224	regulation of spindle organization	11/2365	39/18862	0.00690483	0.0478562	0.0369505	RAE1/VPS4B/HSPA1A/DRG1/TPR/HNRNPU/NUP62/CLTC/TPX2/CHMP1B/CHMP4C	11
BP	GO:1901998	toxin transport	11/2365	39/18862	0.00690483	0.0478562	0.0369505	DNAJA1/TCP1/CCT2/CCT4/CCT3/CCT7/CCT5/BNIP3/CCT8/COPB2/HSPA5	11
BP	GO:0000466	maturation of 5.8S rRNA from tricistronic rRNA transcript (SSU-rRNA, 5.8S rRNA, LSU-rRNA)	8/2365	24/18862	0.00692384	0.0478562	0.0369505	RPP40/WDR12/RCL1/RPS21/EXOSC3/ERI3/EXOSC9/EXOSC8	8
BP	GO:0002418	immune response to tumor cell	8/2365	24/18862	0.00692384	0.0478562	0.0369505	HLA-DRB1/HSPD1/HMGB1/CEACAM1/ADAM15/PVR/NECTIN2/HLA-A	8
BP	GO:0008334	histone mRNA metabolic process	8/2365	24/18862	0.00692384	0.0478562	0.0369505	SNRPE/SSB/SNRPF/SNRPD3/MTPAP/SNRPG/NCBP2/SLBP	8
BP	GO:0061436	establishment of skin barrier	8/2365	24/18862	0.00692384	0.0478562	0.0369505	STMN1/SFN/MET/CLDN1/CLDN4/FA2H/ELOVL1/KRT16	8
BP	GO:0010770	positive regulation of cell morphogenesis involved in differentiation	18/2365	78/18862	0.00698459	0.0482209	0.0372321	S100A10/FGB/FGG/FGA/CDC42/P4HB/CAPRIN1/CIB1/C1QBP/DBN1/ARPC2/DOCK5/FLNA/DHX36/CRKL/MDK/RAC1/RAC3	18
BP	GO:0001678	cellular glucose homeostasis	29/2365	145/18862	0.00700719	0.0482537	0.0372575	HLA-DRB1/SOX4/OXCT1/SRI/RACK1/PHPT1/SMARCB1/NUCKS1/KIF5B/VSNL1/UCP2/PIK3R1/LGALS1/SLC29A1/HMGN3/SMARCA4/NME1/PRKAA1/HIF1A/PIM3/IGF1R/TRA2B/GCLM/IRS2/CDK16/ICAM1/RAC1/JAGN1/XBP1	29
BP	GO:0038127	ERBB signaling pathway	29/2365	145/18862	0.00700719	0.0482537	0.0372575	IFI6/ERRFI1/AGR2/HSP90AA1/AREG/FAM83A/GPRC5A/CDC42/SOX9/CEACAM1/PIK3R1/PTPN18/PTPN12/PTK6/NUP62/ERBB2/AKT1/EREG/ARF4/LGMN/RNF115/SHC1/MVP/TGFA/PSEN1/ERBB3/HIP1R/PTPN11/PLAUR	29
BP	GO:0018205	peptidyl-lysine modification	66/2365	391/18862	0.00703877	0.0482537	0.0372575	HDAC2/MUC1/SOX4/BCL11A/IFIH1/MYB/SAE1/RAE1/SMARCB1/HAT1/UBA2/PWP1/MORF4L1/LOXL2/DESI1/NOC2L/EPC1/ING4/MEAF6/NAA50/DPY30/EHMT2/RUVBL2/RUVBL1/KDM1A/ESCO1/ACTL6A/CTBP1/GTF2B/THAP7/SMYD3/TOPORS/ASH2L/POLE3/EZH2/TPR/ATG5/NUP62/SUMO1/NSD3/USP22/SUV39H2/TAF7/SDR16C5/PHF20/PRKAA1/DNMT1/SETD7/PER1/RIF1/TGM2/EGR1/SET/PLOD3/MAPK3/NSD2/JADE1/TRMT112/MORF4L2/MBIP/TAF6/SIRT7/CTNNB1/MLLT6/SMC5/PLOD2	66
BP	GO:0019321	pentose metabolic process	6/2365	15/18862	0.00704612	0.0482537	0.0372575	FGGY/TALDO1/NUDT5/RPIA/DCXR/G6PD	6
BP	GO:0060008	Sertoli cell differentiation	6/2365	15/18862	0.00704612	0.0482537	0.0372575	SDC1/SOX9/HSD17B4/FLNA/RAB13/ICAM1	6
BP	GO:1900121	negative regulation of receptor binding	6/2365	15/18862	0.00704612	0.0482537	0.0372575	B2M/NKX3-1/RUVBL2/ADAM15/ATP2A2/PTPRF	6
BP	GO:2001028	positive regulation of endothelial cell chemotaxis	6/2365	15/18862	0.00704612	0.0482537	0.0372575	HSPB1/TMSB4X/MET/VEGFA/LGMN/P2RX4	6
BP	GO:0051225	spindle assembly	24/2365	114/18862	0.00705333	0.0482537	0.0372575	TUBB/LSM14A/VPS4B/RAB11A/HAUS6/HSPA1A/DRG1/SMC3/MISP/HAUS1/FBXO5/TPR/HNRNPU/HDAC3/KIF2A/MZT1/AURKA/FLNA/CDC20/TPX2/GOLGA2/CHMP1B/CHMP4C/CSNK1D	24
BP	GO:0007565	female pregnancy	34/2365	177/18862	0.0071245	0.0484885	0.0374388	SPP1/TIMP1/LGALS9/IDO1/HPGD/BCL2/PTN/IGFBP2/SLC2A1/ITGA3/ITGA2/UCP2/VEGFA/SCGB1A1/ITGB4/UMPS/C1QBP/SOD1/TMED2/AKT1/PAM/DSG2/TGFBR2/UBE2Q1/CLDN4/ADM/MAPK3/FOSB/JUNB/UBE2A/DDR1/CAPN2/RPL29/BSG	34
BP	GO:0034446	substrate adhesion-dependent cell spreading	23/2365	108/18862	0.00713822	0.0484885	0.0374388	GBP1/S100A10/FGB/FGG/FGA/TACSTD2/CDC42/LAMB3/P4HB/CIB1/PIK3R1/LAMA5/ITGAV/C1QBP/LAMC1/ARPC2/DOCK5/FLNA/CRKL/MDK/PXN/RAC1/RAC3	23
BP	GO:0009649	entrainment of circadian clock	10/2365	34/18862	0.00715231	0.0484885	0.0374388	ID2/PPP1CC/PML/TP53/NR2F6/PPP1CA/PPP1CB/PER1/BHLHE40/GNAQ	10
BP	GO:1901661	quinone metabolic process	10/2365	34/18862	0.00715231	0.0484885	0.0374388	AKR1C2/AKR1C3/NDUFA9/COQ3/AKR1B10/COQ8A/AKR1C1/CYP4F3/COQ4/CBR3	10
BP	GO:0010631	epithelial cell migration	61/2365	357/18862	0.00716771	0.0484885	0.0374388	S100P/HSPB1/TACSTD2/RHOB/GLUL/PIK3R3/PTN/TMSB4X/ANGPT1/SVBP/HMGB1/ADAM9/ATP5F1B/PROX1/MET/PRKX/RAB11A/TGFBR1/SOX9/STRAP/ID1/ITGB2/LOXL2/ITGA3/ITGA2/CSNK2B/CIB1/VEGFA/CEACAM1/ATP5F1A/ZNF580/SP100/PDCD10/PRCP/EDN1/HYAL1/GPI/NFE2L2/LGALS8/AKT1/EPHA2/HIF1A/TGFBR2/DOCK5/AAMP/LGMN/P2RX4/RRAS/ANXA1/RAB25/MAP4K4/ANXA3/RAB13/GRN/PXN/PDCD6/RAC1/ARF6/EMC10/KRT16/PTPN11	61
BP	GO:0006368	transcription elongation from RNA polymerase II promoter	20/2365	90/18862	0.00719075	0.0484885	0.0374388	NELFCD/POLR2L/POLR2I/WDR43/POLR2G/CCNH/SSRP1/ELL2/EZH2/RNF168/ELOA/HNRNPU/TCERG1/NCBP2/GTF2H5/CDC73/ADRM1/NELFA/ELOC/POLR2J	20
BP	GO:1903557	positive regulation of tumor necrosis factor superfamily cytokine production	20/2365	90/18862	0.00719075	0.0484885	0.0374388	HDAC2/LGALS9/HSPB1/DDX58/IFIH1/LPL/HMGB1/HLA-E/ARHGEF2/PIK3R1/DDT/ADAM8/CLU/FZD5/MAPKAPK2/CYBA/MIF/PSEN1/SELENOK/PTPN11	20
BP	GO:0019048	modulation by virus of host process	9/2365	29/18862	0.00719826	0.0484885	0.0374388	EIF2AK2/RRAGA/PHB2/KPNA3/VAPB/DAG1/RXRA/TYMS/HYAL2	9
BP	GO:0043153	entrainment of circadian clock by photoperiod	9/2365	29/18862	0.00719826	0.0484885	0.0374388	ID2/PPP1CC/PML/TP53/NR2F6/PPP1CA/PPP1CB/PER1/BHLHE40	9
BP	GO:0050690	regulation of defense response to virus by virus	9/2365	29/18862	0.00719826	0.0484885	0.0374388	B2M/EIF2AK2/HCK/AP2S1/AP2M1/ARF1/AP1S1/RAC1/AP2A1	9
BP	GO:0051642	centrosome localization	9/2365	29/18862	0.00719826	0.0484885	0.0374388	KIF5B/INTS13/MISP/DYNC1LI2/AURKA/SYNE2/EZR/AKAP9/IFT20	9
BP	GO:0046686	response to cadmium ion	15/2365	61/18862	0.00720015	0.0484885	0.0374388	AKR1C3/B2M/MT1E/PCNA/JUN/ERCC1/MT1M/SORD/MAPK8/SUMO1/SOD1/AKT1/GSN/MAPK3/CYB5A	15
BP	GO:0070936	protein K48-linked ubiquitination	15/2365	61/18862	0.00720015	0.0484885	0.0374388	IFI27/UBE2Q2/UBE2D2/NMI/SKP1/TOPORS/UBE2T/AMFR/CDC34/RNF115/UBE2E3/UBE2H/NEDD4L/PPIA/UBE2A	15
BP	GO:0080164	regulation of nitric oxide metabolic process	15/2365	61/18862	0.00720015	0.0484885	0.0374388	HSP90AB1/HSP90AA1/CAV1/ITGB2/EDN1/AKT1/CLU/GLA/DDAH2/HBB/P2RX4/SELENOS/ICAM1/RAC1/TSPO	15
BP	GO:1901184	regulation of ERBB signaling pathway	21/2365	96/18862	0.00721347	0.048524	0.0374662	IFI6/ERRFI1/AGR2/AREG/GPRC5A/CDC42/CEACAM1/PTPN18/PTPN12/PTK6/NUP62/ERBB2/AKT1/EREG/LGMN/RNF115/MVP/TGFA/PSEN1/HIP1R/PLAUR	21
BP	GO:1902652	secondary alcohol metabolic process	31/2365	158/18862	0.00724386	0.0486742	0.0375822	IDH2/RAN/NPC2/ACAT2/CES1/TTC39B/IDI1/INSIG1/IDH3B/TSKU/IDH3G/FDFT1/FDPS/NFYC/GBA/IDH3A/SOD1/RXRA/PRKAA1/SULT2B1/SQLE/LBR/SCD/LIMA1/FDX1/APOL1/TM7SF2/G6PD/HDLBP/PMVK/DHCR24	31
BP	GO:1903037	regulation of leukocyte cell-cell adhesion	57/2365	330/18862	0.00729221	0.0489182	0.0377705	HLA-DRA/CD74/HLA-DRB1/HLA-DPA1/LGALS9/HLA-DPB1/HSPD1/SOX4/IDO1/IRF1/MYB/HSPH1/IGFBP2/CAV1/CDC42/CD55/HMGB1/HLA-E/ADA/CD81/CD24/LGALS3/ITGB2/HLA-DMB/PRDX2/ZC3H8/CEACAM1/PIK3R1/SCGB1A1/CCL28/LGALS1/MAP3K8/ADAM8/ERBB2/AKT1/TGFBR2/CEBPB/ST3GAL4/HES1/NCK1/ANXA1/AP3D1/FLOT2/SDC4/IL6ST/TNFRSF21/HLA-A/ZBTB7B/ICAM1/MDK/SELENOK/RAC1/RUNX1/IL27RA/PTPN11/XBP1/CD46	57
BP	GO:0002931	response to ischemia	13/2365	50/18862	0.0073238	0.0489182	0.0377705	BCL2/CAV1/EIF4EBP1/SQSTM1/CIB1/TP53/NDNF/P2RX4/NOL3/EGR1/HYOU1/EEF2/NQO1	13
BP	GO:0009066	aspartate family amino acid metabolic process	13/2365	50/18862	0.0073238	0.0489182	0.0377705	PHGDH/APIP/MTAP/ALDH7A1/ASRGL1/GCAT/SMS/NIT2/MTHFD1/BHMT2/SDSL/PLOD3/PLOD2	13
BP	GO:0042157	lipoprotein metabolic process	27/2365	133/18862	0.0073951	0.0489182	0.0377705	APOL4/GLUL/APOL6/APOL3/APOD/CTSD/DPM1/ZDHHC12/ITGAV/ZDHHC9/GBA/APOC1/ATG5/DPM2/PIGT/GOLGA7/ABHD17C/ATG12/ZDHHC24/PIGP/APOL1/ZDHHC4/DPM3/SELENOK/GPAA1/PYURF/ABHD12	27
BP	GO:0001765	membrane raft assembly	5/2365	11/18862	0.00740988	0.0489182	0.0377705	S100A10/CAV2/CAV1/ANXA2/FLOT2	5
BP	GO:0019042	viral latency	5/2365	11/18862	0.00740988	0.0489182	0.0377705	PSIP1/XRCC5/HMGA1/NUCKS1/PPIA	5
BP	GO:0019371	cyclooxygenase pathway	5/2365	11/18862	0.00740988	0.0489182	0.0377705	AKR1C3/PTGDS/PTGES3/CBR1/PTGES	5
BP	GO:0034975	protein folding in endoplasmic reticulum	5/2365	11/18862	0.00740988	0.0489182	0.0377705	ERO1A/P4HB/DNAJC3/CANX/HSPA5	5
BP	GO:0036363	transforming growth factor beta activation	5/2365	11/18862	0.00740988	0.0489182	0.0377705	HSP90AB1/FURIN/ITGB6/ITGAV/LTBP3	5
BP	GO:0039532	negative regulation of viral-induced cytoplasmic pattern recognition receptor signaling pathway	5/2365	11/18862	0.00740988	0.0489182	0.0377705	C1QBP/NPLOC4/RIOK3/UFD1/TSPAN6	5
BP	GO:0060788	ectodermal placode formation	5/2365	11/18862	0.00740988	0.0489182	0.0377705	HDAC2/TBX3/PROX1/SIX1/HDAC1	5
BP	GO:0070243	regulation of thymocyte apoptotic process	5/2365	11/18862	0.00740988	0.0489182	0.0377705	ADA/ZC3H8/TP53/ADAM8/HIF1A	5
BP	GO:0071696	ectodermal placode development	5/2365	11/18862	0.00740988	0.0489182	0.0377705	HDAC2/TBX3/PROX1/SIX1/HDAC1	5
BP	GO:0071697	ectodermal placode morphogenesis	5/2365	11/18862	0.00740988	0.0489182	0.0377705	HDAC2/TBX3/PROX1/SIX1/HDAC1	5
BP	GO:1903897	regulation of PERK-mediated unfolded protein response	5/2365	11/18862	0.00740988	0.0489182	0.0377705	AGR2/ABCA7/PPP1R15A/NCK1/HSPA5	5
BP	GO:1990440	positive regulation of transcription from RNA polymerase II promoter in response to endoplasmic reticulum stress	5/2365	11/18862	0.00740988	0.0489182	0.0377705	TP53/DDIT3/ATF3/CEBPB/HSPA5	5
BP	GO:0031669	cellular response to nutrient levels	39/2365	210/18862	0.00746045	0.0491982	0.0379867	IFI16/AQP3/AKR1C3/EIF2AK2/HNRNPA1/BCL2/PTN/LPL/CDKN2B/RRAGD/SLC2A1/RRAGA/JUN/UPP1/UCP2/EHMT2/CD68/TP53/TXN2/HSPA8/MAPK8/ATF3/DNAJC15/GBA/STK24/ATG5/NFE2L2/FOXO3/PRKAA1/XPR1/FES/MAPK3/ATP2B1/GCN1/COL1A1/ICAM1/XBP1/HSPA5/MAP1LC3B	39
BP	GO:0043523	regulation of neuron apoptotic process	37/2365	197/18862	0.00749242	0.0493551	0.0381079	NUPR1/HSP90AB1/PARP1/MYB/BCL2/ANGPT1/BTG2/CDC42/NAE1/MSH2/SIX1/JUN/RETREG1/TP53/NDNF/DDIT3/GBA/SOD1/ADAM8/CLCF1/FOXO3/BAX/HIF1A/CEBPB/CDC34/LGMN/GCLM/SET/PSEN1/MDK/GRN/ERBB3/EGLN3/G6PD/NQO1/CTNNB1/NQO2	37
BP	GO:1901607	alpha-amino acid biosynthetic process	16/2365	67/18862	0.00756692	0.0497372	0.0384029	PHGDH/SHMT1/APIP/MTAP/GLUL/SEPHS1/SHMT2/PYCR2/MTHFD1/BHMT2/ILVBL/PYCR1/SDSL/SEPHS2/PLOD3/PLOD2	16
BP	GO:1904377	positive regulation of protein localization to cell periphery	16/2365	67/18862	0.00756692	0.0497372	0.0384029	AGR2/RACK1/KIF5B/RAB11A/LGALS3/ITGA3/SQSTM1/CIB1/PIK3R1/AKT1/SPTBN1/EPHA2/ARHGEF16/EZR/ARF6/RER1	16
CC	GO:0005925	focal adhesion	155/2433	416/19520	4.41317e-39	3.20837e-36	2.11832e-36	RPL5/RPS19/RPL18/RPL13A/RPS8/RPS18/GDI2/NPM1/RPL4/S100A7/RPS11/RPS14/HSPB1/CNN3/B2M/RPS9/HACD3/RPS2/RPS29/RHOB/RPS10/CD151/RPL10A/CD9/ANXA6/YWHAB/RPL8/CAV2/RPS13/HMGA1/CAV1/CDC42/PPP1CC/RPS7/ADAM9/P4HB/RPL22/CD81/SDCBP/RDX/HCK/CSRP2/PLAU/PLEC/MARCKS/ITGB2/ARPC5/ARHGEF2/HSPA9/RPLP1/YWHAQ/LMO7/ITGA3/HSPA1A/RPL19/RPS5/ITGA2/SVIL/RSU1/FBLIM1/MISP/RPL31/CD99/ACTR3/RPS16/RPL3/G3BP1/ITGB4/YWHAZ/TNS4/PDL…	155
CC	GO:0030055	cell-substrate junction	155/2433	423/19520	4.59423e-38	1.67e-35	1.10261e-35	RPL5/RPS19/RPL18/RPL13A/RPS8/RPS18/GDI2/NPM1/RPL4/S100A7/RPS11/RPS14/HSPB1/CNN3/B2M/RPS9/HACD3/RPS2/RPS29/RHOB/RPS10/CD151/RPL10A/CD9/ANXA6/YWHAB/RPL8/CAV2/RPS13/HMGA1/CAV1/CDC42/PPP1CC/RPS7/ADAM9/P4HB/RPL22/CD81/SDCBP/RDX/HCK/CSRP2/PLAU/PLEC/MARCKS/ITGB2/ARPC5/ARHGEF2/HSPA9/RPLP1/YWHAQ/LMO7/ITGA3/HSPA1A/RPL19/RPS5/ITGA2/SVIL/RSU1/FBLIM1/MISP/RPL31/CD99/ACTR3/RPS16/RPL3/G3BP1/ITGB4/YWHAZ/TNS4/PDL…	155
CC	GO:0044391	ribosomal subunit	91/2433	187/19520	6.07181e-34	1.4714e-31	9.7149e-32	RPL5/RPS12/RPS6/RPS19/RPL18/RPL13A/ISG15/RPL28/RPS8/RPS18/RPL11/RPL4/RPS27A/RPL35A/RPS26/RPS11/RPS14/RPL37/RPS9/RPS2/RPS29/RPSA/RPL18A/RPL24/RPS10/RPL10/RPL21/RPS23/RPL27A/RACK1/RPL10A/MRPL42/RPL8/RPL15/RPS13/RPL26/RPS7/RPS21/MRPS30/RPL22/EIF2A/RPL36AL/MRPL47/RPS20/RPLP1/RPL19/RPS5/MRPS35/MRPL44/RPL31/RPL35/MRPS22/MRPL19/RPS16/RPL32/RPL3/RPL14/RPS4Y1/MRPL3/MRPL37/MRPS9/DAP3/MRPS26/MRPL41/RPL7L1/M…	91
CC	GO:0005840	ribosome	103/2433	243/19520	8.73971e-32	1.58844e-29	1.04876e-29	RPL5/RPS12/RPS6/RPS19/RPL18/RPL13A/ISG15/RPL28/RPS8/RPS18/RPL11/RPL4/RPS27A/RPL35A/RPS26/RPS11/RPS14/RPL37/RPS9/EIF2AK2/RPS2/RPS29/RPSA/RPL18A/RPL24/RPS10/RPL10/RPL21/RPS23/RPL27A/RACK1/RPL10A/MRPL42/BTF3/RPL8/RPL15/RPS13/RPL26/RPS7/RPS21/APOD/MRPS30/RPL22/EIF2A/RPL36AL/MRPL47/RPS20/RPLP1/RPL19/RPS5/MRPS35/MRPL44/RPL31/RPL35/MRPS22/MRPL19/RPS16/RPL32/RPL3/RPL14/RPS4Y1/APEX1/MRPL3/MRPL37/MRPS9/DAP…	103
CC	GO:0022626	cytosolic ribosome	60/2433	107/19520	4.05245e-27	5.89226e-25	3.89035e-25	RPL5/RPS12/RPS6/RPS19/RPL18/RPL13A/ISG15/RPL28/RPS8/RPS18/RPL11/RPL4/RPS27A/RPL35A/RPS26/RPS11/RPS14/RPL37/RPS9/RPS2/RPS29/RPSA/RPL18A/RPL24/RPS10/RPL10/RPL21/RPS23/RPL27A/RPL10A/RPL8/RPL15/RPS13/RPL26/RPS7/RPS21/APOD/RPL22/EIF2A/RPL36AL/RPS20/RPLP1/RPL19/RPS5/RPL31/RPL35/RPS16/RPL32/RPL3/RPL14/RPS4Y1/RPL7L1/RPL38/RPS25/RPS28/RPLP2/RPL12/RPL26L1/RPL29/RPS27	60
CC	GO:0098798	mitochondrial protein-containing complex	93/2433	265/19520	1.00507e-21	1.21782e-19	8.0406e-20	UQCRH/C15orf48/ATP5F1C/NDUFB4/NDUFA9/NDUFS2/DMAC1/MRPL42/SLC25A6/NDUFA4L2/ATP5F1B/ATP5ME/IMMT/ATP5PB/MRPS30/CHCHD10/MRPL47/COX5A/ATP5MC3/HSPA9/NDUFV3/SDHB/NDUFB6/MRPS35/TOMM20/MRPL44/NDUFA4/VDAC1/ATP5F1A/MRPS22/MRPL19/PHB2/TRMT10C/NDUFS5/UQCRC2/NDUFS3/MRPL3/TIMM10/MRPL37/MRPS9/DAP3/MRPS26/MRPL41/BCS1L/UQCRFS1/TIMM17A/NDUFS1/DNAJC15/HADHA/TIMM17B/MRPS10/MRPL22/TIMM50/PDK1/NDUFA2/NDUFA12/MRPL20/MRP…	93
CC	GO:0060205	cytoplasmic vesicle lumen	104/2433	326/19520	1.4953e-20	1.55298e-18	1.02535e-18	S100A11/S100P/EEF1A1/CSTB/HSP90AB1/TUBB/GDI2/FGB/S100A7/FGG/TIMP1/PSMB1/FTL/FGA/HSP90AA1/CDA/SRGN/B2M/XRCC5/LTF/LCN2/CCT2/OLA1/SERPING1/CFD/SERPINA1/ILF2/NPC2/TMSB4X/DYNLT1/HMGB1/ADA/PSMD14/QSOX1/PSMA5/PA2G4/SDCBP/FAM3C/C3/ARPC5/SLPI/GYG1/TCN1/CTSD/CSNK2B/VEGFA/RNASET2/CDC37L1/GSTP1/S100A8/PROS1/VCP/TIMP2/GCA/ARSA/ANXA2/PSMD1/HSPA8/PDXK/PSMD7/NIT2/PSMD11/GNS/GPI/SELENOP/CCT8/PLAC8/PSMC3/GGH/HEBP2…	104
CC	GO:0034774	secretory granule lumen	103/2433	322/19520	1.8358e-20	1.66828e-18	1.10148e-18	S100A11/S100P/EEF1A1/CSTB/HSP90AB1/TUBB/GDI2/FGB/S100A7/FGG/TIMP1/PSMB1/FTL/FGA/HSP90AA1/CDA/SRGN/B2M/XRCC5/LTF/LCN2/CCT2/OLA1/SERPING1/CFD/SERPINA1/ILF2/NPC2/TMSB4X/DYNLT1/HMGB1/PSMD14/QSOX1/PSMA5/PA2G4/SDCBP/FAM3C/C3/ARPC5/SLPI/GYG1/TCN1/CTSD/CSNK2B/VEGFA/RNASET2/CDC37L1/GSTP1/S100A8/PROS1/VCP/TIMP2/GCA/ARSA/ANXA2/PSMD1/HSPA8/PDXK/PSMD7/NIT2/PSMD11/GNS/GPI/SELENOP/CCT8/PLAC8/PSMC3/GGH/HEBP2/ALD…	103
CC	GO:0031983	vesicle lumen	104/2433	328/19520	2.488e-20	2.00975e-18	1.32693e-18	S100A11/S100P/EEF1A1/CSTB/HSP90AB1/TUBB/GDI2/FGB/S100A7/FGG/TIMP1/PSMB1/FTL/FGA/HSP90AA1/CDA/SRGN/B2M/XRCC5/LTF/LCN2/CCT2/OLA1/SERPING1/CFD/SERPINA1/ILF2/NPC2/TMSB4X/DYNLT1/HMGB1/ADA/PSMD14/QSOX1/PSMA5/PA2G4/SDCBP/FAM3C/C3/ARPC5/SLPI/GYG1/TCN1/CTSD/CSNK2B/VEGFA/RNASET2/CDC37L1/GSTP1/S100A8/PROS1/VCP/TIMP2/GCA/ARSA/ANXA2/PSMD1/HSPA8/PDXK/PSMD7/NIT2/PSMD11/GNS/GPI/SELENOP/CCT8/PLAC8/PSMC3/GGH/HEBP2…	104
CC	GO:0015934	large ribosomal subunit	54/2433	115/19520	8.93899e-20	6.49865e-18	4.29071e-18	RPL5/RPL18/RPL13A/RPL28/RPL11/RPL4/RPL35A/RPL37/RPL18A/RPL24/RPL10/RPL21/RPL27A/RPL10A/MRPL42/RPL8/RPL15/RPL26/MRPS30/RPL22/RPL36AL/MRPL47/RPLP1/RPL19/MRPL44/RPL31/RPL35/MRPL19/RPL32/RPL3/RPL14/MRPL3/MRPL37/MRPL41/RPL7L1/MRPL22/MRPL20/RPL38/MRPL57/MRPL40/MRPL30/MRPL9/MRPL36/MRPL16/RPLP2/MRPS18A/RPL12/RPL26L1/MRPL51/MRPL33/RPL29/MRPL52/MRPL54/MRPL12	54
CC	GO:0042470	melanosome	49/2433	106/19520	1.01515e-17	6.15012e-16	4.0606e-16	HSP90AB1/HSP90AA1/CCT4/CTSB/RAN/ANXA6/CD63/GCHFR/YWHAB/STOM/P4HB/SLC2A1/SDCBP/AHCY/ATP1B3/CALU/ERP29/NAP1L1/CTSD/CNP/DTNBP1/YWHAZ/YWHAE/ANXA2/HSPA8/LAMP1/TMED10/TPP1/RAB2A/GGH/SYTL1/CLTC/ATP6V1B2/ANXA11/PRDX1/PDIA4/MMP14/GANAB/NCSTN/SYPL1/RAC1/RAB9A/BSG/RAB5A/PPIB/RPN1/CANX/SLC3A2/HSPA5	49
CC	GO:0048770	pigment granule	49/2433	106/19520	1.01515e-17	6.15012e-16	4.0606e-16	HSP90AB1/HSP90AA1/CCT4/CTSB/RAN/ANXA6/CD63/GCHFR/YWHAB/STOM/P4HB/SLC2A1/SDCBP/AHCY/ATP1B3/CALU/ERP29/NAP1L1/CTSD/CNP/DTNBP1/YWHAZ/YWHAE/ANXA2/HSPA8/LAMP1/TMED10/TPP1/RAB2A/GGH/SYTL1/CLTC/ATP6V1B2/ANXA11/PRDX1/PDIA4/MMP14/GANAB/NCSTN/SYPL1/RAC1/RAB9A/BSG/RAB5A/PPIB/RPN1/CANX/SLC3A2/HSPA5	49
CC	GO:0015935	small ribosomal subunit	39/2433	74/19520	7.44075e-17	4.1611e-15	2.74736e-15	RPS12/RPS6/RPS19/ISG15/RPS8/RPS18/RPS27A/RPS26/RPS11/RPS14/RPS9/RPS2/RPS29/RPSA/RPS10/RPS23/RACK1/MRPL42/RPS13/RPS7/RPS21/EIF2A/RPS20/RPS5/MRPS35/MRPS22/RPS16/RPS4Y1/MRPS9/DAP3/MRPS26/MRPS10/RPS25/RPS28/MRPS18A/MRPS28/MRPS33/RPS27/MRPS7	39
CC	GO:0005681	spliceosomal complex	68/2433	191/19520	1.28346e-16	6.46761e-15	4.27022e-15	YBX1/IVNS1ABP/SNRPE/HNRNPF/HNRNPA3/HNRNPA1/SRRM1/SNRPD1/SNRPD2/ZMAT2/IK/RBM17/SF3A3/RBMX/CDC40/MAGOH/PRPF40A/CDC5L/PRPF31/RBM22/SYNCRIP/MAGOHB/LGALS3/SF3B5/PPIH/HTATSF1/HNRNPM/SNRPF/SNRPD3/PRPF38A/WBP11/HNRNPR/NCL/CWC27/SLU7/SNRPA/SYF2/HNRNPC/HSPA8/CRNKL1/HNRNPK/PRPF38B/RBMXL1/SF3B3/ISY1/SF3B1/PLRG1/HNRNPU/LSM2/SNRPB2/PRPF19/PRPF18/USP39/SNRPG/PRPF4B/RBM8A/SNRPC/API5/SNRNP70/DDX5/HNRNPA2B1/PRPF6/…	68
CC	GO:0005743	mitochondrial inner membrane	128/2433	493/19520	1.33444e-16	6.46761e-15	4.27022e-15	IFI6/UQCRH/C15orf48/HSPD1/ATP5F1C/NDUFAF4/NDUFB4/NDUFA9/COQ3/COX6B1/NDUFS2/DMAC1/MRPL42/SLC25A33/SLC25A6/NDUFA4L2/ATP5F1B/ATP5ME/IMMT/ATP5PB/MRPS30/CHCHD10/COX7A2/MRPL47/COX5A/STOML2/LGALS3/ATP5MC3/TMEM11/HSPA9/NDUFV3/SDHB/MTCH2/MPC1/YME1L1/NDUFB6/COQ8A/ATAD3A/UCP2/MRPS35/MRPL44/NDUFA4/ATP5F1A/MRPS22/MRPL19/PHB2/CNP/GCAT/SLC25A5/NDUFS5/TRAP1/SHMT2/SLC25A1/UQCRC2/NDUFS3/MRPL3/TIMM10/MRPL37/MRPS9/D…	128
CC	GO:0071013	catalytic step 2 spliceosome	41/2433	87/19520	2.01016e-15	9.13366e-14	6.03048e-14	SNRPE/HNRNPF/HNRNPA3/HNRNPA1/SRRM1/SNRPD1/SNRPD2/SF3A3/RBMX/CDC40/MAGOH/CDC5L/RBM22/SYNCRIP/MAGOHB/HNRNPM/SNRPF/SNRPD3/HNRNPR/CWC27/SLU7/SYF2/HNRNPC/CRNKL1/HNRNPK/SF3B3/ISY1/SF3B1/PLRG1/HNRNPU/LSM2/SNRPB2/PRPF19/SNRPG/PRPF4B/RBM8A/DDX5/HNRNPA2B1/PRPF6/ESS2/PNN	41
CC	GO:0022625	cytosolic large ribosomal subunit	32/2433	57/19520	3.98385e-15	1.70368e-13	1.12485e-13	RPL5/RPL18/RPL13A/RPL28/RPL11/RPL4/RPL35A/RPL37/RPL18A/RPL24/RPL10/RPL21/RPL27A/RPL10A/RPL8/RPL15/RPL26/RPL22/RPL36AL/RPLP1/RPL19/RPL31/RPL35/RPL32/RPL3/RPL14/RPL7L1/RPL38/RPLP2/RPL12/RPL26L1/RPL29	32
CC	GO:1904813	ficolin-1-rich granule lumen	49/2433	124/19520	2.18832e-14	8.83837e-13	5.83551e-13	EEF1A1/CSTB/HSP90AB1/PSMB1/HSP90AA1/CDA/CTSB/CFD/COMMD3/SERPINA1/ILF2/CST3/DYNLT1/HMGB1/PSMD14/PSMA5/ARPC5/GYG1/HSPA1A/CTSD/CSNK2B/GSTP1/CALML5/VCP/TIMP2/HSPA8/PSMD7/PSMD11/GNS/GPI/CCT8/PSMC3/ALDOA/OSTF1/PSMD6/GSN/PSMD2/HSPA6/PYGL/HBB/PSMD3/EEF2/MVP/PRDX4/CTSS/CANT1/MIF/PPIA/GLB1	49
CC	GO:0005766	primary lysosome	55/2433	155/19520	1.21152e-13	4.3782e-12	2.8907e-12	TUBB/GDI2/S100A7/FTL/CCT2/NPC2/CD63/STOM/PA2G4/SDCBP/C3/CEACAM6/SURF4/RNASET2/CD68/VCP/GCA/ARSA/ANXA2/PSMD1/LAMP1/PRCP/GNS/LPCAT1/CCT8/BST2/PLAC8/GGH/HEBP2/AGA/GLA/BRI3/ANXA11/ARHGAP45/CAP1/FUCA1/LYZ/DPP7/NDUFC2/GLIPR1/CKAP4/B4GALT1/LAMTOR1/CTSA/SNAP29/TOM1/MGST1/PSEN1/NCSTN/GRN/DNAJC3/MAGT1/GLB1/VAT1/TMEM179B	55
CC	GO:0042582	azurophil granule	55/2433	155/19520	1.21152e-13	4.3782e-12	2.8907e-12	TUBB/GDI2/S100A7/FTL/CCT2/NPC2/CD63/STOM/PA2G4/SDCBP/C3/CEACAM6/SURF4/RNASET2/CD68/VCP/GCA/ARSA/ANXA2/PSMD1/LAMP1/PRCP/GNS/LPCAT1/CCT8/BST2/PLAC8/GGH/HEBP2/AGA/GLA/BRI3/ANXA11/ARHGAP45/CAP1/FUCA1/LYZ/DPP7/NDUFC2/GLIPR1/CKAP4/B4GALT1/LAMTOR1/CTSA/SNAP29/TOM1/MGST1/PSEN1/NCSTN/GRN/DNAJC3/MAGT1/GLB1/VAT1/TMEM179B	55
CC	GO:0022627	cytosolic small ribosomal subunit	27/2433	46/19520	1.26468e-13	4.3782e-12	2.8907e-12	RPS12/RPS6/RPS19/ISG15/RPS8/RPS18/RPS27A/RPS26/RPS11/RPS14/RPS9/RPS2/RPS29/RPSA/RPS10/RPS23/RPS13/RPS7/RPS21/EIF2A/RPS20/RPS5/RPS16/RPS4Y1/RPS25/RPS28/RPS27	27
CC	GO:0101002	ficolin-1-rich granule	61/2433	185/19520	2.48519e-13	8.21241e-12	5.42223e-12	EEF1A1/CSTB/HSP90AB1/PSMB1/HSP90AA1/CDA/CTSB/CFD/COMMD3/SERPINA1/ILF2/CST3/DYNLT1/CD55/HMGB1/PSMD14/PSMA5/LGALS3/ITGB2/ARPC5/GYG1/HSPA1A/CTSD/CSNK2B/GSTP1/CALML5/VCP/TIMP2/HSPA8/LAMP1/PRCP/PSMD7/PSMD11/GNS/GPI/CCT8/PSMC3/ALDOA/ADAM8/TCIRG1/OSTF1/PSMD6/GSN/PSMD2/SLC11A1/HSPA6/PYGL/HBB/PSMD3/EEF2/MVP/PRDX4/CTSS/LAMTOR1/CANT1/MIF/PPIA/RAC1/GLB1/UBR4/TMEM179B	61
CC	GO:0070469	respirasome	41/2433	103/19520	2.1513e-12	6.6075e-11	4.36259e-11	UQCRH/C15orf48/NDUFB4/NDUFA9/COX6B1/NDUFS2/DMAC1/NDUFA4L2/COX7A2/COX5A/NDUFV3/SDHB/NDUFB6/NDUFA4/NDUFS5/UQCRC2/NDUFS3/COA6/BCS1L/UQCRFS1/NDUFS1/SURF1/NDUFA2/NDUFA12/COX7A2L/NDUFC1/STMP1/NDUFS6/COX7B/CYC1/COX7C/HIGD2A/NDUFA3/NDUFC2/UQCR11/COX6A1/NDUFB5/NDUFS8/RAB5IF/NDUFB10/NDUFB1	41
CC	GO:0098800	inner mitochondrial membrane protein complex	50/2433	142/19520	2.18129e-12	6.6075e-11	4.36259e-11	UQCRH/C15orf48/ATP5F1C/NDUFB4/NDUFA9/NDUFS2/DMAC1/SLC25A6/NDUFA4L2/ATP5F1B/ATP5ME/IMMT/ATP5PB/CHCHD10/COX5A/ATP5MC3/HSPA9/NDUFV3/SDHB/NDUFB6/NDUFA4/ATP5F1A/PHB2/NDUFS5/UQCRC2/NDUFS3/TIMM10/BCS1L/UQCRFS1/TIMM17A/NDUFS1/DNAJC15/TIMM17B/TIMM50/NDUFA2/NDUFA12/NDUFC1/NDUFS6/ROMO1/CYC1/COX7C/NDUFA3/NDUFC2/COX6A1/NDUFB5/NDUFS8/IMMP2L/ATP5MG/NDUFB10/NDUFB1	50
CC	GO:0140534	endoplasmic reticulum protein-containing complex	46/2433	127/19520	5.26689e-12	1.50611e-10	9.94406e-11	TAP1/ATP5F1C/B2M/SPTSSA/SRP9/INSIG1/ATP5F1B/P4HB/TAP2/VCP/OST4/SEC61B/SPCS1/SEC61G/SPCS3/SEC63/OSTC/NPLOC4/DPM2/PIGT/KRTCAP2/AMFR/SSR4/SRPRA/SELENOS/UBXN1/HYOU1/STT3A/RHBDD2/PIGP/SEL1L/HLA-A/GANAB/ORMDL2/DAD1/MAGT1/SEC61A1/UFD1/EMC10/GPAA1/EMC7/PYURF/RPN1/HM13/SPCS2/HSPA5	46
CC	GO:0005746	mitochondrial respirasome	37/2433	89/19520	5.38637e-12	1.50611e-10	9.94406e-11	UQCRH/C15orf48/NDUFB4/NDUFA9/NDUFS2/DMAC1/NDUFA4L2/COX7A2/COX5A/NDUFV3/SDHB/NDUFB6/NDUFA4/NDUFS5/UQCRC2/NDUFS3/BCS1L/UQCRFS1/NDUFS1/SURF1/NDUFA2/NDUFA12/COX7A2L/NDUFC1/STMP1/NDUFS6/COX7B/CYC1/COX7C/NDUFA3/NDUFC2/COX6A1/NDUFB5/NDUFS8/RAB5IF/NDUFB10/NDUFB1	37
CC	GO:0005765	lysosomal membrane	94/2433	378/19520	2.15436e-11	5.59365e-10	3.6932e-10	HLA-DRA/EEF1A1/HSP90AB1/CD74/HLA-DRB1/HLA-DPA1/HLA-DPB1/HLA-DMA/IFITM3/CLTA/RNF183/ANXA6/CD63/STOM/TSPAN1/RRAGA/COL6A1/CEACAM6/MFSD12/HLA-DMB/SLC7A5/HLA-DQB1/AP2S1/GPR137B/CTSD/SURF4/CD68/TMEM165/HGSNAT/ATP11A/GNAI3/ATRAID/ANXA2/HSPA8/LAMP1/PRCP/TMBIM1/AP2M1/GBA/LPCAT1/SCARB2/MYO6/BST2/RAB2A/CCZ1/LAPTM4B/TCIRG1/ATP6V1G1/CLTC/AHNAK/BRI3/ATP6V1B2/GLMP/HLA-F/TMEM63A/CD164/P2RX4/CLCN3/AP3D1/NDUFC2/GL…	94
CC	GO:0098852	lytic vacuole membrane	94/2433	378/19520	2.15436e-11	5.59365e-10	3.6932e-10	HLA-DRA/EEF1A1/HSP90AB1/CD74/HLA-DRB1/HLA-DPA1/HLA-DPB1/HLA-DMA/IFITM3/CLTA/RNF183/ANXA6/CD63/STOM/TSPAN1/RRAGA/COL6A1/CEACAM6/MFSD12/HLA-DMB/SLC7A5/HLA-DQB1/AP2S1/GPR137B/CTSD/SURF4/CD68/TMEM165/HGSNAT/ATP11A/GNAI3/ATRAID/ANXA2/HSPA8/LAMP1/PRCP/TMBIM1/AP2M1/GBA/LPCAT1/SCARB2/MYO6/BST2/RAB2A/CCZ1/LAPTM4B/TCIRG1/ATP6V1G1/CLTC/AHNAK/BRI3/ATP6V1B2/GLMP/HLA-F/TMEM63A/CD164/P2RX4/CLCN3/AP3D1/NDUFC2/GL…	94
CC	GO:0030134	COPII-coated ER to Golgi transport vesicle	37/2433	94/19520	3.74082e-11	9.37785e-10	6.1917e-10	HLA-B/HLA-DRA/CD74/HLA-DRB1/HLA-DPA1/HLA-DPB1/AREG/B2M/HLA-C/SERPINA1/HLA-E/TMED3/HLA-DQB1/YIF1A/TMED4/PEF1/TMED10/SEC24D/SEC16A/TMED2/HLA-F/ERGIC2/SEC31A/TMED1/SEC23A/TMED9/TGFA/HLA-A/CD59/IER3IP1/GOLGA2/YIPF6/LMAN1/PDCD6/VTI1B/USO1/SEC13	37
CC	GO:0016607	nuclear speck	98/2433	411/19520	1.03328e-10	2.50397e-09	1.65324e-09	IFI16/TRIM22/BASP1/SRRM1/IK/SRSF3/PPP1CC/SRSF10/SDCBP2/SF3A3/ALKBH5/CDC40/MAGOH/PRPF40A/CDC5L/PRPF31/C12orf57/EPAS1/SRSF7/HAUS6/MORF4L1/PPIH/WTAP/HSPA1A/PNISR/SFPQ/BCLAF1/TAP2/NAMPT/SMC4/EHMT2/SLU7/CSNK1A1/KAZN/GCAT/PLCB1/BARD1/CNOT7/APEX1/SRPK1/SYF2/THRAP3/CRNKL1/CIR1/THAP7/TOPORS/SDE2/PPIG/SRSF2/WAC/SF3B1/FNBP4/CPSF6/PLRG1/HNRNPU/CCNL1/SUMO1/TIMM50/SNRPB2/PRPF19/PRPF18/DDX46/MBD4/DDX39A/TCERG1/…	98
CC	GO:0005684	U2-type spliceosomal complex	36/2433	93/19520	1.2019e-10	2.81866e-09	1.86101e-09	SNRPE/SNRPD1/SNRPD2/ZMAT2/IK/SF3A3/CDC40/PRPF40A/CDC5L/PRPF31/RBM22/MAGOHB/SF3B5/HTATSF1/SNRPF/SNRPD3/PRPF38A/CWC27/SYF2/CRNKL1/SF3B3/ISY1/SF3B1/PLRG1/LSM2/SNRPB2/PRPF19/PRPF18/SNRPG/RBM8A/SNRPC/SNRNP70/PRPF6/SNU13/CCDC12/LSM5	36
CC	GO:0098803	respiratory chain complex	34/2433	87/19520	2.89432e-10	6.57552e-09	4.34147e-09	UQCRH/C15orf48/NDUFB4/NDUFA9/COX6B1/NDUFS2/DMAC1/NDUFA4L2/COX5A/NDUFV3/SDHB/NDUFB6/NDUFA4/NDUFS5/UQCRC2/NDUFS3/COA6/BCS1L/UQCRFS1/NDUFS1/NDUFA2/NDUFA12/NDUFC1/NDUFS6/COX7B/CYC1/COX7C/NDUFA3/NDUFC2/COX6A1/NDUFB5/NDUFS8/NDUFB10/NDUFB1	34
CC	GO:0005791	rough endoplasmic reticulum	31/2433	75/19520	3.33723e-10	7.35201e-09	4.85415e-09	RPL18/RPL4/RPS26/RPS29/SRP9/CDKAL1/RPS23/PTGDS/RPS21/STAU1/SCGB1A1/SLC7A11/TMEM97/SEC61B/SEC61G/LRPAP1/EDN1/SEC63/RPS28/SSR4/SRPRA/PLOD3/CKAP4/SEC62/NUCB1/PSEN1/SEC61A1/UBA1/RPN1/HM13/PLOD2	31
CC	GO:0005844	polysome	29/2433	68/19520	5.05438e-10	1.08075e-08	7.1356e-09	RPS6/RPL18/RPL11/RPS26/RPS29/RPL18A/RPL24/RPS23/RPL10A/BTF3/RPL8/RPS21/LARP6/RPL19/RWDD1/DRG1/RPL31/RPL32/FXR1/RPS4Y1/VBP1/PSMA1/RPL38/RPS28/UPF2/PNPT1/EEF2/GCN1/HDLBP	29
CC	GO:0005774	vacuolar membrane	99/2433	431/19520	7.391e-10	1.53522e-08	1.01362e-08	HLA-DRA/EEF1A1/HSP90AB1/CD74/HLA-DRB1/HLA-DPA1/HLA-DPB1/HLA-DMA/IFITM3/CLTA/RNF183/ANXA6/CD63/YWHAB/STOM/RRAGD/TSPAN1/RRAGA/COL6A1/CEACAM6/MFSD12/HLA-DMB/SLC7A5/HLA-DQB1/AP2S1/GPR137B/CTSD/SURF4/CD68/TMEM165/HGSNAT/ATP11A/GNAI3/ATRAID/ANXA2/HSPA8/LAMP1/PRCP/TMBIM1/AP2M1/GBA/LPCAT1/SCARB2/MYO6/ATP6V1F/BST2/RAB2A/CCZ1/LAPTM4B/TCIRG1/ATP6V1G1/CLTC/AHNAK/BRI3/ATP6V1B2/GLMP/HLA-F/TMEM63A/CD164/P2RX4/C…	99
CC	GO:0012507	ER to Golgi transport vesicle membrane	27/2433	62/19520	1.13044e-09	2.28286e-08	1.50725e-08	HLA-B/HLA-DRA/CD74/HLA-DRB1/HLA-DPA1/HLA-DPB1/AREG/B2M/HLA-C/HLA-E/HLA-DQB1/PEF1/TMED10/SEC24D/SEC16A/TMED2/HLA-F/SEC31A/SEC23A/TGFA/HLA-A/CD59/LMAN1/PDCD6/VTI1B/USO1/SEC13	27
CC	GO:0005759	mitochondrial matrix	106/2433	476/19520	1.19218e-09	2.34247e-08	1.54661e-08	IDH2/HSPD1/ATP5F1C/HSPE1/OXCT1/NDUFA9/SUCLG1/COQ3/NDUFS2/MRPL42/FH/ALDH7A1/ACADSB/ATP5F1B/AK3/ATP5PB/MRPS30/RARS2/MRPL47/IDH3B/ALDH1B1/HSPA9/CHPF/ATAD3A/MRPS35/MRPL44/ACADM/TRMT61B/VDAC1/FXN/ATP5F1A/MRPS22/MRPL19/LACTB2/HADH/TP53/IDH3G/AKR1B15/SLC25A5/TRMT10C/TRAP1/MTHFD2/SHMT2/TXN2/NDUFS3/MRPL3/GSR/ECHS1/MRPL37/MRPS9/AK4/DAP3/PYCR2/MRPS26/HIBCH/MRPL41/NDUFS1/ARL2BP/DNAJC15/C1QBP/TXNRD2/HADHA/IDH…	106
CC	GO:0030135	coated vesicle	74/2433	295/19520	1.92049e-09	3.66185e-08	2.41773e-08	HLA-B/HLA-DRA/CD74/HLA-DRB1/HLA-DPA1/HLA-DPB1/HSPD1/AREG/B2M/CLTA/HLA-C/SERPINA1/SNX3/CD9/FURIN/HLA-E/TMED3/SFTPB/HLA-DQB1/AP2S1/YIF1A/TMED4/HSPA8/EDN1/REEP6/AP2M1/PEF1/TMED10/SCARB2/MYO6/SEC24D/SNX9/SEC16A/MALL/PICALM/KDELR2/TMED2/CLTC/EREG/HLA-F/ERGIC2/SPG21/SCAMP1/SEC31A/KDELR3/GPR107/TMED1/FZD5/CLTB/MYO1E/SEC23A/COPB2/TMED9/ARF1/DVL1/TGFA/RAB13/HLA-A/CD59/IER3IP1/GOLGA2/YIPF6/AP1S1/LMAN1/PDCD…	74
CC	GO:0005775	vacuolar lumen	51/2433	173/19520	1.9644e-09	3.66185e-08	2.41773e-08	CD74/TUBB/GDI2/S100A7/FTL/HSP90AA1/CTSL/CCT2/CTSB/NPC2/SDC1/PA2G4/SDCBP/C3/GYG1/CTSD/RNASET2/VCP/GCA/ARSA/ANXA2/PSMD1/HSPA8/HYAL1/EPDR1/GNS/GBA/TPP1/SCARB2/AGRN/CCT8/PLAC8/GGH/HEBP2/CTSV/AGA/GLA/CHID1/ARHGAP45/CAP1/FUCA1/LYZ/LGMN/DPP7/SDC4/CTSS/CTSA/GRN/DNAJC3/GLB1/VAT1	51
CC	GO:0042788	polysomal ribosome	18/2433	32/19520	4.11557e-09	7.48005e-08	4.93868e-08	RPL18/RPL11/RPS26/RPS29/RPL18A/RPL24/RPS23/RPL10A/BTF3/RPL8/RPS21/RPL19/RPL31/RPL32/RPL38/RPS28/PNPT1/EEF2	18
CC	GO:1905368	peptidase complex	33/2433	92/19520	6.83594e-09	1.21213e-07	8.00306e-08	PSMB9/F3/PSMB1/HSPB1/PSMB8/PSMA4/PSMC4/PSMA7/PSME2/PSME1/PSMD14/PSMA5/PSMB2/PSMA3/PSMD8/VCP/PSMD1/SPCS1/PSMD7/SPCS3/PSMD4/PSMA1/PSMD11/PSMC3/USP22/PIGT/PSMD6/PSMD2/PSMD3/ADRM1/TAF6/GPAA1/SPCS2	33
CC	GO:1905369	endopeptidase complex	27/2433	68/19520	1.2926e-08	2.23743e-07	1.47726e-07	PSMB9/PSMB1/HSPB1/PSMB8/PSMA4/PSMC4/PSMA7/PSME2/PSME1/PSMD14/PSMA5/PSMB2/PSMA3/PSMD8/VCP/PSMD1/PSMD7/PSMD4/PSMA1/PSMD11/PSMC3/PIGT/PSMD6/PSMD2/PSMD3/ADRM1/GPAA1	27
CC	GO:0035578	azurophil granule lumen	32/2433	91/19520	2.00323e-08	3.38685e-07	2.23616e-07	TUBB/GDI2/S100A7/FTL/CCT2/NPC2/PA2G4/SDCBP/C3/RNASET2/VCP/GCA/ARSA/ANXA2/PSMD1/GNS/CCT8/PLAC8/GGH/HEBP2/AGA/GLA/ARHGAP45/CAP1/FUCA1/LYZ/DPP7/CTSA/GRN/DNAJC3/GLB1/VAT1	32
CC	GO:0000313	organellar ribosome	31/2433	87/19520	2.32633e-08	3.75832e-07	2.48142e-07	MRPL42/MRPS30/MRPL47/MRPS35/MRPL44/MRPS22/MRPL19/MRPL3/MRPL37/MRPS9/DAP3/MRPS26/MRPL41/MRPS10/MRPL22/MRPL20/MRPL57/MRPL40/MRPL30/MRPL9/MRPL36/MRPL16/MRPS18A/MRPL51/MRPL33/MRPS28/MRPS33/MRPL52/MRPL54/MRPS7/MRPL12	31
CC	GO:0005761	mitochondrial ribosome	31/2433	87/19520	2.32633e-08	3.75832e-07	2.48142e-07	MRPL42/MRPS30/MRPL47/MRPS35/MRPL44/MRPS22/MRPL19/MRPL3/MRPL37/MRPS9/DAP3/MRPS26/MRPL41/MRPS10/MRPL22/MRPL20/MRPL57/MRPL40/MRPL30/MRPL9/MRPL36/MRPL16/MRPS18A/MRPL51/MRPL33/MRPS28/MRPS33/MRPL52/MRPL54/MRPS7/MRPL12	31
CC	GO:0000502	proteasome complex	25/2433	62/19520	3.07741e-08	4.86365e-07	3.21121e-07	PSMB9/PSMB1/HSPB1/PSMB8/PSMA4/PSMC4/PSMA7/PSME2/PSME1/PSMD14/PSMA5/PSMB2/PSMA3/PSMD8/VCP/PSMD1/PSMD7/PSMD4/PSMA1/PSMD11/PSMC3/PSMD6/PSMD2/PSMD3/ADRM1	25
CC	GO:0030133	transport vesicle	89/2433	402/19520	3.3819e-08	5.23115e-07	3.45386e-07	SFTA2/HLA-B/HLA-DRA/CD74/HLA-DRB1/HLA-DPA1/HLA-DPB1/AREG/B2M/DPYSL3/KIF1A/CLTA/SYNGR2/HLA-C/CPE/CAV2/CD55/FURIN/HLA-E/MCTP1/RAB4A/HCK/RAB11A/SYT8/TMED3/HLA-DQB1/ERP29/SURF4/CEACAM1/VDAC1/DTNBP1/SPX/TMEM184A/CALM3/LAMP1/EDN1/FGFR3/CHP1/PEF1/TMED10/FGFRL1/SEC24D/SEC16A/SYTL1/PICALM/KDELR2/TMED2/CLTC/PAM/HLA-F/SPG21/SCAMP1/SEC31A/KDELR3/CLTB/SIPA1/SEC23A/COPB2/TMED9/CLCN3/APH1A/YKT6/YIPF2/CDK16/TGFA…	89
CC	GO:0030662	coated vesicle membrane	50/2433	182/19520	3.63638e-08	5.50761e-07	3.63638e-07	HLA-B/HLA-DRA/CD74/HLA-DRB1/HLA-DPA1/HLA-DPB1/AREG/B2M/CLTA/HLA-C/CD9/HLA-E/TMED3/HLA-DQB1/AP2S1/HSPA8/REEP6/AP2M1/PEF1/TMED10/SCARB2/MYO6/SEC24D/SEC16A/PICALM/KDELR2/TMED2/CLTC/EREG/HLA-F/SEC31A/KDELR3/FZD5/CLTB/SEC23A/COPB2/TGFA/HLA-A/CD59/AP1S1/LMAN1/PDCD6/COPZ1/HIP1R/VTI1B/USO1/TGOLN2/RAB5A/SEC13/AP2A1	50
CC	GO:0030176	integral component of endoplasmic reticulum membrane	45/2433	157/19520	4.37969e-08	6.49803e-07	4.29031e-07	HLA-B/HLA-DRA/CD74/HLA-DRB1/HLA-DPA1/HLA-DPB1/TAP1/B2M/HACD3/HLA-C/RNF183/HLA-E/INSIG1/RETREG1/TRAM1/HLA-DQB1/TAP2/SPCS1/SGMS2/DPM2/PIGT/AMFR/RCE1/HLA-F/SCD/SELENOS/TMCO1/RHBDD2/SEC62/SARAF/ELOVL1/HLA-A/TM7SF2/DPM3/RRBP1/SEC61A1/SLC35B2/EMC10/SPPL2A/BCAP31/GPAA1/EMC7/HM13/CANX/HSPA5	45
CC	GO:0098576	lumenal side of membrane	18/2433	36/19520	4.82342e-08	7.01326e-07	4.63049e-07	HLA-B/HLA-DRA/CD74/HLA-DRB1/HLA-DPA1/HLA-DPB1/HLA-C/HLA-E/HLA-DQB1/HSPA8/HLA-F/NUCB1/CTSA/HLA-A/SPPL2A/BCAP31/HM13/CANX	18
CC	GO:0031227	intrinsic component of endoplasmic reticulum membrane	46/2433	165/19520	7.81257e-08	1.11367e-06	7.35301e-07	HLA-B/HLA-DRA/CD74/HLA-DRB1/HLA-DPA1/HLA-DPB1/TAP1/B2M/HACD3/HLA-C/RNF183/HLA-E/INSIG1/RETREG1/TRAM1/HLA-DQB1/TAP2/ESYT2/SPCS1/SGMS2/DPM2/PIGT/AMFR/RCE1/HLA-F/SCD/SELENOS/TMCO1/RHBDD2/SEC62/SARAF/ELOVL1/HLA-A/TM7SF2/DPM3/RRBP1/SEC61A1/SLC35B2/EMC10/SPPL2A/BCAP31/GPAA1/EMC7/HM13/CANX/HSPA5	46
CC	GO:0030684	preribosome	28/2433	78/19520	9.15211e-08	1.27953e-06	8.4481e-07	FBL/XRCC5/NOP58/IMP4/RPS7/WDR12/WDR3/NOC2L/MPHOSPH10/ZNF622/SRFBP1/UTP11/UTP4/NOP56/NOB1/RPF1/DCAF13/NOL10/BMS1/KRR1/BYSL/MRTO4/RSL1D1/NSA2/SNU13/FAM207A/RIOK3/RRP7A	28
CC	GO:0071011	precatalytic spliceosome	22/2433	53/19520	1.10946e-07	1.52184e-06	1.00479e-06	SNRPE/SNRPD1/SNRPD2/ZMAT2/IK/SF3A3/PRPF31/MAGOHB/SF3B5/SNRPF/SNRPD3/PRPF38A/CWC27/PRPF38B/SF3B3/SF3B1/LSM2/SNRPB2/SNRPG/PRPF6/SNU13/LSM5	22
CC	GO:0022624	proteasome accessory complex	14/2433	24/19520	1.21552e-07	1.63645e-06	1.08046e-06	PSMC4/PSME2/PSME1/PSMD14/PSMD8/PSMD1/PSMD7/PSMD4/PSMD11/PSMC3/PSMD6/PSMD2/PSMD3/ADRM1	14
CC	GO:0031301	integral component of organelle membrane	82/2433	371/19520	1.25101e-07	1.65361e-06	1.09179e-06	HLA-B/HLA-DRA/CD74/HLA-DRB1/HLA-DPA1/HLA-DPB1/TAP1/B2M/HACD3/HLA-C/RNF183/FURIN/HLA-E/INSIG1/IMMT/QSOX1/CHCHD10/PEX26/TMEM11/RETREG1/HSPA9/BNIP3/TRAM1/PEX3/HLA-DQB1/FIS1/MPC1/BAK1/TAP2/YIF1A/TOMM20/SPCS1/SLC25A3/LAMP1/TIMM17A/VAMP5/SGMS2/TIMM17B/GALNT2/DPM2/PIGT/AMFR/RCE1/HLA-F/LBR/P2RX4/SCD/FUNDC2/CLSTN1/SELENOS/TMCO1/SLC35A2/CSGALNACT1/BET1L/ARMCX3/RHBDD2/SEC62/SARAF/ELOVL1/HLA-A/IER3IP1/BET1/T…	82
CC	GO:0031300	intrinsic component of organelle membrane	87/2433	402/19520	1.40756e-07	1.82732e-06	1.20648e-06	HLA-B/HLA-DRA/CD74/HLA-DRB1/HLA-DPA1/HLA-DPB1/TAP1/B2M/HACD3/HLA-C/RNF183/FURIN/HLA-E/INSIG1/IMMT/QSOX1/CHCHD10/RAB4A/PEX26/TMEM11/RETREG1/HSPA9/BNIP3/TRAM1/PEX3/HLA-DQB1/FIS1/MPC1/BAK1/TAP2/YIF1A/TOMM20/ESYT2/SPCS1/SLC25A3/LAMP1/TIMM17A/ZDHHC9/VAMP5/SGMS2/TIMM17B/GALNT2/DPM2/PIGT/AMFR/RCE1/HLA-F/LBR/P2RX4/SCD/GOLGA7/FUNDC2/CLSTN1/SELENOS/TMCO1/SLC35A2/CSGALNACT1/BET1L/ARMCX3/RHBDD2/SEC62/SARAF/E…	87
CC	GO:0071005	U2-type precatalytic spliceosome	21/2433	50/19520	1.68959e-07	2.15497e-06	1.42281e-06	SNRPE/SNRPD1/SNRPD2/ZMAT2/IK/SF3A3/PRPF31/MAGOHB/SF3B5/SNRPF/SNRPD3/PRPF38A/CWC27/SF3B3/SF3B1/LSM2/SNRPB2/SNRPG/PRPF6/SNU13/LSM5	21
CC	GO:0042611	MHC protein complex	14/2433	25/19520	2.44464e-07	3.06423e-06	2.02315e-06	HLA-B/HLA-DRA/CD74/HLA-DRB1/HLA-DPA1/HLA-DPB1/HLA-DMA/B2M/HLA-C/HLA-E/HLA-DMB/HLA-DQB1/HLA-F/HLA-A	14
CC	GO:0071556	integral component of lumenal side of endoplasmic reticulum membrane	15/2433	29/19520	3.62681e-07	4.39449e-06	2.90145e-06	HLA-B/HLA-DRA/CD74/HLA-DRB1/HLA-DPA1/HLA-DPB1/HLA-C/HLA-E/HLA-DQB1/HLA-F/HLA-A/SPPL2A/BCAP31/HM13/CANX	15
CC	GO:0098553	lumenal side of endoplasmic reticulum membrane	15/2433	29/19520	3.62681e-07	4.39449e-06	2.90145e-06	HLA-B/HLA-DRA/CD74/HLA-DRB1/HLA-DPA1/HLA-DPB1/HLA-C/HLA-E/HLA-DQB1/HLA-F/HLA-A/SPPL2A/BCAP31/HM13/CANX	15
CC	GO:0070820	tertiary granule	44/2433	164/19520	4.83912e-07	5.76728e-06	3.80783e-06	CSTB/CDA/B2M/LTF/ILF2/CST3/STOM/CD55/QSOX1/PLAU/LGALS3/ITGB2/TCN1/CTSD/CEACAM1/HGSNAT/ATP11A/TIMP2/LAMP1/PRCP/NIT2/TMC6/GGH/ALDOA/ADAM8/TCIRG1/SLC11A1/TMEM63A/HBB/LYZ/GOLGA7/LAMTOR3/CYBA/CTSS/LAMTOR1/CANT1/SPTAN1/CD59/CYSTM1/RAC1/LAMTOR2/UBR4/TMEM179B/CNN2	44
CC	GO:0000315	organellar large ribosomal subunit	22/2433	57/19520	5.08122e-07	5.86357e-06	3.87141e-06	MRPL42/MRPS30/MRPL47/MRPL44/MRPL19/MRPL3/MRPL37/MRPL41/MRPL22/MRPL20/MRPL57/MRPL40/MRPL30/MRPL9/MRPL36/MRPL16/MRPS18A/MRPL51/MRPL33/MRPL52/MRPL54/MRPL12	22
CC	GO:0005762	mitochondrial large ribosomal subunit	22/2433	57/19520	5.08122e-07	5.86357e-06	3.87141e-06	MRPL42/MRPS30/MRPL47/MRPL44/MRPL19/MRPL3/MRPL37/MRPL41/MRPL22/MRPL20/MRPL57/MRPL40/MRPL30/MRPL9/MRPL36/MRPL16/MRPS18A/MRPL51/MRPL33/MRPL52/MRPL54/MRPL12	22
CC	GO:0042581	specific granule	43/2433	160/19520	6.17792e-07	7.01773e-06	4.63344e-06	B2M/LTF/LCN2/ILF2/STOM/ALDH3B1/QSOX1/PLAU/ITGB2/SLPI/TCN1/CTSD/CEACAM1/AGPAT2/HGSNAT/ATP11A/TIMP2/PDXK/NIT2/ITGAV/TMBIM1/TMC6/GGH/ADAM8/ANXA11/SCAMP1/TMEM63A/LYZ/CLCN3/LAMTOR3/CYBA/CKAP4/LAMTOR1/SLC44A2/CANT1/SPTAN1/ANXA3/TOM1/CD59/LAMTOR2/UBR4/PLAUR/CNN2	43
CC	GO:0035577	azurophil granule membrane	22/2433	58/19520	7.2269e-07	8.08301e-06	5.33679e-06	CD63/STOM/CEACAM6/SURF4/CD68/LAMP1/PRCP/LPCAT1/BST2/BRI3/NDUFC2/GLIPR1/CKAP4/B4GALT1/LAMTOR1/SNAP29/TOM1/MGST1/PSEN1/NCSTN/MAGT1/TMEM179B	22
CC	GO:0005793	endoplasmic reticulum-Golgi intermediate compartment	37/2433	130/19520	8.12431e-07	8.94906e-06	5.90859e-06	TAP1/AREG/SERPINA1/CD55/HMGB1/RAB6B/MYDGF/PROM1/P4HB/TMED3/SURF4/TAP2/YIF1A/TMED4/MGAT4B/LRPAP1/CHP1/TMED10/RAB2A/TMED2/PIEZO1/ERGIC2/TMED1/TMED9/YKT6/NUCB1/TGFA/CD59/GOLGA2/BET1/LMAN1/RER1/CSNK1D/RAB1B/BCAP31/ATP6AP1/HSPA5	37
CC	GO:0005747	mitochondrial respiratory chain complex I	20/2433	50/19520	8.51809e-07	8.97486e-06	5.92563e-06	NDUFB4/NDUFA9/NDUFS2/DMAC1/NDUFV3/NDUFB6/NDUFA4/NDUFS5/NDUFS3/NDUFS1/NDUFA2/NDUFA12/NDUFC1/NDUFS6/NDUFA3/NDUFC2/NDUFB5/NDUFS8/NDUFB10/NDUFB1	20
CC	GO:0030964	NADH dehydrogenase complex	20/2433	50/19520	8.51809e-07	8.97486e-06	5.92563e-06	NDUFB4/NDUFA9/NDUFS2/DMAC1/NDUFV3/NDUFB6/NDUFA4/NDUFS5/NDUFS3/NDUFS1/NDUFA2/NDUFA12/NDUFC1/NDUFS6/NDUFA3/NDUFC2/NDUFB5/NDUFS8/NDUFB10/NDUFB1	20
CC	GO:0045271	respiratory chain complex I	20/2433	50/19520	8.51809e-07	8.97486e-06	5.92563e-06	NDUFB4/NDUFA9/NDUFS2/DMAC1/NDUFV3/NDUFB6/NDUFA4/NDUFS5/NDUFS3/NDUFS1/NDUFA2/NDUFA12/NDUFC1/NDUFS6/NDUFA3/NDUFC2/NDUFB5/NDUFS8/NDUFB10/NDUFB1	20
CC	GO:0005838	proteasome regulatory particle	12/2433	21/19520	1.35466e-06	1.40691e-05	9.28908e-06	PSMC4/PSMD14/PSMD8/PSMD1/PSMD7/PSMD4/PSMD11/PSMC3/PSMD6/PSMD2/PSMD3/ADRM1	12
CC	GO:0005635	nuclear envelope	93/2433	462/19520	1.60659e-06	1.64506e-05	1.08614e-05	YBX1/IFI27/S100A6/GAPDH/MX1/TUBB/EIF5A/SLC16A3/PARP1/CLGN/HACD3/CDK4/CACYBP/LMNB1/RAN/BCL2/GCHFR/RAE1/PTGDS/GTPBP4/UBXN4/CSE1L/FANCL/AGPAT5/WDR3/SDCBP/TMEM38B/WTAP/BNIP3/LMO7/EPC1/RRM1/SEPHS1/SCGB1A1/MRPL19/DPY19L1/ITGB4/TMEM97/PLCB1/LPIN1/ATRAID/KPNA3/TMPO/SPAG4/THAP7/PHF11/MYOF/TMC8/TMC6/TPR/CLIC1/MYO6/IPO9/PLRG1/RETSAT/HPN/NUP62/SUMO1/MGST2/CREB3L4/EI24/BAX/ABCF1/PHF20/TMEM120A/ANXA11/CENPF/SY…	93
CC	GO:0033116	endoplasmic reticulum-Golgi intermediate compartment membrane	25/2433	75/19520	2.15399e-06	2.17493e-05	1.43599e-05	TAP1/AREG/SERPINA1/CD55/TMED3/SURF4/TAP2/YIF1A/TMED10/RAB2A/TMED2/PIEZO1/ERGIC2/TMED1/TMED9/YKT6/TGFA/CD59/GOLGA2/BET1/LMAN1/CSNK1D/RAB1B/BCAP31/ATP6AP1	25
CC	GO:0005902	microvillus	28/2433	91/19520	3.27366e-06	3.26021e-05	2.15255e-05	S100P/AQP5/ANGPT1/CA9/PROM1/RDX/SLC7A5/CEACAM1/CNP/ESPN/CLIC4/MYO1B/STARD10/ITGAV/MYO6/CA2/SYTL1/ATP6V1B2/PROM2/DCXR/MYO1E/MYO1C/ATP6V1A/EZR/HYAL2/IFT20/MSN/ATP6V1E1	28
CC	GO:0030867	rough endoplasmic reticulum membrane	13/2433	26/19520	3.63388e-06	3.57004e-05	2.35711e-05	RPS26/RPS29/SRP9/TMEM97/SEC61B/SEC61G/SEC63/RPS28/SSR4/SRPRA/SEC61A1/UBA1/PLOD2	13
CC	GO:0071007	U2-type catalytic step 2 spliceosome	14/2433	30/19520	4.33348e-06	4.20058e-05	2.77342e-05	SNRPE/SNRPD1/SNRPD2/CDC40/CDC5L/RBM22/SNRPF/SNRPD3/SYF2/CRNKL1/PLRG1/SNRPB2/PRPF19/SNRPG	14
CC	GO:0030864	cortical actin cytoskeleton	25/2433	78/19520	4.80775e-06	4.59899e-05	3.03647e-05	EEF1A1/CIB2/SLC2A1/RDX/MLPH/MISP/CALD1/CDH1/LLGL2/DBN1/SNX9/SPTBN1/GSN/SHROOM3/CAP1/MAEA/FLOT2/CTTN/SPTAN1/WASL/DSTN/KRT19/CAPN2/LASP1/AKAP13	25
CC	GO:1904724	tertiary granule lumen	20/2433	55/19520	4.90938e-06	4.63522e-05	3.06039e-05	CSTB/CDA/B2M/LTF/ILF2/CST3/QSOX1/TCN1/CTSD/TIMP2/NIT2/GGH/ALDOA/HBB/LYZ/GOLGA7/CTSS/CANT1/SPTAN1/CNN2	20
CC	GO:0030139	endocytic vesicle	66/2433	307/19520	5.52906e-06	5.15337e-05	3.4025e-05	HLA-B/HLA-DRA/CD74/HLA-DRB1/HLA-DPA1/RPS27A/HLA-DPB1/TAP1/HSP90AA1/B2M/LTF/CLTA/HLA-C/SNX3/CD9/HSPH1/CAV1/CDC42/HLA-E/KIF5B/RAB11A/SFTPB/HLA-DQB1/AP2S1/TAP2/LAMP1/UNC93B1/AMN/RAB34/ITGAV/AP2M1/SCARB2/MYO6/ATG5/ADAM8/TCIRG1/PICALM/CLTC/GSN/ANXA11/HLA-F/SLC11A1/HBB/FZD5/SCGB3A2/CLTB/MYO1E/CLCN3/MYO1C/HYOU1/FLOT2/ATG12/CYBA/CTSS/ANXA3/WASL/HYAL2/RAB13/HLA-A/ARF6/RAB9A/GNLY/RAB5A/AP2A1/CD2AP/SAA1	66
CC	GO:0030667	secretory granule membrane	65/2433	305/19520	8.75627e-06	8.05798e-05	5.32026e-05	HLA-B/KIF1A/HLA-C/SRI/CD9/APLP2/CD63/CAV2/CAV1/STOM/CD55/ALDH3B1/PLAU/CEACAM6/LGALS3/ITGB2/SURF4/CEACAM1/CD68/RHOF/AGPAT2/HGSNAT/ATP11A/TMEM184A/RAB18/LAMP1/PRCP/ITGAV/TMBIM1/TMC6/LPCAT1/TMED10/BST2/ADAM8/TCIRG1/TMED2/PAM/BRI3/SLC11A1/SCAMP1/TMEM63A/NDUFC2/GLIPR1/LAMTOR3/CYBA/CKAP4/B4GALT1/LAMTOR1/SLC44A2/SNAP29/TOM1/CD59/MGST1/PSEN1/NCSTN/MAGT1/CYSTM1/RAC1/LAMTOR2/BSG/UBR4/ICA1/TMEM179B/CD46/PLA…	65
CC	GO:1990204	oxidoreductase complex	31/2433	111/19520	9.40377e-06	8.54568e-05	5.64226e-05	UQCRH/NDUFB4/NDUFA9/NDUFS2/DMAC1/P4HB/NDUFV3/SDHB/NDUFB6/RRM1/NDUFA4/NDUFS5/UQCRC2/NDUFS3/BCS1L/UQCRFS1/NDUFS1/PDK1/NDUFA2/NDUFA12/PDHX/NDUFC1/NDUFS6/CYC1/NDUFA3/NDUFC2/CYBA/NDUFB5/NDUFS8/NDUFB10/NDUFB1	31
CC	GO:0030658	transport vesicle membrane	48/2433	206/19520	1.12683e-05	0.000101136	6.6775e-05	HLA-B/HLA-DRA/CD74/HLA-DRB1/HLA-DPA1/HLA-DPB1/AREG/B2M/CLTA/SYNGR2/HLA-C/CPE/HLA-E/MCTP1/RAB4A/SYT8/HLA-DQB1/CEACAM1/DTNBP1/TMEM184A/CALM3/LAMP1/PEF1/TMED10/SEC24D/SEC16A/TMED2/CLTC/PAM/HLA-F/SCAMP1/SEC31A/CLTB/SEC23A/TGFA/HLA-A/CD59/AP1S1/LMAN1/SYPL1/PDCD6/VTI1B/USO1/RAB5A/STX10/ICA1/SEC13/AP2A1	48
CC	GO:0031970	organelle envelope lumen	27/2433	93/19520	1.6089e-05	0.000142643	9.41795e-05	TUBB/AK2/CACYBP/CHCHD5/IMMT/CHCHD10/STOML2/RNASET2/NDUFS5/TRAP1/SHMT2/TIMM10/COA6/CHCHD2/CHCHD7/NDUFS1/ARL2BP/SOD1/STMP1/REXO2/PNPT1/TXNIP/PTGES/TIMM8B/CAPN2/GFER/GOLPH3	27
CC	GO:0005751	mitochondrial respiratory chain complex IV	8/2433	12/19520	1.78918e-05	0.000156715	0.000103471	C15orf48/NDUFA4L2/COX5A/NDUFA4/UQCRC2/UQCRFS1/COX7C/COX6A1	8
CC	GO:0045277	respiratory chain complex IV	11/2433	22/19520	2.07837e-05	0.000179878	0.000118764	C15orf48/COX6B1/NDUFA4L2/COX5A/NDUFA4/UQCRC2/COA6/UQCRFS1/COX7B/COX7C/COX6A1	11
CC	GO:0005938	cell cortex	63/2433	301/19520	2.1554e-05	0.00018435	0.000121717	EEF1A1/FGB/ASPH/FGA/CLTA/RHOB/LAMC2/CAV1/CIB2/ENO1/SLC2A1/RDX/MLPH/MARCKS/RHOD/MISP/RHOF/FNBP1L/NCL/CALD1/CDH1/FLNB/LLGL2/MYO6/RND3/DBN1/SNX9/AKAP12/SPTBN1/GSN/SHROOM3/CAP1/MAEA/ADD3/FLNA/CLTB/DST/MYL12B/CTNND1/FLOT2/MKLN1/RHOC/AGTRAP/MELK/EZR/CTTN/SPTAN1/WASL/TRIP10/PSEN1/DSTN/PXN/RAI14/RAC1/HIP1R/ARF6/KRT19/CAPN2/RAC3/LASP1/CTNNB1/AKAP13/NRBP1	63
CC	GO:0043202	lysosomal lumen	27/2433	96/19520	3.01557e-05	0.000254921	0.000168311	CD74/HSP90AA1/CTSL/CTSB/NPC2/SDC1/GYG1/CTSD/RNASET2/ARSA/HSPA8/HYAL1/EPDR1/GNS/GBA/TPP1/SCARB2/AGRN/CTSV/GLA/CHID1/FUCA1/LGMN/SDC4/CTSS/CTSA/GLB1	27
CC	GO:0005770	late endosome	58/2433	275/19520	3.56749e-05	0.000298111	0.000196827	HLA-DRA/CXCR4/CD74/HLA-DRB1/HLA-DMA/CTSL/IFITM3/RHOB/ANXA6/CD63/VPS4B/RAB11A/MFSD12/HLA-DMB/SFTPB/VPS28/SQSTM1/CD68/TSPAN15/TMEM165/SMIM22/ANXA2/HSPA8/LAMP1/DDIT3/VPS29/SCARB2/VAMP5/BST2/NAPSA/VTA1/CCZ1/LAPTM4B/TCIRG1/DYNC1LI2/CHID1/SLC11A1/LGMN/CLCN3/ARF1/MAPK3/LAMTOR3/LAMTOR4/YIPF2/CTSS/LAMTOR1/UBXN6/STARD3NL/TMEM106B/NEDD4L/CHMP1B/GRN/TPT1/LAMTOR2/VTI1B/CHMP4C/RAB9A/SPPL2A	58
CC	GO:0005911	cell-cell junction	91/2433	485/19520	3.76687e-05	0.000311195	0.000205465	S100A11/AQP3/CNN3/DDX58/CDK4/MXRA8/CDC42/SLC2A1/SDCBP/RDX/TGFBR1/ARHGEF2/STEAP1/VEGFA/CGN/CEACAM1/PIK3R1/ACTR3/ADAM15/KAZN/PDLIM1/CDH1/PDLIM4/ANXA2/GJB3/CLIC4/STARD10/YBX3/PPP1CA/VAMP5/CRB3/HPN/FGFRL1/DAG1/ABI2/DBN1/BAIAP2/EVPL/CDC42BPB/PKP3/CLDN1/TRIM29/CLDN23/TJP1/AKT1/DSG2/CLDN12/AHNAK/EPHA2/SHROOM3/FAT1/PVR/FZD5/ADD3/ATP2A2/FLNA/KRT8/CLDN7/MYO1E/CLDN4/CXADR/PIP5K1C/USP53/NCK1/ANXA1/CTNND1/FLO…	91
CC	GO:0000974	Prp19 complex	8/2433	13/19520	4.14115e-05	0.000338271	0.000223343	CDC5L/RBM22/SYF2/HSPA8/CRNKL1/ISY1/PLRG1/PRPF19	8
CC	GO:0016363	nuclear matrix	29/2433	109/19520	4.83558e-05	0.000390607	0.000257897	BASP1/LMNB1/MYB/SRRM1/HAT1/ZNF326/PRPF40A/HNRNPM/PML/SFPQ/SMC3/RUVBL2/PHB2/RUVBL1/TP53/SRPK1/CLIC4/CENPW/PPIG/HNRNPU/KIN/CEBPB/CENPF/HNRNPA2B1/MAEA/KRT8/RAD21/NCOR2/LMNA	29
CC	GO:0005758	mitochondrial intermembrane space	24/2433	83/19520	5.01341e-05	0.000400522	0.000264444	AK2/CHCHD5/IMMT/CHCHD10/STOML2/RNASET2/NDUFS5/TRAP1/SHMT2/TIMM10/COA6/CHCHD2/CHCHD7/NDUFS1/ARL2BP/SOD1/STMP1/REXO2/PNPT1/TXNIP/TIMM8B/CAPN2/GFER/GOLPH3	24
CC	GO:0070069	cytochrome complex	14/2433	36/19520	5.45674e-05	0.000431201	0.0002847	UQCRH/C15orf48/COX6B1/NDUFA4L2/COX5A/NDUFA4/UQCRC2/COA6/BCS1L/UQCRFS1/COX7B/CYC1/COX7C/COX6A1	14
CC	GO:0031941	filamentous actin	13/2433	32/19520	5.8732e-05	0.00045912	0.000303133	DPYSL3/SPECC1/PDLIM1/PDLIM4/ESPN/MYO6/EHBP1L1/MYO1C/PDLIM5/PDLIM7/NCKAP1/RAC3/CD2AP	13
CC	GO:0005819	spindle	74/2433	381/19520	6.22149e-05	0.000481173	0.000317693	NPM1/HSPB1/MAD2L2/TFDP2/CLTA/SNCG/DCTN3/IK/CBX1/RAE1/CDC42/CCDC57/DYNLT1/LSM14A/VPS4B/RAB11A/CKAP2/ARHGEF2/HAUS6/KIFAP3/NUDC/IQCB1/HEPACAM2/KATNA1/BOD1/SMC3/MISP/HAUS1/CALM2/SLC25A5/FBXO5/CALM3/ARL3/CDC25B/TTK/TOPORS/JTB/ARL2BP/TPR/HNRNPU/NUP62/HDAC3/PPP2CA/PRPF19/KIF2A/CLTC/AKT1/MZT1/PPP2CB/ANXA11/AURKA/PTP4A1/CENPF/MAEA/RIF1/KIF2C/RAD21/CDK1/CCNB1/SKA2/XIAP/CTTN/CDC20/SBDS/TPX2/GOLGA2/NUSAP1/MT…	74
CC	GO:0016282	eukaryotic 43S preinitiation complex	9/2433	17/19520	6.7779e-05	0.000513287	0.000338896	EIF3E/EIF3M/EIF3K/EIF3D/EIF3I/EIF3L/EIF3F/EIF1/EIF3B	9
CC	GO:0005788	endoplasmic reticulum lumen	62/2433	306/19520	6.82937e-05	0.000513287	0.000338896	SPP1/FGG/TIMP1/FGA/IGFBP3/ERO1A/B2M/MSLN/MXRA8/SERPINA1/CST3/APLP2/IGFBP4/CES1/MYDGF/COL19A1/P4HB/QSOX1/COL6A1/C3/GOLM1/CALU/COL9A3/FSTL3/ESD/ERP29/RNASET2/TSPAN15/PRSS23/LGALS1/ARSA/SUMF1/LRPAP1/EDN1/P3H2/P4HA1/RCN3/DAG1/VWA1/LAMC1/CRTAP/CLU/ARSD/SUMF2/ERLEC1/PDIA4/HYOU1/PLOD3/CKAP4/PNPLA2/SHISA5/NUCB1/COL1A1/APOL1/GANAB/DNAJC3/TGOLN2/PPIB/CANX/TXNDC12/HSPA5/PLAUR	62
CC	GO:0046540	U4/U6 x U5 tri-snRNP complex	15/2433	41/19520	6.84853e-05	0.000513287	0.000338896	SNRPE/SNRPD1/SNRPD2/ZMAT2/PRPF31/PPIH/SNRPF/SNRPD3/LSM2/PRPF18/USP39/SNRPG/PRPF6/SNU13/LSM5	15
CC	GO:0034399	nuclear periphery	32/2433	128/19520	7.57369e-05	0.000560609	0.000370141	BASP1/LMNB1/MYB/SRRM1/PCNA/HAT1/ZNF326/PRPF40A/HNRNPM/PML/SFPQ/SMC3/RUVBL2/PHB2/RUVBL1/TP53/SRPK1/CLIC4/CENPW/TPR/PPIG/HNRNPU/DAG1/KIN/CEBPB/CENPF/HNRNPA2B1/MAEA/KRT8/RAD21/NCOR2/LMNA	32
CC	GO:0098687	chromosomal region	68/2433	345/19520	7.63415e-05	0.000560609	0.000370141	PARP1/XRCC5/SSB/DCTN3/CBX1/PCNA/HAT1/PPP1CC/MSH2/ERCC1/PPP2R1A/PTGES3/MEAF6/PML/BUB3/SMC4/BOD1/DPY30/SMC3/MCM6/CSNK1A1/ORC4/KDM1A/ORC3/RAD51AP1/MCM7/SP100/APEX1/PPP1R12A/TTK/MCM3/MCM2/MCM5/CENPW/EZH2/TPR/PPP1CA/PHF6/PPP1CB/HNRNPU/SUV39H2/MIS18BP1/PPP2CA/DYNC1LI2/PPP2CB/FEN1/SUGT1/CEBPB/CENPF/HNRNPA2B1/DHX36/RIF1/KIF2C/RAD21/CDC73/CDK1/CCNB1/SKA2/NABP2/NUF2/PSEN1/CENPX/ANAPC16/TOP2A/CLIP1/THOC6/SE…	68
CC	GO:0090734	site of DNA damage	25/2433	91/19520	8.91504e-05	0.000641706	0.000423685	PARP1/MAD2L2/XRCC5/PARP9/CBX1/NKX3-1/SAMHD1/ARPC5/CGAS/ACTR3/TP53/VCP/UFL1/RNF168/ELOA/PRPF19/INIP/ARPC2/RIF1/PAXX/NABP2/SIRT7/ARPC1A/LMNA/SMC5	25
CC	GO:0097525	spliceosomal snRNP complex	25/2433	91/19520	8.91504e-05	0.000641706	0.000423685	SNRPE/SNRPD1/SNRPD2/ZMAT2/SF3A3/PRPF40A/PRPF31/SF3B5/PPIH/HTATSF1/SNRPF/SNRPD3/SNRPA/SF3B3/SF3B1/LSM2/SNRPB2/PRPF18/USP39/SNRPG/SNRPC/SNRNP70/PRPF6/SNU13/LSM5	25
CC	GO:0001726	ruffle	40/2433	175/19520	9.17776e-05	0.000647926	0.000427792	S100A11/EEF1A1/S100A6/TESC/DDX58/ABCA7/ARHGEF2/CIB1/PLEKHO1/ITGAV/PTK6/MYO6/NME1/SNX9/BAIAP2/KLHL2/GSN/PLEKHA1/ATP6V1B2/EPHA2/ARHGAP45/TPM1/ARF4/PIP5K1C/CLCN3/MYO1C/MKLN1/LIMA1/EPS8L2/SH3YL1/EZR/PDLIM7/CTTN/NCKAP1/RAC1/HIP1R/ARF6/RAB5A/CLIP1/CD2AP	40
CC	GO:0005686	U2 snRNP	11/2433	25/19520	9.1797e-05	0.000647926	0.000427792	SNRPE/SNRPD1/SNRPD2/SF3A3/SF3B5/HTATSF1/SNRPD3/SF3B3/SF3B1/SNRPB2/SNRPG	11
CC	GO:0097526	spliceosomal tri-snRNP complex	15/2433	42/19520	9.43352e-05	0.000659439	0.000435393	SNRPE/SNRPD1/SNRPD2/ZMAT2/PRPF31/PPIH/SNRPF/SNRPD3/LSM2/PRPF18/USP39/SNRPG/PRPF6/SNU13/LSM5	15
CC	GO:0005832	chaperonin-containing T-complex	7/2433	11/19520	9.66948e-05	0.000669496	0.000442033	TCP1/CCT2/CCT4/CCT3/CCT7/CCT5/CCT8	7
CC	GO:0045121	membrane raft	64/2433	323/19520	0.000104316	0.000708761	0.000467957	S100A10/TUBA1A/TUBA1B/TUBB/TFPI/PLSCR1/CAVIN3/CAV2/ANGPT1/CAV1/STOM/CD55/FURIN/SLC2A1/LY6K/SDCBP/HCK/STOML2/TEX101/TGFBR1/CD24/ITGB2/ATP1B3/CTSD/VDAC1/SLC25A5/GNAI3/MAL2/CDH1/ANXA2/MYOF/TPP1/IRS1/BST2/DAG1/PPP2CA/MALL/AHNAK/TGFBR2/PROM2/CXADR/MYO1C/FLOT2/EEF2/PPP2R1B/MAPK3/LAMTOR3/ATP2B1/LAMTOR4/SDC4/LAMTOR1/EZR/TRADD/ARID3A/HYAL2/ICAM1/PSEN1/EFHD2/LAMTOR2/CAPN2/BSG/ATP1B1/RAB5A/TNFRSF1A	64
CC	GO:0098857	membrane microdomain	64/2433	323/19520	0.000104316	0.000708761	0.000467957	S100A10/TUBA1A/TUBA1B/TUBB/TFPI/PLSCR1/CAVIN3/CAV2/ANGPT1/CAV1/STOM/CD55/FURIN/SLC2A1/LY6K/SDCBP/HCK/STOML2/TEX101/TGFBR1/CD24/ITGB2/ATP1B3/CTSD/VDAC1/SLC25A5/GNAI3/MAL2/CDH1/ANXA2/MYOF/TPP1/IRS1/BST2/DAG1/PPP2CA/MALL/AHNAK/TGFBR2/PROM2/CXADR/MYO1C/FLOT2/EEF2/PPP2R1B/MAPK3/LAMTOR3/ATP2B1/LAMTOR4/SDC4/LAMTOR1/EZR/TRADD/ARID3A/HYAL2/ICAM1/PSEN1/EFHD2/LAMTOR2/CAPN2/BSG/ATP1B1/RAB5A/TNFRSF1A	64
CC	GO:0043034	costamere	9/2433	18/19520	0.00012056	0.000804101	0.000530905	PLEC/SVIL/AHNAK2/FXR1/DAG1/AHNAK/KRT8/SDC4/KRT19	9
CC	GO:0070993	translation preinitiation complex	9/2433	18/19520	0.00012056	0.000804101	0.000530905	EIF3E/EIF3M/EIF3K/EIF3D/EIF3I/EIF3L/EIF3F/EIF1/EIF3B	9
CC	GO:0045334	clathrin-coated endocytic vesicle	18/2433	57/19520	0.000123776	0.000818047	0.000540113	HLA-DRA/CD74/HLA-DRB1/HLA-DPA1/HLA-DPB1/CLTA/CD9/SFTPB/HLA-DQB1/AP2S1/AP2M1/MYO6/PICALM/CLTC/FZD5/CLTB/MYO1E/AP2A1	18
CC	GO:0030863	cortical cytoskeleton	27/2433	104/19520	0.000136045	0.000891033	0.000588303	EEF1A1/CIB2/SLC2A1/RDX/MLPH/MISP/CALD1/CDH1/LLGL2/DBN1/SNX9/SPTBN1/GSN/SHROOM3/CAP1/MAEA/FLNA/FLOT2/EZR/CTTN/SPTAN1/WASL/DSTN/KRT19/CAPN2/LASP1/AKAP13	27
CC	GO:0032040	small-subunit processome	14/2433	39/19520	0.000150784	0.000978748	0.000646216	FBL/XRCC5/NOP58/IMP4/RPS7/WDR3/MPHOSPH10/UTP11/UTP4/NOP56/DCAF13/NOL10/KRR1/SNU13	14
CC	GO:0033290	eukaryotic 48S preinitiation complex	8/2433	15/19520	0.000164189	0.00105633	0.000697441	EIF3E/EIF3M/EIF3K/EIF3D/EIF3I/EIF3L/EIF3F/EIF3B	8
CC	GO:0001650	fibrillar center	33/2433	139/19520	0.00017154	0.0010909	0.000720265	FBL/RERG/NOP58/NFIB/NOP53/IMP4/RAE1/SMARCB1/UBE2N/EEF1D/FBLIM1/POLR1E/DKC1/SPECC1/UTP4/NOP56/WDR43/CDCA7L/PLRG1/EXOSC8/SNRPB2/DDX46/RPAIN/FAM111A/NOLC1/TXNRD1/EZR/TAX1BP3/RAI14/USO1/SMUG1/TRAF4/CD2AP	33
CC	GO:0098858	actin-based cell projection	46/2433	216/19520	0.000172563	0.0010909	0.000720265	S100P/AQP5/ANGPT1/CA9/CDC42/CIB2/PROM1/RDX/SLC7A5/ITGA3/CIB1/CEACAM1/CNP/FXR1/ESPN/CLIC4/MYO1B/STARD10/ITGAV/MYO6/CA2/DAG1/ABI2/MAP2/BAIAP2/SYTL1/ATP6V1B2/PROM2/SYNE2/DCXR/UBE2Q1/MYO1E/ABI1/CXADR/MYO1C/RHOC/EPS8L2/B4GALT1/ATP6V1A/EZR/HYAL2/IFT20/ARF6/MSN/ATP6V1E1/AP2A1	46
CC	GO:0035861	site of double-strand break	20/2433	69/19520	0.000199466	0.0012501	0.000825377	PARP1/MAD2L2/SAMHD1/ARPC5/CGAS/ACTR3/TP53/VCP/UFL1/RNF168/PRPF19/INIP/ARPC2/RIF1/PAXX/NABP2/SIRT7/ARPC1A/LMNA/SMC5	20
CC	GO:0031261	DNA replication preinitiation complex	7/2433	12/19520	0.000207019	0.00127043	0.000838797	MCM6/GINS2/ORC3/MCM7/MCM3/MCM2/MCM5	7
CC	GO:0034709	methylosome	7/2433	12/19520	0.000207019	0.00127043	0.000838797	SNRPE/SNRPD1/SNRPD2/SNRPF/SNRPD3/PRMT1/SNRPG	7
CC	GO:0030532	small nuclear ribonucleoprotein complex	26/2433	101/19520	0.000207952	0.00127043	0.000838797	SNRPE/SNRPD1/SNRPD2/ZMAT2/SF3A3/PRPF40A/PRPF31/SF3B5/PPIH/HTATSF1/SNRPF/SNRPD3/SLU7/SNRPA/SF3B3/SF3B1/LSM2/SNRPB2/PRPF18/USP39/SNRPG/SNRPC/SNRNP70/PRPF6/SNU13/LSM5	26
CC	GO:0035579	specific granule membrane	24/2433	91/19520	0.000241989	0.00146605	0.000967958	STOM/ALDH3B1/PLAU/ITGB2/CEACAM1/AGPAT2/HGSNAT/ATP11A/ITGAV/TMBIM1/TMC6/ADAM8/SCAMP1/TMEM63A/LAMTOR3/CYBA/CKAP4/LAMTOR1/SLC44A2/TOM1/CD59/LAMTOR2/UBR4/PLAUR	24
CC	GO:0030120	vesicle coat	17/2433	55/19520	0.000253038	0.00151386	0.000999526	CLTA/TMED3/AP2S1/AP2M1/PEF1/SEC24D/PICALM/CLTC/SEC31A/CLTB/SEC23A/COPB2/AP1S1/PDCD6/COPZ1/SEC13/AP2A1	17
CC	GO:0045335	phagocytic vesicle	32/2433	136/19520	0.000254046	0.00151386	0.000999526	HLA-B/TAP1/B2M/LTF/HLA-C/SNX3/CDC42/HLA-E/KIF5B/RAB11A/TAP2/LAMP1/UNC93B1/RAB34/ITGAV/ATG5/ADAM8/TCIRG1/GSN/ANXA11/HLA-F/SLC11A1/CLCN3/MYO1C/ATG12/CYBA/CTSS/ANXA3/HLA-A/RAB9A/GNLY/RAB5A	32
CC	GO:0042613	MHC class II protein complex	8/2433	16/19520	0.000292508	0.00172889	0.00114149	HLA-DRA/CD74/HLA-DRB1/HLA-DPA1/HLA-DPB1/HLA-DMA/HLA-DMB/HLA-DQB1	8
CC	GO:0000314	organellar small ribosomal subunit	11/2433	28/19520	0.000309513	0.00178584	0.0011791	MRPL42/MRPS35/MRPS22/MRPS9/DAP3/MRPS26/MRPS10/MRPS18A/MRPS28/MRPS33/MRPS7	11
CC	GO:0005763	mitochondrial small ribosomal subunit	11/2433	28/19520	0.000309513	0.00178584	0.0011791	MRPL42/MRPS35/MRPS22/MRPS9/DAP3/MRPS26/MRPS10/MRPS18A/MRPS28/MRPS33/MRPS7	11
CC	GO:0101031	chaperone complex	11/2433	28/19520	0.000309513	0.00178584	0.0011791	HSP90AB1/TCP1/CCT2/CCT4/CCT3/CCT7/CCT5/PTGES3/HSPA8/CCT8/SDF2	11
CC	GO:0005839	proteasome core complex	9/2433	20/19520	0.000329597	0.00188675	0.00124572	PSMB9/PSMB1/PSMB8/PSMA4/PSMA7/PSMA5/PSMB2/PSMA3/PSMA1	9
CC	GO:0030136	clathrin-coated vesicle	41/2433	192/19520	0.000355995	0.00202194	0.00133498	HLA-DRA/CD74/HLA-DRB1/HLA-DPA1/HLA-DPB1/AREG/CLTA/SNX3/CD9/FURIN/SFTPB/HLA-DQB1/AP2S1/HSPA8/EDN1/REEP6/AP2M1/TMED10/SCARB2/MYO6/SNX9/MALL/PICALM/CLTC/EREG/SPG21/SCAMP1/GPR107/FZD5/CLTB/MYO1E/TMED9/DVL1/TGFA/RAB13/AP1S1/HIP1R/TGOLN2/RAB5A/BCAP31/AP2A1	41
CC	GO:0005687	U4 snRNP	7/2433	13/19520	0.000400228	0.0022382	0.00147776	SNRPE/SNRPD1/SNRPD2/PRPF31/SNRPF/SNRPD3/SNRPG	7
CC	GO:0008250	oligosaccharyltransferase complex	7/2433	13/19520	0.000400228	0.0022382	0.00147776	OST4/OSTC/KRTCAP2/STT3A/DAD1/MAGT1/RPN1	7
CC	GO:0030686	90S preribosome	11/2433	29/19520	0.000442861	0.00245771	0.0016227	IMP4/WDR12/WDR3/NOC2L/MPHOSPH10/SRFBP1/UTP4/BMS1/RSL1D1/FAM207A/RRP7A	11
CC	GO:0072562	blood microparticle	33/2433	146/19520	0.000448288	0.00246185	0.00162543	FGB/FGG/FGA/ANGPTL4/SERPING1/STOM/CIB2/C8G/SLC2A1/EIF2A/SDCBP/C3/HSPA1A/INTS11/PROS1/CFH/YWHAZ/HSPA8/CLIC1/DNPEP/CLU/GSN/HSPA6/IGHG4/HBB/C1R/IGKC/ZBTB38/APOL1/IGHA1/C1S/MSN/IGLC2	33
CC	GO:0000228	nuclear chromosome	50/2433	250/19520	0.000450379	0.00246185	0.00162543	HDAC2/SYCP2/SMC2/IK/PCNA/NIFK/SMARCB1/TFPT/SINHCAF/CDC5L/JUN/MORF4L1/HDAC1/KIFAP3/RAD1/MMS22L/PRIM1/SMC3/ACTR6/MCM6/RUVBL2/RUVBL1/GINS2/ORC4/ORC3/MCM7/ACTL6A/CCNB1IP1/POLE4/MCM3/MCM2/MCM5/POLD4/POLE3/EXOSC9/CPSF6/RBBP4/PLRG1/HNRNPU/ZNHIT1/MIS18BP1/PRPF19/CSNK2A1/ADD3/SWI5/RAD21/CCNB1/NUF2/SIRT7/TOP2A	50
CC	GO:0005852	eukaryotic translation initiation factor 3 complex	8/2433	17/19520	0.000492267	0.00267073	0.00176335	EIF3E/EIF3M/EIF3K/EIF3D/EIF3I/EIF3L/EIF3F/EIF3B	8
CC	GO:0071162	CMG complex	6/2433	10/19520	0.000499795	0.00269149	0.00177705	MCM6/GINS2/MCM7/MCM3/MCM2/MCM5	6
CC	GO:0005884	actin filament	27/2433	113/19520	0.000576485	0.00305916	0.0020198	TPM2/DPYSL3/PLS3/HCK/MISP/SPECC1/PDLIM1/PDLIM4/ESPN/MYO1B/MYO6/DBN1/TPM1/FLNA/EHBP1L1/ANXA1/MYO1C/PDLIM5/EZR/PDLIM7/CTTN/TPM4/NCKAP1/WASL/RAC1/RAC3/CD2AP	27
CC	GO:0120114	Sm-like protein family complex	27/2433	113/19520	0.000576485	0.00305916	0.0020198	SNRPE/SNRPD1/SNRPD2/ZMAT2/SF3A3/PRPF40A/PRPF31/STRAP/SF3B5/PPIH/HTATSF1/SNRPF/SNRPD3/SLU7/SNRPA/SF3B3/SF3B1/LSM2/SNRPB2/PRPF18/USP39/SNRPG/SNRPC/SNRNP70/PRPF6/SNU13/LSM5	27
CC	GO:0030669	clathrin-coated endocytic vesicle membrane	13/2433	39/19520	0.000591762	0.00311747	0.0020583	HLA-DRA/CD74/HLA-DRB1/HLA-DPA1/HLA-DPB1/CD9/HLA-DQB1/AP2S1/AP2M1/PICALM/CLTC/FZD5/AP2A1	13
CC	GO:0005732	sno(s)RNA-containing ribonucleoprotein complex	11/2433	30/19520	0.0006211	0.00324849	0.00214481	FBL/NOP58/RPP40/SNRPF/MPHOSPH10/DKC1/NOP56/RPP30/NOLC1/NOP10/SNU13	11
CC	GO:0000781	chromosome, telomeric region	35/2433	161/19520	0.000658599	0.00342001	0.00225805	PARP1/XRCC5/SSB/CBX1/PCNA/HAT1/PPP1CC/MSH2/ERCC1/PTGES3/PML/DPY30/MCM6/ORC4/KDM1A/ORC3/RAD51AP1/MCM7/SP100/APEX1/MCM3/MCM2/MCM5/EZH2/PPP1CA/PPP1CB/FEN1/HNRNPA2B1/DHX36/RIF1/CDC73/CDK1/NABP2/THOC6/SMC5	35
CC	GO:0031252	cell leading edge	74/2433	411/19520	0.000673934	0.00347482	0.00229424	S100A11/EEF1A1/S100A6/CXCR4/TESC/DDX58/DPYSL3/CDC42/ABCA7/DYNLT1/P4HB/CAPRIN1/RDX/SNX2/ARPC5/ARHGEF2/CIB1/ACTR3/ITGB4/PLEKHO1/CDH1/PDLIM4/LMO4/ITGAV/PTK6/MYO6/NME1/DAG1/ABI2/DBN1/SNX9/BAIAP2/CDC42BPB/AKT1/SPTBN1/KLHL2/ARPC2/GSN/PLEKHA1/ATP6V1B2/EPHA2/ARHGAP45/PIEZO1/TPM1/SYNE2/DST/ARF4/ABI1/PIP5K1C/CLCN3/CTNND1/MYO1C/ARF1/FLOT2/MKLN1/LIMA1/ATP2B1/EPS8L2/SH3YL1/EZR/PDLIM7/CTTN/NCKAP1/WASL/RAB13/PX…	74
CC	GO:0031528	microvillus membrane	10/2433	26/19520	0.000707457	0.00362198	0.0023914	S100P/CA9/PROM1/SLC7A5/CEACAM1/ITGAV/SYTL1/PROM2/EZR/MSN	10
CC	GO:0005744	TIM23 mitochondrial import inner membrane translocase complex	7/2433	14/19520	0.000714419	0.00363205	0.00239805	SLC25A6/TIMM10/TIMM17A/DNAJC15/TIMM17B/TIMM50/ROMO1	7
CC	GO:0033178	proton-transporting two-sector ATPase complex, catalytic domain	8/2433	18/19520	0.000789633	0.00398655	0.00263211	ATP5F1C/ATP5F1B/ATP5F1A/ATP6V1F/ATP6V1B2/ATP6V1A/ATP6V1E1/ATP6AP1	8
CC	GO:0031965	nuclear membrane	56/2433	295/19520	0.000816462	0.00409357	0.00270277	YBX1/IFI27/GAPDH/MX1/SLC16A3/HACD3/CDK4/LMNB1/BCL2/GCHFR/PTGDS/GTPBP4/WDR3/SDCBP/TMEM38B/WTAP/EPC1/SEPHS1/MRPL19/DPY19L1/ITGB4/TMEM97/PLCB1/LPIN1/SPAG4/THAP7/PHF11/MYOF/TMC8/TMC6/TPR/CLIC1/MYO6/PLRG1/RETSAT/HPN/NUP62/SUMO1/CREB3L4/EI24/PHF20/TMEM120A/SYNE2/LBR/TRA2B/RIF1/P2RX4/GNAQ/SHISA5/PSEN1/KLHDC2/TM7SF2/MFSD10/LMNA/CCND1/UNC50	56
CC	GO:0030666	endocytic vesicle membrane	35/2433	163/19520	0.000832935	0.00414756	0.00273842	HLA-B/HLA-DRA/CD74/HLA-DRB1/HLA-DPA1/RPS27A/HLA-DPB1/TAP1/B2M/HLA-C/CD9/CAV1/HLA-E/HLA-DQB1/AP2S1/TAP2/LAMP1/RAB34/AP2M1/SCARB2/ATG5/TCIRG1/PICALM/CLTC/HLA-F/SLC11A1/FZD5/ATG12/CYBA/ANXA3/WASL/HLA-A/RAB9A/RAB5A/AP2A1	35
CC	GO:0005876	spindle microtubule	19/2433	71/19520	0.000853766	0.00422237	0.00278781	CCDC57/RAB11A/HAUS6/KIFAP3/BOD1/MISP/HAUS1/CALM2/CALM3/ARL3/HNRNPU/KIF2A/CLTC/AURKA/CDK1/SKA2/XIAP/RMDN1/CSNK1D	19
CC	GO:0031902	late endosome membrane	31/2433	140/19520	0.0009443	0.00463855	0.00306259	HLA-DRA/HLA-DRB1/HLA-DMA/IFITM3/RHOB/ANXA6/CD63/VPS4B/HLA-DMB/VPS28/CD68/TSPAN15/TMEM165/ANXA2/LAMP1/SCARB2/LAPTM4B/SLC11A1/CLCN3/LAMTOR3/LAMTOR4/YIPF2/LAMTOR1/UBXN6/STARD3NL/TMEM106B/CHMP1B/LAMTOR2/VTI1B/CHMP4C/SPPL2A	31
CC	GO:0008287	protein serine/threonine phosphatase complex	15/2433	51/19520	0.00102489	0.00496732	0.00327966	PPP1CC/PPP2R1A/PPP1R12A/PPP1CA/PPP1CB/PPP1R15A/PPP2CA/PPP2CB/IER5/NCK1/PPP4R1/PPP4R3B/PPP2R1B/PPP4C/PTPA	15
CC	GO:1903293	phosphatase complex	15/2433	51/19520	0.00102489	0.00496732	0.00327966	PPP1CC/PPP2R1A/PPP1R12A/PPP1CA/PPP1CB/PPP1R15A/PPP2CA/PPP2CB/IER5/NCK1/PPP4R1/PPP4R3B/PPP2R1B/PPP4C/PTPA	15
CC	GO:0005912	adherens junction	36/2433	172/19520	0.00115308	0.00553816	0.00365656	S100A11/CNN3/SDCBP/RDX/VEGFA/CEACAM1/ADAM15/PDLIM1/CDH1/PDLIM4/ANXA2/PPP1CA/DAG1/ABI2/BAIAP2/PKP3/TRIM29/TJP1/SHROOM3/PVR/MYO1E/CXADR/PIP5K1C/ANXA1/CTNND1/FLOT2/CYTH2/NECTIN2/PDLIM5/BAIAP2L1/PDLIM7/TNKS1BP1/NDRG1/CDCA3/KRT18/CTNNB1	36
CC	GO:0030140	trans-Golgi network transport vesicle	11/2433	32/19520	0.00115791	0.00553816	0.00365656	CLTA/FURIN/TMED10/CLTC/SPG21/CLTB/TMED9/RAB13/AP1S1/TGOLN2/AP2A1	11
CC	GO:0016328	lateral plasma membrane	17/2433	62/19520	0.00116944	0.00555673	0.00366882	SLC16A3/TACSTD2/PPP2R1A/CEACAM1/CDH1/CLDN1/DSG2/CLDN12/CLDN7/CLDN4/ANXA1/MYO1C/DVL1/RAB13/ERBB3/ATP1B1/CTNNB1	17
CC	GO:0032587	ruffle membrane	23/2433	95/19520	0.0011772	0.00555732	0.00366921	EEF1A1/TESC/DDX58/ABCA7/ARHGEF2/CIB1/PLEKHO1/ITGAV/MYO6/NME1/PLEKHA1/EPHA2/ARHGAP45/TPM1/ARF4/PIP5K1C/CLCN3/MYO1C/EPS8L2/SH3YL1/EZR/RAC1/HIP1R	23
CC	GO:0005685	U1 snRNP	11/2433	33/19520	0.00154345	0.00723927	0.00477971	SNRPE/SNRPD1/SNRPD2/PRPF40A/SNRPF/SNRPD3/SNRPA/SNRPB2/SNRPG/SNRPC/SNRNP70	11
CC	GO:0036019	endolysosome	9/2433	24/19520	0.0016106	0.00750581	0.00495569	CTSL/CLTA/CTSB/AP2S1/AP2M1/CLTC/LGMN/CTSS/AP2A1	9
CC	GO:0042555	MCM complex	6/2433	12/19520	0.00176001	0.00809829	0.00534687	MMS22L/MCM6/MCM7/MCM3/MCM2/MCM5	6
CC	GO:0045120	pronucleus	6/2433	12/19520	0.00176001	0.00809829	0.00534687	CBX1/SLC2A1/EZH2/AURKA/CENPF/RIF1	6
CC	GO:0035145	exon-exon junction complex	8/2433	20/19520	0.00180648	0.00820818	0.00541943	MAGOH/MAGOHB/THRAP3/RBM8A/UPF2/PNN/SAP18/PYM1	8
CC	GO:0071682	endocytic vesicle lumen	8/2433	20/19520	0.00180648	0.00820818	0.00541943	HSP90AA1/LTF/HSPH1/HBB/SCGB3A2/HYOU1/GNLY/SAA1	8
CC	GO:0005689	U12-type spliceosomal complex	10/2433	29/19520	0.00187665	0.00847406	0.00559498	YBX1/SNRPE/SNRPD1/SNRPD2/SF3B5/SNRPF/SNRPD3/SF3B3/SF3B1/SNRPG	10
CC	GO:0030132	clathrin coat of coated pit	7/2433	16/19520	0.00189849	0.00851975	0.00562514	CLTA/AP2S1/AP2M1/PICALM/CLTC/CLTB/AP2A1	7
CC	GO:0036464	cytoplasmic ribonucleoprotein granule	45/2433	234/19520	0.00192953	0.00860595	0.00568206	YBX1/RPS6/TUBA1A/RPL28/TUBB/PSMA4/CDC42/LSM14A/STAU1/MEX3A/YTHDF2/CSDE1/CAPRIN1/SQSTM1/NCL/PNRC2/VCP/G3BP1/FXR1/MCRIP1/BARD1/CNOT7/TIA1/RBPMS/HNRNPK/POLR2G/APOBEC3G/ZFP36/NBDY/HNRNPU/LSM2/PSMC3/SNRPB2/SNRPG/UPF2/CARHSP1/PRRC2C/DHX36/CNOT2/CELF1/CKAP4/SERPINB1/PABPC4/RAC1/TSTD1	45
CC	GO:0030665	clathrin-coated vesicle membrane	26/2433	117/19520	0.00221253	0.009808	0.00647571	HLA-DRA/CD74/HLA-DRB1/HLA-DPA1/HLA-DPB1/AREG/CLTA/CD9/HLA-DQB1/AP2S1/HSPA8/REEP6/AP2M1/SCARB2/MYO6/PICALM/CLTC/EREG/FZD5/CLTB/TGFA/AP1S1/HIP1R/TGOLN2/RAB5A/AP2A1	26
CC	GO:0030057	desmosome	9/2433	25/19520	0.00224111	0.00987449	0.00651961	KAZN/EVPL/PKP3/DSG2/B4GALT1/PPL/PNN/UBA1/PERP	9
CC	GO:0035770	ribonucleoprotein granule	46/2433	244/19520	0.00260452	0.0114066	0.00753115	YBX1/RPS6/TUBA1A/RPL28/TUBB/PSMA4/CDC42/LSM14A/STAU1/MEX3A/YTHDF2/CSDE1/CAPRIN1/SQSTM1/NCL/PNRC2/VCP/G3BP1/FXR1/MCRIP1/BARD1/CNOT7/TIA1/RBPMS/HNRNPK/POLR2G/APOBEC3G/ZFP36/NBDY/HNRNPU/LSM2/PSMC3/SUMO1/SNRPB2/SNRPG/UPF2/CARHSP1/PRRC2C/DHX36/CNOT2/CELF1/CKAP4/SERPINB1/PABPC4/RAC1/TSTD1	46
CC	GO:0031093	platelet alpha granule lumen	17/2433	67/19520	0.00290785	0.0126587	0.00835788	FGB/FGG/TIMP1/FGA/SRGN/OLA1/SERPING1/CFD/SERPINA1/TMSB4X/QSOX1/VEGFA/PROS1/ALDOA/CLU/TEX264/VTI1B	17
CC	GO:0016580	Sin3 complex	6/2433	13/19520	0.00292554	0.0126599	0.00835869	HDAC2/SINHCAF/MORF4L1/HDAC1/RBBP4/CSNK2A1	6
CC	GO:0035580	specific granule lumen	16/2433	62/19520	0.00317474	0.013657	0.00901702	B2M/LTF/LCN2/ILF2/QSOX1/SLPI/TCN1/CTSD/TIMP2/PDXK/NIT2/GGH/LYZ/CANT1/SPTAN1/CNN2	16
CC	GO:0005697	telomerase holoenzyme complex	8/2433	22/19520	0.00364758	0.0155988	0.0102991	SNRPE/PTGES3/SNRPD3/DKC1/HNRNPC/NVL/HNRNPU/NOP10	8
CC	GO:0016469	proton-transporting two-sector ATPase complex	14/2433	52/19520	0.00370576	0.0157549	0.0104021	ATP5F1C/ATP5F1B/ATP5ME/ATP5PB/ATP5MC3/ATP5F1A/ATP6V1F/TCIRG1/ATP6V1G1/ATP6V1B2/ATP6V1A/ATP5MG/ATP6V1E1/ATP6AP1	14
CC	GO:0005798	Golgi-associated vesicle	21/2433	92/19520	0.00402196	0.0169998	0.0112241	CLTA/FURIN/TMED3/TMED10/KDELR2/TMED2/CLTC/SPG21/KDELR3/CLTB/COPB2/TMED9/ARF1/NUCB1/RAB13/AP1S1/ITM2B/COPZ1/TGOLN2/SPPL2A/AP2A1	21
CC	GO:0000177	cytoplasmic exosome (RNase complex)	6/2433	14/19520	0.00458388	0.0192629	0.0127183	EXOSC5/EXOSC3/EXOSC9/EXOSC8/CARHSP1/PNPT1	6
CC	GO:0005604	basement membrane	21/2433	94/19520	0.00524124	0.0218987	0.0144586	TIMP1/CD151/PTN/LAMC2/LAMB3/COL9A3/LOXL2/ITGB4/EFEMP2/ANXA2/LAMA3/LAMA5/P3H2/AGRN/DAG1/ANG/VWA1/LAMC1/DST/TGFBI/LAD1	21
CC	GO:0030670	phagocytic vesicle membrane	18/2433	77/19520	0.00570653	0.0237066	0.0156522	HLA-B/TAP1/B2M/HLA-C/HLA-E/TAP2/LAMP1/RAB34/ATG5/TCIRG1/HLA-F/SLC11A1/ATG12/CYBA/ANXA3/HLA-A/RAB9A/RAB5A	18
CC	GO:0005811	lipid droplet	21/2433	95/19520	0.00595662	0.0244978	0.0161746	RBP1/GAPDH/SYNGR2/CAV1/PLIN2/CES1/VCP/ANXA2/RAB18/LPCAT1/PRPF19/G0S2/SDR16C5/SET/CKAP4/HSD17B11/PNPLA2/HSD3B7/HILPDA/BCAP31/PLIN3	21
CC	GO:0034719	SMN-Sm protein complex	7/2433	19/19520	0.00596439	0.0244978	0.0161746	SNRPE/SNRPD1/SNRPD2/STRAP/SNRPF/SNRPD3/SNRPG	7
CC	GO:0034708	methyltransferase complex	21/2433	96/19520	0.00675024	0.0275698	0.0182029	HDAC2/SNRPE/SNRPD1/SNRPD2/PRPF31/WTAP/SNRPF/SNRPD3/PRMT1/DPY30/TRMT61B/TRMT6/RUVBL2/RUVBL1/ASH2L/EZH2/RBBP4/TAF7/SNRPG/PHF20/TAF6	21
CC	GO:0030127	COPII vesicle coat	6/2433	15/19520	0.00684256	0.0276363	0.0182468	PEF1/SEC24D/SEC31A/SEC23A/PDCD6/SEC13	6
CC	GO:0098554	cytoplasmic side of endoplasmic reticulum membrane	6/2433	15/19520	0.00684256	0.0276363	0.0182468	DNAJA1/RPS26/RPS29/RPS28/SPPL2A/HM13	6
CC	GO:0000138	Golgi trans cisterna	5/2433	11/19520	0.00722267	0.0290104	0.0191541	BET1L/B4GALT1/YIPF2/BET1/YIPF6	5
CC	GO:1904949	ATPase complex	22/2433	103/19520	0.00756268	0.0302092	0.0199455	HDAC2/SMARCB1/TFPT/SMARCA2/SMARCC1/ATP1B3/HDAC1/ACTR6/RUVBL2/RUVBL1/VCP/ATP11A/ACTL6A/HMGXB4/POLE3/SMARCA4/RBBP4/ZNHIT1/RFC4/RFC1/CSNK2A1/ATP1B1	22
CC	GO:0045178	basal part of cell	46/2433	258/19520	0.00761371	0.0302468	0.0199704	HSP90AB1/AQP5/AQP3/SLC16A3/TACSTD2/HPGD/CA9/ST14/SLC2A1/CD81/MET/SLC7A5/ITGA3/ITGA2/CEACAM1/ITGB4/SLC29A1/ANXA2/PRCP/EDN1/CA2/CLDN1/ERBB2/TJP1/PROM2/MAP7/CLDN7/DST/CLDN4/CXADR/ANXA1/MYO1C/FLOT2/ATP2B1/B4GALT1/SLC40A1/EZR/TGFA/SLC39A8/ERBB3/BSG/MSN/ATP1B1/CTNNB1/AP2A1/SLC3A2	46
CC	GO:0031904	endosome lumen	10/2433	35/19520	0.00855358	0.0337959	0.0223137	CTSL/B2M/CTSB/CD63/SFTPB/PDLIM4/LRPAP1/NAPSA/LGMN/CTSS	10
CC	GO:0009925	basal plasma membrane	43/2433	240/19520	0.00884141	0.0347443	0.0229399	HSP90AB1/AQP5/AQP3/SLC16A3/TACSTD2/HPGD/CA9/ST14/SLC2A1/CD81/MET/SLC7A5/ITGA3/CEACAM1/ITGB4/SLC29A1/ANXA2/CA2/CLDN1/ERBB2/TJP1/PROM2/MAP7/CLDN7/DST/CLDN4/CXADR/ANXA1/MYO1C/FLOT2/ATP2B1/B4GALT1/SLC40A1/EZR/TGFA/SLC39A8/ERBB3/BSG/MSN/ATP1B1/CTNNB1/AP2A1/SLC3A2	43
CC	GO:0030014	CCR4-NOT complex	6/2433	16/19520	0.009809	0.0380853	0.0251458	CNOT7/ZFP36/CNOT2/TNKS1BP1/CNOT11/TOB1	6
CC	GO:0070822	Sin3-type complex	6/2433	16/19520	0.009809	0.0380853	0.0251458	HDAC2/SINHCAF/MORF4L1/HDAC1/RBBP4/CSNK2A1	6
CC	GO:0030660	Golgi-associated vesicle membrane	13/2433	52/19520	0.00984876	0.0380853	0.0251458	CLTA/TMED3/KDELR2/TMED2/CLTC/KDELR3/CLTB/COPB2/AP1S1/ITM2B/COPZ1/SPPL2A/AP2A1	13
CC	GO:0000775	chromosome, centromeric region	36/2433	196/19520	0.0106971	0.0410536	0.0271056	DCTN3/CBX1/PPP1CC/PPP2R1A/MEAF6/BUB3/SMC4/BOD1/SMC3/CSNK1A1/PPP1R12A/TTK/CENPW/TPR/PHF6/HNRNPU/SUV39H2/MIS18BP1/PPP2CA/DYNC1LI2/PPP2CB/SUGT1/CEBPB/CENPF/KIF2C/RAD21/CCNB1/SKA2/NUF2/PSEN1/CENPX/ANAPC16/TOP2A/CLIP1/SEC13/SMC5	36
CC	GO:0090575	RNA polymerase II transcription regulator complex	32/2433	170/19520	0.0109187	0.0410536	0.0271056	TFDP2/ASCL2/PBX1/HMGA1/JUN/SFPQ/TAF11/TBPL1/TP53/GTF2B/LMO4/TEAD2/DDIT3/CCNH/NFYC/YAP1/HNRNPU/TAF7/RXRA/GTF2H5/HIF1A/CEBPB/JUND/HNRNPAB/TLE1/HYAL2/JUNB/TAF6/RUNX1/GTF2A2/CTNNB1/SMAD2	32
CC	GO:0035267	NuA4 histone acetyltransferase complex	7/2433	21/19520	0.0110037	0.0410536	0.0271056	MORF4L1/EPC1/MEAF6/RUVBL2/RUVBL1/ACTL6A/MORF4L2	7
CC	GO:0043189	H4/H2A histone acetyltransferase complex	7/2433	21/19520	0.0110037	0.0410536	0.0271056	MORF4L1/EPC1/MEAF6/RUVBL2/RUVBL1/ACTL6A/MORF4L2	7
CC	GO:0008540	proteasome regulatory particle, base subcomplex	5/2433	12/19520	0.0111246	0.0410536	0.0271056	PSMC4/PSMD1/PSMD4/PSMC3/PSMD2	5
CC	GO:0043256	laminin complex	5/2433	12/19520	0.0111246	0.0410536	0.0271056	LAMC2/LAMB3/LAMA3/LAMA5/LAMC1	5
CC	GO:0071006	U2-type catalytic step 1 spliceosome	5/2433	12/19520	0.0111246	0.0410536	0.0271056	RBM22/MAGOHB/ISY1/PRPF19/RBM8A	5
CC	GO:0071012	catalytic step 1 spliceosome	5/2433	12/19520	0.0111246	0.0410536	0.0271056	RBM22/MAGOHB/ISY1/PRPF19/RBM8A	5
CC	GO:0071564	npBAF complex	5/2433	12/19520	0.0111246	0.0410536	0.0271056	SMARCB1/SMARCA2/SMARCC1/ACTL6A/SMARCA4	5
CC	GO:0005874	microtubule	69/2433	423/19520	0.0113747	0.0417646	0.027575	STMN1/TUBB2B/TUBA1A/TUBA1B/TUBB/TCP1/FKBP4/CCT2/TBCB/KIF1A/CCT4/CCT3/DCTN3/HSPH1/CCDC57/DYNLT1/KIF5B/CCT7/CCT5/RAB11A/CKAP2/ARHGEF2/HAUS6/KIFAP3/NUDC/SVIL/KATNA1/BOD1/MISP/HAUS1/TTLL4/CALM2/TBCC/CALM3/ARL3/CEP57L1/CCT8/HNRNPU/DYNC2LI1/MAP2/KIF2A/CLTC/TPGS2/DYNC1LI2/CEP57/AURKA/SHROOM3/CFAP20/MAP7/DCXR/DST/CDK2AP2/SELENOS/KIF2C/CDK1/SKA2/DVL1/XIAP/HOOK3/NDRG1/TPX2/GOLGA2/MTUS1/RMDN1/TPT1/CSNK1D/CL…	69
CC	GO:0030016	myofibril	40/2433	224/19520	0.011863	0.0433387	0.0286142	TPM2/SRI/RPL15/ENO1/SLC2A1/CSRP2/PLEC/SQSTM1/SVIL/AHNAK2/CALM2/FXR1/CALD1/PDLIM1/PDLIM4/CALM3/TNNC2/PYROXD1/PPP1R12A/FLNB/DAG1/ALDOA/CAPZB/FHL2/SPTBN1/AHNAK/TPM1/SYNE2/FLNA/KRT8/DST/ARF1/SDC4/PDLIM5/PDLIM7/SYNC/TPM4/PSEN1/LMAN1/KRT19	40
CC	GO:0043292	contractile fiber	41/2433	231/19520	0.012107	0.0438134	0.0289277	TPM2/IDO1/SRI/RPL15/ENO1/SLC2A1/CSRP2/PLEC/SQSTM1/SVIL/AHNAK2/CALM2/FXR1/CALD1/PDLIM1/PDLIM4/CALM3/TNNC2/PYROXD1/PPP1R12A/FLNB/DAG1/ALDOA/CAPZB/FHL2/SPTBN1/AHNAK/TPM1/SYNE2/FLNA/KRT8/DST/ARF1/SDC4/PDLIM5/PDLIM7/SYNC/TPM4/PSEN1/LMAN1/KRT19	41
CC	GO:0005903	brush border	21/2433	101/19520	0.0121135	0.0438134	0.0289277	HSP90AB1/PLEC/MYL6/ACTR3/SLC7A11/ESPN/KCNK1/MYO1B/AMN/CLIC1/SLC34A2/ADD3/DCXR/FLNA/MYO1E/MYO1C/FLII/LIMA1/B4GALT1/EZR/MFSD10	21
CC	GO:0005657	replication fork	15/2433	65/19520	0.0124466	0.0447954	0.029576	PCNA/CDC5L/RTF2/MMS22L/PRIM1/TP53/MCM3/POLD4/HMCES/PLRG1/RFC4/PRPF19/RFC1/RFC3/TEX264	15
CC	GO:0000922	spindle pole	31/2433	166/19520	0.013492	0.0483185	0.0319022	NPM1/IK/RAE1/VPS4B/RAB11A/CKAP2/KATNA1/BOD1/SMC3/MISP/HAUS1/CALM2/CALM3/CDC25B/TOPORS/HNRNPU/NUP62/PPP2CA/KIF2A/PPP2CB/AURKA/CENPF/RAD21/CCNB1/CDC20/SBDS/TPX2/GOLGA2/RMDN1/TPT1/CTNNB1	31
MF	GO:0045296	cadherin binding	126/2416	332/18337	1.68354e-30	1.83169e-27	1.53468e-27	S100A11/STAT1/S100P/HSP90AB1/RPS26/SERBP1/CNN3/RPS2/OLA1/RPL24/GPRC5A/SFN/EIF3E/RAN/RACK1/YWHAB/RPL15/PROM1/ENO1/KIF5B/EIF2A/RDX/SNX2/PLEC/PCMT1/EEF1D/NUDC/HSPA1A/NOTCH3/BZW1/CGN/FNBP1L/ESYT2/ZC3H15/RUVBL1/CALD1/RPL14/YWHAZ/PDLIM1/CDH1/YWHAE/ANXA2/HSPA8/TMPO/NOP56/HNRNPK/MYO1B/FLNB/TAGLN2/SLC9A3R2/ATIC/VAPB/PPP1CA/CLIC1/STK24/CCT8/ALDOA/CAPZB/DBN1/SNX9/BAIAP2/PAICS/EVPL/PKP3/TRIM29/PUF60/PICALM/T…	126
MF	GO:0003735	structural constituent of ribosome	83/2416	180/18337	2.69267e-27	1.46481e-24	1.22729e-24	RPL5/RPS12/RPS6/RPS19/RPL18/RPL13A/RPL28/RPS8/RPS18/RPL11/RPL4/RPS27A/RPL35A/RPS26/RPS11/RPS14/RPL37/RPS9/RPS2/RPS29/RPSA/RPL18A/RPL24/RPS10/RPL10/RPL21/RPS23/RPL27A/RPL10A/MRPL42/RPL8/RPL15/RPS13/RPL26/RPS7/RPS21/MRPS30/RPL22/RPL36AL/MRPL47/RPS20/RPLP1/RPL19/RPS5/MRPS35/RPL31/RPL35/MRPS22/MRPL19/RPS16/RPL32/RPL3/RPL14/RPS4Y1/MRPL3/MRPL37/MRPS9/DAP3/MRPL41/RPL7L1/MRPL22/MRPL20/RPL38/MRPL57/RPS25/…	83
MF	GO:0043021	ribonucleoprotein complex binding	48/2416	134/18337	2.14535e-11	7.78048e-09	6.51886e-09	NPM1/EIF5A/OLA1/RPSA/SRP9/IFIH1/SNRPD1/SNRPD2/RACK1/WDR12/EIF3K/EIF2A/PRPF31/PPIH/RPLP1/NAA10/ETF1/UNG/SNRPA/SPCS1/YBX3/EZH2/C1QBP/NVL/PPP1CA/PHF6/NME1/CPSF6/HNRNPU/TIMM50/SNRPB2/PTCD3/DDX5/PRPF6/SRPRA/NMD3/NOLC1/SRP19/EEF2/GCN1/EIF1/MTIF3/SBDS/NEAT1/SEC61A1/PYM1/SECISBP2/HSPA5	48
MF	GO:0009055	electron transfer activity	48/2416	138/18337	7.06833e-11	1.92259e-08	1.61084e-08	PHGDH/UQCRH/C15orf48/ASPH/IDO1/NDUFB4/NDUFA9/GPX2/COX6B1/NDUFS2/NDUFA4L2/COX7A2/COX5A/IDH3B/NDUFV3/LOXL2/SDHB/NDUFB6/NDUFA4/STEAP4/NDUFS5/NDUFS3/GSR/UQCRFS1/NDUFS1/SURF1/NDUFA2/NDUFA12/COX7A2L/COX5B/NDUFC1/NDUFS6/COX7B/COX7C/GLRX/NDUFA3/NDUFC2/UQCR11/CYBA/COX6A1/NDUFB5/NDUFS8/FDX1/CYB5A/NDUFB10/ALDH2/NDUFB1/NQO2	48
MF	GO:0051082	unfolded protein binding	43/2416	120/18337	2.31321e-10	5.03355e-08	4.21735e-08	DNAJA1/HSP90AB1/NPM1/HSPD1/HSP90AA1/TCP1/HSPE1/CLGN/CCT2/CCT4/CCT3/NACA/SRSF10/TTC1/CCT7/CCT5/HSPA9/NUDC/HSPA1A/PTGES3/PFDN1/PDRG1/TOMM20/CDC37L1/RUVBL2/TRAP1/PFDN4/HSPA8/VBP1/NACA2/CCT8/DNAJB1/CLU/HSPA6/ST13/ERLEC1/HYOU1/PPIA/LMAN1/SPG7/PPIB/CANX/HSPA5	43
MF	GO:0016655	oxidoreductase activity, acting on NAD(P)H, quinone or similar compound as acceptor	28/2416	60/18337	2.7787e-10	5.03871e-08	4.22167e-08	AKR1C2/AKR1C3/NDUFB4/NDUFA9/NDUFS2/NDUFV3/NDUFB6/NDUFA4/AKR1C1/NDUFS5/NDUFS3/CRYZ/NDUFS1/TP53I3/NDUFA2/NDUFA12/NDUFC1/NDUFS6/DCXR/CBR1/NDUFA3/NDUFC2/NDUFB5/NDUFS8/NDUFB10/NQO1/NDUFB1/NQO2	28
MF	GO:0044183	protein folding chaperone	20/2416	36/18337	2.02792e-09	3.15196e-07	2.64087e-07	HSP90AB1/CD74/HSP90AA1/HSPB1/TCP1/CLGN/CCT2/CCT4/CCT3/CCT7/CCT5/HSPA9/HSPA1A/PFDN1/HSPA8/PDCL3/CCT8/DNAJB1/HSPA6/HSPA5	20
MF	GO:0044389	ubiquitin-like protein ligase binding	78/2416	312/18337	1.01995e-08	1.38714e-06	1.16221e-06	RPL5/STAT1/DNAJA1/UBE2L6/TUBA1B/ISG15/HSP90AB1/CXCR4/TUBB/RPL11/RPS27A/HSPD1/HSP90AA1/TCP1/XRCC5/DDX58/PARP9/CCT2/CACYBP/BCL2/NDUFS2/HLTF/TPI1/FANCL/RRAGA/NAE1/PA2G4/JUN/UBE2N/HSPA9/CUL2/HSPA1A/PML/SQSTM1/PSMA3/TP53/VCP/SLC25A5/UBE2L3/YWHAZ/YWHAE/PSMD1/HSPA8/ARRDC1/GPI/NPLOC4/SUMO1/UBE2T/ABI2/SNX9/LAPTM4B/CLU/AURKA/HIF1A/HSPA6/CEBPB/CCDC50/FZD5/PER1/UBE2J1/NEDD8/UBXN1/SLC22A18/UBE2J2/CCNB1/RNF20/…	78
MF	GO:0031625	ubiquitin protein ligase binding	74/2416	293/18337	1.52803e-08	1.84722e-06	1.54769e-06	RPL5/DNAJA1/UBE2L6/TUBA1B/ISG15/HSP90AB1/CXCR4/TUBB/RPL11/RPS27A/HSPD1/HSP90AA1/TCP1/XRCC5/DDX58/CCT2/CACYBP/BCL2/NDUFS2/HLTF/TPI1/FANCL/RRAGA/NAE1/PA2G4/JUN/UBE2N/HSPA9/CUL2/HSPA1A/PML/SQSTM1/PSMA3/TP53/VCP/SLC25A5/UBE2L3/YWHAZ/YWHAE/PSMD1/HSPA8/ARRDC1/GPI/NPLOC4/SUMO1/UBE2T/ABI2/SNX9/LAPTM4B/CLU/AURKA/HIF1A/HSPA6/CCDC50/FZD5/PER1/UBE2J1/NEDD8/UBXN1/SLC22A18/UBE2J2/RNF20/TMBIM6/TXNIP/JKAMP/UBE2A…	74
MF	GO:0045182	translation regulator activity	43/2416	138/18337	2.96274e-08	3.22346e-06	2.70077e-06	EEF1A1/EIF5A/RPS14/SHMT1/RPS9/EIF2AK2/EIF3E/RPL10/PAIP1/EIF3M/EIF4EBP1/EIF3K/RPL22/EIF2A/EEF1D/CNBP/EIF4A1/ETF1/EIF3D/FXR1/SHMT2/HBS1L/EIF4A2/EIF2B3/C1QBP/EIF3I/ABCF1/TYMS/PAIP2/EIF5B/EIF3L/EEF1B2/EIF5/EIF1AX/EIF3F/CELF1/EEF2/EIF2S2/GCN1/DENR/EIF1/MTIF3/EIF3B	43
MF	GO:0023026	MHC class II protein complex binding	12/2416	17/18337	8.68224e-08	8.58753e-06	7.19504e-06	HLA-DRA/HSP90AB1/CD74/HLA-DRB1/HSP90AA1/HLA-DMA/CD81/HLA-DMB/YWHAE/HSPA8/ANXA11/ATP1B1	12
MF	GO:0016651	oxidoreductase activity, acting on NAD(P)H	34/2416	102/18337	1.3297e-07	1.2056e-05	1.01011e-05	AKR1C2/AKR1C3/NDUFB4/NDUFA9/NDUFS2/NDUFV3/NDUFB6/NDUFA4/AKR1C1/NDUFS5/NDUFS3/GSR/CRYZ/CYB5R4/NDUFS1/TP53I3/TXNRD2/NDUFA2/NDUFA12/NDUFC1/NDUFS6/DCXR/CBR1/POR/NDUFA3/NDUFC2/CYBA/NDUFB5/NDUFS8/TXNRD1/NDUFB10/NQO1/NDUFB1/NQO2	34
MF	GO:0003955	NAD(P)H dehydrogenase (quinone) activity	21/2416	48/18337	1.87711e-07	1.49035e-05	1.24869e-05	NDUFB4/NDUFA9/NDUFS2/NDUFV3/NDUFB6/NDUFA4/NDUFS5/NDUFS3/NDUFS1/NDUFA2/NDUFA12/NDUFC1/NDUFS6/NDUFA3/NDUFC2/NDUFB5/NDUFS8/NDUFB10/NQO1/NDUFB1/NQO2	21
MF	GO:0090079	translation regulator activity, nucleic acid binding	35/2416	108/18337	1.91773e-07	1.49035e-05	1.24869e-05	EEF1A1/EIF5A/SHMT1/EIF3E/PAIP1/EIF3M/EIF3K/EIF2A/EEF1D/EIF4A1/ETF1/EIF3D/SHMT2/HBS1L/EIF4A2/EIF2B3/C1QBP/EIF3I/ABCF1/TYMS/PAIP2/EIF5B/EIF3L/EEF1B2/EIF5/EIF1AX/EIF3F/CELF1/EEF2/EIF2S2/GCN1/DENR/EIF1/MTIF3/EIF3B	35
MF	GO:0098641	cadherin binding involved in cell-cell adhesion	12/2416	18/18337	2.29052e-07	1.66139e-05	1.39199e-05	S100A11/CNN3/PDLIM1/ANXA2/PPP1CA/BAIAP2/PKP3/TRIM29/ANXA1/PDLIM5/BAIAP2L1/KRT18	12
MF	GO:0019843	rRNA binding	24/2416	64/18337	8.18668e-07	5.56694e-05	4.66425e-05	RPL5/RPS18/RPL11/RPS11/RPS14/RPL37/RPS9/RPF2/NOP53/RPL8/RPS13/RPS5/RPL3/RPS4Y1/RPF1/ANG/PTCD3/MRPL20/MRPL16/MRPS18A/RPL12/EEF2/SBDS/MRPS7	24
MF	GO:0003954	NADH dehydrogenase activity	19/2416	45/18337	1.39281e-06	7.97568e-05	6.68241e-05	NDUFB4/NDUFA9/NDUFS2/NDUFV3/NDUFB6/NDUFA4/NDUFS5/NDUFS3/NDUFS1/NDUFA2/NDUFA12/NDUFC1/NDUFS6/NDUFA3/NDUFC2/NDUFB5/NDUFS8/NDUFB10/NDUFB1	19
MF	GO:0008137	NADH dehydrogenase (ubiquinone) activity	19/2416	45/18337	1.39281e-06	7.97568e-05	6.68241e-05	NDUFB4/NDUFA9/NDUFS2/NDUFV3/NDUFB6/NDUFA4/NDUFS5/NDUFS3/NDUFS1/NDUFA2/NDUFA12/NDUFC1/NDUFS6/NDUFA3/NDUFC2/NDUFB5/NDUFS8/NDUFB10/NDUFB1	19
MF	GO:0050136	NADH dehydrogenase (quinone) activity	19/2416	45/18337	1.39281e-06	7.97568e-05	6.68241e-05	NDUFB4/NDUFA9/NDUFS2/NDUFV3/NDUFB6/NDUFA4/NDUFS5/NDUFS3/NDUFS1/NDUFA2/NDUFA12/NDUFC1/NDUFS6/NDUFA3/NDUFC2/NDUFB5/NDUFS8/NDUFB10/NDUFB1	19
MF	GO:0008135	translation factor activity, RNA binding	28/2416	84/18337	1.65948e-06	9.02759e-05	7.56375e-05	EEF1A1/EIF5A/EIF3E/EIF3M/EIF3K/EIF2A/EEF1D/EIF4A1/ETF1/EIF3D/HBS1L/EIF4A2/EIF2B3/EIF3I/ABCF1/EIF5B/EIF3L/EEF1B2/EIF5/EIF1AX/EIF3F/EEF2/EIF2S2/GCN1/DENR/EIF1/MTIF3/EIF3B	28
MF	GO:0001094	TFIID-class transcription factor complex binding	8/2416	10/18337	3.15658e-06	0.000163541	0.000137023	FBL/NOP58/ERCC1/RUVBL2/RUVBL1/TP53/AHR/EDF1	8
MF	GO:0051287	NAD binding	20/2416	53/18337	5.96004e-06	0.000294751	0.000246957	PHGDH/GAPDH/IDH2/PARP1/HPGD/NDUFS2/IDH3B/ALDH1B1/AHCY/SORD/HADH/IDH3G/GRHPR/UGDH/CTBP1/IDH3A/HSD17B8/HIBADH/SIRT7/ALDH2	20
MF	GO:0023023	MHC protein complex binding	13/2416	26/18337	6.79289e-06	0.000307944	0.000258011	HLA-DRA/HSP90AB1/CD74/HLA-DRB1/HSP90AA1/HLA-DMA/CD81/HLA-DMB/YWHAE/HSPA8/TAPBPL/ANXA11/ATP1B1	13
MF	GO:0048027	mRNA 5'-UTR binding	13/2416	26/18337	6.79289e-06	0.000307944	0.000258011	RPL5/RPS14/SHMT1/RPS13/RPL26/RPS7/SYNCRIP/CCT5/LARP6/NCL/SHMT2/RSL1D1/DHX36	13
MF	GO:0001618	virus receptor activity	25/2416	76/18337	7.69039e-06	0.000334686	0.000280416	CXCR4/PLSCR1/RPSA/CD55/CD81/HSPA1A/SIVA1/ITGA2/LAMP1/ITGB6/ITGAV/SCARB2/DAG1/CLDN1/EPHA2/PVR/CXADR/CDK1/XPR1/NECTIN2/HYAL2/ICAM1/F11R/BSG/CD46	25
MF	GO:0001883	purine nucleoside binding	81/2416	384/18337	9.43789e-06	0.000381238	0.00031942	GBP1/TUBB2B/EEF1A1/TUBA1A/TUBA1B/IFI44L/HSP90AB1/MX1/TUBB/GBP2/GBP5/GBP4/RERG/OLA1/GNL2/RHOB/DRG2/RAN/ANXA6/SAMHD1/CDC42/RRAGD/GBP3/RAB6B/GTPBP4/ADA/AK3/RAB4A/RRAGA/RAB11A/ARL9/CGAS/RHOD/ATL2/MRAS/DRG1/SEPHS1/RHOF/DAPK1/RTCB/GTPBP8/GNAI3/AK4/HBS1L/DAP3/RAB18/ARL3/RAB34/ARL13B/RAB42/RND3/NME1/RAB2A/BMS1/ARF5/EIF5B/PRPS2/SRPRA/ARF4/TGM2/NOLC1/RRAS/EIF5/RAB25/ARF1/ARL4A/EEF2/RHOC/GNAQ/ARL4D/IFT27/RA…	81
MF	GO:0001882	nucleoside binding	82/2416	390/18337	9.46087e-06	0.000381238	0.00031942	GBP1/TUBB2B/EEF1A1/TUBA1A/TUBA1B/IFI44L/HSP90AB1/MX1/TUBB/GBP2/GBP5/GBP4/CDA/RERG/OLA1/GNL2/RHOB/DRG2/RAN/ANXA6/SAMHD1/CDC42/RRAGD/GBP3/RAB6B/GTPBP4/ADA/AK3/RAB4A/RRAGA/RAB11A/ARL9/CGAS/RHOD/ATL2/MRAS/DRG1/SEPHS1/RHOF/DAPK1/RTCB/GTPBP8/GNAI3/AK4/HBS1L/DAP3/RAB18/ARL3/RAB34/ARL13B/RAB42/RND3/NME1/RAB2A/BMS1/ARF5/EIF5B/PRPS2/SRPRA/ARF4/TGM2/NOLC1/RRAS/EIF5/RAB25/ARF1/ARL4A/EEF2/RHOC/GNAQ/ARL4D/IFT2…	82
MF	GO:0140272	exogenous protein binding	25/2416	77/18337	9.97467e-06	0.000387587	0.000324739	CXCR4/PLSCR1/RPSA/CD55/CD81/HSPA1A/SIVA1/ITGA2/LAMP1/ITGB6/ITGAV/SCARB2/DAG1/CLDN1/EPHA2/PVR/CXADR/CDK1/XPR1/NECTIN2/HYAL2/ICAM1/F11R/BSG/CD46	25
MF	GO:0003743	translation initiation factor activity	19/2416	51/18337	1.25957e-05	0.000461697	0.000386832	EIF3E/EIF3M/EIF3K/EIF2A/EIF4A1/EIF3D/EIF4A2/EIF2B3/EIF3I/EIF5B/EIF3L/EIF5/EIF1AX/EIF3F/EIF2S2/DENR/EIF1/MTIF3/EIF3B	19
MF	GO:0032550	purine ribonucleoside binding	80/2416	381/18337	1.27306e-05	0.000461697	0.000386832	GBP1/TUBB2B/EEF1A1/TUBA1A/TUBA1B/IFI44L/HSP90AB1/MX1/TUBB/GBP2/GBP5/GBP4/RERG/OLA1/GNL2/RHOB/DRG2/RAN/ANXA6/SAMHD1/CDC42/RRAGD/GBP3/RAB6B/GTPBP4/AK3/RAB4A/RRAGA/RAB11A/ARL9/CGAS/RHOD/ATL2/MRAS/DRG1/SEPHS1/RHOF/DAPK1/RTCB/GTPBP8/GNAI3/AK4/HBS1L/DAP3/RAB18/ARL3/RAB34/ARL13B/RAB42/RND3/NME1/RAB2A/BMS1/ARF5/EIF5B/PRPS2/SRPRA/ARF4/TGM2/NOLC1/RRAS/EIF5/RAB25/ARF1/ARL4A/EEF2/RHOC/GNAQ/ARL4D/IFT27/RASEF/…	80
MF	GO:0005525	GTP binding	79/2416	376/18337	1.4047e-05	0.000493005	0.000413063	GBP1/TUBB2B/EEF1A1/TUBA1A/TUBA1B/IFI44L/HSP90AB1/MX1/TUBB/GBP2/GBP5/GBP4/RERG/OLA1/GNL2/RHOB/DRG2/RAN/ANXA6/SAMHD1/CDC42/RRAGD/GBP3/RAB6B/GTPBP4/AK3/RAB4A/RRAGA/RAB11A/ARL9/CGAS/RHOD/ATL2/MRAS/DRG1/SEPHS1/RHOF/DAPK1/RTCB/GTPBP8/GNAI3/AK4/HBS1L/DAP3/RAB18/ARL3/RAB34/ARL13B/RAB42/RND3/NME1/RAB2A/BMS1/ARF5/EIF5B/SRPRA/ARF4/TGM2/NOLC1/RRAS/EIF5/RAB25/ARF1/ARL4A/EEF2/RHOC/GNAQ/ARL4D/IFT27/RASEF/RABL6/…	79
MF	GO:0061650	ubiquitin-like protein conjugating enzyme activity	16/2416	39/18337	1.46971e-05	0.000499701	0.000418673	UBE2L6/UBE2Q2/UBE2N/UBE2D2/UBE2L3/UBE2T/UBE2S/UFC1/CDC34/UBE2Q1/UBE2J1/UBE2J2/UBE2E3/UBE2H/UBE2A/UBE2Z	16
MF	GO:0032549	ribonucleoside binding	80/2416	384/18337	1.71268e-05	0.000556157	0.000465976	GBP1/TUBB2B/EEF1A1/TUBA1A/TUBA1B/IFI44L/HSP90AB1/MX1/TUBB/GBP2/GBP5/GBP4/RERG/OLA1/GNL2/RHOB/DRG2/RAN/ANXA6/SAMHD1/CDC42/RRAGD/GBP3/RAB6B/GTPBP4/AK3/RAB4A/RRAGA/RAB11A/ARL9/CGAS/RHOD/ATL2/MRAS/DRG1/SEPHS1/RHOF/DAPK1/RTCB/GTPBP8/GNAI3/AK4/HBS1L/DAP3/RAB18/ARL3/RAB34/ARL13B/RAB42/RND3/NME1/RAB2A/BMS1/ARF5/EIF5B/PRPS2/SRPRA/ARF4/TGM2/NOLC1/RRAS/EIF5/RAB25/ARF1/ARL4A/EEF2/RHOC/GNAQ/ARL4D/IFT27/RASEF/…	80
MF	GO:0004129	cytochrome-c oxidase activity	13/2416	28/18337	1.89134e-05	0.000556157	0.000465976	C15orf48/COX6B1/NDUFA4L2/COX7A2/COX5A/NDUFA4/SURF1/COX7A2L/COX5B/COX7B/COX7C/COX6A1/CYB5A	13
MF	GO:0015002	heme-copper terminal oxidase activity	13/2416	28/18337	1.89134e-05	0.000556157	0.000465976	C15orf48/COX6B1/NDUFA4L2/COX7A2/COX5A/NDUFA4/SURF1/COX7A2L/COX5B/COX7B/COX7C/COX6A1/CYB5A	13
MF	GO:0016675	oxidoreductase activity, acting on a heme group of donors	13/2416	28/18337	1.89134e-05	0.000556157	0.000465976	C15orf48/COX6B1/NDUFA4L2/COX7A2/COX5A/NDUFA4/SURF1/COX7A2L/COX5B/COX7B/COX7C/COX6A1/CYB5A	13
MF	GO:0016676	oxidoreductase activity, acting on a heme group of donors, oxygen as acceptor	13/2416	28/18337	1.89134e-05	0.000556157	0.000465976	C15orf48/COX6B1/NDUFA4L2/COX7A2/COX5A/NDUFA4/SURF1/COX7A2L/COX5B/COX7B/COX7C/COX6A1/CYB5A	13
MF	GO:0042605	peptide antigen binding	14/2416	32/18337	2.09659e-05	0.000600287	0.000502949	HLA-B/HLA-DRA/HLA-DRB1/HLA-DPA1/HLA-DPB1/TAP1/HLA-C/HLA-E/SLC7A5/HLA-DQB1/TAP2/HLA-F/HLA-A/DHCR24	14
MF	GO:0061631	ubiquitin conjugating enzyme activity	15/2416	36/18337	2.17458e-05	0.000606652	0.000508283	UBE2L6/UBE2Q2/UBE2N/UBE2D2/UBE2L3/UBE2T/UBE2S/CDC34/UBE2Q1/UBE2J1/UBE2J2/UBE2E3/UBE2H/UBE2A/UBE2Z	15
MF	GO:0003727	single-stranded RNA binding	26/2416	88/18337	4.30447e-05	0.00117082	0.000980966	DDX58/HNRNPF/SSB/HNRNPA1/IFIH1/RPS7/HMGB1/LSM14A/RBMX/KHDRBS1/CNBP/LACTB2/HNRNPDL/FXR1/TIA1/RBPMS/HNRNPC/POLR2G/HNRNPU/ZFR/DDX60/ILF3/SNRPC/PNPT1/ANXA1/PABPC4	26
MF	GO:0001091	RNA polymerase II general transcription initiation factor binding	10/2416	19/18337	4.5905e-05	0.00121816	0.00102063	FBL/NOP58/ERCC1/RUVBL2/RUVBL1/TP53/AHR/EDF1/HNRNPU/TAF7	10
MF	GO:0048306	calcium-dependent protein binding	25/2416	84/18337	5.24573e-05	0.00135889	0.00113855	S100A10/S100A11/S100P/S100A16/S100A6/S100A7/ANXA6/S100A14/RBM22/SYT8/S100A13/S100A8/CALM3/TNNC2/ANXA2/CHP1/PEF1/ANXA11/SEC31A/S100A4/ANXA1/ANXA3/S100A9/PDCD6/RAC3	25
MF	GO:0050786	RAGE receptor binding	7/2416	10/18337	5.69456e-05	0.00142814	0.00119657	S100A7/HMGB1/S100A13/S100A8/S100A4/HMGB2/S100A9	7
MF	GO:0008022	protein C-terminus binding	44/2416	185/18337	5.77558e-05	0.00142814	0.00119657	XRCC5/OPTN/SAE1/PCNA/YWHAB/PPP1CC/DYNLT1/SDCBP2/VPS4B/SDC1/MSH2/PEX26/ID1/ERCC1/YWHAQ/CIB1/NCL/IFT52/PHB2/KPNA3/CTBP1/SLC9A3R2/YAP1/VTA1/BAIAP2/PPP2CA/ERBB2/PPP2CB/PRKAA1/CENPF/NIPBL/PRRC2C/SIPA1/DST/MYO1C/EZR/CDC20/TAX1BP3/TOP2A/ATP1B1/RABAC1/CTNNB1/AP2A1/CD2AP	44
MF	GO:0019104	DNA N-glycosylase activity	8/2416	13/18337	6.23218e-05	0.00146275	0.00122556	PCNA/TDG/UNG/APEX1/MBD4/MPG/NTHL1/SMUG1	8
MF	GO:0019001	guanyl nucleotide binding	80/2416	398/18337	6.31887e-05	0.00146275	0.00122556	GBP1/TUBB2B/EEF1A1/TUBA1A/TUBA1B/IFI44L/HSP90AB1/MX1/TUBB/GBP2/GBP5/GBP4/RERG/OLA1/GNL2/RHOB/DRG2/RAN/ANXA6/SAMHD1/CDC42/RRAGD/GBP3/RAB6B/GTPBP4/AK3/RAB4A/RRAGA/RAB11A/ARL9/CGAS/RHOD/ATL2/MRAS/DRG1/SEPHS1/RHOF/DAPK1/RTCB/GTPBP8/GNAI3/AK4/HBS1L/DAP3/RAB18/ARL3/RAB34/ARL13B/RAB42/RND3/NME1/RAB2A/BMS1/ARF5/EIF5B/PRPS2/SRPRA/ARF4/TGM2/NOLC1/RRAS/EIF5/RAB25/ARF1/ARL4A/EEF2/RHOC/GNAQ/ARL4D/IFT27/RASEF/…	80
MF	GO:0032561	guanyl ribonucleotide binding	80/2416	398/18337	6.31887e-05	0.00146275	0.00122556	GBP1/TUBB2B/EEF1A1/TUBA1A/TUBA1B/IFI44L/HSP90AB1/MX1/TUBB/GBP2/GBP5/GBP4/RERG/OLA1/GNL2/RHOB/DRG2/RAN/ANXA6/SAMHD1/CDC42/RRAGD/GBP3/RAB6B/GTPBP4/AK3/RAB4A/RRAGA/RAB11A/ARL9/CGAS/RHOD/ATL2/MRAS/DRG1/SEPHS1/RHOF/DAPK1/RTCB/GTPBP8/GNAI3/AK4/HBS1L/DAP3/RAB18/ARL3/RAB34/ARL13B/RAB42/RND3/NME1/RAB2A/BMS1/ARF5/EIF5B/PRPS2/SRPRA/ARF4/TGM2/NOLC1/RRAS/EIF5/RAB25/ARF1/ARL4A/EEF2/RHOC/GNAQ/ARL4D/IFT27/RASEF/…	80
MF	GO:0003697	single-stranded DNA binding	31/2416	116/18337	7.15541e-05	0.00162189	0.0013589	HSPD1/SUB1/SMC2/HNRNPA1/TSN/SAMHD1/HMGB1/NUCKS1/MSH2/ERCC1/CNBP/SMC4/WBP11/MCM6/RAD51AP1/MCM7/POLR2G/MCM3/MCM2/MCM5/NME1/HMCES/HNRNPU/HNRNPA2B1/DHX36/FAM111A/ANXA1/NABP2/HMGB2/PCBP2/TDP2	31
MF	GO:0003725	double-stranded RNA binding	23/2416	76/18337	7.74958e-05	0.00172072	0.00144171	TUBA1B/HSP90AB1/HSPD1/DDX58/EIF2AK2/IFIH1/ILF2/HMGB1/LSM14A/STAU1/EIF4A1/MRPL44/OAS2/FXR1/OAS1/HNRNPU/ZFR/DDX60/ILF3/CLTC/DHX36/MSN/SLC3A2	23
MF	GO:0004857	enzyme inhibitor activity	77/2416	385/18337	0.000101832	0.00221587	0.00185656	RPL5/CDKN2A/CSTB/GAPDH/NPM1/RPL11/TIMP1/RARRES1/TESC/HSPB1/ANGPTL4/LTF/PARP9/TFPI/SERPING1/SFN/SERPINA1/CST3/RACK1/PTN/APLP2/GCHFR/YWHAB/CDKN2B/SPINK1/BIRC3/RPS7/FURIN/PPP1R1B/C3/LGALS3/SPINT1/ATP5IF1/SLPI/PKIB/SERPINB4/CIB1/BOD1/OAZ2/PRPSAP2/SPINT2/CST6/PKIG/SCGB1A1/PROS1/PEBP1/FBXO5/TIMP2/ANXA2/PPP1R35/PPP1R12A/CHP1/PTTG1/APOC1/BST2/WFDC3/ANXA5/OAZ1/ENSA/PRDX5/NCK1/ANXA1/CDC42SE1/NOL3/SET/TMBIM…	77
MF	GO:0030515	snoRNA binding	13/2416	32/18337	0.000105111	0.00224238	0.00187877	XRCC5/NOP58/IMP4/NUDT5/WDR3/DKC1/NOP56/BMS1/BYSL/NOLC1/ISG20/NOP10/SNU13	13
MF	GO:0140296	general transcription initiation factor binding	16/2416	45/18337	0.000115755	0.00242196	0.00202923	FBL/HNRNPF/NOP58/ERCC1/POLR1E/TAF11/RUVBL2/RUVBL1/TP53/GTF2B/THAP7/AHR/EDF1/HNRNPU/TAF7/GTF2A2	16
MF	GO:0016614	oxidoreductase activity, acting on CH-OH group of donors	33/2416	130/18337	0.000126285	0.00259061	0.00217054	PHGDH/AKR1C2/IDH2/AKR1C3/HPGD/MDH1/ALDH3A2/AKR1B10/PTGR1/IDH3B/HSD17B4/AKR1C1/SORD/HADH/IDH3G/AKR1B15/GRHPR/UGDH/CTBP1/HADHA/IDH3A/SDR16C5/DCXR/CBR1/HSD17B8/KDSR/HIBADH/HSD17B11/HSD17B10/HSD3B7/VKORC1/G6PD/CBR3	33
MF	GO:0044548	S100 protein binding	8/2416	14/18337	0.000128578	0.00259061	0.00217054	S100A11/S100A6/CACYBP/ANXA2/AHNAK/ANXA11/ATP2A2/EZR	8
MF	GO:0016616	oxidoreductase activity, acting on the CH-OH group of donors, NAD or NADP as acceptor	31/2416	120/18337	0.000141482	0.00279878	0.00234495	PHGDH/AKR1C2/IDH2/AKR1C3/HPGD/MDH1/AKR1B10/PTGR1/IDH3B/HSD17B4/AKR1C1/SORD/HADH/IDH3G/AKR1B15/GRHPR/UGDH/CTBP1/HADHA/IDH3A/SDR16C5/DCXR/CBR1/HSD17B8/KDSR/HIBADH/HSD17B11/HSD17B10/HSD3B7/G6PD/CBR3	31
MF	GO:0140318	protein transporter activity	12/2416	29/18337	0.000157005	0.00305039	0.00255577	AZGP1/TOMM20/TIMM10/SEC61G/SEC63/TIMM17A/TMED10/TIMM17B/IGF1R/TOMM7/TIMM8B/SEC61A1	12
MF	GO:0003712	transcription coregulator activity	91/2416	480/18337	0.000188656	0.00360102	0.00301711	PSIP1/NUPR1/NPM1/BTG1/NCOA7/MUC1/SUB1/CASP8AP2/TRIM22/PARP9/BASP1/KCTD1/PARP14/SMARCB1/HMGA1/BTG2/HMGB1/NUCKS1/LMCD1/PA2G4/SMARCA2/SMARCC1/NOC2L/HDAC1/HSBP1/HSPA1A/ING4/NMI/BCLAF1/KDM5B/TAF11/RUVBL2/RUVBL1/KDM1A/UBE2L3/EWSR1/LPIN1/CNOT7/CAMTA1/ACTL6A/PDLIM1/APEX1/RBPMS/ARID5A/CTBP1/THRAP3/MED15/CIR1/TRIM38/ARL2BP/EZH2/C1QBP/MED21/EDF1/SRSF2/YAP1/SMARCA4/HNRNPU/CEBPZ/USP22/HDAC3/SDR16C5/FHL2/DNAJB…	91
MF	GO:0016628	oxidoreductase activity, acting on the CH-CH group of donors, NAD or NADP as acceptor	11/2416	26/18337	0.000233342	0.00437717	0.00366741	AKR1C2/AKR1C3/BLVRB/PTGR1/AKR1C1/SRD5A3/DECR1/LBR/BLVRA/TM7SF2/DHCR24	11
MF	GO:0043022	ribosome binding	18/2416	57/18337	0.000251209	0.00463247	0.00388131	EIF5A/OLA1/RPSA/RACK1/EIF3K/EIF2A/NAA10/ETF1/SPCS1/C1QBP/SRP19/EEF2/GCN1/MTIF3/SBDS/SEC61A1/PYM1/HSPA5	18
MF	GO:0015078	proton transmembrane transporter activity	31/2416	124/18337	0.000267338	0.00484773	0.00406167	C15orf48/ATP5F1C/COX6B1/NDUFA4L2/ATP5F1B/ATP5ME/ATP5PB/COX7A2/COX5A/NDUFA4/ATP5F1A/ATP2C1/SLC25A3/SURF1/ATP6V1F/TCIRG1/ATP6V1G1/COX7A2L/ATP6V1B2/COX5B/SLC11A1/COX7B/ATP2A2/COX7C/CLCN3/COX6A1/ATP6V1A/CYB5A/SLC39A8/ATP5MG/ATP6V1E1	31
MF	GO:0098631	cell adhesion mediator activity	18/2416	58/18337	0.000319896	0.00570569	0.00478051	S100A11/CNN3/RPSA/ITGA2/PDLIM1/ANXA2/PPP1CA/BAIAP2/PKP3/TRIM29/DSG2/CXADR/ANXA1/PDLIM5/BAIAP2L1/NPTN/KRT18/BSG	18
MF	GO:0098632	cell-cell adhesion mediator activity	16/2416	49/18337	0.000357491	0.00627339	0.00525615	S100A11/CNN3/PDLIM1/ANXA2/PPP1CA/BAIAP2/PKP3/TRIM29/DSG2/CXADR/ANXA1/PDLIM5/BAIAP2L1/NPTN/KRT18/BSG	16
MF	GO:0001046	core promoter sequence-specific DNA binding	14/2416	40/18337	0.000369313	0.00637798	0.00534378	STAT1/NPM1/SNAPC3/SMARCB1/HDAC1/RUVBL2/TBPL1/TP53/GTF2B/EZH2/SMARCA4/MYC/CEBPB/NR3C1	14
MF	GO:0019887	protein kinase regulator activity	42/2416	190/18337	0.000454497	0.00772644	0.00647359	CDKN2A/HSP90AB1/NPM1/CCNC/TESC/HSPB1/LTF/CDK4/GPRC5A/CXCL10/SFN/RACK1/YWHAB/CDKN2B/HMGB1/PPP1R1B/CCNG1/CD24/RPLP1/PKIB/CSNK2B/CIB1/PKIG/CALM2/CALM3/CCNH/CHP1/CCNL1/GPRC5C/ABI1/NCK1/CCNB1/GCN1/HYAL2/TPX2/DNAJC3/ERBB3/MBIP/YWHAG/DAZAP2/CCND1/CCND3	42
MF	GO:0051117	ATPase binding	23/2416	85/18337	0.000482235	0.00807186	0.006763	FBL/NOP58/CAV1/RAB4A/PEX26/RDX/ATP1B3/ATP5IF1/RUVBL2/RUVBL1/TCIRG1/ATP6V1G1/DNAJB1/SELENOS/UBXN1/EZR/PSEN1/NCSTN/SNU13/RAC1/UFD1/ATP1B1/ATP6V1E1	23
MF	GO:0051087	chaperone binding	26/2416	101/18337	0.000498735	0.00822157	0.00688842	HLA-B/DNAJA1/FGB/HSPD1/HSPE1/PTGES3/ERP29/BAK1/CDC37L1/TP53/TBCC/PFDN4/TIMM10/HSPA8/SOD1/DNAJB1/BAX/CLU/AMFR/GAK/ST13/HES1/HYOU1/GRN/DNAJC3/HSPA5	26
MF	GO:0031491	nucleosome binding	20/2416	70/18337	0.000515199	0.00836621	0.00700962	HDAC2/HMGN2/SMARCB1/SMARCC1/NOC2L/HDAC1/ACTR6/MLLT10/HMGN3/ACTL6A/HNRNPC/HMGN1/THAP7/SSRP1/RNF168/SMARCA4/RBBP4/ZNHIT1/HP1BP3/MLLT6	20
MF	GO:0046982	protein heterodimerization activity	64/2416	324/18337	0.000531241	0.00849986	0.00712159	TUBB2B/TPM2/PAFAH1B3/SRI/RAN/BCL2/SAE1/CAV2/CAV1/RRAGD/SDCBP2/UBA2/P4HB/RRAGA/NAE1/SDCBP/SNX2/EPAS1/CEACAM6/PPP2R1A/ITGA3/BAK1/KATNA1/SMC3/PIK3R1/TAF11/PHB2/TP53/FXR1/BARD1/GCA/YWHAE/POLE4/DDIT3/AHR/ATF3/CENPW/POLE3/NFYC/VAPB/PEF1/TAF7/PPP2CA/ERBB2/BAX/AURKA/HIF1A/CEBPB/MAFG/TPM1/BHLHE40/NOLC1/CYBA/TPM4/TRMT112/ERBB3/TAF6/KRT10/HIP1R/TOP2A/ATP1B1/GTF2A2/XBP1/LSM5	64
MF	GO:0042826	histone deacetylase binding	28/2416	113/18337	0.000602458	0.00949963	0.00795925	HSP90AB1/HDAC2/HSP90AA1/PARP1/NKX3-1/YWHAB/HDAC1/HSPA1A/SFPQ/TP53/YWHAE/CIR1/THAP7/MAPK8/PHF6/RBBP4/HDAC3/HIF1A/CEBPB/NIPBL/DHX36/HES1/NCOR2/CDC20/ZBTB7B/RAC1/TOP2A/CCND1	28
MF	GO:0070008	serine-type exopeptidase activity	6/2416	10/18337	0.000678678	0.0105486	0.00883812	CPD/PRCP/TPP1/HPN/SCPEP1/CTSA	6
MF	GO:0019838	growth factor binding	32/2416	137/18337	0.000775807	0.01174	0.0098363	RPS19/IGFBP3/RPS2/PTN/IGFBP2/IGFBP4/FURIN/DUSP1/COL6A1/TGFBR1/S100A13/TSKU/ITGB4/SEC61B/FGFR3/ITGAV/FGFRL1/NRDC/ERBB2/CEP57/OSMR/TGFBR2/API5/GLG1/IGF1R/SHC1/VASN/IL6ST/COL1A1/HYAL2/LTBP3/ERBB3	32
MF	GO:0008320	protein transmembrane transporter activity	9/2416	21/18337	0.000776909	0.01174	0.0098363	AZGP1/TOMM20/SEC61G/SEC63/TIMM17A/TMED10/TIMM17B/TOMM7/SEC61A1	9
MF	GO:0097718	disordered domain specific binding	12/2416	34/18337	0.000880496	0.013123	0.0109951	GAPDH/HSP90AB1/HSP90AA1/HSPA1A/RRM1/TP53/CALM2/CALM3/TEAD2/CLTC/EZR/SMAD2	12
MF	GO:0019207	kinase regulator activity	46/2416	220/18337	0.000901759	0.0132583	0.0111084	CDKN2A/HSP90AB1/NPM1/CCNC/TESC/HSPB1/LTF/CDK4/GPRC5A/CXCL10/SFN/PIK3R3/RACK1/YWHAB/CDKN2B/HMGB1/PPP1R1B/CCNG1/CD24/RPLP1/PKIB/CSNK2B/CIB1/GSTP1/PKIG/PIK3R1/CALM2/CALM3/CCNH/CHP1/CCNL1/GPRC5C/ABI1/NCK1/CCNB1/LAMTOR3/GCN1/HYAL2/TPX2/DNAJC3/ERBB3/MBIP/YWHAG/DAZAP2/CCND1/CCND3	46
MF	GO:0030674	protein-macromolecule adaptor activity	53/2416	263/18337	0.000953622	0.0138339	0.0115907	FKBP4/TRIM22/OPTN/RACK1/LPL/CAV2/CAV1/COL19A1/KHDRBS1/SDCBP/CNTLN/MLPH/ATP1B3/PEX3/AP2S1/CIB1/SPSB2/SKP1/PIK3R1/HSPA8/SPAG4/SLC9A3R2/AP2M1/ARRDC1/PEF1/IRS1/NUP62/ABI2/BAIAP2/AMFR/ST13/SYNE2/ABI1/NMD3/NOLC1/NCK1/APH1A/YKT6/BET1L/SHC1/TRADD/SNAP29/BET1/NCSTN/PDCD6/SPAG9/HIP1R/VTI1B/ATP1B1/PTPN11/STX10/AKAP13/AP2A1	53
MF	GO:0047485	protein N-terminus binding	26/2416	106/18337	0.00108921	0.0155929	0.0130645	EIF5A/PARP1/EIF3E/PPP1CC/RPS21/SDCBP/SMARCC1/ID1/MORF4L1/YWHAQ/HDAC1/HSPA1A/TAF11/PHB2/TP53/CALM2/CALM3/PDCD10/THAP7/SMARCA4/CSNK2A1/NIPBL/GLRX/PDLIM5/NCOR2/ARF6	26
MF	GO:0031072	heat shock protein binding	29/2416	123/18337	0.00114222	0.0160046	0.0134094	GBP1/DNAJA1/HSP90AB1/HDAC2/FKBP4/ITGB2/HSPA9/DNAJC7/HSPA1A/PTGES3/BAK1/CDC37L1/DNAJC8/HSPA8/AHR/IQCG/ZFP36/TPR/NUP62/CSNK2A1/DNAJB1/BAX/HIF1A/HSPA6/ST13/CHORDC1/FKBP5/NR3C1/HSPA5	29
MF	GO:0004303	estradiol 17-beta-dehydrogenase activity	8/2416	18/18337	0.00114793	0.0160046	0.0134094	AKR1C2/AKR1C3/HSD17B4/AKR1C1/AKR1B15/HSD17B8/HSD17B11/HSD17B10	8
MF	GO:0005158	insulin receptor binding	9/2416	22/18337	0.0011621	0.0160046	0.0134094	SNX2/PHIP/PIK3R1/SNX4/IRS1/IGF1R/IRS2/SHC1/PTPN11	9
MF	GO:0005080	protein kinase C binding	16/2416	54/18337	0.00118338	0.016094	0.0134843	HSPB1/RACK1/CAVIN3/ADAM9/MARCKS/SQSTM1/ITGAV/C1QBP/IRS1/AKT1/HINT1/FLNA/SDC4/PDLIM5/YWHAG/TOP2A	16
MF	GO:0003714	transcription corepressor activity	39/2416	182/18337	0.00132432	0.0176023	0.0147481	CASP8AP2/TRIM22/PARP9/BASP1/KCTD1/PARP14/BTG2/LMCD1/PA2G4/NOC2L/HDAC1/HSBP1/HSPA1A/KDM5B/RUVBL2/CNOT7/APEX1/ARID5A/CTBP1/CIR1/EZH2/C1QBP/SRSF2/YAP1/SMARCA4/HNRNPU/HDAC3/SDR16C5/FHL2/DNAJB1/TCERG1/NCOR2/TLE1/TOB1/TCF25/SIRT7/SAP18/CCND1/TDP2	39
MF	GO:0008097	5S rRNA binding	6/2416	11/18337	0.00132665	0.0176023	0.0147481	RPL5/RPL11/RPF2/NOP53/RPL3/EEF2	6
MF	GO:0017134	fibroblast growth factor binding	9/2416	23/18337	0.00168784	0.022125	0.0185374	RPS19/RPS2/S100A13/FGFR3/ITGAV/FGFRL1/CEP57/API5/GLG1	9
MF	GO:0003924	GTPase activity	61/2416	322/18337	0.00203761	0.0263919	0.0221124	GBP1/TUBB2B/EEF1A1/TUBA1A/TUBA1B/MX1/TUBB/GBP2/GBP5/GBP4/RERG/GNL2/RHOB/DRG2/RAN/CDC42/RRAGD/GBP3/RAB6B/GTPBP4/RAB4A/RRAGA/RAB11A/RHOD/ATL2/MRAS/DRG1/RHOF/GNAI3/TBCC/HBS1L/RAB18/ARL3/RAB34/RAB42/RND3/RAB2A/BMS1/ARF5/EIF5B/SRPRA/ARF4/RRAS/RAB25/ARF1/EEF2/RHOC/GNAQ/ARL4D/IFT27/RASEF/RAB13/RGS10/RHOV/GNB2/RAC1/ARF6/RAB9A/RAC3/RAB1B/RAB5A	61
MF	GO:0048029	monosaccharide binding	18/2416	67/18337	0.00207762	0.0265936	0.0222814	LGALS9/TALDO1/RPIA/P3H2/GPI/P4HA1/ALDOA/PAM/OGFOD3/PYGL/PFKP/GALK1/PLOD3/LMAN1/BSG/EGLN3/G6PD/PLOD2	18
MF	GO:0016853	isomerase activity	34/2416	157/18337	0.00216549	0.0273959	0.0229536	HSPD1/ERO1A/FKBP4/IDI1/PTGDS/TPI1/FKBP2/P4HB/QSOX1/PPIH/RPIA/PTGES3/HSD17B4/PPIL4/KATNA1/DKC1/DDT/ISYNA1/FKBP11/PPIG/GPI/PDIA4/PPIC/FKBP5/PTGES/CRELD2/MIF/GALE/PPIA/FKBP9/TOP2A/PPIB/PTPA/PMM1	34
MF	GO:0042288	MHC class I protein binding	8/2416	20/18337	0.00259064	0.0321058	0.0268998	TUBB/TAP1/HLA-E/ATP5F1B/TAP2/ATP5F1A/VCP/BCAP31	8
MF	GO:0032182	ubiquitin-like protein binding	24/2416	101/18337	0.00261476	0.0321058	0.0268998	UBE2L6/CXCR4/SERBP1/HSPB1/CASP8AP2/PLAA/RAE1/TDG/UBA2/UBE2N/VPS28/PML/SQSTM1/BUB3/UCHL3/RNF168/NPLOC4/NUP62/AMFR/UBXN1/ADRM1/TOP2A/USP16/RBCK1	24
MF	GO:0003755	peptidyl-prolyl cis-trans isomerase activity	12/2416	38/18337	0.00262631	0.0321058	0.0268998	FKBP4/FKBP2/PPIH/PPIL4/FKBP11/PPIG/PPIC/FKBP5/PPIA/FKBP9/PPIB/PTPA	12
MF	GO:1990841	promoter-specific chromatin binding	16/2416	58/18337	0.00268581	0.0324684	0.0272036	STAT1/HDAC2/ERCC1/HDAC1/EHMT2/TP53/KDM1A/GTF2B/EZH2/HNRNPU/DDX5/DNMT1/NIPBL/BMI1/EGR1/WDR13	16
MF	GO:0043236	laminin binding	10/2416	29/18337	0.00285628	0.0341499	0.0286124	RPSA/ADAM9/LGALS3/ITGA3/ITGA2/LGALS1/AGRN/DAG1/CTSS/LYPD3	10
MF	GO:0004860	protein kinase inhibitor activity	18/2416	69/18337	0.00295434	0.0349383	0.029273	CDKN2A/NPM1/TESC/HSPB1/SFN/RACK1/YWHAB/CDKN2B/PPP1R1B/PKIB/CIB1/PKIG/CHP1/NCK1/HYAL2/DNAJC3/MBIP/YWHAG	18
MF	GO:0042277	peptide binding	59/2416	315/18337	0.00310791	0.0363592	0.0304635	HLA-B/HLA-DRA/HSP90AB1/CD74/HLA-DRB1/HLA-DPA1/HLA-DPB1/TAP1/CLTA/HLA-C/CRIP1/CST3/FURIN/HLA-E/ITGB2/PPIH/FBXO2/SLC7A5/HLA-DQB1/PFDN1/ITGA2/TAP2/TOMM20/GSTP1/PIK3R1/PFDN4/KPNA3/LRPAP1/VBP1/AP2M1/PPIG/TPP1/RAMP1/BABAM2/ANG/PICALM/MGST2/KDELR2/CLU/RXRA/HLA-F/KDELR3/FZD5/CLTB/IGF1R/CLSTN1/NOLC1/NPEPPS/PPIC/PTGES/SLC40A1/HLA-A/MGST1/PPIA/ITM2B/NFKBIA/SEC61A1/PPIB/DHCR24	59
MF	GO:0016627	oxidoreductase activity, acting on the CH-CH group of donors	16/2416	59/18337	0.00324264	0.0374032	0.0313382	AKR1C2/AKR1C3/BLVRB/ACADSB/PTGR1/SDHB/AKR1C1/ACADM/RETSAT/SRD5A3/DECR1/LBR/DUS1L/BLVRA/TM7SF2/DHCR24	16
MF	GO:0019003	GDP binding	19/2416	75/18337	0.00328445	0.0374032	0.0313382	GBP1/RERG/RHOB/RAN/RRAGD/RAB4A/MRAS/GNAI3/RAB18/ARL3/RAB42/RAB2A/PRPS2/RRAS/ARF1/RASEF/ARF6/RAB9A/RAB5A	19
MF	GO:0022884	macromolecule transmembrane transporter activity	9/2416	25/18337	0.00330028	0.0374032	0.0313382	AZGP1/TOMM20/SEC61G/SEC63/TIMM17A/TMED10/TIMM17B/TOMM7/SEC61A1	9
MF	GO:0043531	ADP binding	12/2416	39/18337	0.00334582	0.0374947	0.0314149	TAP1/MSH2/GCLC/COQ8A/MSH6/ATP5F1A/RUVBL2/RUVBL1/VCP/MYO6/PRPS2/CHORDC1	12
MF	GO:0003779	actin binding	78/2416	439/18337	0.00337728	0.0374947	0.0314149	GBP1/TPM2/CXCR4/CNN3/MARCKSL1/ANXA6/TMSB4X/PLS3/P4HB/RDX/PLEC/MLPH/MARCKS/ARPC5/FBXO25/SVIL/CGN/CEACAM1/MISP/ACTR3/CALD1/TNS4/PDLIM1/PDLIM4/ESPN/TNNC2/MYO1B/FLNB/SSH3/ARPC1B/MYO6/HNRNPU/DAG1/ALDOA/CAPZB/ANG/DBN1/SPTBN1/KLHL2/ARPC2/GSN/SHROOM3/CAP1/S100A4/TPM1/MAEA/ADD3/SYNE2/FLNA/DST/MSRB1/MYO1E/CAPZA1/INF2/MYO1C/EEF2/FLII/LIMA1/FXYD5/EPS8L2/CORO2A/PDLIM5/BAIAP2L1/EZR/PDLIM7/CTTN/TPM4/SPTAN1/MIB2…	78
MF	GO:0140097	catalytic activity, acting on DNA	41/2416	204/18337	0.00354201	0.0389264	0.0326144	XRCC5/PCNA/TDG/CHD6/ERCC1/RAD1/ALKBH2/PTGES3/DKC1/MCM6/DCLRE1C/RUVBL2/RUVBL1/G3BP1/UNG/MCM7/APEX1/POLE4/MCM3/LIG1/MCM2/MCM5/POLD4/POLE3/NME1/RFC4/MBD4/RFC1/MPG/FEN1/DNMT1/TATDN1/RFC3/DHX36/RECQL/ANXA1/ISG20/NTHL1/TOP2A/SMUG1/TDP2	41
MF	GO:0140297	DNA-binding transcription factor binding	68/2416	376/18337	0.00386485	0.0411372	0.0344668	STAT1/PTMA/CDKN2A/DNAJA1/IFI27/HDAC2/PRAME/NPM1/NCOA7/HSPB1/PARP1/MAD2L2/PARP9/RERG/TBX3/HES6/SRI/BCL2/ID2/NKX3-1/PCNA/SMARCB1/HMGA1/HMGB1/PROX1/JUN/SOX9/NOC2L/HDAC1/TAF11/KLF5/PHB2/TP53/KDM1A/HMGN3/APEX1/ARID5A/CTBP1/THRAP3/GTF2B/DDIT3/DCAF13/EXOSC9/YAP1/SMARCA4/TAF7/HDAC3/SDR16C5/NFE2L2/FHL2/RXRA/TCERG1/MYC/HIF1A/CEBPB/DDX5/PRPF6/BHLHE40/TRIP6/HES1/JUND/NCOR2/TLE1/TAF6/NFKBIA/GTF2A2/CTNNB1/SMAD2	68
MF	GO:0004859	phospholipase inhibitor activity	6/2416	13/18337	0.00389443	0.0411372	0.0344668	SCGB1A1/ANXA2/APOC1/ANXA5/ANXA1/ANXA3	6
MF	GO:0031994	insulin-like growth factor I binding	6/2416	13/18337	0.00389443	0.0411372	0.0344668	IGFBP3/IGFBP2/IGFBP4/ITGB4/ITGAV/IGF1R	6
MF	GO:1990825	sequence-specific mRNA binding	6/2416	13/18337	0.00389443	0.0411372	0.0344668	SSB/SRSF3/LARP6/ETF1/TYMS/SRSF4	6
MF	GO:0046933	proton-transporting ATP synthase activity, rotational mechanism	7/2416	17/18337	0.00397062	0.0415388	0.0348032	ATP5F1C/ATP5F1B/ATP5ME/ATP5PB/ATP5F1A/ATP6V1A/ATP5MG	7
MF	GO:1904680	peptide transmembrane transporter activity	11/2416	35/18337	0.00407768	0.0422525	0.0354012	AZGP1/TAP1/TAP2/TOMM20/SEC61G/SEC63/TIMM17A/TMED10/TIMM17B/TOMM7/SEC61A1	11
MF	GO:0016860	intramolecular oxidoreductase activity	14/2416	50/18337	0.00417678	0.0428711	0.0359195	ERO1A/IDI1/PTGDS/TPI1/P4HB/QSOX1/RPIA/PTGES3/DDT/GPI/PDIA4/PTGES/CRELD2/MIF	14
MF	GO:0033218	amide binding	70/2416	391/18337	0.00438989	0.0446374	0.0373993	HLA-B/HLA-DRA/HSP90AB1/CD74/HLA-DRB1/HLA-DPA1/HLA-DPB1/TAP1/FKBP4/CLTA/HLA-C/CRIP1/CST3/FURIN/HLA-E/FKBP2/ITGB2/PPIH/FBXO2/SLC7A5/HLA-DQB1/PFDN1/ITGA2/TAP2/TOMM20/GSTP1/PIK3R1/VDAC1/PHB2/PFDN4/KPNA3/LRPAP1/VBP1/EPDR1/AP2M1/PPIG/ACBD3/TPP1/RAMP1/BABAM2/ANG/LAPTM4B/PICALM/MGST2/KDELR2/CLU/RXRA/TYMS/HLA-F/KDELR3/FZD5/ACBD6/CLTB/IGF1R/CLSTN1/NOLC1/NPEPPS/PPIC/FKBP5/PTGES/SLC40A1/HLA-A/MGST1/PPIA/ITM2…	70

## Sheet: KEGG
ID	Description	GeneRatio	BgRatio	pvalue	p.adjust	qvalue	geneID	Count
hsa03010	Ribosome	70/1263	158/8112	3.95591e-18	1.29358e-15	9.78568e-16	6125/6206/6194/6223/6141/23521/6158/6202/6222/6135/6124/6233/6165/6231/6205/6208/6167/6203/6187/6235/3921/6142/6152/6204/6134/6144/6228/6157/4736/6132/6138/6207/6154/6201/6227/6146/6166/6224/6176/6143/6193/6160/11224/9801/6217/6161/6122/9045/6192/11222/64965/55173/29093/55052/6169/6230/51263/6234/65005/64979/54948/6181/55168/6136/51121/9553/6159/6232/51081/6182	70
hsa03040	Spliceosome	63/1263	147/8112	1.40005e-15	2.28908e-13	1.73164e-13	6635/220988/3178/6632/6633/153527/23350/6428/84991/10772/10946/27316/51362/4116/55660/988/26121/55696/55110/83443/6432/10465/4670/3303/6636/6634/84950/51729/10569/6626/25949/3183/3312/51340/3190/55119/23450/57461/6427/23451/5356/3192/57819/6629/27339/8559/22827/10713/9879/10915/6637/22916/9939/3310/6631/6625/6429/1655/24148/6434/4809/151903/23658	63
hsa05012	Parkinson disease	92/1263	266/8112	5.57486e-15	6.07659e-13	4.59681e-13	347733/9246/7846/10376/7388/203068/6233/5689/509/5685/4710/4704/5704/1340/5688/4720/293/56901/506/10213/3799/515/5686/1347/1843/9377/518/5690/4731/6390/4712/5684/5714/4697/7416/498/7157/51806/805/292/2773/7332/4725/10131/25828/7385/4722/27173/808/5707/201266/5713/1649/5599/7386/5710/5682/5717/4719/5702/6647/4695/55967/4780/9167/581/9861/5708/1329/4717/4726/1349/1537/1350/51465/5709/4696/11047/118…	92
hsa05171	Coronavirus disease - COVID-19	83/1263	232/8112	1.43829e-14	1.1758e-12	8.89469e-13	6125/6772/6206/6194/6223/6141/23521/9636/4599/6158/6202/6222/2244/6135/6124/6233/2266/6165/6231/6205/2243/6208/6167/23586/6203/5610/6187/6235/3921/6142/6152/3627/6204/64135/1675/6134/717/6144/6228/8503/6157/4736/6132/6138/6207/6154/6201/6227/733/6146/6166/6224/3725/718/115004/6176/6143/6193/5295/6160/4939/11224/6217/6161/6122/9045/6192/5599/4938/6169/6230/6234/6181/715/6136/51121/5595/3572/716/47…	83
hsa05020	Prion disease	90/1263	273/8112	2.80444e-13	1.8341e-11	1.38746e-11	347733/7846/10376/7388/203068/5689/509/5685/4710/4704/8503/5704/1340/5688/4720/858/857/293/56901/506/10213/733/3799/515/5686/1347/9377/518/5690/64764/4731/6390/3303/4712/1460/5684/5714/4697/5295/7416/498/292/4725/7385/4722/5707/3312/5713/1649/5599/7386/5710/5682/5717/4719/5702/3915/6647/4695/55967/9167/148327/1457/581/9861/5708/1329/4717/3310/4726/1349/1537/1350/5709/4696/11047/4718/1958/5595/109…	90
hsa04141	Protein processing in endoplasmic reticulum	63/1263	171/8112	5.43657e-12	2.96293e-10	2.24139e-10	3301/3326/3320/30001/5610/596/9373/10808/23190/5034/26232/23471/3303/10961/578/7322/6500/7415/10952/3312/23480/1649/11231/5599/55666/9871/23645/11253/4780/3337/581/267/3310/22872/6748/27248/10484/51465/55829/51035/9601/118424/10525/3703/10970/7095/80700/6400/23193/3998/5611/1603/6238/6746/824/29927/7353/10134/6184/7494/6396/821/3309	63
hsa05016	Huntington disease	93/1263	306/8112	2.1458e-11	1.00239e-09	7.58289e-10	347733/7846/10376/7388/203068/3066/5689/509/5685/4710/4704/1211/2877/11258/5704/1340/5688/4720/293/56901/506/10213/3799/515/5686/1347/9377/518/5690/64764/4731/3065/6390/1175/2878/4712/5684/5441/5714/4697/7416/498/9519/7157/5438/292/23236/4725/7385/4722/5707/5713/5436/5599/7386/5710/5682/5717/4719/1173/5702/6647/4695/55967/9167/148327/1213/581/9861/5708/1329/4717/4726/1349/1537/1350/1212/7052/5709…	93
hsa05415	Diabetic cardiomyopathy	67/1263	203/8112	3.2312e-10	1.32075e-08	9.99121e-09	2597/7388/509/142/4710/4704/8503/1340/4720/5501/293/56901/506/6513/515/1347/9377/7046/518/4731/6390/51660/4712/1509/4697/5295/7416/498/292/23236/4725/7385/4722/2936/5599/7386/4719/3667/5499/5500/4695/55967/9167/207/1329/4717/7048/4726/1349/1537/488/1350/4696/4718/10975/7419/1535/1337/4711/4728/1277/5879/4716/2539/5524/4087/4707	67
hsa05010	Alzheimer disease	105/1263	384/8112	1.04361e-09	3.79178e-08	2.8684e-08	347733/7846/10376/2597/7388/203068/5689/509/5685/5610/4710/4704/8503/5704/1340/5688/4720/4023/293/56901/506/10213/3799/515/5686/1347/8883/9377/518/5690/4731/6390/4712/1460/5684/25825/5714/4697/5295/7416/498/51806/1452/805/292/23236/4725/7385/4722/27173/808/5707/201266/5713/1649/5599/7386/5710/5682/5717/4719/10313/3667/5702/4695/55967/9167/1457/207/9861/5708/1329/4717/4726/1349/7855/1537/488/1350/…	105
hsa00190	Oxidative phosphorylation	49/1263	134/8112	1.72894e-09	5.65363e-08	4.27685e-08	7388/509/4710/4704/1340/4720/56901/506/521/515/1347/9377/518/4731/6390/4712/4697/498/4725/7385/4722/7386/4719/5464/9296/10312/4695/55967/9550/9167/526/1329/4717/4726/1349/1537/1350/4696/4718/10975/1337/4711/4728/523/10632/4716/529/537/4707	49
hsa05208	Chemical carcinogenesis - reactive oxygen species	69/1263	223/8112	3.96424e-09	1.17846e-07	8.9148e-08	7388/1646/8644/509/4710/4704/8503/1340/4720/293/56901/506/515/1347/79852/4233/9377/3725/518/4731/6390/4712/7422/23683/4697/5295/1645/7416/498/292/4725/7385/4722/5599/7386/196/4719/6647/4695/55967/4780/4258/9167/2309/207/1329/4717/3091/4726/1349/1537/1350/873/4696/4718/5595/10975/7419/1535/1337/4711/4728/4257/4792/5879/4716/5781/1728/4707	69
hsa03050	Proteasome	24/1263	46/8112	8.21032e-09	2.23731e-07	1.69248e-07	5698/5689/5696/5685/5704/5688/5721/5720/10213/5686/5690/5684/5714/5707/5713/5710/5682/5717/5702/9861/5708/5709/11047/7979	24
hsa05014	Amyotrophic lateral sclerosis	95/1263	364/8112	8.2823e-08	2.08332e-06	1.57598e-06	347733/7846/10376/7388/203068/5689/509/5685/4710/4704/10133/220988/3178/2877/11258/596/5704/1340/5688/4720/6428/8480/56901/506/10213/3799/515/400916/5686/1347/9377/518/5690/6432/4731/6390/2878/4712/8878/5684/5714/4697/7416/498/7157/7415/4725/7385/4722/5707/5713/1649/7386/5710/5682/5717/4719/7175/9217/23636/5702/283/6647/4695/55967/9167/581/9861/5708/311/1329/4717/4726/1349/3181/1537/1350/5709/469…	95
hsa04612	Antigen processing and presentation	31/1263	78/8112	1.97354e-07	4.60962e-06	3.48708e-06	3106/3122/3326/972/3123/3113/3115/6890/3320/3108/1514/567/3107/1508/5721/3133/5720/3308/3109/3119/3303/6891/3312/4802/3134/3310/5641/1520/3105/821/3309	31
hsa04932	Non-alcoholic fatty liver disease	49/1263	155/8112	3.54958e-07	7.73808e-06	5.85369e-06	7388/4710/4704/8503/1340/4720/998/56901/1347/9377/3725/4731/6390/4712/4697/5295/4725/7385/4722/1649/5599/7386/4719/3667/4695/55967/9167/207/581/6256/5562/1329/4717/4726/1349/1537/1350/4696/4718/8660/10975/1337/4711/4728/5879/4716/7494/4707/7132	49
hsa05169	Epstein-Barr virus infection	58/1263	202/8112	1.1584e-06	2.36748e-05	1.79094e-05	6772/3106/3122/9636/3123/3066/3113/3115/6890/3108/567/23586/5610/1019/3107/3627/596/8503/5704/3133/10213/3725/3109/3065/3119/578/6891/5714/5295/4939/7157/5707/9541/5713/5599/5710/4938/5717/5702/207/581/9861/4609/5708/3134/3280/5709/11047/10912/9612/8717/7979/3105/3383/4792/5879/595/896	58
hsa04110	Cell cycle	41/1263	126/8112	1.38356e-06	2.66132e-05	2.01323e-05	1029/3066/10459/7029/1019/2810/5111/7529/1030/10971/3065/9184/9126/4175/6500/7157/5000/23595/4176/7534/7531/994/902/7272/4172/4171/4174/9232/51529/4609/5885/983/891/10912/991/246184/119504/7532/595/4087/896	41
hsa05022	Pathways of neurodegeneration - multiple diseases	111/1263	476/8112	3.24835e-06	5.90116e-05	4.4641e-05	347733/9246/7846/10376/7388/203068/6233/5689/509/5685/4710/4704/10133/2877/11258/596/5704/1340/5688/4720/293/56901/506/10213/3799/515/5686/1347/9377/518/5690/4731/6390/2878/4712/578/8878/1460/5684/5714/4697/7416/498/51806/1452/805/7415/292/7332/23236/4725/10131/7385/4722/808/5707/5713/1649/5599/7386/5710/5682/5717/4719/9217/5702/6647/4695/55967/9167/1457/581/9861/5708/1329/4717/4726/1349/7855/153…	111
hsa03060	Protein export	13/1263	23/8112	7.34671e-06	0.000126441	9.56497e-05	6726/10952/28972/23480/60559/11231/6734/6728/83943/7095/29927/9789/3309	13
hsa04142	Lysosome	39/1263	132/8112	3.19491e-05	0.000522368	0.00039516	135112/1514/1211/1508/10577/967/1509/968/79158/138050/410/285362/3916/3373/2799/2629/1200/950/9476/54/55353/84572/10312/1515/175/1213/2717/6556/2517/8763/1212/5641/8943/1520/5476/8692/1174/2720/537	39
hsa03410	Base excision repair	15/1263	33/8112	4.53161e-05	0.000705637	0.000533799	142/5111/3146/6996/7374/328/56655/3978/57804/54107/8930/4350/2237/4913/23583	15
hsa05166	Human T-cell leukemia virus 1 infection	57/1263	222/8112	5.56348e-05	0.000791897	0.000599053	3106/3122/1029/3123/3113/3115/3108/567/1019/3107/5901/8503/1030/293/3133/6513/7046/3725/3689/3109/64764/3119/2114/9184/5295/7416/9519/7157/292/2224/5599/9232/7538/51529/148327/207/581/4609/3134/7048/1958/5595/7419/331/5902/991/3105/3383/246184/119504/4792/706/595/821/4087/896/7132	57
hsa04714	Thermogenesis	59/1263	232/8112	5.56992e-05	0.000791897	0.000599053	6194/7388/509/29078/4710/4704/1340/4720/6598/56901/506/521/515/1347/9377/6595/6599/518/64764/4731/6390/4712/4697/498/23028/4725/86/7385/4722/11343/388753/7386/4719/6597/4695/55967/9167/148327/5562/1329/4717/4726/1349/1537/1350/4696/4718/10975/1337/25915/4711/4728/57104/284184/10632/4716/28958/4707/55744	59
hsa04218	Cellular senescence	43/1263	156/8112	7.98734e-05	0.00108828	0.000823257	3106/1029/3486/1019/3107/8503/1030/1978/5501/293/3133/7046/5810/22808/8878/5295/7416/7157/51806/805/292/808/5499/5928/5500/2309/207/4609/3134/7048/6237/983/891/10912/9261/5595/7419/3105/678/824/595/4087/896	43
hsa03030	DNA replication	15/1263	36/8112	0.000153307	0.00200525	0.00151693	5111/5557/4175/4176/56655/4172/3978/4171/4174/57804/54107/5984/5981/2237/5983	15
hsa05416	Viral myocarditis	21/1263	60/8112	0.000163061	0.00205081	0.00155139	3106/3122/3123/3113/3115/3108/3107/857/1604/3133/3689/3109/3119/1605/3134/1525/3105/3383/5879/5881/595	21
hsa04145	Phagosome	41/1263	152/8112	0.000194359	0.0023539	0.00178067	347733/3106/3122/7846/10376/3123/203068/3113/3115/6890/3108/1514/3107/3133/718/3689/3109/3119/3673/6891/10952/23480/3916/3685/9296/10312/9550/1783/526/3134/715/1535/1520/523/3105/5879/29927/5868/821/529/537	41
hsa05132	Salmonella infection	60/1263	249/8112	0.000243587	0.00284475	0.00215199	6281/347733/7846/10376/2597/3326/203068/3320/8743/388/11258/596/998/6993/330/1434/3799/3725/10092/578/113146/6500/10096/25828/3839/10627/302/2317/5599/10095/64746/4646/51626/51429/207/581/1783/10109/4609/79026/2316/10006/6237/103910/375/9266/5595/837/8717/10787/8976/4792/5879/382/9367/5868/8677/10552/1499/7132	60
hsa05130	Pathogenic Escherichia coli infection	49/1263	197/8112	0.000407213	0.00459168	0.0034735	347733/7846/10376/2597/203068/8743/998/3725/10092/9181/578/4691/10096/4430/5599/10972/10095/4646/9871/10458/9076/137075/7082/581/10109/1366/4643/1364/10006/4690/23365/4641/375/9266/5595/7009/837/55971/7430/8717/2017/10787/8976/4792/5879/382/5781/10552/7132	49
hsa05100	Bacterial invasion of epithelial cells	24/1263	77/8112	0.000431495	0.00470329	0.00355794	10459/1211/8503/858/857/998/4233/10092/5295/10096/999/10095/1213/10109/1212/1399/6464/2017/8976/5829/5879/10552/1499/23607	24
hsa05418	Fluid shear stress and atherosclerosis	37/1263	139/8112	0.00051726	0.00545625	0.00412754	3326/3320/1514/596/8503/858/857/6382/1843/3725/9181/8878/7422/2950/5295/7157/51806/805/25828/808/1906/5599/3685/7341/4780/4258/207/5562/1535/6385/3383/4257/5879/5881/1728/1499/7132	37
hsa04510	Focal adhesion	49/1263	201/8112	0.000665012	0.00679559	0.00514072	6696/596/8503/3918/858/857/998/5501/330/3914/4233/1291/3725/1299/3675/3673/7422/5295/3691/10627/3909/3911/4659/2317/5599/3694/3685/5499/5500/3915/2064/207/7410/2316/3480/1399/23396/103910/5595/6464/331/1277/5829/5879/824/5881/595/1499/896	49
hsa04216	Ferroptosis	15/1263	41/8112	0.000811346	0.0080397	0.00608186	2879/2512/6303/2729/23657/7157/9474/8031/2730/7419/30061/64116/5094/6520/81631	15
hsa04610	Complement and coagulation cascades	25/1263	85/8112	0.000866653	0.00833516	0.00630537	2244/2152/2266/2243/7035/710/1675/5265/717/1604/733/5328/718/3689/5627/3075/3426/725/10544/1191/715/966/716/4179/5329	25
hsa05212	Pancreatic cancer	23/1263	76/8112	0.000892759	0.00834092	0.00630972	6772/1029/1019/8503/998/7046/578/7422/5295/7157/5599/2064/207/581/7048/10912/5595/7039/5879/5881/10928/595/4087	23
hsa04144	Endocytosis	58/1263	251/8112	0.000943744	0.00857234	0.00648479	3106/7852/1211/3107/8724/858/857/998/3133/9525/3799/5867/8766/6643/7046/10092/3303/1175/51160/5371/10096/3312/60682/2261/8723/51699/1173/10095/51534/832/381/1213/10109/11059/57154/156/3134/51324/3310/7048/1212/3480/378/56904/23396/829/375/9266/8976/3105/23327/57132/382/92421/5868/10552/160/4087	58
hsa04530	Tight junction	42/1263	169/8112	0.00104424	0.00922878	0.00698137	7846/10376/1019/5111/998/5962/3725/3308/10092/5518/9181/4637/57530/10096/10627/5599/8531/3993/10095/92359/5515/9076/137075/2064/7082/10109/5516/5562/1366/1364/103910/5519/7430/2017/5872/23327/50848/5879/861/4478/10552/595	42
hsa04115	p53 signaling pathway	22/1263	73/8112	0.00121752	0.0104771	0.00792571	1029/3486/1019/2810/596/56475/900/10572/7157/3732/9540/9538/581/983/891/10912/51246/4194/6241/595/64065/896	22
hsa04940	Type I diabetes mellitus	15/1263	43/8112	0.00142786	0.011972	0.00905659	3106/3122/3123/3113/3115/3329/3108/3107/1363/3133/3109/3119/3134/3105/3382	15
hsa05203	Viral carcinogenesis	48/1263	204/8112	0.00168791	0.0137986	0.0104384	3106/1029/3066/5610/1019/3107/8503/7529/1030/998/3133/3725/718/64764/10971/3065/578/5295/9519/7157/6672/7534/7531/2959/3190/3249/8841/148327/581/2934/3134/983/9261/5595/7419/5902/8717/3572/991/3105/5829/4792/5879/7532/23352/2958/595/896	48
hsa05205	Proteoglycans in cancer	48/1263	205/8112	0.00188016	0.0149954	0.0113437	6194/1514/8503/967/858/857/998/5501/6382/4233/5962/5328/22808/3673/7422/5295/7157/4659/2317/3685/5499/27250/5500/2064/207/4609/7410/3091/1655/7855/2316/3480/6237/23365/5595/6385/7430/2017/1277/5829/2065/5879/4478/5781/595/1499/5329/4087	48
hsa05220	Chronic myeloid leukemia	22/1263	76/8112	0.00216495	0.0168557	0.0127509	1029/3066/1019/8503/7046/3065/578/5295/7157/1487/207/581/4609/7048/1399/10912/5595/6464/4792/861/5781/595	22
hsa00240	Pyrimidine metabolism	18/1263	58/8112	0.00229526	0.0174547	0.0132041	978/51251/7378/51020/6240/1503/7372/29922/4830/4907/7298/1890/79077/124583/4832/7083/6241/30833	18
hsa05210	Colorectal cancer	24/1263	86/8112	0.00239969	0.017834	0.0134911	374/596/8503/4436/7046/3725/578/5295/2956/7157/5599/207/2069/581/4609/7048/10912/5595/7039/5879/5881/595/1499/4087	24
hsa05110	Vibrio cholerae infection	16/1263	50/8112	0.00279248	0.020292	0.0153505	30001/10952/23480/9296/10312/9550/11014/7082/526/11015/9601/375/523/29927/529/537	16
hsa05160	Hepatitis C	38/1263	157/8112	0.00292153	0.0203587	0.0154009	6772/4599/23586/5610/1019/3627/3646/8503/7529/3434/975/5518/10971/578/5295/4939/7157/7534/7531/4938/5515/9076/137075/207/581/6256/5516/4609/1366/1364/5519/5595/8717/4792/7532/595/1499/7132	38
hsa05222	Small cell lung cancer	25/1263	92/8112	0.00292617	0.0203587	0.0154009	1019/596/8503/3918/1030/330/3914/3675/578/3673/5295/7157/3909/3911/3685/3915/207/581/6256/4609/10912/331/4792/595/9618	25
hsa05017	Spinocerebellar ataxia	35/1263	143/8112	0.0034495	0.0234997	0.017777	5689/5685/8503/5704/5688/293/10213/5686/5690/5684/5714/5295/7416/9519/292/23236/5707/10528/2959/5713/5599/5710/5682/5717/5702/207/9861/5708/488/5709/11047/2776/7419/7979/7494	35
hsa05165	Human papillomavirus infection	70/1263	331/8112	0.00360928	0.0240864	0.0182208	6772/6696/3106/9636/4599/3066/3659/5610/1019/3107/55502/8503/3918/1978/998/3133/3914/1291/5518/64764/23462/1299/3065/3675/4854/578/3673/57801/7422/5295/9519/7157/1452/3691/3909/3911/3694/3685/3993/92359/9296/3915/5515/10312/9550/148327/207/581/5516/526/3134/7855/3280/1855/5519/5595/523/8717/1277/3105/5663/5829/23352/10134/595/1499/529/537/896/7132	70
hsa03008	Ribosome biogenesis in eukaryotes	28/1263	109/8112	0.0041086	0.0268702	0.0203267	2091/29889/51602/5901/92856/10799/23560/10171/10885/22803/1460/10199/1736/84128/84916/10528/23160/28987/4931/9790/1457/10556/25996/51068/51119/55505/4809/27341	28
hsa05164	Influenza A	40/1263	171/8112	0.00439294	0.0281665	0.0213073	6772/3122/4599/3123/3113/3115/3108/8743/23586/5610/1019/3627/64135/8503/8480/293/8766/3109/3119/5371/578/5295/7416/11100/4939/292/56649/3460/2224/4938/3337/207/581/5595/8717/3383/5611/4792/896/7132	40
hsa04520	Adherens junction	20/1263	71/8112	0.00475221	0.0296941	0.022463	998/4233/7046/4008/1460/999/10458/2064/1457/7082/7048/3480/1500/5595/5819/8976/5879/5881/5792/1499	20
hsa00280	Valine, leucine and isoleucine degradation	15/1263	48/8112	0.00481281	0.0296941	0.022463	5019/39/224/501/36/223/219/34/3033/1892/26275/3030/11112/3028/217	15
hsa04120	Ubiquitin mediated proteolysis	34/1263	142/8112	0.0056426	0.0341691	0.0258482	9246/6233/10055/330/92912/10054/55120/7334/26232/8453/5371/7322/6500/7332/51529/27338/27339/11059/57154/997/55585/51465/118424/10477/7328/331/991/23327/7319/6921/246184/119504/65264/7317	34
hsa00480	Glutathione metabolism	17/1263	58/8112	0.00576633	0.0342834	0.0259347	2879/3418/2877/2729/2878/6240/2950/51056/2936/6611/4258/79017/2730/4257/6241/2539/51060	17
hsa00310	Lysine degradation	18/1263	63/8112	0.00613071	0.0357989	0.0270811	39/224/501/223/219/10919/3033/1892/64754/2146/3030/54904/79723/80854/8985/7468/217/5352	18
hsa00510	N-Glycan biosynthesis	15/1263	50/8112	0.00731756	0.0419797	0.0317567	8813/11282/79644/8818/11253/79868/4247/4245/3703/2683/23193/54344/1603/10195/6184	15
hsa05211	Renal cell carcinoma	19/1263	69/8112	0.00760789	0.0428928	0.0324475	8503/2271/998/6513/4233/2034/3725/8453/7422/5295/207/3091/1399/5595/7039/6921/5879/112399/5781	19
hsa05216	Thyroid cancer	12/1263	37/8112	0.00810479	0.0449197	0.0339808	578/7157/999/7175/581/6256/4609/8031/10912/5595/595/1499	12
hsa01230	Biosynthesis of amino acids	20/1263	75/8112	0.00915376	0.049888	0.0377392	26227/2597/3418/6470/2752/6888/2023/7167/3420/22934/3421/6472/29920/27430/3419/226/5214/5831/113675/5634	20
hsa00561	Glycerolipid metabolism	17/1263	61/8112	0.00991889	0.0531718	0.0402233	4023/224/501/57016/55326/223/219/10555/23175/11343/84513/2717/57104/129642/9663/137964/217	17
hsa05330	Allograft rejection	12/1263	38/8112	0.0102064	0.0538303	0.0407215	3106/3122/3123/3113/3115/3108/3107/3133/3109/3119/3134/3105	12
hsa04137	Mitophagy - animal	19/1263	72/8112	0.0122358	0.0635098	0.0480438	6233/10133/3725/664/51024/22808/8878/1460/7157/5599/9474/1457/2309/3091/6237/54543/9958/23786/81631	19
hsa00340	Histidine metabolism	8/1263	22/8112	0.0140503	0.0714233	0.0540302	224/501/221/223/219/55748/3176/217	8
hsa01524	Platinum drug resistance	19/1263	73/8112	0.0141973	0.0714233	0.0540302	1029/596/8503/330/4436/2067/578/2950/5295/2956/7157/2064/4258/207/581/5595/331/4257/7153	19
hsa00410	beta-Alanine metabolism	10/1263	31/8112	0.0157289	0.0779296	0.058952	224/501/221/223/219/1892/26275/3030/55748/217	10
hsa03018	RNA degradation	20/1263	79/8112	0.01637	0.0789365	0.0597138	694/3329/56915/7832/2023/51010/3313/22803/84186/29883/5393/57819/11340/5214/170506/87178/4848/10140/8761/23658	20
hsa01200	Carbon metabolism	27/1263	115/8112	0.0164149	0.0789365	0.0597138	26227/2597/3418/6470/4190/8802/39/2271/6888/2023/7167/3420/22934/6390/2098/3421/6472/1892/26275/2821/3419/226/5214/113675/5634/25796/2539	27
hsa03430	Mismatch repair	8/1263	23/8112	0.0186717	0.0884878	0.0669391	5111/4436/2956/3978/57804/5984/5981/5983	8
hsa05219	Bladder cancer	12/1263	41/8112	0.0190767	0.0891156	0.0674141	1029/1019/7422/1612/7157/999/2261/2064/4609/1890/5595/595	12
hsa04915	Estrogen signaling pathway	31/1263	138/8112	0.0198164	0.0912671	0.0690416	3326/7031/3320/2288/596/8503/3725/64764/3303/1509/5295/51806/805/2773/23236/808/3312/25984/3872/148327/207/3310/5595/2776/6464/2289/7039/3858/3875/3880/3868	31
hsa05150	Staphylococcus aureus infection	23/1263	96/8112	0.0202556	0.0919941	0.0695915	3122/3123/3113/2266/3115/3108/1675/717/718/3689/3109/3119/3075/25984/3426/3872/715/3383/716/3858/3875/3880/3868	23
hsa05145	Toxoplasmosis	26/1263	112/8112	0.0210127	0.0941253	0.0712038	6772/3122/3123/3113/3115/3108/596/3918/330/3914/3109/3119/3303/2773/3312/3909/3911/3460/5599/3915/207/3310/5595/331/4792/7132	26
hsa05332	Graft-versus-host disease	12/1263	42/8112	0.0230366	0.101797	0.0770072	3106/3122/3123/3113/3115/3108/3107/3133/3109/3119/3134/3105	12
hsa04659	Th17 cell differentiation	25/1263	108/8112	0.0241061	0.105102	0.0795077	6772/3122/3326/3123/3113/3115/3320/3108/7046/3725/3109/3119/3460/5599/196/6097/6256/3091/7048/5595/3572/4792/861/9466/4087	25
hsa05323	Rheumatoid arthritis	22/1263	93/8112	0.0261897	0.112685	0.0852435	3122/3123/3113/3115/3108/1514/284/3725/3689/3109/3119/7422/9296/54/10312/9550/6364/526/523/3383/529/537	22
hsa04066	HIF-1 signaling pathway	25/1263	109/8112	0.0268136	0.113477	0.0858426	6194/2597/7076/596/8503/284/1978/2023/6513/8453/7422/5295/2872/3460/1906/226/5163/2064/207/3091/5214/3480/5595/6921/112399	25
hsa04210	Apoptosis	30/1263	136/8112	0.027361	0.113477	0.0858426	7846/10376/142/1514/8743/4001/1508/596/8503/330/3725/578/1509/5295/7157/1649/5599/1515/207/581/10912/5595/331/1520/8717/6709/4792/824/4000/7132	30
hsa05131	Shigellosis	50/1263	247/8112	0.0274148	0.113477	0.0858426	6233/596/8503/998/58528/10670/3725/718/10092/7334/115004/9181/664/7322/8878/54874/6500/5295/7416/10096/7157/23236/10627/5599/10318/10095/9474/2309/207/581/10109/1399/103910/375/9140/9266/5595/837/8717/2017/8976/5829/4792/5879/382/824/10552/10616/81631/7132	50
hsa04114	Oocyte meiosis	29/1263	131/8112	0.0284203	0.116168	0.0878786	10459/7529/5501/5518/10971/9126/6500/51806/805/26271/7534/808/7531/9232/5499/5500/51529/5515/5516/6790/3480/983/891/5519/5595/991/246184/119504/7532	29
hsa04933	AGE-RAGE signaling pathway in diabetic complications	23/1263	100/8112	0.0317645	0.128235	0.0970067	6772/2152/1019/596/8503/998/7046/3725/7422/5295/23236/1906/5599/207/581/7048/1958/5595/1277/3383/5879/595/4087	23
hsa05162	Measles	30/1263	139/8112	0.0358538	0.142978	0.10816	6772/4599/23586/5610/1019/64135/596/8503/10399/3725/3303/578/1460/5295/4939/7157/3312/5599/4938/1457/207/581/3310/8717/4792/9367/4478/595/4179/896	30
hsa05230	Central carbon metabolism in cancer	17/1263	70/8112	0.0372788	0.14687	0.111104	3418/9123/8503/6513/4233/8140/5295/7157/2261/5163/2064/207/4609/3091/5214/5595/2539	17
hsa00270	Cysteine and methionine metabolism	13/1263	50/8112	0.0388172	0.15111	0.114311	26227/51074/4190/4507/2729/191/27430/6611/23743/1786/113675/2730/10768	13
hsa05225	Hepatocellular carcinoma	35/1263	168/8112	0.0401145	0.154019	0.116512	1029/1019/8503/6598/4233/6595/6599/7046/578/2950/5295/7157/1452/86/10587/6597/4780/4258/207/581/4609/7048/7855/3480/10912/1855/5595/6464/7296/7039/4257/1728/595/1499/4087	35
hsa04390	Hippo signaling pathway	33/1263	157/8112	0.0405066	0.154019	0.116512	374/6657/3398/7529/5501/330/7046/3397/3689/5518/10971/7534/999/7531/8463/3993/5499/10413/5500/5515/5516/4609/7048/7855/1855/5519/1454/7532/1453/595/1499/4087/896	33
hsa04140	Autophagy - animal	30/1263	141/8112	0.0425351	0.159873	0.120941	1514/1508/596/8503/58528/3146/10670/664/22808/8878/1509/1612/5295/3916/5599/3667/9474/5515/54541/207/5516/5562/3091/3480/6237/9140/8660/5595/9342/81631	30
hsa04260	Cardiac muscle contraction	20/1263	87/8112	0.0433603	0.161123	0.121886	7169/7388/444/1340/1347/9377/483/7385/7386/9167/1329/1349/7168/1537/488/1350/10975/1337/7171/481	20
hsa04670	Leukocyte transendothelial migration	25/1263	114/8112	0.0439763	0.161576	0.122229	7852/8503/998/3689/5295/4267/2773/10627/9076/137075/7410/1366/6494/1364/103910/1500/1535/7430/3383/50848/5829/5879/4478/5781/1499	25
hsa05223	Non-small cell lung cancer	17/1263	72/8112	0.0475098	0.172172	0.130244	1029/1019/8503/3799/4233/578/5295/7157/2064/2309/207/581/6256/10912/5595/7039/595	17
hsa04966	Collecting duct acid secretion	8/1263	27/8112	0.0479133	0.172172	0.130244	9296/760/10312/9550/526/523/10723/529	8
hsa04213	Longevity regulating pathway - multiple species	15/1263	62/8112	0.0499392	0.177501	0.134276	3066/8503/3065/3303/5295/3312/3667/9474/6647/2309/207/5562/3310/3480/8660	15
hsa05134	Legionellosis	14/1263	57/8112	0.050942	0.178001	0.134654	1915/3329/718/3689/664/3303/7415/3312/10767/3310/375/23786/4792/81876	14
hsa05167	Kaposi sarcoma-associated herpesvirus infection	39/1263	194/8112	0.0516318	0.178001	0.134654	6772/3106/6233/5610/1019/3107/8503/2786/3133/3055/3725/718/578/7422/5295/7157/51806/805/808/5599/7538/207/581/4609/3091/3134/9261/5595/8717/3572/3105/3383/4792/2783/5879/595/1499/81631/7132	39
hsa04960	Aldosterone-regulated sodium reabsorption	10/1263	37/8112	0.0517294	0.178001	0.134654	2810/8503/483/6337/5295/9351/3667/5595/23327/481	10
hsa00380	Tryptophan metabolism	11/1263	42/8112	0.052257	0.178001	0.134654	8942/3620/39/224/501/223/219/3033/1892/3030/217	11
hsa05213	Endometrial cancer	14/1263	58/8112	0.0579223	0.195264	0.147713	8503/578/5295/7157/999/2064/2309/207/581/4609/10912/5595/595/1499	14
hsa05163	Human cytomegalovirus infection	44/1263	225/8112	0.0602324	0.200637	0.151777	3106/1029/7852/6890/567/1019/3107/8503/2786/1978/3133/115004/64764/578/7422/6891/5295/7157/51806/805/2773/23236/808/3685/148327/207/581/4609/3134/1399/23365/5595/2776/8717/3105/5829/4792/2783/5879/5881/595/1499/11214/7132	44
hsa00071	Fatty acid degradation	11/1263	43/8112	0.0607432	0.200637	0.151777	39/224/501/36/223/219/34/3033/1892/3030/217	11
hsa05214	Glioma	17/1263	75/8112	0.0663512	0.216969	0.164132	1029/1019/8503/578/5295/7157/51806/805/808/207/581/3480/10912/5595/6464/7039/595	17
hsa04722	Neurotrophin signaling pathway	25/1263	119/8112	0.0680879	0.220443	0.16676	596/8503/998/3725/5295/7157/51806/805/808/7531/5599/3667/2309/207/581/9500/1399/9261/5595/6464/396/5663/4792/5879/5781	25
hsa05120	Epithelial cell signaling in Helicobacter pylori infection	16/1263	70/8112	0.0688351	0.220677	0.166938	998/4233/3725/5599/9296/10312/9550/7082/526/523/50848/4792/5879/5781/529/537	16
hsa00513	Various types of N-glycan biosynthesis	10/1263	39/8112	0.0708459	0.224919	0.170146	11282/11253/79868/4247/4245/3703/2683/1603/10195/6184	10
hsa00670	One carbon pool by folate	6/1263	20/8112	0.077892	0.241116	0.182399	6470/10797/6472/471/4522/7298	6
hsa05170	Human immunodeficiency virus 1 infection	41/1263	212/8112	0.0779729	0.241116	0.182399	3106/7852/6890/567/3107/596/8503/2786/25939/3133/3725/115004/578/6891/6500/5295/51806/805/2773/808/5599/60489/684/207/581/3134/1399/983/891/5595/2776/8717/3105/1174/6921/5829/4792/2783/5879/5881/7132	41
hsa04514	Cell adhesion molecules	30/1263	149/8112	0.0786279	0.241116	0.182399	3106/3122/3123/3113/3115/3108/3107/3133/6382/3689/3109/3119/4267/999/3685/9076/214/137075/3134/5817/2734/1366/1364/3385/5819/6385/3105/3383/50848/5792	30
hsa04810	Regulation of actin cytoskeleton	42/1263	218/8112	0.0788973	0.241116	0.182399	7852/8503/7114/998/5501/5962/3689/10092/3675/22808/3673/5295/10096/3691/10627/4659/2261/3694/54961/3685/10095/5499/5500/10152/10458/10109/2934/7410/1399/23396/6237/103910/23365/5595/7430/10787/8976/5829/5879/5881/4478/10552	42
hsa05140	Leishmaniasis	17/1263	77/8112	0.081397	0.244279	0.184791	6772/3122/1915/3123/3113/3115/3108/65108/3725/718/3689/3109/3119/3460/5595/1535/4792	17
hsa04512	ECM-receptor interaction	19/1263	88/8112	0.0820221	0.244279	0.184791	6696/3918/3914/6382/1291/1299/3675/3673/3691/3909/3911/3694/3685/375790/1605/3915/6385/1277/3161	19
hsa00020	Citrate cycle (TCA cycle)	8/1263	30/8112	0.0829202	0.244279	0.184791	3418/4190/8802/2271/3420/6390/3421/3419	8
hsa00030	Pentose phosphate pathway	8/1263	30/8112	0.0829202	0.244279	0.184791	6888/22934/2821/226/5214/5634/25796/2539	8
hsa00330	Arginine and proline metabolism	12/1263	51/8112	0.0886069	0.2587	0.195701	224/501/6303/223/219/51056/29920/6611/5033/55748/5831/217	12
hsa01521	EGFR tyrosine kinase inhibitor resistance	17/1263	79/8112	0.0985109	0.285071	0.21565	6194/596/8503/1978/4233/7422/5295/2261/2064/2309/207/581/3480/5595/6464/7039/2065	17
hsa00620	Pyruvate metabolism	11/1263	47/8112	0.103367	0.293923	0.222347	4190/39/224/2271/501/223/219/9380/2739/98/217	11
hsa03420	Nucleotide excision repair	11/1263	47/8112	0.103367	0.293923	0.222347	5111/2067/56655/902/3978/57804/54107/5984/5981/404672/5983	11
hsa03013	Nucleocytoplasmic transport	22/1263	108/8112	0.107816	0.299198	0.226337	1915/10250/5901/8480/4116/1434/55110/3839/51808/7175/55705/23636/7341/22916/9939/26019/51068/5411/10284/79228/6396/84305	22
hsa01250	Biosynthesis of nucleotide sugars	9/1263	37/8112	0.110153	0.299198	0.226337	2762/55907/7358/2821/2584/55577/2582/5372/54187	9
hsa03015	mRNA surveillance pathway	20/1263	97/8112	0.110156	0.299198	0.226337	10250/5501/4116/55110/5518/2107/10767/5499/11052/5500/5515/22916/5516/9939/26019/5519/5411/8761/10284/84305	20
hsa05215	Prostate cancer	20/1263	97/8112	0.110156	0.299198	0.226337	3326/3320/596/8503/4824/5328/6692/64764/2950/5295/7157/2064/148327/207/3480/5595/7039/4792/595/1499	20
hsa04961	Endocrine and other factor-regulated calcium reabsorption	12/1263	53/8112	0.111527	0.299198	0.226337	1211/8766/483/1175/23236/1173/1213/1212/2776/490/481/160	12
hsa05320	Autoimmune thyroid disease	12/1263	53/8112	0.111527	0.299198	0.226337	3106/3122/3123/3113/3115/3108/3107/3133/3109/3119/3134/3105	12
hsa00450	Selenocompound metabolism	5/1263	17/8112	0.111627	0.299198	0.226337	22929/10587/9061/22928/7296	5
hsa04150	mTOR signaling pathway	30/1263	155/8112	0.11669	0.310224	0.234678	6194/8503/1978/58528/10670/8140/5295/23175/3667/9296/54541/9550/207/5562/526/7855/3480/1855/5595/8649/389541/55004/523/9663/28956/6249/6396/529/6520/7132	30
hsa04330	Notch signaling pathway	13/1263	59/8112	0.118595	0.312746	0.236586	3066/23462/3065/4854/1487/9541/3280/1855/51107/9612/7088/5663/23385	13
hsa05152	Tuberculosis	34/1263	180/8112	0.128634	0.336507	0.254561	6772/3122/972/3123/3113/3115/3329/3108/596/718/3689/3109/3313/3119/1054/1509/51806/805/808/3916/3460/5599/4802/10312/207/581/1051/23365/5595/1520/8717/5868/537/7132	34
hsa01240	Biosynthesis of cofactors	29/1263	153/8112	0.146472	0.38013	0.28756	8942/3620/6470/204/51805/224/50808/2729/219/1503/10797/6472/7372/7358/8566/205/27430/29922/4522/4830/8836/195814/55312/2730/4832/79001/1728/217/5372	29
hsa04723	Retrograde endocannabinoid signaling	28/1263	148/8112	0.153893	0.396244	0.29975	4710/4704/2786/4720/56901/4731/4712/4697/2773/23236/4725/4722/11343/5599/4719/4695/55967/4717/4726/4696/4718/5595/2776/4711/4728/2783/4716/4707	28
hsa04621	NOD-like receptor signaling pathway	34/1263	184/8112	0.158944	0.404433	0.305945	2633/3428/6772/3326/2634/115362/3320/115361/1508/596/330/2635/3725/10135/7416/4939/23236/25828/7531/5599/4938/9474/10910/7205/9140/5595/7419/1535/10628/331/837/4792/10616/81631	34
hsa05142	Chagas disease	20/1263	102/8112	0.159547	0.404433	0.305945	8503/7046/3725/718/5518/5295/2773/23236/3460/5599/5515/207/5516/7048/5519/5595/2776/4792/4087/7132	20
hsa00531	Glycosaminoglycan degradation	5/1263	19/8112	0.161924	0.407301	0.308115	138050/3373/2799/8692/2720	5
hsa04666	Fc gamma R-mediated phagocytosis	19/1263	97/8112	0.168265	0.42002	0.317736	65108/8503/998/3055/4082/10092/5295/10096/10095/207/10109/2934/7410/1399/23396/5595/5879/382/10552	19
hsa00983	Drug metabolism - other enzymes	16/1263	80/8112	0.171404	0.424613	0.321211	978/8833/1066/7378/6240/2950/3704/7372/29922/4830/4258/1890/4832/4257/7083/6241	16
hsa00100	Steroid biosynthesis	5/1263	20/8112	0.189935	0.466983	0.353262	2222/6713/3930/7108/1718	5
hsa05133	Pertussis	15/1263	76/8112	0.195265	0.471844	0.35694	3659/710/717/3725/718/3689/51806/805/2773/808/5599/725/715/5595/716	15
hsa00052	Galactose metabolism	7/1263	31/8112	0.197684	0.471844	0.35694	57016/2717/5214/2584/2683/2582/2720	7
hsa04710	Circadian rhythm	7/1263	31/8112	0.197684	0.471844	0.35694	6500/6097/5562/5187/8553/1454/1453	7
hsa05310	Asthma	7/1263	31/8112	0.197684	0.471844	0.35694	3122/3123/3113/3115/3108/3109/3119	7
hsa04217	Necroptosis	29/1263	159/8112	0.201815	0.477727	0.36139	6772/3326/2512/3320/142/8743/5610/2752/596/330/293/3146/9525/8878/7416/292/3460/5599/581/5836/7419/331/8717/57132/5478/824/92421/10616/7132	29
hsa04350	TGF-beta signaling pathway	18/1263	94/8112	0.20307	0.477727	0.36139	3398/1030/7046/3397/5518/4681/6500/3399/60436/5515/5516/4609/57154/7048/7050/5519/5595/4087	18
hsa04668	TNF signaling pathway	21/1263	112/8112	0.207729	0.485196	0.367041	3659/3627/8503/330/3725/64764/5295/1326/1906/5599/148327/207/6364/1051/5595/4323/8717/3383/3726/4792/7132	21
hsa04071	Sphingolipid signaling pathway	22/1263	119/8112	0.220842	0.504195	0.381413	596/8503/5518/1509/5295/7157/2773/23236/5599/166929/29956/5515/207/581/5516/5519/5595/2776/8717/5879/5881/7132	22
hsa04215	Apoptosis - multiple species	7/1263	32/8112	0.221439	0.504195	0.381413	596/330/578/5599/581/331/7132	7
hsa05135	Yersinia infection	25/1263	137/8112	0.222182	0.504195	0.381413	8503/998/8935/3725/10092/5295/10096/5599/10095/10458/207/10109/7410/1399/23396/23365/5595/2776/8976/5829/4792/5879/382/5881/10552	25
hsa05218	Melanoma	14/1263	72/8112	0.222375	0.504195	0.381413	1029/1019/8503/4233/578/5295/7157/999/207/581/3480/10912/5595/595	14
hsa00520	Amino sugar and nucleotide sugar metabolism	10/1263	49/8112	0.223573	0.504195	0.381413	2762/55907/7358/51167/2821/2584/55577/2582/5372/54187	10
hsa00130	Ubiquinone and other terpenoid-quinone biosynthesis	3/1263	11/8112	0.238573	0.534338	0.404215	51805/79001/1728	3
hsa04012	ErbB signaling pathway	16/1263	85/8112	0.242098	0.538544	0.407397	374/8503/1978/3725/5295/5599/2064/207/2069/4609/1399/4690/5595/6464/7039/2065	16
hsa04919	Thyroid hormone signaling pathway	22/1263	121/8112	0.245851	0.540169	0.408626	6772/3066/8503/6513/483/3065/4854/5295/7157/23236/3685/8841/207/6256/4609/3091/5214/488/5595/481/595/1499	22
hsa00051	Fructose and mannose metabolism	7/1263	33/8112	0.246132	0.540169	0.408626	57016/7167/2762/6652/226/5214/5372	7
hsa00900	Terpenoid backbone biosynthesis	5/1263	22/8112	0.250353	0.54577	0.412863	39/3422/2224/9986/10654	5
hsa04151	PI3K-Akt signaling pathway	60/1263	354/8112	0.2527	0.547238	0.413974	6696/6194/3326/3320/374/1019/4602/596/8503/2786/3918/7529/284/1978/3914/4233/1291/5518/64764/1299/10971/3675/3673/7422/5295/7157/3691/7534/7531/3909/3911/2261/3694/3685/3667/3915/5515/2064/54541/148327/2309/207/2069/6256/5516/5562/4609/9180/1969/3480/5519/5595/7039/1277/2065/2783/5879/7532/595/896	60
hsa03022	Basal transcription factors	9/1263	45/8112	0.259527	0.558324	0.42236	6882/9519/2959/902/6879/404672/8148/6878/2958	9
hsa00910	Nitrogen metabolism	4/1263	17/8112	0.266666	0.56656	0.428591	771/2752/768/760	4
hsa01212	Fatty acid metabolism	11/1263	57/8112	0.26682	0.56656	0.428591	51495/39/36/3295/34/3033/1892/3030/7923/6319/64834	11
hsa05031	Amphetamine addiction	13/1263	69/8112	0.270796	0.571292	0.43217	3066/5501/84152/3725/64764/3065/51806/805/808/5499/5500/148327/2354	13
hsa04657	IL-17 signaling pathway	17/1263	94/8112	0.289017	0.605823	0.458292	3326/6278/3320/3934/3627/3725/6279/5599/6364/1051/3727/5595/8717/2354/6280/4792/9618	17
hsa05202	Transcriptional misregulation in cancer	33/1263	192/8112	0.294297	0.612963	0.463693	26471/3066/3486/51513/3248/3398/5087/4291/330/8842/4233/6495/5328/6692/3065/5371/578/7157/2130/1649/581/6256/4609/1848/7048/1051/1655/648/3480/10912/8148/7468/861	33
hsa04068	FoxO signaling pathway	23/1263	131/8112	0.297756	0.616241	0.466173	8743/8503/1030/7046/26260/664/3276/5295/5599/3667/2309/207/5562/7048/3480/80854/891/10912/9140/8660/5595/1454/595	23
hsa00511	Other glycan degradation	4/1263	18/8112	0.304074	0.624025	0.472062	2629/175/2517/2720	4
hsa04370	VEGF signaling pathway	11/1263	59/8112	0.306843	0.624025	0.472062	3315/8503/998/7422/5295/207/9261/5595/5829/5879/5881	11
hsa05321	Inflammatory bowel disease	12/1263	65/8112	0.307242	0.624025	0.472062	6772/3122/3123/3113/3115/3108/3725/3109/3119/3460/6097/4087	12
hsa04931	Insulin resistance	19/1263	108/8112	0.317848	0.635855	0.48101	8503/5501/6513/64764/5295/5599/3667/5499/5500/148327/207/5562/5836/8660/4792/5781/5792/5524/7132	19
hsa00053	Ascorbate and aldarate metabolism	6/1263	30/8112	0.320844	0.635855	0.48101	224/501/223/219/7358/217	6
hsa00630	Glyoxylate and dicarboxylate metabolism	6/1263	30/8112	0.320844	0.635855	0.48101	6470/4190/2752/39/9380/6472	6
hsa01523	Antifolate resistance	6/1263	30/8112	0.320844	0.635855	0.48101	6470/8714/6472/471/8836/7298	6
hsa03450	Non-homologous end-joining	3/1263	13/8112	0.329735	0.649539	0.491362	7520/64421/2237	3
hsa01210	2-Oxocarboxylic acid metabolism	4/1263	19/8112	0.34198	0.668095	0.505399	3418/3420/3421/3419	4
hsa05417	Lipid and atherosclerosis	36/1263	215/8112	0.343241	0.668095	0.505399	3326/3329/3320/30001/8743/596/8503/998/25833/3725/3308/3303/5295/7157/51806/805/23236/808/3312/1649/5599/4780/207/581/6256/7410/3310/5595/1535/142678/3383/4792/5879/7494/3309/7132	36
hsa00010	Glycolysis / Gluconeogenesis	12/1263	67/8112	0.346639	0.670715	0.507381	2597/224/501/221/2023/7167/223/219/2821/226/5214/217	12
[truncated: 158 more rows]
